# Supplementary material for: Four-Stage Dynamics of the Minoan Ash Cloud and Revised VolumetricParameters: The Critical Bayır Tephra from the Yatağan Basin, Türkiye
Source: Research Square preprint supplement (doi:10.21203/rs.3.rs-8581124/v1), 2026-01-28
Supplement: Supplementary file 1 [file 15e44ffba9f6da09e15487ae.xlsx]

## Sheet: Supplementary table 2
Region	Reference	Deposit	Source	Code	Eruption	SiO2	TiO2	Al2O3	FeO	MnO	MgO	CaO	Na2O	K2O	P2O5	Total		SiO2	TiO2	Al2O3	FeO	MnO	MgO	CaO	Na2O	K2O	P2O5	Total %100			Li7	Sc45	Rb85	Sr88	Y89	Zr90	Nb93	Cs133	Ba137	La139	Ce140	Pr141	Nd146	Sm147	Eu153	Gd157	Tb159	Dy163	Ho165
SAVP	16	T	Kolumbo		Kolumbo	73.83	0.0935	13.06	1.35	0.0769	0.0844	0.812	4.17	4.38		97.8568		75.447	0.0955478	13.346	1.37957	0.0785842	0.0862485	0.829784	4.26133	4.47593		100			23.1369	8.07093	93.0984	48.4238	20.4212	130.021	19.4997	1.71075	423.568	22.3563	37.2586	4.389	14.9286	2.71861	0.352668	2.41896	0.425841	2.82924	0.60733
SAVP	16	T	Kolumbo		Kolumbo	74.12	0.0692	13.17	1.37	0.0919	0.0833	0.8022	4.32	4.15		98.1766		75.4966	0.0704852	13.4146	1.39544	0.0936068	0.0848471	0.817099	4.40023	4.22708		100			21.4353	10.2756	87.3985	62.372	20.0473	138.453	18.1371	1.55851	404.529	22.891	39.9661	4.46717	15.2616	2.7093	0.401813	2.39933	0.424128	2.74956	0.592111
SAVP	16	T	Kolumbo		Kolumbo	72.3	0.07	12.99	1.29	0.1056	0.0915	0.7744	3.94	4.15		95.7115		75.5395	0.0731365	13.572	1.3478	0.110332	0.0955998	0.809098	4.11654	4.33595		100			26.6716	5.84199	108.065	55.6138	22.7972	131.946	18.8918	2.13447	437.085	26.8184	48.0176	5.13946	17.4182	3.03877	0.408588	2.72145	0.480342	3.08424	0.676559
SAVP	16	T	Kolumbo		Kolumbo	63.82	0.009	22.26	0.1773	0	0	3.88	9.18	0.842		100.168		63.7128	0.00898488	22.2226	0.177002	0	0	3.87348	9.16458	0.840585		100			n.d.	n.d.	110.3	58	22.9	126	19.4	n.d.	436	30	57	n.d.	n.d.	n.d.	n.d.	n.d.	n.d.	n.d.	n.d.
SAVP	16	T	Kolumbo		Kolumbo	73.52	0.077	13.11	1.29	0.0925	0.081	0.8129	4.15	4.2		97.3334		75.5342	0.0791095	13.4692	1.32534	0.0950342	0.0832191	0.835171	4.2637	4.31507		100			n.d.	n.d.	106.4	60	22	124	18.9	n.d.	375	24	49	n.d.	n.d.	n.d.	n.d.	n.d.	n.d.	n.d.	n.d.
SAVP	16	T	Kolumbo		Kolumbo	73.46	0.0556	12.92	1.34	0.1075	0.09	0.7956	3.83	4.38		96.9787		75.7486	0.0573322	13.3225	1.38175	0.110849	0.0928039	0.820386	3.94932	4.51646		100			23.3379	10.5435	98.0266	55.4012	22.0934	130.137	19.7337	1.72009	412.28	24.6286	42.902	4.78781	16.2668	2.84771	0.379645	2.59687	0.459303	3.01139	0.636927
SAVP	16	T	Kolumbo		Kolumbo	72.73	0.0787	12.84	1.2268	0.0997	0.0791	0.7473	4.01	4.16		95.9716		75.7828	0.0820034	13.379	1.27829	0.103885	0.0824202	0.778668	4.17832	4.33462		100			17.5957	9.11056	103.395	65.0304	19.7553	148.007	18.2538	2.00765	460.258	25.3092	55.9496	4.91273	16.6448	2.9341	0.432392	2.55186	0.453835	2.8735	0.625926
SAVP	16	T	Kolumbo		Kolumbo	74.01	0.0788	13.19	1.32	0.1153	0.0852	0.7842	4.18	4.3		98.0635		75.4715	0.0803561	13.4505	1.34607	0.117577	0.0868825	0.799686	4.26254	4.38491		100			n.d.	n.d.	111.2	71	23.2	143	19.8	n.d.	465	30	57	n.d.	n.d.	n.d.	n.d.	n.d.	n.d.	n.d.	n.d.
SAVP	16	T	Kolumbo		Kolumbo	73.7	0.0859	13.17	1.32	0.0905	0.1049	0.7764	4.16	4.36		97.7677		75.3828	0.0878613	13.4707	1.35014	0.0925664	0.107295	0.794127	4.25498	4.45955		100			n.d.	n.d.	111.9	68	23.6	146	20	n.d.	468	30	59	n.d.	n.d.	n.d.	n.d.	n.d.	n.d.	n.d.	n.d.
SAVP	16	T	Kolumbo		Kolumbo	72.84	0.0724	12.98	1.29	0.1277	0.1079	0.7476	3.91	4.22		96.2956		75.6421	0.0751852	13.4793	1.33963	0.132612	0.112051	0.776359	4.06041	4.38234		100			n.d.	n.d.	111.2	71	23.5	148	19.9	n.d.	463	30	59	n.d.	n.d.	n.d.	n.d.	n.d.	n.d.	n.d.	n.d.
SAVP	16	T	Kolumbo		Kolumbo	74.14	0.0664	12.96	1.32	0.1113	0.1185	0.7415	4.13	4.26		97.8477		75.7708	0.0678606	13.2451	1.34904	0.113748	0.121107	0.75781	4.22085	4.3537		100			n.d.	n.d.	110.2	71	23.2	145	19.8	n.d.	460	29	60	n.d.	n.d.	n.d.	n.d.	n.d.	n.d.	n.d.	n.d.
SAVP	16	T	Kolumbo		Kolumbo	74.25	0.0818	13.18	1.32	0.0996	0.0651	0.7611	4.2	4.21		98.1676		75.636	0.0833269	13.426	1.34464	0.101459	0.0663152	0.775307	4.2784	4.28858		100			24.766	5.62792	118.461	72.9662	23.8614	134.562	19.1658	2.15155	471.168	33.4161	70.2952	5.75506	19.1755	3.34962	0.50439	2.94863	0.511601	3.2475	0.707419
SAVP	16	T	Kolumbo		Kolumbo	74.18	0.086	13.17	1.35	0.1159	0.0489	0.7314	4.29	4.11		98.0822		75.6304	0.0876816	13.4275	1.3764	0.118166	0.0498561	0.745701	4.37388	4.19036		100			28.4471	5.34706	121.509	66.535	22.4343	142.996	19.6344	2.25373	471.213	27.9056	64.782	5.39908	18.1325	3.15928	0.476519	2.7625	0.479542	3.12745	0.685498
SAVP	16	T	Kolumbo		Kolumbo	73.16	0.0584	12.95	1.2459	0.1003	0.0704	0.7518	4.06	4.08		96.4768		75.8317	0.0605327	13.4229	1.2914	0.103963	0.0729709	0.779255	4.20827	4.229		100			20.7994	5.73283	105.789	60.3336	21.56	125.049	18.3575	2.1503	439.829	24.9965	52.5625	4.7992	16.16	2.89589	0.422525	2.57864	0.455919	2.97885	0.651136
SAVP	16	T	Kolumbo		Kolumbo	74.45	0.0473	13.25	1.2674	0.0879	0.0782	0.7313	4.14	4.15		98.2021		75.813	0.048166	13.4926	1.2906	0.0895093	0.0796317	0.744689	4.2158	4.22598		100			n.d.	n.d.	110.3	72	23.4	146	19.8	n.d.	458	31	59	n.d.	n.d.	n.d.	n.d.	n.d.	n.d.	n.d.	n.d.
SAVP	16	T	Kolumbo		Kolumbo	74.03	0.0497	13.09	1.2177	0.1166	0.0776	0.7205	4.25	4.16		97.7121		75.7634	0.0508637	13.3965	1.24621	0.11933	0.079417	0.73737	4.34951	4.25741		100			12.7589	22.4398	57.9151	334.162	23.2701	99.568	11.7844	1.10289	292.895	22.9911	44.5794	5.09598	19.1674	3.75832	0.922266	3.54068	0.583456	3.61076	0.764917
SAVP	16	T	Kolumbo		Kolumbo	74.04	0.0761	13.06	1.2688	0.1185	0.0466	0.735	4.2	4.2		97.745		75.7481	0.0778556	13.3613	1.29807	0.121234	0.0476751	0.751957	4.29689	4.29689		100			11.5189	19.7842	37.22	553.952	25.2884	159.548	10.2669	0.549133	367.12	17.3266	35.7038	4.35777	17.7955	3.96394	1.19522	3.96528	0.639399	3.92132	0.828724
SAVP	16	T	Kolumbo		Kolumbo	72.43	0.0605	12.9	1.2669	0.1231	0.0544	0.7142	3.9	4		95.4491		75.8834	0.0633846	13.5151	1.3273	0.128969	0.0569937	0.748252	4.08595	4.19072		100			7.62316	25.1957	22.5801	472.465	19.9564	77.4185	6.36723	0.532981	173.471	16.5167	34.0673	4.19569	17.0575	3.51949	1.05402	3.48257	0.532329	3.30598	0.676
SAVP	16	T	Kolumbo		Kolumbo	74.22	0.0667	13.22	1.2385	0.097	0.0548	0.7106	4.18	4.15		97.9376		75.7829	0.0681046	13.4984	1.26458	0.0990427	0.055954	0.725564	4.26802	4.23739		100			n.d.	n.d.	35.8	563	23.2	161	9.7	n.d.	372	18	38	n.d.	n.d.	n.d.	n.d.	n.d.	n.d.	n.d.	n.d.
SAVP	16	T	Kolumbo		Kolumbo	74.23	0.077	13.14	1.2546	0.0997	0.0667	0.7292	4.18	4.15		97.9272		75.8012	0.0786298	13.4181	1.28116	0.10181	0.0681118	0.744635	4.26848	4.23784		100			n.d.	n.d.	35.9	568	23.1	160	9.7	n.d.	379	17	37	n.d.	n.d.	n.d.	n.d.	n.d.	n.d.	n.d.	n.d.
SAVP	16	T	Kolumbo		Kolumbo	72.58	0.0358	12.89	1.1975	0.1049	0.0557	0.7158	3.97	4.07		95.6197		75.9049	0.03744	13.4805	1.25236	0.109705	0.0582516	0.748591	4.15186	4.25645		100			n.d.	n.d.	37.7	561	23.3	163	9.9	n.d.	374	17	38	n.d.	n.d.	n.d.	n.d.	n.d.	n.d.	n.d.	n.d.
SAVP	16	T	Kolumbo		Kolumbo	73.76	0.0709	13.02	1.2784	0.0742	0.0667	0.6975	4.28	4		97.2477		75.8476	0.0729066	13.3885	1.31458	0.0763	0.0685877	0.717241	4.40113	4.11321		100			9.6479	20.892	35.5243	538.559	24.2245	151.098	9.75558	0.509144	357.362	16.5511	34.0752	4.19617	17.1727	3.80537	1.17911	3.81933	0.627964	3.8975	0.820196
SAVP	16	T	Kolumbo		Kolumbo	73.08	0.0627	12.8	1.1983	0.1042	0.0707	0.768	4.27	4.07		96.4239		75.7903	0.0650254	13.2747	1.24274	0.108064	0.0733221	0.796483	4.42836	4.22095		100
SAVP	16	T	Kolumbo		Kolumbo	73.34	0.0661	12.97	1.2656	0.099	0.0706	0.7526	4.22	4.13		96.9139		75.6754	0.0682049	13.383	1.3059	0.102153	0.0728482	0.776566	4.35438	4.26151		100			9.95497	37.3666	49.4558	357.001	38.0895	196.58	13.2123	0.785273	685.446	25.4189	53.3994	6.82496	29.1402	6.56951	1.9807	6.80798	1.06714	6.44153	1.29065
SAVP	16	T	Kolumbo		Kolumbo	73.63	0.0802	13.06	1.2591	0.0997	0.0476	0.7163	3.52	3.96		96.3729		76.4011	0.0832184	13.5515	1.30649	0.103452	0.0493915	0.743259	3.65248	4.10904		100			11.8795	18.1905	70.3247	652.992	20.635	241.91	14.7129	0.948356	1154.7	38.4023	69.884	8.144	30.7591	5.64355	1.60334	4.61183	0.665646	3.59857	0.677975
SAVP	17	M	Kolumbo		Kolumbo	71.91	0.0463	12.81	1.1899	0.1691	0.0593	0.6634	4.33	4.07	0	95.2481		75.4976	0.0486099	13.4491	1.24926	0.177536	0.0622585	0.696497	4.54602	4.27305	0	99.9999			32.14	3.82	160.8	54.49	29.04	129.96	24.66	3.65	581.97	38.39	71.36	7.17	24.42	4.1	0.484	3.74	0.668	3.62	0.914
SAVP	17	M	Kolumbo		Kolumbo	71.7	0.0864	12.76	1.3	0.0477	0.0361	0.6278	4.35	3.97	0	94.8781		75.5707	0.0910642	13.4488	1.37018	0.050275	0.0380488	0.661691	4.58483	4.18432	0	99.9999			29.36	3.03	150.16	51.4	26.55	118.4	22.11	3.75	540.2	34.97	65.28	6.73	22.71	3.86	0.304	3.67	0.558	3.94	0.923
SAVP	17	M	Kolumbo		Kolumbo	71.34	0.0507	12.59	1.1734	0.0853	0.0592	0.6708	4.22	3.98	0	94.1694		75.7571	0.0538391	13.3695	1.24605	0.0905814	0.0628654	0.712333	4.48129	4.22643	0	100
SAVP	17	M	Kolumbo		Kolumbo	70.84	0.064	12.41	1.079	0.0552	0.0387	0.6534	4.42	3.97	0.007	93.5373		75.7345	0.0684219	13.2674	1.15355	0.0590139	0.0413739	0.698545	4.72539	4.2443	0.00748365	100
SAVP	17	M	Kolumbo		Kolumbo	71.42	0.0421	12.87	1.1278	0.0878	0.0308	0.6663	4.12	4.01	0.02	94.3948		75.6609	0.0445999	13.6342	1.19477	0.0930136	0.0326289	0.705865	4.36465	4.24812	0.0211876	100
SAVP	17	M	Kolumbo		Kolumbo	71.51	0.0735	12.57	1.041	0.0854	0.0386	0.6276	4.22	3.94	0.0179	94.1241		75.9742	0.0780884	13.3547	1.10599	0.0907313	0.0410097	0.666779	4.48344	4.18596	0.0190174	99.9999
SAVP	17	M	Kolumbo		Kolumbo	69.17	0.0659	12.28	1.1854	0.0565	0.0553	0.6494	3.96	3.91	0.0314	91.364		75.7082	0.0721291	13.4407	1.29745	0.0618405	0.0605271	0.710783	4.33431	4.27958	0.034368	99.9999
SAVP	17	M	Kolumbo		Kolumbo	71.3	0.0288	12.66	1.1615	0.0991	0.0522	0.6706	4.33	4.03	0.0016	94.3339		75.5826	0.0305299	13.4204	1.23126	0.105052	0.0553354	0.710879	4.59008	4.27206	0.0016961	99.9999
SAVP	17	M	Kolumbo		Kolumbo	71.85	0.0584	12.81	1.2392	0.1402	0.0571	0.6504	4.32	4.11	0.0372	95.2725		75.4153	0.0612979	13.4456	1.30069	0.147157	0.0599333	0.682673	4.53436	4.31394	0.0390459	100
SAVP	17	M	Kolumbo		Kolumbo	71	0.0541	12.54	1.2271	0.1005	0.036	0.6517	4.01	3.98	0	93.5995		75.8551	0.0577995	13.3975	1.31101	0.107372	0.0384617	0.696264	4.28421	4.25216	0	99.9999
SAVP	17	M	Kolumbo		Kolumbo	69.24	0.056	12.17	1.1851	0.0941	0.0425	0.6822	4.13	3.91	0.0335	91.5434		75.6363	0.0611732	13.2942	1.29458	0.102793	0.0464261	0.74522	4.51152	4.2712	0.0365947	100
SAVP	17	M	Kolumbo		Kolumbo	71.86	0.0444	12.74	1.1149	0.0488	0.0553	0.6464	4.22	4.06	0	94.7898		75.8098	0.0468405	13.4403	1.17618	0.0514823	0.0583396	0.68193	4.45196	4.28316	0	100
SAVP	17	M	Kolumbo		Kolumbo	69.72	0.0593	12.51	1.2342	0.1111	0.0677	0.6692	4.08	3.98	0.0168	92.4484		75.415	0.0641439	13.5319	1.33501	0.120175	0.07323	0.723863	4.41327	4.3051	0.0181723	99.9999
SAVP	17	M	Kolumbo		Kolumbo	71.43	0.0805	12.78	1.1234	0.0488	0.0379	0.6752	4.23	3.95	0.0125	94.3683		75.6928	0.0853041	13.5427	1.19044	0.0517123	0.0401618	0.715495	4.48244	4.18573	0.013246	100
SAVP	17	M	Kolumbo		Kolumbo	73.23	0.0358	13.23	1.2668	0.1531	0.0716	0.7217	4.4	3.95	0.0022	97.0613		75.4472	0.0368839	13.6306	1.30515	0.157735	0.0737678	0.743551	4.53322	4.06959	0.00226661	99.9999			26.55	2.92	133.52	48.73	23.01	106.06	19.73	3.24	483.28	30.88	56.8	5.81	20.91	3.5	0.395	3.2	0.538	3.64	0.749
SAVP	17	M	Kolumbo		Kolumbo	73.2	0.0641	13.21	1.42	0.1374	0.0544	0.7082	4.62	3.93	0.0282	97.3723		75.1754	0.0658298	13.5665	1.45832	0.141108	0.055868	0.727312	4.74468	4.03606	0.028961	100			30.6	3.34	135.75	49.94	24.15	110.74	20.87	3.4	507.41	31.99	60.53	6.18	20.78	3.87	0.493	3.07	0.472	3.68	0.795
SAVP	17	M	Kolumbo		Kolumbo	72.81	0.0482	12.85	1.1407	0.1017	0.0542	0.7139	4.49	3.99	0.0287	96.2274		75.6645	0.0500897	13.3538	1.18542	0.105687	0.0563249	0.741888	4.66603	4.14643	0.0298252	100			30.13	2.97	134.18	44.03	23.7	106.3	20.21	3.18	490.87	31.76	59.37	6.1	20.82	3.43	0.393	3.41	0.619	3.3	0.767
SAVP	17	M	Kolumbo		Kolumbo	73.79	0.0793	13.12	1.29	0.0409	0.0381	0.7333	4.51	3.96	0.0325	97.5942		75.609	0.0812548	13.4434	1.3218	0.0419082	0.0390392	0.751377	4.62118	4.05762	0.0333012	99.9999
SAVP	17	M	Kolumbo		Kolumbo	73.75	0.0463	12.98	1.33	0.0923	0.0716	0.7357	4.46	3.9	0.019	97.385		75.7303	0.0475433	13.3285	1.36571	0.0947785	0.0735226	0.755455	4.57976	4.00472	0.0195102	99.9999
SAVP	17	M	Kolumbo		Kolumbo	72.86	0.0808	12.95	1.32	0.118	0.0407	0.7246	4.51	4.02	0.0049	96.6291		75.4017	0.0836187	13.4018	1.36605	0.122116	0.0421198	0.749878	4.66733	4.16024	0.00507094	99.9999
SAVP	17	M	Kolumbo		Kolumbo	72.7	0.0748	12.82	1.1916	0.0509	0.0419	0.6843	4.4	3.92	0	95.8836		75.8211	0.0780113	13.3704	1.24276	0.0530852	0.0436988	0.713678	4.5889	4.08829	0	99.9999
SAVP	17	M	Kolumbo		Kolumbo	72.71	0.0796	13.13	1.2682	0.0922	0.0651	0.7607	4.39	4.04	0.0092	96.5451		75.312	0.0824485	13.5999	1.31358	0.0954994	0.0674296	0.787922	4.5471	4.18457	0.00952923	99.9999
SAVP	17	M	Kolumbo		Kolumbo	72.45	0.0887	12.87	1.43	0.1231	0.0601	0.6413	4.47	4.16	0.0032	96.2964		75.2365	0.0921114	13.365	1.485	0.127834	0.0624115	0.665965	4.64192	4.32	0.00332307	100
SAVP	17	M	Kolumbo		Kolumbo	73.04	0.0544	13.11	1.1	0.1128	0.0676	0.7329	4.59	3.94	0.0043	96.7521		75.4919	0.0562262	13.5501	1.13693	0.116587	0.0698693	0.757503	4.74408	4.07226	0.00444435	99.9999
SAVP	17	M	Kolumbo		Kolumbo	72.87	0.0741	13.09	1.1167	0.1093	0.0585	0.7219	4.35	3.99	0.0336	96.4142		75.5802	0.0768559	13.5768	1.15823	0.113365	0.0606757	0.748749	4.51178	4.13839	0.0348496	99.9999
SAVP	17	M	Kolumbo		Kolumbo	72.48	0.0525	13.08	1.31	0.0901	0.0381	0.7515	4.79	3.93	0.0016	96.5239		75.0902	0.0543907	13.551	1.35718	0.0933448	0.0394721	0.778564	4.9625	4.07153	0.00165762	99.9999
SAVP	17	M	Kolumbo		Kolumbo	71.79	0.0822	12.94	1.2527	0.1149	0.0614	0.758	4.37	4.05	0	95.4193		75.2364	0.0861461	13.5612	1.31284	0.120416	0.0643476	0.794389	4.57979	4.24442	0	99.9999
SAVP	17	M	Kolumbo		Kolumbo	72.6	0.0557	13.12	1.2599	0.0713	0.0206	0.7313	4.34	4.1	0.0097	96.3085		75.3828	0.057835	13.6229	1.30819	0.0740329	0.0213896	0.759331	4.50635	4.25715	0.0100718	100
SAVP	17	M	Kolumbo		Kolumbo	72.75	0.0637	13.21	1.37	0.1377	0.0652	0.7145	4.44	4.01	0.0141	96.7753		75.1741	0.0658226	13.6502	1.41565	0.142288	0.0673726	0.738308	4.58795	4.14362	0.0145698	99.9999
SAVP	1		Santorini	Z-2	Minoan	68.25	0.34	12.59	1.51	0.05	0.37	1.58	5.11	3.22	0.02	93.04		73.3555	0.365434	13.5318	1.62296	0.0537403	0.397678	1.69819	5.49226	3.46088	0.0214961	100
SAVP	1		Santorini	Z-2	Minoan	68.96	0.3	13.13	1.57	0.05	0.43	1.76	5.17	3.32	0.02	94.71		72.8117	0.316756	13.8634	1.65769	0.0527927	0.454018	1.8583	5.45877	3.50544	0.0211171	100
SAVP	1		Santorini	Z-2	Minoan	69.2	0.27	13.2	2	0.1	0.4	1.5	4.6	3.6	0.09	94.96		72.8728	0.28433	13.9006	2.10615	0.105307	0.42123	1.57961	4.84414	3.79107	0.0947767	100
SAVP	1		Santorini	Z-2	Minoan	66.5	0.5	15	3.6	0.1	0.7	2	4.45	2.95	0.1	95.9		69.3431	0.521376	15.6413	3.75391	0.104275	0.729927	2.08551	4.64025	3.07612	0.104275	100
SAVP	2	T	Santorini	Z-2	Minoan	70.6	0.26	13.6	1.74		0.24	1.35	5.07	3.12		95.98		73.557	0.27089	14.1696	1.81288	0	0.250052	1.40654	5.28235	3.25068		100
SAVP	2	M	Santorini	Z-2	Minoan	72.5	0.26	13.7	1.9		0.26	1.3	4.9	3.1		97.92		74.04	0.265523	13.991	1.94036	0	0.265523	1.32761	5.00408	3.16585		100
SAVP	3	M	Santorini	Z-2	Minoan	73.36	0.32	14.27	2.09	0.06	0.29	0.29	4.79	3.37		98.84		74.221	0.323756	14.4375	2.11453	0.0607042	0.293403	0.293403	4.84622	3.40955		100
SAVP	3	M	Santorini	Z-2	Minoan	73.49	0.32	14.2	2.07	0.07	0.28	1.38	4.82	3.41		100.04		73.4606	0.319872	14.1943	2.06917	0.069972	0.279888	1.37945	4.81807	3.40864		100
SAVP	3	M	Santorini	Z-2	Minoan	73.67	0.31	14	2.12	0.06	0.31	1.38	4.65	3.5		100		73.67	0.31	14	2.12	0.06	0.31	1.38	4.65	3.5		100
SAVP	3	M	Santorini	Z-2	Minoan	74.52	0.28	13.67	1.98	0.07	0.29	1.33	4.37	3.48		99.99		74.5275	0.280028	13.6714	1.9802	0.070007	0.290029	1.33013	4.37044	3.48035		100
SAVP	3	M	Santorini	Z-2	Minoan	73.57	0.31	14.29	2.07	0.05	0.28	1.39	4.67	3.37		100		73.57	0.31	14.29	2.07	0.05	0.28	1.39	4.67	3.37		100
SAVP	3	M	Santorini	Z-2	Minoan	73.42	0.33	14.24	2.05	0.05	0.3	1.46	4.72	3.41		99.98		73.4347	0.330066	14.2428	2.05041	0.05001	0.30006	1.46029	4.72094	3.41068		100
SAVP	3	M	Santorini	Z-2	Minoan	74.04	0.26	14.17	1.94	0.06	0.29	1.3	4.58	3.36		100		74.04	0.26	14.17	1.94	0.06	0.29	1.3	4.58	3.36		100
SAVP	3	M	Santorini	Z-2	Minoan	73.75	0.29	14.23	1.99	0.07	0.3	1.36	4.6	3.41		100		73.75	0.29	14.23	1.99	0.07	0.3	1.36	4.6	3.41		100
SAVP	3	M	Santorini	Z-2	Minoan	73.92	0.26	14.31	1.94	0.07	0.3	1.33	4.52	3.35		100		73.92	0.26	14.31	1.94	0.07	0.3	1.33	4.52	3.35		100
SAVP	3	M	Santorini	Z-2	Minoan	73.5	0.33	14.32	2.11	0.05	0.3	1.43	4.72	3.25		100.01		73.4927	0.329967	14.3186	2.10979	0.049995	0.29997	1.42986	4.71953	3.24968		100
SAVP	3	M	Santorini	Z-2	Minoan	73.61	0.31	14.26	1.97	0.07	0.29	1.39	4.7	3.4		100		73.61	0.31	14.26	1.97	0.07	0.29	1.39	4.7	3.4		100
SAVP	3	M	Santorini	Z-2	Minoan	73.45	0.32	14.16	2.12	0.06	0.31	1.44	4.74	3.39		99.99		73.4573	0.320032	14.1614	2.12021	0.060006	0.310031	1.44014	4.74047	3.39034		100
SAVP	3	M	Santorini	Z-2	Minoan	73.34	0.33	14.28	2.11	0.09	0.3	1.45	4.78	3.33		100.01		73.3327	0.329967	14.2786	2.10979	0.089991	0.29997	1.44986	4.77952	3.32967		100
SAVP	3	M	Santorini	Z-2	Minoan	73.4	0.32	14.38	2.02	0.04	0.32	1.4	4.79	3.31		99.98		73.4147	0.320064	14.3829	2.0204	0.040008	0.320064	1.40028	4.79096	3.31066		100
SAVP	3	M	Santorini	Z-2	Minoan	73.11	0.33	14.46	2.03	0.06	0.29	1.46	4.85	3.4		99.99		73.1173	0.330033	14.4614	2.0302	0.060006	0.290029	1.46015	4.85049	3.40034		100
SAVP	3	M	Santorini	Z-2	Minoan	73.72	0.31	14.2	2.06	0.06	0.28	1.38	4.68	3.31		100		73.72	0.31	14.2	2.06	0.06	0.28	1.38	4.68	3.31		100
SAVP	3	M	Santorini	Z-2	Minoan	73.87	0.29	14.09	2.02	0.07	0.3	1.35	4.62	3.4		100.01		73.8626	0.289971	14.0886	2.0198	0.069993	0.29997	1.34987	4.61954	3.39966		100
SAVP	3	M	Santorini	Z-2	Minoan	73.82	0.28	14.61	1.9	0.06	0.29	1.31	4.38	3.35		100		73.82	0.28	14.61	1.9	0.06	0.29	1.31	4.38	3.35		100
SAVP	3	M	Santorini	Z-2	Minoan	73.87	0.29	13.96	2.04	0.06	0.3	1.4	4.58	3.48		99.98		73.8848	0.290058	13.9628	2.04041	0.060012	0.30006	1.40028	4.58092	3.4807		100
SAVP	3	M	Santorini	Z-2	Minoan	74.01	0.3	14.09	1.99	0.06	0.3	1.36	4.47	3.4		99.98		74.0248	0.30006	14.0928	1.9904	0.060012	0.30006	1.36027	4.47089	3.40068		100
SAVP	3	M	Santorini	Z-2	Minoan	73.84	0.28	14.16	1.96	0.08	0.29	1.36	4.64	3.38		99.99		73.8474	0.280028	14.1614	1.9602	0.080008	0.290029	1.36014	4.64046	3.38034		100
SAVP	3	M	Santorini	Z-2	Minoan	73.62	0.32	14.29	1.96	0.06	0.27	1.4	4.76	3.33		100.01		73.6126	0.319968	14.2886	1.9598	0.059994	0.269973	1.39986	4.75952	3.32967		100
SAVP	3	M	Santorini	Z-2	Minoan	73.78	0.29	14.16	1.94	0.04	0.28	1.37	4.75	3.36		99.97		73.8021	0.290087	14.1642	1.94058	0.040012	0.280084	1.37041	4.75143	3.36101		100
SAVP	4	T	Santorini	Z-2	Minoan	70.5	0.44	14.7	3.16	0.1	0.86	2.53	4.63	3.03	0.09	100.04		70.4718	0.439824	14.6941	3.15874	0.09996	0.859656	2.52899	4.62815	3.02879	0.089964	100					86	105	48	291	11		552	25	58
SAVP	4	T	Santorini	Z-2	Minoan	58.5	0.85	17.1	7.34	0.15	3.38	7.28	3.78	1.48	0.12	99.98		58.5117	0.85017	17.1034	7.34147	0.15003	3.38068	7.28146	3.78076	1.4803	0.120024	100					38	227	30	117	6		405	16	39
SAVP	4	T	Santorini	Z-2	Minoan	63.6	0.79	16.3	5.61	0.14	2.02	5	4.25	2.14	0.13	99.98		63.6127	0.790158	16.3033	5.61112	0.140028	2.0204	5.001	4.25085	2.14043	0.130026	100					59	221	34	176	6		583	30	61
SAVP	4	T	Santorini	Z-2	Minoan	58.7	0.83	17.7	7.28	0.15	2.89	6.66	4	1.58	0.16	99.95		58.7294	0.830415	17.7089	7.28364	0.150075	2.89145	6.66333	4.002	1.58079	0.16008	100					42	264	27	121	7		448	23	46
SAVP	4	T	Santorini	Z-2	Minoan	53.7	1.04	17.4	10.2	0.18	4.56	9.02	2.66	1.17	0.09	100.02		53.6893	1.03979	17.3965	10.198	0.179964	4.55909	9.0182	2.65947	1.16977	0.089982	100					33	273	22	98	6		334	19	45
SAVP	5	T	Santorini	Z-2	Minoan	67.8	0.37	13.9	3.19	0.09	0.56	2.3	4.78	2.71	0.05	95.75		70.8094	0.386423	14.517	3.33159	0.0939948	0.584856	2.40209	4.99217	2.83029	0.0522193	100
SAVP	5	T	Santorini	Z-2	Minoan	69.2	0.34	14.1	2.93	0.08	0.47	1.66	4.84	2.93	0.06	96.61		71.6282	0.35193	14.5948	3.03281	0.0828072	0.486492	1.71825	5.00983	3.03281	0.0621054	100
SAVP	5	T	Santorini	Z-2	Minoan	66.4	0.38	14.5	2.92	0.08	0.77	2.58	5.24	2.78	0.09	95.74		69.3545	0.396908	15.1452	3.04993	0.0835596	0.804262	2.6948	5.47316	2.9037	0.0940046	100
SAVP	5	T	Santorini	Z-2	Minoan	66.3	0.41	14.2	3.24	0.08	1.22	2.58	4.99	2.76	0.04	95.82		69.1922	0.427886	14.8195	3.38134	0.0834899	1.27322	2.69255	5.20768	2.8804	0.0417449	100
SAVP	6	T	Santorini	Z-2	Minoan	52.5	1.03	17.7	10.05	0.16	5.28	9.57	2.63	0.96	0.08	99.96		52.521	1.03041	17.7071	10.054	0.160064	5.28211	9.57383	2.63105	0.960384	0.080032	100					29	271	23	86	4		288	20	37
SAVP	6	T	Santorini	Z-2	Minoan	53.7	1.04	17.4	10.2	0.18	4.56	9.02	2.66	1.17	0.09	100.02		53.6893	1.03979	17.3965	10.198	0.179964	4.55909	9.0182	2.65947	1.16977	0.089982	100					33	273	22	98	6		334	19	45
SAVP	6	T	Santorini	Z-2	Minoan	54.2	1.04	17.7	9.48	0.18	4.43	8.53	3.18	1.22	0.11	100.07		54.1621	1.03927	17.6876	9.47337	0.179874	4.4269	8.52403	3.17778	1.21915	0.109923	100					36	287	26	115	6		360	17	35
SAVP	6	T	Santorini	Z-2	Minoan	58.1	0.83	17.3	7.57	0.16	3.55	7.18	3.84	1.27	0.11	99.91		58.1523	0.830748	17.3156	7.57682	0.160144	3.5532	7.18647	3.84346	1.27114	0.110099	100					36	231	28	122	4		349	23	50
SAVP	6	T	Santorini	Z-2	Minoan	58.3	0.84	17.2	7.37	0.16	3.44	7.33	3.78	1.45	0.12	99.99		58.3058	0.840084	17.2017	7.37074	0.160016	3.44034	7.33073	3.78038	1.45015	0.120012	100					39	218	29	116	7		384	15	36
SAVP	6	T	Santorini	Z-2	Minoan	58.5	0.85	17.1	7.34	0.15	3.38	7.28	3.78	1.48	0.12	99.98		58.5117	0.85017	17.1034	7.34147	0.15003	3.38068	7.28146	3.78076	1.4803	0.120024	100					38	227	30	117	6		405	16	39
SAVP	6	T	Santorini	Z-2	Minoan	58.7	0.83	17.7	7.28	0.15	2.89	6.66	4	1.58	0.16	99.95		58.7294	0.830415	17.7089	7.28364	0.150075	2.89145	6.66333	4.002	1.58079	0.16008	100					42	264	27	121	7		448	23	46
SAVP	6	T	Santorini	Z-2	Minoan	59.1	0.9	17.1	7.41	0.15	3.02	6.59	3.86	1.67	0.12	99.92		59.1473	0.900721	17.1137	7.41593	0.15012	3.02242	6.59528	3.86309	1.67134	0.120096	100					51	233	30	126	6		510	26	40
SAVP	6	T	Santorini	Z-2	Minoan	59.7	0.81	16.8	6.19	0.14	3.21	6.61	4.04	1.68	0.11	99.29		60.1269	0.815792	16.9201	6.23426	0.141001	3.23295	6.65727	4.06889	1.69201	0.110787	100					49	219	28	146	7		452	19	52
SAVP	6	T	Santorini	Z-2	Minoan	61.2	0.84	17	6.49	0.16	2.35	5.75	4.24	1.9	0.11	100.04		61.1755	0.839664	16.9932	6.48741	0.159936	2.34906	5.7477	4.2383	1.89924	0.109956	100					54	230	36	144	7		465	27	35
SAVP	6	T	Santorini	Z-2	Minoan	62.5	0.79	16.9	5.89	0.13	2.1	5.29	4.3	1.91	0.15	99.96		62.525	0.790316	16.9068	5.89236	0.130052	2.10084	5.29212	4.30172	1.91076	0.15006	100					53	218	36	167	7		502	24	56
SAVP	6	T	Santorini	Z-2	Minoan	63.6	0.79	16.3	5.31	0.14	2.02	5	4.25	2.14	0.13	99.68		63.8042	0.792536	16.3523	5.32705	0.140449	2.02648	5.01605	4.26364	2.14687	0.130417	100					59	211	34	176	6		583	30	61
SAVP	6	T	Santorini	Z-2	Minoan	67.6	0.54	15.1	4.23	0.09	1.41	3.44	4.71	0.272	0.09	97.482		69.3461	0.553948	15.49	4.33926	0.0923247	1.44642	3.52886	4.83166	0.279026	0.0923247	100					86	136	45	274	9		535	36	38
SAVP	6	T	Santorini	Z-2	Minoan	69.1	0.53	15	3.62	0.08	1.02	2.88	4.82	2.86	0.08	99.99		69.1069	0.530053	15.0015	3.62036	0.080008	1.0201	2.88029	4.82048	2.86029	0.080008	100					96	124	46	295	9		553	29	37
SAVP	6	T	Santorini	Z-2	Minoan	70	0.47	14.8	2.95	0.09	0.91	2.78	4.73	2.93	0.08	99.74		70.1825	0.471225	14.8386	2.95769	0.0902346	0.912372	2.78725	4.74233	2.93764	0.0802085	100					86	107	45	277	11		503	28	63
SAVP	6	T	Santorini	Z-2	Minoan	70.3	0.46	14.8	3.1	0.08	0.85	2.46	4.88	2.98	0.08	99.99		70.307	0.460046	14.8015	3.10031	0.080008	0.850085	2.46025	4.88049	2.9803	0.080008	100					93	102	43	278	8		511	30	51
SAVP	6	T	Santorini	Z-2	Minoan	70.5	0.44	14.7	3.16	0.1	0.86	2.53	4.63	3.03	0.09	100.04		70.4718	0.439824	14.6941	3.15874	0.09996	0.859656	2.52899	4.62815	3.02879	0.089964	100					86	105	48	291	11		552	25	58
SAVP	6	T	Santorini	Z-2	Minoan	70.6	0.46	14.6	3.05	0.08	0.66	2.36	5.08	3	0.08	99.97		70.6212	0.460138	14.6044	3.05092	0.080024	0.660198	2.36071	5.08152	3.0009	0.080024	100					98	103	45	294	10		554	30	40
SAVP	6	T	Santorini	Z-2	Minoan	70.8	0.44	14.7	2.89	0.07	0.64	2.29	5.04	3.03	0.07	99.97		70.8212	0.440132	14.7044	2.89087	0.070021	0.640192	2.29069	5.04151	3.03091	0.070021	100					99	87	47	306	10		573	29	54
SAVP	6	T	Santorini	Z-2	Minoan	70.9	0.47	14.7	3.02	0.07	0.62	2.36	4.78	3.05	0.07	100.04		70.8717	0.469812	14.6941	3.01879	0.069972	0.619752	2.35906	4.77809	3.04878	0.069972	100					98	103	48	312	11		562	30	53
SAVP	6	T	Santorini	Z-2	Minoan	70.9	0.43	14.6	2.82	0.08	0.61	2.22	5.09	3.12	0.08	99.95		70.9355	0.430215	14.6073	2.82141	0.08004	0.610305	2.22111	5.09255	3.12156	0.08004	100					88	96	48	296	11		548	27	51
SAVP	6	T	Santorini	Z-2	Minoan	70.9	0.42	14.4	2.59	0.09	0.77	2.25	5.11	3.12	0.078	99.728		71.0934	0.421146	14.4393	2.59706	0.0902455	0.7721	2.25614	5.12394	3.12851	0.0782127	100					95	96	44	299	10		538	30	59
SAVP	6	T	Santorini	Z-2	Minoan	71.1	0.45	14.5	2.84	0.08	0.65	2.16	5.01	3.07	0.08	99.94		71.1427	0.45027	14.5087	2.84171	0.080048	0.65039	2.1613	5.01301	3.07184	0.080048	100					106	99	49	333	11		576	28	56
SAVP	6	T	Santorini	Z-2	Minoan	71.1	0.43	14.5	2.56	0.07	0.62	2.25	4.93	3.1	0.07	99.63		71.364	0.431597	14.5538	2.56951	0.07026	0.622303	2.25836	4.94831	3.11151	0.07026	100					94	94	45	292	9		532	25	62
SAVP	6	T	Santorini	Z-2	Minoan	71.2	0.41	14.8	2.62	0.07	0.65	2.06	5.04	3.09	0.09	100.03		71.1786	0.409877	14.7956	2.61921	0.069979	0.649805	2.05938	5.03849	3.08907	0.089973	100					106	91	47	320	11		562	24	44
SAVP	6	T	Santorini	Z-2	Minoan	71.2	0.41	14.5	2.82	0.08	0.6	2.21	4.89	3.16	0.08	99.95		71.2356	0.410205	14.5073	2.82141	0.08004	0.6003	2.21111	4.89245	3.16158	0.08004	100					88	98	51	299	10		561	28	51
SAVP	6	T	Santorini	Z-2	Minoan	71.2	0.44	14.4	2.84	0.08	0.56	2.19	5.06	3.1	0.06	99.93		71.2499	0.440308	14.4101	2.84199	0.080056	0.560392	2.19153	5.06354	3.10217	0.060042	100					104	96	51	328	11		573	31	45
SAVP	6	T	Santorini	Z-2	Minoan	71.2	0.43	14.5	2.53	0.08	0.67	2.19	4.97	3.1	0.06	99.73		71.3928	0.431164	14.5393	2.53685	0.0802166	0.671814	2.19593	4.98346	3.10839	0.0601624	100					94	92	45	298	10		509	29	53
SAVP	6	T	Santorini	Z-2	Minoan	71.4	0.41	14.6	2.49	0.08	0.58	2.16	4.93	3.06	0.07	99.78		71.5574	0.410904	14.6322	2.49549	0.0801764	0.581279	2.16476	4.94087	3.06675	0.0701543	100					94	95	47	301	11		542	30	55
SAVP	6	T	Santorini	Z-2	Minoan	71.4	0.42	14.6	2.8	0.08	0.6	2.08	4.49	3.19	0.06	99.72		71.6005	0.421179	14.641	2.80786	0.0802246	0.601685	2.08584	4.50261	3.19896	0.0601685	100					101	95	47	319	10		543	29	34
SAVP	6	T	Santorini	Z-2	Minoan	71.4	0.41	14.4	2.53	0.09	0.59	2.12	4.93	3.13	0.08	99.68		71.6292	0.411316	14.4462	2.53812	0.0902889	0.591894	2.12681	4.94583	3.14005	0.0802568	100					91	85	43	282	10		419	27	52
SAVP	7	L	Santorini	Z-2	Minoan	70.63	0.31	13.55	1.83	0.02	1.43	0.25	1.43	4.91		94.36		74.8516	0.328529	14.3599	1.93938	0.0211954	1.51547	0.264943	1.51547	5.20348		100
SAVP	7	L	Santorini	Z-2	Minoan	71.93	0.16	13.89	1.72	0.06	0.21	1.15	2.9	3.52		95.54		75.2878	0.167469	14.5384	1.80029	0.0628009	0.219803	1.20368	3.03538	3.68432		100
SAVP	7	L	Santorini	Z-2	Minoan	72.73	0.27	13.77	1.98	0.08	0.33	1.37	5	3.09		98.62		73.7477	0.273778	13.9627	2.00771	0.0811194	0.334618	1.38917	5.06997	3.13324		100
SAVP	7	L	Santorini	Z-2	Minoan	73.36	0.34	13.92	2.02	0.06	0.32	1.41	5.01	2.99		99.43		73.7805	0.341949	13.9998	2.03158	0.060344	0.321834	1.41808	5.03872	3.00714		100
SAVP	7	L	Santorini	Z-2	Minoan	72.27	0.32	13.58	2.04	0.01	0.24	1.39	4.74	3.2		97.79		73.9033	0.327232	13.8869	2.0861	0.010226	0.245424	1.42141	4.84712	3.27232		100
SAVP	7	L	Santorini	Z-2	Minoan	72.43	0.23	13.9	2.04	0.04	0.27	1.42	4	3.24		97.57		74.2339	0.235728	14.2462	2.09081	0.0409962	0.276724	1.45537	4.09962	3.32069		100
SAVP	7	L	Santorini	Z-2	Minoan	72.31	0.35	13.8	2.03	0.1	0.3	1.29	5.22	3.15		98.55		73.3739	0.35515	14.003	2.05987	0.101471	0.304414	1.30898	5.2968	3.19635		100
SAVP	7	L	Santorini	Z-2	Minoan	72.15	0.32	13.65	2.05	0.04	0.24	1.29	4.54	3.11		97.39		74.0836	0.328576	14.0158	2.10494	0.041072	0.246432	1.32457	4.66167	3.19335		100
SAVP	7	L	Santorini	Z-2	Minoan	73.08	0.26	13.72	1.9	0.08	0.23	1.29	4.91	3.18		98.65		74.0801	0.263558	13.9078	1.926	0.0810948	0.233147	1.30765	4.97719	3.22352		100
SAVP	7	L	Santorini	Z-2	Minoan	73.34	0.2	14.02	2.08	0	0.31	1.55	4.95	3.31		99.76		73.5164	0.200481	14.0537	2.085	0	0.310746	1.55373	4.96191	3.31796		100
SAVP	7	L	Santorini	Z-2	Minoan	71.75	0.28	13.6	1.94	0.04	0.3	1.4	4.87	3.09		97.27		73.7638	0.287859	13.9817	1.99445	0.0411226	0.30842	1.43929	5.00668	3.17672		100
SAVP	7	L	Santorini	Z-2	Minoan	72.44	0.22	13.9	1.77	0.15	0.23	1.37	4.81	3.32		98.21		73.7603	0.22401	14.1533	1.80226	0.152734	0.234192	1.39497	4.89767	3.38051		100
SAVP	7	L	Santorini	Z-2	Minoan	71.36	0.28	13.77	1.88	0.02	0.26	1.31	4.54	3.22		96.64		73.8411	0.289735	14.2488	1.94536	0.0206954	0.26904	1.35555	4.69785	3.33195		100
SAVP	7	L	Santorini	Z-2	Minoan	72.58	0.32	14.11	2.1	0.09	0.3	1.53	4.9	3.24		99.17		73.1875	0.322678	14.2281	2.11758	0.0907533	0.302511	1.54281	4.94101	3.26712		100
SAVP	7	L	Santorini	Z-2	Minoan	71.93	0.19	13.89	2.03	0.04	0.28	1.45	5.05	3.23		98.09		73.3306	0.1937	14.1605	2.06953	0.0407789	0.285452	1.47823	5.14833	3.29289		100
SAVP	7	L	Santorini	Z-2	Minoan	72.22	0.3	13.49	1.88	0.11	0.24	1.3	4.75	3.17		97.46		74.1022	0.307819	13.8416	1.929	0.112867	0.246255	1.33388	4.87379	3.25262		100
SAVP	7	L	Santorini	Z-2	Minoan	71.87	0.26	13.71	2.06	0.05	0.24	1.45	4.76	3.03		97.43		73.7658	0.266858	14.0716	2.11434	0.0513189	0.246331	1.48825	4.88556	3.10993		100
SAVP	7	L	Santorini	Z-2	Minoan	69.61	0.3	13.23	2.05	0.01	0.27	1.36	4.26	3.02		94.11		73.9666	0.318776	14.058	2.1783	0.0106259	0.286898	1.44512	4.52662	3.20901		100
SAVP	7	L	Santorini	Z-2	Minoan	72.47	0.28	14.06	2.02	0.1	0.32	1.49	4.97	3.19		98.9		73.276	0.283114	14.2164	2.04247	0.101112	0.323559	1.50657	5.02528	3.22548		100
SAVP	7	L	Santorini	Z-2	Minoan	72.17	0.3	14.01	2.02	0	0.27	1.47	4.41	3.25		97.9		73.7181	0.306435	14.3105	2.06333	0	0.275792	1.50153	4.5046	3.31971		100
SAVP	7	L	Santorini	Z-2	Minoan	69.78	0.24	13.28	2.05	0.09	0.24	1.42	4.34	3.02		94.46		73.8725	0.254076	14.0589	2.17023	0.0952784	0.254076	1.50328	4.59454	3.19712		100
SAVP	7	L	Santorini	Z-2	Minoan	71.98	0.22	13.24	1.96	0.06	0.26	1.22	4.77	3.2		96.91		74.2751	0.227015	13.6622	2.0225	0.0619131	0.26829	1.2589	4.92209	3.30203		100
SAVP	7	L	Santorini	Z-2	Minoan	69.61	0.29	13.46	1.84	0.14	0.23	1.34	4.06	3.11		94.08		73.9902	0.308248	14.307	1.95578	0.14881	0.244473	1.42432	4.31548	3.3057		100
SAVP	7	L	Santorini	Z-2	Minoan	72.63	0.22	13.6	1.92	0.09	0.29	1.31	5	3.14		98.2		73.9613	0.224033	13.8493	1.95519	0.0916497	0.295316	1.33401	5.09165	3.19756		100
SAVP	7	L	Santorini	Z-2	Minoan	71.33	0.29	13.58	2.06	0.09	0.29	1.53	4.32	3.21		96.7		73.7642	0.299897	14.0434	2.1303	0.0930714	0.299897	1.58221	4.46743	3.31954		100
SAVP	7	L	Santorini	Z-2	Minoan	71.08	0.34	13.47	1.83	0.07	0.26	1.34	4.5	3.24		96.13		73.9415	0.353688	14.0123	1.90367	0.0728181	0.270467	1.39395	4.68116	3.37044		100
SAVP	7	L	Santorini	Z-2	Minoan	72.33	0.28	13.5	1.91	0.07	0.21	1.3	4.71	3.31		97.62		74.0934	0.286826	13.8291	1.95657	0.0717066	0.21512	1.33169	4.82483	3.3907		100
SAVP	7	L	Santorini	Z-2	Minoan	70.52	0.27	13.25	2.07	0.03	0.33	1.34	4.4	3.05		95.26		74.029	0.283435	13.9093	2.173	0.0314928	0.34642	1.40668	4.61894	3.20176		100
SAVP	7	L	Santorini	Z-2	Minoan	72.79	0.4	13.79	2.13	0.05	0.27	1.44	4.74	3.14		98.75		73.7114	0.405063	13.9646	2.15696	0.0506329	0.273418	1.45823	4.8	3.17975		100
SAVP	7	L	Santorini	Z-2	Minoan	73.34	0.21	13.84	2.07	0.07	0.24	1.32	4.94	3.34		99.37		73.805	0.211331	13.9277	2.08312	0.0704438	0.241522	1.32837	4.97132	3.36118		100
SAVP	7	L	Santorini	Z-2	Minoan	73.06	0.28	14.32	2.24	0.07	0.34	1.44	5.18	3.27		100.2		72.9142	0.279441	14.2914	2.23553	0.0698603	0.339321	1.43713	5.16966	3.26347		100
SAVP	7	L	Santorini	Z-2	Minoan	70.37	0.29	13.43	2.07	0.06	0.25	1.36	4.54	3.05		95.42		73.7476	0.30392	14.0746	2.16936	0.0628799	0.262	1.42528	4.75791	3.19639		100
SAVP	7	L	Santorini	Z-2	Minoan	72.01	0.28	13.61	1.86	0.02	0.25	1.2	4.8	3.05		97.08		74.1759	0.288422	14.0194	1.91595	0.0206016	0.25752	1.23609	4.94438	3.14174		100
SAVP	7	L	Santorini	Z-2	Minoan	71.82	0.41	14.09	2.15	0.09	0.27	1.44	4.77	3		98.04		73.2558	0.418197	14.3717	2.19298	0.0917993	0.275398	1.46879	4.86536	3.05998		100
SAVP	7	L	Santorini	Z-2	Minoan	69.03	0.26	13.16	2.04	0.07	0.25	1.36	4.21	3.14		93.52		73.8131	0.278015	14.0719	2.18135	0.0748503	0.267322	1.45423	4.50171	3.35757		100
SAVP	7	L	Santorini	Z-2	Minoan	72.45	0.22	13.74	2.03	0.06	0.32	1.41	5.18	3.37		98.78		73.3448	0.222717	13.9097	2.05507	0.060741	0.323952	1.42741	5.24398	3.41162		100
SAVP	7	L	Santorini	Z-2	Minoan	72.25	0.31	13.71	1.94	0.03	0.26	1.31	4.77	3.15		97.73		73.9282	0.3172	14.0284	1.98506	0.0306968	0.266039	1.34043	4.88079	3.22317		100
SAVP	7	L	Santorini	Z-2	Minoan	72.87	0.2	13.78	1.87	0.05	0.27	1.38	2.47	3.34		96.23		75.7248	0.207835	14.3199	1.94326	0.0519588	0.280578	1.43406	2.56677	3.47085		100
SAVP	7	L	Santorini	Z-2	Minoan	71.7	0.24	13.56	2.1	0.11	0.33	1.35	4.79	3.18		97.36		73.6442	0.246508	13.9277	2.15694	0.112983	0.338948	1.38661	4.91988	3.26623		100
SAVP	7	L	Santorini	Z-2	Minoan	71.95	0.33	13.75	1.89	0.06	0.29	1.47	5.04	3.18		97.96		73.4483	0.336872	14.0363	1.92936	0.0612495	0.296039	1.50061	5.14496	3.24622		100
SAVP	7	L	Santorini	Z-2	Minoan	71.02	0.32	13.54	2.11	0.03	0.25	1.42	4.79	3.3		96.78		73.3829	0.330647	13.9905	2.1802	0.0309981	0.258318	1.46725	4.94937	3.4098		100
SAVP	7	L	Santorini	Z-2	Minoan	72.31	0.3	13.83	2.15	0.01	0.28	1.35	4.9	3		98.13		73.688	0.305717	14.0935	2.19097	0.0101906	0.285336	1.37573	4.99338	3.05717		100
SAVP	7	L	Santorini	Z-2	Minoan	72.67	0.17	13.84	2.02	0.13	0.27	1.34	5.05	3.18		98.67		73.6495	0.172291	14.0266	2.04723	0.131752	0.273639	1.35806	5.11807	3.22286		100
SAVP	7	L	Santorini	Z-2	Minoan	71.6	0.31	13.7	1.97	0.04	0.28	1.39	4.91	3		97.2		73.6626	0.31893	14.0947	2.02675	0.0411523	0.288066	1.43004	5.05144	3.08642		100
SAVP	7	L	Santorini	Z-2	Minoan	72.3	0.31	13.75	2.11	0.08	0.29	1.37	5.07	3.14		98.42		73.4607	0.314977	13.9707	2.14387	0.0812843	0.294656	1.39199	5.15139	3.19041		100
SAVP	7	L	Santorini	Z-2	Minoan	70.94	0.27	13.72	2.1	0.1	0.28	1.39	4.84	2.97		96.61		73.4293	0.279474	14.2014	2.17369	0.103509	0.289825	1.43877	5.00983	3.07422		100
SAVP	7	L	Santorini	Z-2	Minoan	72.13	0.32	13.83	2.12	0.06	0.27	1.4	4.83	3.17		98.13		73.5045	0.326098	14.0935	2.1604	0.0611434	0.275145	1.42668	4.92204	3.23041		100
SAVP	7	L	Santorini	Z-2	Minoan	71.47	0.3	13.98	2.06	0.1	0.26	1.53	5.13	3.06		97.89		73.0105	0.306466	14.2813	2.1044	0.102155	0.265604	1.56298	5.24058	3.12596		100
SAVP	7	L	Santorini	Z-2	Minoan	71.69	0.3	13.37	1.81	0.03	0.25	1.22	4.77	3.39		96.83		74.037	0.309821	13.8077	1.86926	0.0309821	0.258184	1.25994	4.92616	3.50098		100
SAVP	7	L	Santorini	Z-2	Minoan	70.53	0.34	13.33	1.88	0.06	0.28	1.37	4.58	2.91		95.28		74.0239	0.356843	13.9903	1.97313	0.0629723	0.293871	1.43787	4.80688	3.05416		100
SAVP	7	L	Santorini	Z-2	Minoan	73.51	0.27	13.92	1.95	0.12	0.29	1.31	4.99	3.26		99.62		73.7904	0.27103	13.9731	1.95744	0.120458	0.291106	1.315	5.00903	3.27244		100
SAVP	7	L	Santorini	Z-2	Minoan	71.21	0.3	13.78	2.04	0	0.3	1.45	4.68	3.04		96.8		73.564	0.309917	14.2355	2.10744	0	0.309917	1.49793	4.83471	3.1405		100
SAVP	7	L	Santorini	Z-2	Minoan	73.34	0.34	13.7	1.98	0.05	0.24	1.2	5.08	3.21		99.14		73.9762	0.342949	13.8188	1.99718	0.0504337	0.242082	1.21041	5.12407	3.23785		100
SAVP	7	L	Santorini	Z-2	Minoan	72	0.28	13.65	2.05	0.1	0.25	1.39	4.93	3.04		97.69		73.7025	0.286621	13.9728	2.09847	0.102365	0.255912	1.42287	5.04658	3.11188		100
SAVP	7	L	Santorini	Z-2	Minoan	70.9	0.29	13.53	1.96	0.04	0.23	1.47	4.57	3.09		96.08		73.7927	0.301832	14.082	2.03997	0.041632	0.239384	1.52998	4.75645	3.21607		100
SAVP	7	L	Santorini	Z-2	Minoan	72.15	0.3	13.87	1.83	0.02	0.28	1.28	4.84	3.21		97.78		73.7881	0.306811	14.1849	1.87155	0.0204541	0.286357	1.30906	4.94989	3.28288		100
SAVP	7	L	Santorini	Z-2	Minoan	72.36	0.32	14.05	2.18	0.05	0.22	1.49	3.05	3.2		96.92		74.6595	0.330169	14.4965	2.24928	0.0515889	0.226991	1.53735	3.14693	3.30169		100
SAVP	7	L	Santorini	Z-2	Minoan	71.8	0.23	13.59	2.07	0.1	0.3	1.37	4.85	3.08		97.39		73.7242	0.236164	13.9542	2.12547	0.10268	0.30804	1.40672	4.97998	3.16254		100
SAVP	7	L	Santorini	Z-2	Minoan	69.82	0.38	14	2.18	0.04	0.37	1.69	4.97	3.03		96.48		72.3673	0.393864	14.5108	2.25954	0.0414594	0.383499	1.75166	5.15133	3.14055		100
SAVP	7	L	Santorini	Z-2	Minoan	70.03	0.33	13.25	2.05	0.11	0.3	1.34	4.23	3.15		94.79		73.8791	0.348138	13.9783	2.16268	0.116046	0.316489	1.41365	4.4625	3.32314		100
SAVP	7	L	Santorini	Z-2	Minoan	71.8	0.3	13.75	2.01	0.06	0.26	1.43	5.12	3.1		97.83		73.3926	0.306654	14.055	2.05458	0.0613309	0.265767	1.46172	5.23357	3.16876		100
SAVP	7	L	Santorini	Z-2	Minoan	72	0.27	13.23	1.66	0.03	0.16	1.2	4.83	3.31		96.69		74.4648	0.279243	13.6829	1.71683	0.031027	0.165477	1.24108	4.99535	3.42331		100
SAVP	7	L	Santorini	Z-2	Minoan	72.11	0.28	13.68	2.15	0.11	0.3	1.4	4.52	3.16		97.71		73.8	0.286562	14.0006	2.20039	0.112578	0.307031	1.43281	4.62593	3.23406		100
SAVP	7	L	Santorini	Z-2	Minoan	71.9	0.22	13.74	1.88	0.08	0.24	1.36	4.89	3.12		97.43		73.7966	0.225803	14.1024	1.92959	0.0821102	0.246331	1.39587	5.01899	3.2023		100
SAVP	7	L	Santorini	Z-2	Minoan	72.11	0.31	13.96	2.08	0.05	0.32	1.34	5.04	3.07		98.28		73.372	0.315425	14.2043	2.1164	0.0508751	0.3256	1.36345	5.12821	3.12373		100
SAVP	7	L	Santorini	Z-2	Minoan	72.04	0.26	13.65	1.97	0.17	0.29	1.29	4.81	3.12		97.6		73.8115	0.266393	13.9857	2.01844	0.17418	0.297131	1.32172	4.92828	3.19672		100
SAVP	7	L	Santorini	Z-2	Minoan	72.62	0.26	13.54	1.82	0.09	0.24	1.34	5.1	3.09		98.1		74.0265	0.265036	13.8022	1.85525	0.0917431	0.244648	1.36595	5.19878	3.14985		100
SAVP	7	L	Santorini	Z-2	Minoan	72.49	0.21	13.5	1.86	0.14	0.2	1.11	4.97	3.17		97.65		74.2345	0.215054	13.8249	1.90476	0.143369	0.204813	1.13671	5.08961	3.24629		100
SAVP	9	M	Santorini	Z-2	Minoan	74.51	0.3	13.74	2.09	0.08	0.3	1.41	4.29	3.25	0	99.97		74.5324	0.30009	13.7441	2.09063	0.080024	0.30009	1.41042	4.29129	3.25098	0	100				9.15	122.07	62.69	41.48	308.24	10.5	3.38	517.99	0.66	59.41	6.55	24.12	5.42	0.83	5.61	0.95	6.45	1.41
SAVP	10	M	Santorini	Z-2	Minoan	72.05	0.29	13.43	2.03	0.07	0.3	1.45	4.91	3.17	0.04	97.74		73.716	0.296706	13.7405	2.07694	0.0716186	0.306937	1.48353	5.02353	3.2433	0.0409249	100
SAVP	12	L	Santorini	Z-2	Minoan	74.11	0.4	14.04	1.82	0.12	0.23	1.22	4.4	3.42	0	99.76		74.2883	0.400962	14.0738	1.82438	0.120289	0.230553	1.22294	4.41059	3.42823	0	100			24.2461	6.99354	96.06	75.97	42.7532	299.144	11.0412	2.88843	522.755	28.1474	54.4454	6.40987	23.615	5.30135	0.858005	5.64645	0.953482	6.36417	1.38885
SAVP	12	L	Santorini	Z-2	Minoan	73.24	0.31	14.04	2.15	0.08	0.27	1.4	4.73	3.43	0	99.65		73.4972	0.311089	14.0893	2.15755	0.080281	0.270948	1.40492	4.74661	3.44205	0	100
SAVP	12	L	Santorini	Z-2	Minoan	73.68	0.31	14.31	2.13	0	0.28	1.44	4.22	3.37	0	99.74		73.8721	0.310808	14.3473	2.13555	0	0.28073	1.44375	4.231	3.37878	0	100
SAVP	12	L	Santorini	Z-2	Minoan	73.47	0.3	14.29	1.96	0	0.31	1.52	4.39	3.44	0	99.68		73.7059	0.300963	14.3359	1.96629	0	0.310995	1.52488	4.40409	3.45104	0	100
SAVP	12	L	Santorini	Z-2	Minoan	73.23	0.19	14.32	1.88	0	0.27	1.49	4.84	3.48	0	99.7		73.4504	0.190572	14.3631	1.88566	0	0.270812	1.49448	4.85456	3.49047	0	100
SAVP	12	L	Santorini	Z-2	Minoan	73.4	0.48	14.23	1.86	0	0.37	1.32	4.53	3.61	0	99.8		73.5471	0.480962	14.2585	1.86373	0	0.370741	1.32265	4.53908	3.61723	0	100
SAVP	12	L	Santorini	Z-2	Minoan	73.61	0.23	14.3	1.91	0	0.25	1.14	4.75	3.5	0	99.69		73.8389	0.230715	14.3445	1.91594	0	0.250777	1.14354	4.76477	3.51088	0	100
SAVP	12	L	Santorini	Z-2	Minoan	73.12	0.26	14.5	2.07	0	0.33	1.63	4.55	3.3	0	99.76		73.2959	0.260626	14.5349	2.07498	0	0.330794	1.63392	4.56095	3.30794	0	100
SAVP	12	L	Santorini	Z-2	Minoan	73.99	0.2	13.99	1.75	0	0.19	1.34	4.62	3.58	0	99.66		74.2424	0.200682	14.0377	1.75597	0	0.190648	1.34457	4.63576	3.59221	0	100
SAVP	12	L	Santorini	Z-2	Minoan	73.47	0.18	14.27	2.15	0.08	0.34	1.38	4.55	3.29	0.08	99.79		73.6246	0.180379	14.3	2.15452	0.0801684	0.340716	1.3829	4.55958	3.29692	0.0801684	100
SAVP	12	L	Santorini	Z-2	Minoan	72.5	0.34	14.25	1.9	0	0.37	2.23	4.54	3.38	0.26	99.77		72.6671	0.340784	14.2829	1.90438	0	0.370853	2.23514	4.55047	3.38779	0.260599	100
SAVP	12	L	Santorini	Z-2	Minoan	69.44	0.81	14.85	4.31	0.16	0.49	2.35	3.88	3.59	0	99.88		69.5234	0.810973	14.8678	4.31518	0.160192	0.490589	2.35282	3.88466	3.59431	0	100
SAVP	12	L	Santorini	Z-2	Minoan	69.11	0.78	15.75	3.38	0	0.45	2.03	4.41	3.9	0	99.81		69.2416	0.781485	15.78	3.38643	0	0.450857	2.03386	4.41839	3.90742	0	100
SAVP	12	L	Santorini	Z-2	Minoan	73.32	0.18	14.49	1.93	0	0.39	1.43	4.67	3.35	0	99.76		73.4964	0.180433	14.5249	1.93464	0	0.390938	1.43344	4.68123	3.35806	0	100
SAVP	12	L	Santorini	Z-2	Minoan	72.87	0.42	14.11	1.93	0.11	0.39	1.5	4.87	3.51	0	99.71		73.0819	0.421222	14.151	1.93561	0.11032	0.391134	1.50436	4.88416	3.52021	0	100
SAVP	12	L	Santorini	Z-2	Minoan	73.87	0.27	14.26	2.03	0.06	0.24	1.25	4.38	3.42	0	99.78		74.0329	0.270595	14.2914	2.03448	0.0601323	0.240529	1.25276	4.38966	3.42754	0	100
SAVP	12	L	Santorini	Z-2	Minoan	74.19	0.2	14.1	1.92	0.08	0.24	1.13	4.32	3.56	0	99.74		74.3834	0.200521	14.1368	1.92501	0.0802085	0.240626	1.13295	4.33126	3.56928	0	100
SAVP	12	L	Santorini	Z-2	Minoan	72.58	0.43	14.38	2.26	0.18	0.31	1.31	4.81	3.48	0	99.74		72.7692	0.431121	14.4175	2.26589	0.180469	0.310808	1.31341	4.82254	3.48907	0	100
SAVP	12	L	Santorini	Z-2	Minoan	72.94	0.36	14.22	2.23	0.1	0.28	1.58	4.71	3.35	0	99.77		73.1081	0.36083	14.2528	2.23514	0.100231	0.280645	1.58364	4.72086	3.35772	0	100
SAVP	12	L	Santorini	Z-2	Minoan	73.28	0.3	14.4	1.99	0	0.27	1.52	4.64	3.35	0	99.75		73.4637	0.300752	14.4361	1.99499	0	0.270677	1.52381	4.65163	3.3584	0	100
SAVP	12	L	Santorini	Z-2	Minoan	74.14	0.22	14.5	2.1	0.09	0.42	1.3	3.69	3.28	0	99.74		74.3333	0.220573	14.5378	2.10547	0.0902346	0.421095	1.30339	3.69962	3.28855	0	100
SAVP	12	L	Santorini	Z-2	Minoan	73.09	0.44	14.27	2.07	0.15	0.45	1.33	4.57	3.37	0	99.74		73.2805	0.441147	14.3072	2.0754	0.150391	0.451173	1.33347	4.58191	3.37878	0	100
SAVP	12	L	Santorini	Z-2	Minoan	73.62	0.29	14.48	2.04	0	0.42	1.31	4.11	3.47	0	99.74		73.8119	0.290756	14.5177	2.04532	0	0.421095	1.31341	4.12071	3.47905	0	100
SAVP	13	T	Santorini	Z-2	Minoan	73.65	0.26	13.89	1.89	0.12	0.27	1.43	4.97	3.29		99.77		73.8198	0.260599	13.922	1.89436	0.120277	0.270622	1.4333	4.98146	3.29758		100
SAVP	13	T	Santorini	Z-2	Minoan	73.54	0.31	13.78	2.06	0.12	0.27	1.41	4.9	3.35		99.74		73.7317	0.310808	13.8159	2.06537	0.120313	0.270704	1.41368	4.91277	3.35873		100
SAVP	13	T	Santorini	Z-2	Minoan	73.65	0.29	13.79	2.07	0.13	0.3	1.37	4.85	3.28		99.73		73.8494	0.290785	13.8273	2.0756	0.130352	0.300812	1.37371	4.86313	3.28888		100
SAVP	13	T	Santorini	Z-2	Minoan	73.93	0.27	13.67	1.96	0.08	0.27	1.37	4.74	3.42		99.71		74.145	0.270785	13.7098	1.9657	0.0802327	0.270785	1.37398	4.75379	3.42995		100
SAVP	13	T	Santorini	Z-2	Minoan	73.78	0.28	13.72	2.04	0.05	0.31	1.39	4.74	3.41		99.72		73.9872	0.280786	13.7585	2.04573	0.0501404	0.31087	1.3939	4.75331	3.41957		100
SAVP	13	T	Santorini	Z-2	Minoan	73.94	0.3	13.65	2.04	0.13	0.28	1.36	4.71	3.31		99.72		74.1476	0.300842	13.6883	2.04573	0.130365	0.280786	1.36382	4.72323	3.31929		100
SAVP	13	T	Santorini	Z-2	Minoan	73.7	0.29	13.76	2.08	0.12	0.28	1.39	4.8	3.3		99.72		73.9069	0.290814	13.7986	2.08584	0.120337	0.280786	1.3939	4.81348	3.30927		100
SAVP	13	T	Santorini	Z-2	Minoan	74.08	0.31	13.03	2.15	0.07	0.3	1.41	4.83	3.54		99.72		74.288	0.31087	13.0666	2.15604	0.0701966	0.300842	1.41396	4.84356	3.54994		100
SAVP	13	T	Santorini	Z-2	Minoan	73.46	0.31	13.32	2.22	0.09	0.31	1.45	4.98	3.58		99.72		73.6663	0.31087	13.3574	2.22623	0.0902527	0.31087	1.45407	4.99398	3.59005		100
SAVP	14	M	Santorini	Z-2	Minoan	71.12	0.27	13.58	2	0.12	0.28	1.34	4.83	3.2		96.74		73.5166	0.279099	14.0376	2.0674	0.124044	0.289436	1.38516	4.99276	3.30784		100
SAVP	14	M	Santorini	Z-2	Minoan	71.76	0.33	13.7	1.96	0.02	0.28	1.41	4.55	3.22		97.23		73.8044	0.339401	14.0903	2.01584	0.0205698	0.287977	1.45017	4.67963	3.31174		100					114.756	56.4132	32.8572	266.097	10.3795		509.086	25.4109	52.0085	5.59578	21.2446	5.98407	0.859911	5.19957		5.34364
SAVP	14	M	Santorini	Z-2	Minoan	71.79	0.3	13.67	2.05	0.08	0.27	1.41	4.45	3.2		97.22		73.8428	0.308578	14.0609	2.10862	0.0822876	0.277721	1.45032	4.57725	3.2915		100					109.372	48.873	28.5462	226.116	10.4439		461.629	22.0976	48.2689	5.27657	21.8346	5.8827	0.793488	5.15201		5.56654
SAVP	14	M	Santorini	Z-2	Minoan	70.26	0.27	13.56	1.85	0.03	0.28	1.32	4.69	3.26		95.52		73.5553	0.282663	14.196	1.93677	0.031407	0.293132	1.38191	4.90997	3.4129		100					124.949	48.0061	23.6722	204.53	11.0333		448.174	19.684	46.2517	5.03244	21.0584	6.59786	1.08487	6.01217		5.34143
SAVP	14	M	Santorini	Z-2	Minoan	72.04	0.29	13.65	2.14	0.08	0.29	1.41	4.65	3.3		97.85		73.6229	0.296372	13.9499	2.18702	0.0817578	0.296372	1.44098	4.75217	3.37251		100					113.956	47.4362	25.1154	211.526	9.5867		439.072	21.4468	44.3766	4.575	18.3769	6.46467	0.917067	5.19627		4.66925
SAVP	14	M	Santorini	Z-2	Minoan	70.89	0.25	13.31	2.01	0.08	0.27	1.37	4.84	3.15		96.17		73.7132	0.259956	13.8401	2.09005	0.083186	0.280753	1.42456	5.03275	3.27545		100					114.004	50.1618	28.132	233.774	10.0605		456.178	23.2027	47.5463	4.94797	18.2292	5.34865	0.831964	5.60578		5.01042
SAVP	14	M	Santorini	Z-2	Minoan	71.98	0.3	13.91	2.24	0.03	0.27	1.35	4.55	3.38		98.01		73.4415	0.306091	14.1924	2.28548	0.0306091	0.275482	1.37741	4.64238	3.44863		100					118.343	58.3356	36.2809	288.987	11.399		533.332	26.5421	55.7657	5.657	22.2817	5.69935	0.897544	4.97247		5.65391
SAVP	14	M	Santorini	Z-2	Minoan	69.99	0.34	13.1	2.05	0.05	0.29	1.35	4.4	3.25		94.82		73.8135	0.358574	13.8157	2.16199	0.0527315	0.305843	1.42375	4.64037	3.42755		100					110.704	45.6529	23.8366	204.394	10.4306		436.046	19.0294	45.2958	5.28011	17.7511	7.27793	1.0565	6.06929		4.30244
SAVP	14	M	Santorini	Z-2	Minoan	70.5	0.3	13.36	2.22	0.02	0.26	1.38	4.82	3.24		96.1		73.3611	0.312175	13.9022	2.31009	0.0208117	0.270552	1.436	5.01561	3.37149		100					115.48	61.2475	39.8091	310.324	10.6594		560.038	29.4576	58.9624	6.24717	24.3198	5.88361	0.882932	5.43149		6.47544
SAVP	14	M	Santorini	Z-2	Minoan	70.81	0.28	13.53	1.96	0.04	0.25	1.37	4.68	3.17		96.09		73.6913	0.291393	14.0805	2.03975	0.0416276	0.260173	1.42575	4.87043	3.29899		100					130.491	44.0756	27.1106	219.654	10.5068		487.997	23.0223	49.2066	5.48794	20.5248	6.14346	1.19193	6.74163		5.20347
SAVP	14	M	Santorini	Z-2	Minoan	72.36	0.25	13.38	1.87	0.02	0.22	1.3	4.59	3.44		97.43		74.2687	0.256594	13.7329	1.91933	0.0205276	0.225803	1.33429	4.71107	3.53074		100					118.966	59.0618	37.4135	289.976	11.4149		531.256	26.4285	55.1535	6.00005	23.0016	5.43715	0.708808	5.11753		5.86487
SAVP	14	M	Santorini	Z-2	Minoan	71.79	0.29	13.69	2.19	0.17	0.3	1.33	4.63	3.43		97.82		73.3899	0.296463	13.9951	2.23881	0.173789	0.306686	1.35964	4.73318	3.50644		100					119.621	51.5667	29.111	245.348	10.4533		482.013	22.6767	48.8901	5.36991	20.5965	6.60413	0.933576	5.11499		5.46682
SAVP	14	M	Santorini	Z-2	Minoan	71.42	0.31	13.72	2.32	0.12	0.3	1.39	4.83	3.2		97.61		73.1687	0.31759	14.0559	2.37681	0.122938	0.307346	1.42403	4.94826	3.27835		100					117.362	56.7687	34.6616	274.925	11.5698		520.103	26.7101	51.7721	5.62476	22.2449	6.03078	0.97313	5.18045		5.47929
SAVP	14	M	Santorini	Z-2	Minoan	70.98	0.26	13.53	2.19	0.12	0.29	1.41	4.55	3.27		96.6		73.4783	0.269151	14.0062	2.26708	0.124224	0.300207	1.45963	4.71014	3.38509		100
SAVP	14	M	Santorini	Z-2	Minoan	69.53	0.34	13.51	1.84	0.05	0.29	1.36	4.43	3.16		94.51		73.5689	0.35975	14.2948	1.94688	0.0529045	0.306846	1.439	4.68733	3.34356		100					110.72	52.6304	30.031	244.304	9.86475		482.646	22.8453	51.265	5.62174	22.0246	5.52857	0.777594	6.05908		5.50141
SAVP	14	M	Santorini	Z-2	Minoan	70.24	0.29	13.25	1.97	0.15	0.29	1.44	4.42	3.29		95.34		73.6732	0.304175	13.8976	2.06629	0.157332	0.304175	1.51038	4.63604	3.45081		100
SAVP	14	M	Santorini	Z-2	Minoan	72.04	0.33	13.69	1.98	0.03	0.3	1.37	4.78	3.27		97.79		73.6681	0.337458	13.9994	2.02475	0.030678	0.30678	1.40096	4.88803	3.3439		100
SAVP	14	M	Santorini	Z-2	Minoan	69.02	0.3	13.32	1.87	0.11	0.29	1.31	4.46	3.27		93.95		73.4646	0.319319	14.1778	1.99042	0.117084	0.308675	1.39436	4.74721	3.48057		100					109.513	54.8242	33.9049	260.917	10.1941		484.308	24.1954	51.9771	5.31381	21.4168	7.02851	0.881392	4.81162		5.03355
SAVP	14	M	Santorini	Z-2	Minoan	72.72	0.28	13.86	1.99	0.06	0.27	1.34	4.67	3.31		98.5		73.8274	0.284264	14.0711	2.0203	0.0609137	0.274112	1.36041	4.74112	3.36041		100					130.464	45.7286	24.4319	192.817	10.731		438.478	20.5471	43.1941	4.93936	17.7997	6.06528	1.05503	9.92316		4.85739
SAVP	14	M	Santorini	Z-2	Minoan	72.29	0.35	13.99	2.04	0.12	0.25	1.39	4.86	3.37		98.66		73.2718	0.354754	14.18	2.06771	0.12163	0.253395	1.40888	4.92601	3.41577		100					125.737	51.3978	29.6787	243.849	10.5954		484.994	23.2086	48.8307	5.32076	21.9088	6.32759	0.965141	5.4633		5.54563
SAVP	14	M	Santorini	Z-2	Minoan	71.47	0.29	13.76	1.86	0.04	0.25	1.43	4.59	3.21		96.9		73.7564	0.299278	14.2002	1.9195	0.0412797	0.257998	1.47575	4.73684	3.31269		100					122.281	57.6511	32.2569	264.952	10.0488		502.617	24.3601	50.2603	5.62232	21.1695	6.40832	0.750301	5.89065		5.34991
SAVP	14	M	Santorini	Z-2	Minoan	70.74	0.21	13.37	1.77	0.08	0.31	1.4	4.78	3.25		95.91		73.7566	0.218955	13.9402	1.84548	0.0834115	0.32322	1.4597	4.98384	3.38859		100					120.524	57.7378	32.1025	257.175	10.7465		498.058	25.6301	52.3954	5.67825	22.9032	5.59397	0.942036	5.82974		5.88024
SAVP	14	M	Santorini	Z-2	Minoan	69.87	0.26	13.29	1.99	0.07	0.31	1.38	4.2	3.19		94.56		73.8896	0.274958	14.0546	2.10448	0.0740271	0.327834	1.45939	4.44162	3.37352		100
SAVP	14	M	Santorini	Z-2	Minoan	71.01	0.38	13.39	1.87	0.11	0.32	1.3	4.33	3.26		95.97		73.9919	0.395957	13.9523	1.94853	0.114619	0.333438	1.35459	4.51183	3.39689		100					111.132	35.3752	20.107	150.713	11.7747		423.592	16.6171	40.5587	5.88388	26.9746	11.7588				4.88955
SAVP	14	M	Santorini	Z-2	Minoan	70.92	0.25	13.33	1.98	0.13	0.25	1.21	4.47	3.22		95.76		74.0602	0.261069	13.9202	2.06767	0.135756	0.261069	1.26358	4.66792	3.36257		100
SAVP	14	M	Santorini	Z-2	Minoan	69.23	0.28	13.25	2.06	0.16	0.26	1.3	4.66	3.22		94.42		73.3213	0.296547	14.033	2.18174	0.169456	0.275365	1.37683	4.9354	3.41029		100					115.872	62.9449	37.4234	306.915	10.8786		547.714	28.6592	59.2143	6.23262	23.8954	5.64846	0.826107	4.94992		6.1082
SAVP	14	M	Santorini	Z-2	Minoan	70.48	0.26	13.44	2.02	0.07	0.28	1.34	4.61	3.12		95.62		73.7084	0.27191	14.0556	2.11253	0.0732064	0.292826	1.40138	4.82117	3.26292		100					114.052	55.9292	33.2214	262.923	10.219		500.307	24.9973	52.9294	5.62022	20.5059	5.56479	1.00621	5.33929		5.29637
SAVP	14	M	Santorini	Z-2	Minoan	71.01	0.26	13.42	1.92	0.12	0.3	1.43	4.79	3.23		96.48		73.6007	0.269486	13.9096	1.99005	0.124378	0.310945	1.48217	4.96476	3.34784		100					106.179	44.9712	21.4647	188.032	9.86937		401.917	19.168	43.4508	4.75614	14.0865	7.10087	0.930191	5.52345		4.52917
SAVP	14	M	Santorini	Z-2	Minoan	71.63	0.29	13.44	2.05	0.11	0.29	1.31	4.45	3.32		96.89		73.9292	0.299308	13.8714	2.1158	0.113531	0.299308	1.35205	4.59284	3.42657		100					118.671	59.4936	38.3032	308.82	11.2516		550.201	28.2197	57.2103	6.70096	23.7842	6.19435	0.922415	5.62246		6.42568
SAVP	14	M	Santorini	Z-2	Minoan	69.92	0.32	13.31	2.02	0	0.28	1.31	4.27	3.28		94.71		73.8254	0.337874	14.0534	2.13283	0	0.295639	1.38317	4.5085	3.4632		100
SAVP	14	M	Santorini	Z-2	Minoan	71.12	0.27	13.67	1.92	0.04	0.25	1.38	4.76	3.33		96.74		73.5166	0.279099	14.1307	1.9847	0.0413479	0.258425	1.4265	4.92041	3.44222		100
SAVP	14	M	Santorini	Z-2	Minoan	70.38	0.35	13.4	1.98	0.04	0.28	1.31	4.61	3.16		95.51		73.6886	0.366454	14.0299	2.07308	0.0418804	0.293163	1.37158	4.82672	3.30855		100					108.591	42.5028	21.6864	183.511	9.56413		400.289	17.2256	40.4172	4.91845	16.1162	5.7841	0.812983	4.75171		4.76965
SAVP	14	M	Santorini	Z-2	Minoan	71.56	0.28	13.54	1.88	0.07	0.26	1.44	4.68	3.2		96.91		73.8417	0.288928	13.9717	1.93994	0.072232	0.26829	1.48591	4.82922	3.30203		100
SAVP	14	M	Santorini	Z-2	Minoan	71.66	0.33	13.38	2.01	0	0.28	1.45	4.59	3.21		96.91		73.9449	0.340522	13.8066	2.07409	0	0.288928	1.49623	4.73635	3.31235		100
SAVP	14	M	Santorini	Z-2	Minoan	69.38	0.28	13.02	2.02	0.02	0.23	1.38	3.99	2.96		93.28		74.3782	0.300172	13.958	2.16552	0.0214408	0.246569	1.47942	4.27744	3.17324		100					120.451	62.6464	37.6725	301.6	11.0517		550.786	28.5926	58.192	6.31743	24.7807	5.83211	0.824013	5.47572		6.21807
SAVP	14	M	Santorini	Z-2	Minoan	73.1	0.25	13.9	2.06	0.06	0.32	1.35	4.39	3.31		98.74		74.0328	0.25319	14.0774	2.08629	0.0607656	0.324083	1.36723	4.44602	3.35224		100
SAVP	14	M	Santorini	Z-2	Minoan	72.22	0.3	13.12	2.05	0	0.31	1.44	4.46	3.29		97.19		74.3081	0.308674	13.4993	2.10927	0	0.318963	1.48163	4.58895	3.38512		100
SAVP	14	M	Santorini	Z-2	Minoan	70.15	0.32	13.03	1.92	0.05	0.29	1.35	4.62	3.12		94.85		73.9589	0.337375	13.7375	2.02425	0.0527148	0.305746	1.4233	4.87085	3.2894		100					107.918	39.9065	20.3099	176.5	8.61736		393.322	17.5815	39.4556	3.73471	14.9837
SAVP	14	M	Santorini	Z-2	Minoan	71.26	0.31	13.43	2.18	0.09	0.27	1.41	4.46	3.21		96.62		73.7528	0.320845	13.8998	2.25626	0.0931484	0.279445	1.45933	4.61602	3.32229		100
SAVP	14	M	Santorini	Z-2	Minoan	72.75	0.27	13.76	2.07	0.03	0.27	1.46	4.46	3.29		98.36		73.963	0.274502	13.9894	2.10451	0.0305002	0.274502	1.48434	4.53436	3.34486		100
SAVP	14	M	Santorini	Z-2	Minoan	72.97	0.35	13.35	2.17	0	0.28	1.41	4.39	3.32		98.24		74.2773	0.35627	13.5892	2.20888	0	0.285016	1.43526	4.46865	3.37948		100
SAVP	14	M	Santorini	Z-2	Minoan	70.45	0.27	13.27	2.05	0.01	0.28	1.42	4.03	3.14		94.92		74.2204	0.28445	13.9802	2.15971	0.0105352	0.294985	1.496	4.24568	3.30805		100
SAVP	14	M	Santorini	Z-2	Minoan	71.6	0.3	13.32	2.15	0.05	0.31	1.36	4.39	3.21		96.69		74.0511	0.31027	13.776	2.2236	0.0517117	0.320612	1.40656	4.54028	3.31989		100					112.626	60.4064	37.6101	291.9	10.6858		542.57	28.2133	57.0002	6.12807	24.0164	5.13861	0.795769	5.34755		6.15138
SAVP	14	M	Santorini	Z-2	Minoan	71.8	0.25	13.07	1.76	0.03	0.23	1.31	4.24	3.23		95.92		74.854	0.260634	13.6259	1.83486	0.0312761	0.239783	1.36572	4.42035	3.36739		100
SAVP	14	M	Santorini	Z-2	Minoan	71.31	0.31	13.67	2.12	0	0.27	1.42	4.32	3.3		96.72		73.7283	0.320513	14.1336	2.19189	0	0.279156	1.46816	4.4665	3.41191		100
SAVP	14	M	Santorini	Z-2	Minoan	73.27	0.32	13.45	2.16	0.04	0.24	1.44	4.5	3.28		98.7		74.2351	0.324215	13.6272	2.18845	0.0405268	0.243161	1.45897	4.55927	3.3232		100
SAVP	14	M	Santorini	Z-2	Minoan	73.14	0.32	13.22	1.98	0.16	0.3	1.42	4.84	3.29		98.67		74.1259	0.324313	13.3982	2.00669	0.162157	0.304044	1.43914	4.90524	3.33435		100
SAVP	14	M	Santorini	Z-2	Minoan	71.56	0.27	12.82	2.2	0.01	0.29	1.3	4.29	3.19		95.93		74.5961	0.281455	13.3639	2.29334	0.0104243	0.302304	1.35515	4.47201	3.32534		100					114.723	56.57	36.5473	287.7	10.3155		543.909	28.695	55.6576	5.9878	23.1722	5.0026	0.842153	5.1279		5.76082
SAVP	14	M	Santorini	Z-2	Minoan	72.75	0.31	13.39	2.05	0.1	0.3	1.38	4.45	3.37		98.1		74.159	0.316004	13.6493	2.0897	0.101937	0.30581	1.40673	4.53619	3.43527		100
SAVP	14	M	Santorini	Z-2	Minoan	71.42	0.27	12.52	1.97	0.11	0.26	1.33	4.21	3.23		95.32		74.9266	0.283256	13.1347	2.06672	0.115401	0.272765	1.3953	4.4167	3.38859		100
SAVP	14	M	Santorini	Z-2	Minoan	71.48	0.33	13.46	2.01	0	0.27	1.35	4.44	3.32		96.66		73.9499	0.341403	13.9251	2.07945	0	0.27933	1.39665	4.59342	3.43472		100
SAVP	14	M	Santorini	Z-2	Minoan	72.46	0.25	13.23	1.88	0.04	0.23	1.31	4.42	3.3		97.12		74.6087	0.257414	13.6223	1.93575	0.0411862	0.23682	1.34885	4.55107	3.39786		100					114.036	46.3461	27.697	219.4	9.81516		443.694	21.1531	45.6373	4.69695	17.3062					4.84458
SAVP	14	M	Santorini	Z-2	Minoan	70.69	0.28	13.48	2.12	0.07	0.29	1.31	4.24	3.35		95.83		73.766	0.292184	14.0666	2.21225	0.073046	0.302619	1.367	4.4245	3.49577		100
SAVP	15	T	Santorini	Z-2	Minoan	73.4084	0.31569	14.0377	2.03094	0.063138	0.294644	1.4627	4.91424	3.47259		100		73.4084	0.31569	14.0377	2.03094	0.063138	0.294644	1.4627	4.91424	3.47259		100					119.86	57.45	34.88	294.13	10.83		519.81	26.72	53.71	6.12	21.39	0	0	0		5.16
SAVP	15	T	Santorini	Z-2	Minoan	73.4495	0.304334	13.9259	2.04638	0.0944485	0.29384	1.44821	4.99528	3.44212		100		73.4495	0.304334	13.9259	2.04638	0.0944485	0.29384	1.44821	4.99528	3.44212		100					124.87	69.23	45.98	337.59	11.7		611.73	33.23	65.88	7.16	27.17	6.37	0	6.55		7.88
SAVP	17	M	Santorini	Z-2	Minoan	70.43	0.3123	13.32	1.76	0.028	0.2888	1.42	4.57	3.19	0.0625	95.3817		73.8402	0.327421	13.9649	1.84522	0.0293557	0.302783	1.48876	4.79128	3.34446	0.0655262	99.9999			30.46	9.99	132.95	67.81	44.59	362.93	12.55	3.77	638.62	33.43	64.79	7.13	27.51	5.14	0.85	6.22	0.993	6.26	1.5
SAVP	17	M	Santorini	Z-2	Minoan	70.28	0.3103	13.35	1.95	0.0251	0.2836	1.43	4.65	3.15	0.0592	95.4883		73.6006	0.324961	13.9808	2.04214	0.0262859	0.297	1.49757	4.86971	3.29883	0.0619971	99.9999			32.66	10.43	133.5	68.37	46.57	364.62	12.16	3.96	634.28	33.21	65.39	7.29	26.83	6.13	0.892	7.31	1.056	7.15	1.606
SAVP	17	M	Santorini	Z-2	Minoan	69.33	0.2891	13.23	2.16	0.0183	0.2811	1.4	4.5	3.16	0.0095	94.3781		73.4598	0.306321	14.0181	2.28867	0.0193901	0.297845	1.48339	4.76806	3.34823	0.0100659	99.9999			29.95	9.7	123.04	66.35	45.41	347.81	11.39	3.68	584.37	31.3	60.72	6.89	26.12	5.72	0.912	6.65	1.104	6.44	1.533
SAVP	17	M	Santorini	Z-2	Minoan	70.59	0.3002	13.29	1.86	0.119	0.28	1.3982	4.38	3.34	0.0715	95.629		73.8165	0.313922	13.8975	1.94502	0.124439	0.292798	1.46211	4.5802	3.49266	0.0747681	99.9999			29.27	9.04	124.11	66.06	43.6	338.32	12.08	3.73	593.28	31.49	62.05	6.78	25.36	5.92	0.915	5.98	0.945	6.75	1.487
SAVP	17	M	Santorini	Z-2	Minoan	70.45	0.2655	13.58	2.03	0.0722	0.2891	1.4	4.52	3.31	0.0307	95.9476		73.4255	0.276714	14.1536	2.11574	0.0752494	0.30131	1.45913	4.7109	3.4498	0.0319966	99.9999			29.01	9.48	124.02	64.18	43.38	340.86	11.78	3.48	585.01	31.16	61.46	6.65	26.52	5.9	0.967	5.59	1.052	6.99	1.475
SAVP	17	M	Santorini	Z-2	Minoan	71.81	0.2839	13.63	2.06	0	0.3087	1.43	4.75	3.18	0.0475	97.5001		73.6512	0.291179	13.9795	2.11282	0	0.316615	1.46667	4.87179	3.26154	0.0487179	100
SAVP	17	M	Santorini	Z-2	Minoan	70.86	0.2596	13.41	1.96	0.0795	0.2419	1.43	4.27	3.31	0.0575	95.8786		73.906	0.270759	13.9864	2.04425	0.0829174	0.252298	1.49147	4.45355	3.45228	0.0599717	99.9999
SAVP	17	M	Santorini	Z-2	Minoan	69.08	0.2798	12.93	1.77	0.0041	0.3199	1.43	4.22	3.18	0.0151	93.229		74.0971	0.300121	13.8691	1.89855	0.00439777	0.343134	1.53386	4.52649	3.41096	0.0161967	99.9999
SAVP	17	M	Santorini	Z-2	Minoan	71.13	0.2771	13.68	2.01	0.091	0.275	1.44	4.86	3.17	0.0285	96.9617		73.3589	0.285783	14.1087	2.07298	0.0938515	0.283617	1.48512	5.01229	3.26933	0.029393	99.9999
SAVP	17	M	Santorini	Z-2	Minoan	71.46	0.3371	13.65	1.98	0.1103	0.2423	1.3707	4.88	3.18	0.0011	97.2115		73.5098	0.34677	14.0415	2.0368	0.113464	0.24925	1.41002	5.01998	3.27122	0.00113155	100
SAVP	17	M	Santorini	Z-2	Minoan	70.71	0.2738	13.39	1.94	0.0709	0.2781	1.43	4.43	3.26	0.0229	95.8058		73.8056	0.285786	13.9762	2.02493	0.0740039	0.290275	1.4926	4.62394	3.40272	0.0239025	99.9999
SAVP	17	M	Santorini	Z-2	Minoan	67.65	0.2971	12.78	1.94	0.1116	0.3027	1.3666	4.14	3.03	0.0301	91.6481		73.815	0.324175	13.9446	2.11679	0.12177	0.330285	1.49114	4.51728	3.30612	0.032843	100
SAVP	17	M	Santorini	Z-2	Minoan	69.22	0.3136	13.46	2.03	0.0686	0.2957	1.3989	4.82	3.12	0.007	94.7339		73.0678	0.331033	14.2082	2.14284	0.0724134	0.312137	1.47666	5.08794	3.29344	0.00738912	99.9999
SAVP	17	M	Santorini	Z-2	Minoan	69.24	0.2871	13.15	2.01	0.0985	0.2928	1.3481	4.69	3.12	0.0367	94.2733		73.446	0.30454	13.9488	2.1321	0.104483	0.310586	1.42999	4.9749	3.30953	0.0389294	99.9999
SAVP	17	M	Santorini	Z-2	Minoan	69.56	0.2765	13.22	1.92	0.0133	0.3015	1.3482	4.78	3.16	0.0398	94.6193		73.5157	0.292224	13.9718	2.02918	0.0140563	0.318645	1.42487	5.05182	3.3397	0.0420633	100
SAVP	17	M	Santorini	Z-2	Minoan	69.35	0.2864	13.13	2.01	0.03	0.2576	1.2717	4.56	3.22	0.0264	94.1421		73.6652	0.304221	13.947	2.13507	0.0318667	0.273629	1.35083	4.84374	3.42036	0.0280427	100
SAVP	17	M	Santorini	Z-2	Minoan	69.93	0.2737	13.22	1.96	0.0466	0.2732	1.3722	4.61	3.19	0	94.8758		73.7069	0.288482	13.934	2.06586	0.0491168	0.287955	1.44631	4.85898	3.36229	0	99.9999
SAVP	17	M	Santorini	Z-2	Minoan	69.85	0.292	13.26	1.75	0.0875	0.2688	1.3407	4.54	3.28	0.0419	94.711		73.7507	0.308306	14.0005	1.84773	0.0923863	0.283811	1.41557	4.79353	3.46317	0.0442398	99.9999			25.82	9.2	123.34	64.82	44.01	335.04	11.08	3.47	587.1	31.24	59.34	7.14	24.65	5.24	1	5.69	1.031	6.83	1.81
SAVP	17	M	Santorini	Z-2	Minoan	69.36	0.29	13.29	1.9	0.0424	0.2965	1.41	4.46	3.15	0.0436	94.2426		73.5973	0.307716	14.1019	2.01607	0.0449903	0.314614	1.49614	4.73247	3.34244	0.0462636	99.9999
SAVP	17	M	Santorini	Z-2	Minoan	70.33	0.2582	13.27	2.11	0.0689	0.285	1.41	4.4	3.2	0.038	95.3702		73.7442	0.270734	13.9142	2.21243	0.0722448	0.298835	1.47845	4.6136	3.35535	0.0398447	99.9999			20.12	9.31	120.36	65.16	41.21	324.32	10.79	3.49	555.69	29.93	58.15	6.42	23.56	5.65	0.842	5.4	0.998	6.65	1.473
SAVP	17	M	Santorini	Z-2	Minoan	70.63	0.264	13.6	1.91	0.0533	0.3028	1.4	4.47	3.25	0.0425	95.9227		73.6322	0.275222	14.1781	1.99119	0.0555656	0.315671	1.45951	4.66	3.38814	0.0443065	99.9999			26.29	8.25	122.23	63.22	42.82	321.87	10.7	3.37	568.16	30.02	57.85	6.29	25.43	5.79	0.866	6.42	1.047	6.49	1.502
SAVP	17	M	Santorini	Z-2	Minoan	70.66	0.2988	13.59	1.92	0.1224	0.2861	1.41	4.35	3.15	0.0441	95.8315		73.7336	0.311797	14.1811	2.00352	0.127724	0.298545	1.47133	4.53922	3.28702	0.0460183	99.9999			18.51	9.11	122.07	65.17	44.03	343.86	11.49	3.45	586.65	32.07	62.01	6.97	25.39	5.92	0.975	6.21	1.011	6.74	1.499
SAVP	17	M	Santorini	Z-2	Minoan	69.26	0.3105	13.07	2.08	0	0.2865	1.3557	4.44	3.17	0.0542	94.027		73.6597	0.330224	13.9003	2.21213	0	0.3047	1.44182	4.72205	3.37137	0.057643	99.9999
SAVP	17	M	Santorini	Z-2	Minoan	69.72	0.2994	13.61	2.15	0.0149	0.2238	1.44	4.77	3.15	0.014	95.3922		73.0877	0.313862	14.2674	2.25385	0.0156197	0.23461	1.50956	5.00041	3.30216	0.0146763	99.9999
SAVP	17	M	Santorini	Z-2	Minoan	69.54	0.2593	13.4	1.96	0.1221	0.2839	1.43	4.33	3.24	0.0396	94.6049		73.5057	0.274087	14.1642	2.07177	0.129063	0.30009	1.51155	4.57693	3.42477	0.0418583	100
SAVP	17	M	Santorini	Z-2	Minoan	68.78	0.2708	13.25	2.07	0.0482	0.2883	1.41	4.41	3.15	0.0469	93.7243		73.3855	0.288933	14.1372	2.20861	0.0514274	0.307604	1.50441	4.70529	3.36092	0.0500404	99.9999
SAVP	17	M	Santorini	Z-2	Minoan	68.57	0.2569	13.08	1.93	0.0829	0.2675	1.3321	4.28	3.2	0	92.9995		73.7316	0.276238	14.0646	2.07528	0.0891403	0.287636	1.43237	4.60218	3.44088	0	99.9999
SAVP	17	M	Santorini	Z-2	Minoan	70.39	0.3235	13.33	1.94	0.0779	0.3059	1.43	4.33	3.26	0.0341	95.4215		73.7674	0.339022	13.9696	2.03308	0.0816378	0.320578	1.49861	4.53776	3.41642	0.0357362	99.9999
SAVP	17	M	Santorini	Z-2	Minoan	70.31	0.2874	13.01	2.06	0.047	0.2768	1.3892	4.72	3.24	0.0753	95.4158		73.688	0.301208	13.6351	2.15897	0.0492581	0.290099	1.45594	4.94677	3.39566	0.0789177	99.9999
SAVP	17	M	Santorini	Z-2	Minoan	70.44	0.3025	13.04	1.96	0.0601	0.2711	1.3932	4.44	3.25	0.0318	95.1888		74.0003	0.317789	13.6991	2.05907	0.0631377	0.284802	1.46362	4.66441	3.41427	0.0334073	99.9999
SAVP	1		Santorini	Y-2	Cape Riva	68.1	0.43	13.5	2.15	0.1	1	1.6	4.5	3	0.1	94.48		72.0787	0.455123	14.2887	2.27561	0.105843	1.05843	1.69348	4.76291	3.17528	0.105843	100
SAVP	3	M	Santorini	Y-2	Cape Riva	71.41	0.44	14.5	3.12	0.08	0.43	1.65	5.28	3.07		99.98		71.4243	0.440088	14.5029	3.12062	0.080016	0.430086	1.65033	5.28106	3.07061		100
SAVP	3	M	Santorini	Y-2	Cape Riva	71.15	0.47	14.76	3.14	0.06	0.42	1.73	5.31	2.96		100		71.15	0.47	14.76	3.14	0.06	0.42	1.73	5.31	2.96		100
SAVP	3	M	Santorini	Y-2	Cape Riva	71.63	0.46	14.6	3.02	0.04	0.41	1.72	5.18	2.93		99.99		71.6372	0.460046	14.6015	3.0203	0.040004	0.410041	1.72017	5.18052	2.93029		100
SAVP	3	M	Santorini	Y-2	Cape Riva	71.47	0.45	14.17	3.2	0.1	1.05	1.68	4.72	3.15		99.99		71.4771	0.450045	14.1714	3.20032	0.10001	1.05011	1.68017	4.72047	3.15032		100
SAVP	3	M	Santorini	Y-2	Cape Riva	71.64	0.42	14.33	2.91	0	0.38	1.8	5.71	2.81		100		71.64	0.42	14.33	2.91	0	0.38	1.8	5.71	2.81		100
SAVP	4	T	Santorini	Y-2	Cape Riva	67.1	0.69	15.3	4.55	0.18	1.08	3.15	5.29	2.44	0.18	99.96		67.1269	0.690276	15.3061	4.55182	0.180072	1.08043	3.15126	5.29212	2.44098	0.180072	100					69	140	57	264	10		451	23	53
SAVP	4	T	Santorini	Y-2	Cape Riva	60.9	0.8	16.7	6.31	0.16	3.01	6.12	4.29	1.61	0.17	100.07		60.8574	0.79944	16.6883	6.30559	0.159888	3.00789	6.11572	4.287	1.60887	0.169881	100					45	180	41	185	8		292	12	37
SAVP	6	T	Santorini	Y-2	Cape Riva	60.5	0.85	16.7	6.47	0.14	3.23	6.21	4.2	1.61	0.15	100.06		60.4637	0.84949	16.69	6.46612	0.139916	3.22806	6.20628	4.19748	1.60903	0.14991	100					50	181	43	200	7		363	14	49
SAVP	6	T	Santorini	Y-2	Cape Riva	60.7	0.87	16.5	6.7	0.14	3.02	6.13	4.23	1.63	0.14	100.06		60.6636	0.869478	16.4901	6.69598	0.139916	3.01819	6.12632	4.22746	1.62902	0.139916	100					52	185	49	181	7		339	21	48
SAVP	6	T	Santorini	Y-2	Cape Riva	60.9	0.8	16.7	6.31	0.16	3.01	6.12	4.29	1.61	0.17	100.07		60.8574	0.79944	16.6883	6.30559	0.159888	3.00789	6.11572	4.287	1.60887	0.169881	100					45	180	41	185	8		292	12	27
SAVP	6	T	Santorini	Y-2	Cape Riva	61.1	0.82	16.1	6.13	0.15	2.78	5.65	5.41	1.72	0.16	100.02		61.0878	0.819836	16.0968	6.12877	0.14997	2.77944	5.64887	5.40892	1.71966	0.159968	100					53	179	45	196	8		303	20	24
SAVP	6	T	Santorini	Y-2	Cape Riva	61.7	0.84	16.3	6.26	0.15	2.63	5.58	4.66	1.78	0.15	100.05		61.6692	0.83958	16.2919	6.25687	0.149925	2.62869	5.57721	4.65767	1.77911	0.149925	100					57	182	49	205	8		370	20	38
SAVP	6	T	Santorini	Y-2	Cape Riva	61.7	0.81	16.1	5.72	0.16	2.88	5.76	4.38	1.72	0.15	99.38		62.0849	0.815053	16.2004	5.75569	0.160998	2.89797	5.79593	4.40733	1.73073	0.150936	100					51	164	42	190	8		324	16	52
SAVP	6	T	Santorini	Y-2	Cape Riva	62.8	0.79	16	5.32	0.14	2.46	5.2	4.61	1.88	0.15	99.35		63.2109	0.795169	16.1047	5.35481	0.140916	2.47609	5.23402	4.64016	1.8923	0.150981	100					57	160	45	212	9		364	18	54
SAVP	6	T	Santorini	Y-2	Cape Riva	64.3	0.81	16	5.42	0.12	1.94	4.41	4.77	2.1	0.17	100.04		64.2743	0.809676	15.9936	5.41783	0.119952	1.93922	4.40824	4.76809	2.09916	0.169932	100					68	157	49	247	9		437	19	36
SAVP	6	T	Santorini	Y-2	Cape Riva	64.4	0.81	15.8	5.38	0.17	1.7	4.09	5.36	2.13	0.18	100.02		64.3871	0.809838	15.7968	5.37892	0.169966	1.69966	4.08918	5.35893	2.12957	0.179964	100					70	161	57	241	7		426	26	49
SAVP	6	T	Santorini	Y-2	Cape Riva	64.7	0.79	15.8	5.32	0.16	1.65	4.05	5.02	2.3	0.21	100		64.7	0.79	15.8	5.32	0.16	1.65	4.05	5.02	2.3	0.21	100					64	146	52	238	9		423	30	50
SAVP	6	T	Santorini	Y-2	Cape Riva	65.4	0.79	15.6	5.1	0.12	1.47	3.76	5.27	2.28	0.16	99.95		65.4327	0.790395	15.6078	5.10255	0.12006	1.47074	3.76188	5.27264	2.28114	0.16008	100					71	148	55	258	10		436	29	38
SAVP	6	T	Santorini	Y-2	Cape Riva	65.5	0.77	15.5	5.14	0.12	1.49	3.84	5.19	2.23	0.18	99.96		65.5262	0.770308	15.5062	5.14206	0.120048	1.4906	3.84154	5.19208	2.23089	0.180072	100					70	153	56	252	9		434	26	36
SAVP	6	T	Santorini	Y-2	Cape Riva	65.7	0.74	15.6	4.98	0.12	1.64	3.78	4.94	2.3	0.17	99.97		65.7197	0.740222	15.6047	4.98149	0.120036	1.64049	3.78113	4.94148	2.30069	0.170051	100					71	148	55	260	9		446	23	46
SAVP	6	T	Santorini	Y-2	Cape Riva	66	0.71	15.1	4.31	0.15	1.51	3.38	5.8	2.41	0.17	99.54		66.305	0.713281	15.1698	4.32992	0.150693	1.51698	3.39562	5.8268	2.42114	0.170786	100					72	129	54	253	11		428	24	62
SAVP	6	T	Santorini	Y-2	Cape Riva	66.3	0.73	15.3	4.74	0.15	1.21	3.25	5.74	2.43	0.17	100.02		66.2867	0.729854	15.2969	4.73905	0.14997	1.20976	3.24935	5.73885	2.42951	0.169966	100					74	149	57	260	9		464	29	44
SAVP	6	T	Santorini	Y-2	Cape Riva	66.4	0.75	15.5	4.81	0.15	1.13	3.28	5.36	2.36	0.22	99.96		66.4266	0.7503	15.5062	4.81192	0.15006	1.13045	3.28131	5.36214	2.36094	0.220088	100					76	147	62	276	9		472	25	46
SAVP	6	T	Santorini	Y-2	Cape Riva	66.5	0.75	15.5	4.76	0.16	1.13	3.17	5.54	2.33	0.2	100.04		66.4734	0.7497	15.4938	4.7581	0.159936	1.12955	3.16873	5.53778	2.32907	0.19992	100					78	143	59	278	10		451	27	45
SAVP	6	T	Santorini	Y-2	Cape Riva	66.5	0.74	15.3	4.68	0.14	1.16	3.15	5.64	2.47	0.19	99.97		66.52	0.740222	15.3046	4.6814	0.140042	1.16035	3.15095	5.64169	2.47074	0.190057	100					77	146	59	268	10		477	30	41
SAVP	6	T	Santorini	Y-2	Cape Riva	66.6	0.7	15.1	4.1	0.15	1.09	3.13	6.13	2.44	0.18	99.62		66.854	0.70267	15.1576	4.11564	0.150572	1.09416	3.14194	6.15338	2.44931	0.180687	100					75	133	55	264	11		448	25	45
SAVP	6	T	Santorini	Y-2	Cape Riva	66.6	0.75	15.4	4.75	0.15	1.11	3.21	5.42	2.42	0.19	100		66.6	0.75	15.4	4.75	0.15	1.11	3.21	5.42	2.42	0.19	100					76	142	57	279	10		477	30	33
SAVP	6	T	Santorini	Y-2	Cape Riva	66.6	0.74	15.5	4.72	0.14	1.04	3.21	5.36	2.48	0.18	99.97		66.62	0.740222	15.5047	4.72142	0.140042	1.04031	3.21096	5.36161	2.48074	0.180054	100					75	140	58	259	10		465	29	45
SAVP	6	T	Santorini	Y-2	Cape Riva	66.7	0.74	15.6	4.76	0.14	1.07	3.15	5.23	2.47	0.18	100.04		66.6733	0.739704	15.5938	4.7581	0.139944	1.06957	3.14874	5.22791	2.46901	0.179928	100					77	140	57	271	9		473	29	50
SAVP	6	T	Santorini	Y-2	Cape Riva	66.8	0.74	15.5	4.64	0.13	1.07	3.08	5.41	2.48	0.16	100.01		66.7933	0.739926	15.4985	4.63954	0.129987	1.06989	3.07969	5.40946	2.47975	0.159984	100					77	142	58	279	10		477	30	48
SAVP	6	T	Santorini	Y-2	Cape Riva	66.9	0.67	15.4	4.44	0.14	1.12	3.52	5.15	2.55	0.19	100.08		66.8465	0.669464	15.3877	4.43645	0.139888	1.1191	3.51719	5.14588	2.54796	0.189848	100					70	145	55	260	11		431	24	55
SAVP	6	T	Santorini	Y-2	Cape Riva	66.9	0.71	15.5	4.62	0.14	1.15	3.18	5.24	2.43	0.18	100.05		66.8666	0.709645	15.4923	4.61769	0.13993	1.14943	3.17841	5.23738	2.42879	0.17991	100					70	139	58	262	11		462	27	54
SAVP	6	T	Santorini	Y-2	Cape Riva	66.9	0.68	15.3	4.51	0.16	1.13	3.13	5.72	2.4	0.18	100.11		66.8265	0.679253	15.2832	4.50504	0.159824	1.12876	3.12656	5.71371	2.39736	0.179802	100					72	139	57	273	10		460	20	43
SAVP	6	T	Santorini	Y-2	Cape Riva	66.9	0.75	15.4	4.69	0.15	1.08	3.04	5.27	2.54	0.17	99.99		66.9067	0.750075	15.4015	4.69047	0.150015	1.08011	3.0403	5.27053	2.54025	0.170017	100					78	139	61	278	11		470	30	52
SAVP	6	T	Santorini	Y-2	Cape Riva	67	0.69	15.3	4.54	0.18	1.08	3.14	5.38	2.44	0.18	99.93		67.0469	0.690483	15.3107	4.54318	0.180126	1.08076	3.1422	5.38377	2.44171	0.180126	100					69	140	57	264	10		451	23	53
SAVP	6	T	Santorini	Y-2	Cape Riva	67.1	0.73	15.4	4.64	0.16	0.99	3.14	5.26	2.41	0.18	100.01		67.0933	0.729927	15.3985	4.63954	0.159984	0.989901	3.13969	5.25947	2.40976	0.179982	100					82	142	58	280	11		476	28	37
SAVP	6	T	Santorini	Y-2	Cape Riva	67.1	0.74	15.3	4.66	0.15	1.03	3.02	5.29	2.5	0.18	99.97		67.1201	0.740222	15.3046	4.6614	0.150045	1.03031	3.02091	5.29159	2.50075	0.180054	100					86	136	56	287	11		499	25	59
SAVP	6	T	Santorini	Y-2	Cape Riva	67.3	0.74	15.3	4.69	0.15	1.02	3.08	5.11	2.5	0.18	100.07		67.2529	0.739482	15.2893	4.68672	0.149895	1.01929	3.07785	5.10643	2.49825	0.179874	100					81	138	58	281	11		488	28	46
SAVP	6	T	Santorini	Y-2	Cape Riva	67.3	0.76	15.3	4.64	0.16	0.96	3.06	5.22	2.47	0.18	100.05		67.2664	0.75962	15.2924	4.63768	0.15992	0.95952	3.05847	5.21739	2.46877	0.17991	100					81	138	59	289	12		492	24	61
SAVP	6	T	Santorini	Y-2	Cape Riva	67.4	0.7	15.7	4.58	0.15	1.05	2.84	4.81	2.58	0.19	100		67.4	0.7	15.7	4.58	0.15	1.05	2.84	4.81	2.58	0.19	100					74	127	55	253	10		430	25	50
SAVP	8	T	Santorini	Y-2	Cape Riva	70.86	0.39	14.09	3.06	0.07	0.36	1.57	4.86	2.54		97.8		72.454	0.398773	14.407	3.12883	0.0715746	0.368098	1.60532	4.96933	2.59714		100				13.7	106	103	46	280	10	3.9	469	33.4	72		33	7.33	1.5		1.1
SAVP	8	T	Santorini	Y-2	Cape Riva	72.17	0.57	14.54	3.87	0.14	0.45	1.86	5.56	2.87		102.03		70.7341	0.558659	14.2507	3.793	0.137215	0.441047	1.82299	5.44938	2.8129		100				14.8	92	112	42	269	11	4	442	29.7	70		30	7.41	1.5		1.1
SAVP	9	M	Santorini	Y-2	Cape Riva	72.1	0.41	14.4	3.11	0.09	0.46	1.72	4.87	2.75	0.07	99.98		72.1144	0.410082	14.4029	3.11062	0.090018	0.460092	1.72034	4.87097	2.75055	0.070014	100				12.01	106.62	77.35	48.3	292.56	10.9	3.32	426.22	28	55.84	6.46	26.47	6.04	1.05	6.5	1.1	7.95	1.66
SAVP	9	M	Santorini	Y-2	Cape Riva	71.99	0.42	14.4	3.16	0.1	0.46	1.78	4.81	2.83	0.05	100		71.99	0.42	14.4	3.16	0.1	0.46	1.78	4.81	2.83	0.05	100				11.84	104.47	71.26	51.49	95.91	11.01	3.23	442.97	27.7	60.05	6.58	27.6	6.5	1.15	7.18	1.19	8.24	1.73
SAVP	9	M	Santorini	Y-2	Cape Riva	71.98	0.41	14.41	3.18	0.09	0.46	1.77	4.74	2.9	0.03	99.97		72.0016	0.410123	14.4143	3.18095	0.090027	0.460138	1.77053	4.74142	2.90087	0.030009	100				14.35	100.81	80.99	63.25	360.87	12.02	3.23	466.07	31.76	61.01	7.44	30.75	7.52	1.31	8.15	1.37	10.15	2.19
SAVP	9	M	Santorini	Y-2	Cape Riva	72.23	0.42	14.37	3.12	0.12	0.45	1.7	4.86	2.84	0.06	100.17		72.1074	0.419287	14.3456	3.11471	0.119796	0.449236	1.69711	4.85175	2.83518	0.0598982	100				14.93	103.2	85.56	65.76	381.84	12.33	3.16	499.41	33.38	64.83	7.73	32.54	7.87	1.43	8.56	1.48	10.93	2.25
SAVP	10	M	Santorini	Y-2	Cape Riva	71.3	0.48	14.24	3.15	0.12	0.43	1.8	4.34	2.82	0.09	98.77		72.1879	0.485978	14.4173	3.18923	0.121494	0.435355	1.82242	4.39405	2.85512	0.0911208	100
SAVP	15	T	Santorini	Y-2	Cape Riva	71.4673	0.451309	14.5522	3.17921	0.130378	0.421221	1.76512	5.04463	2.98867		100		71.4673	0.451309	14.5522	3.17921	0.130378	0.421221	1.76512	5.04463	2.98867		100					104.1	77.2	48.1	282.1	11.4		467.6	26.7	55.6	6	25.9	0	1.1	6.7		7.6
SAVP	15	T	Santorini	Y-2	Cape Riva	66.4325	0.682388	15.6147	5.0878	0.160562	1.09383	3.95384	4.71651	2.2579		100		66.4325	0.682388	15.6147	5.0878	0.160562	1.09383	3.95384	4.71651	2.2579		100					92.3	51.3	31	200.1	8.4		337.2	19.3	40.8	4.4	20.2	0	0	0		5.5
SAVP	15	T	Santorini	Y-2	Cape Riva	69.3434	0.451128	16.2306	2.89724	0.0601504	0.441103	3.12783	5.02256	2.42607		100		69.3434	0.451128	16.2306	2.89724	0.0601504	0.441103	3.12783	5.02256	2.42607		100					68.8	156.3	37.9	195.3	7.9		337.5	19.8	42.6	4.9	20.2	5.1	1.1	0		6.4
SAVP	15	T	Santorini	Y-2	Cape Riva	69.311	0.581687	14.4118	4.15204	0.180523	1.033	2.67776	4.89419	2.758		100		69.311	0.581687	14.4118	4.15204	0.180523	1.033	2.67776	4.89419	2.758		100					89.3	59.1	37.5	230.8	9.1		383.8	21.9	45.5	4.9	21.1	5.8	1	5.9		5.8
SAVP	15	T	Santorini	Y-2	Cape Riva	71.4973	0.491425	14.3617	3.08896	0.120349	0.431251	1.86541	5.15495	2.98867		100		71.4973	0.491425	14.3617	3.08896	0.120349	0.431251	1.86541	5.15495	2.98867		100					103.5	67.7	41.9	268	10.8		434.7	25	53	5.9	25.9	0	1.1	0		7.3
SAVP	15	T	Santorini	Y-2	Cape Riva	65.3483	0.943586	14.997	6.27384	0.150572	1.38526	4.27625	4.3164	2.30877		100		65.3483	0.943586	14.997	6.27384	0.150572	1.38526	4.27625	4.3164	2.30877		100					93.2	66.6	42.9	264.4	9.9		429.4	25.2	52.2	6.1	23.3	0	0	0		7.3
SAVP	15	T	Santorini	Y-2	Cape Riva	70.8542	0.551433	14.618	3.51915	0.0902345	0.651694	2.29597	4.60196	2.81732		100		70.8542	0.551433	14.618	3.51915	0.0902345	0.651694	2.29597	4.60196	2.81732		100
SAVP	15	T	Santorini	Y-2	Cape Riva	70.8254	0.501454	14.6224	3.57035	0.100291	0.531542	2.2766	4.72369	2.84826		100		70.8254	0.501454	14.6224	3.57035	0.100291	0.531542	2.2766	4.72369	2.84826		100
SAVP	15	T	Santorini	Y-2	Cape Riva	70.8237	0.531755	14.6383	3.60189	0.0702318	0.561854	1.99659	4.87609	2.89957		100		70.8237	0.531755	14.6383	3.60189	0.0702318	0.561854	1.99659	4.87609	2.89957		100
SAVP	15	T	Santorini	Y-2	Cape Riva	71.2852	0.481589	14.5581	3.2106	0.110364	0.441457	1.78589	5.16705	2.95977		100		71.2852	0.481589	14.5581	3.2106	0.110364	0.441457	1.78589	5.16705	2.95977		100
SAVP	15	T	Santorini	Y-2	Cape Riva	62.8689	0.883357	16.0209	6.59507	0.0903433	2.27865	5.64144	4.17587	1.44549		100		62.8689	0.883357	16.0209	6.59507	0.0903433	2.27865	5.64144	4.17587	1.44549		100					91.7	59.1	34.6	216.8	8.9		358.9	21.1	42.9	5.4	19.7	9.3	1.3	10.8		5.7
SAVP	15	T	Santorini	Y-2	Cape Riva	65.9344	0.692146	15.7388	5.0958	0.110342	1.36423	3.9021	4.89517	2.26702		100		65.9344	0.692146	15.7388	5.0958	0.110342	1.36423	3.9021	4.89517	2.26702		100					91.7	63.2	40.2	233	9.7		392.8	21.6	48.4	5.5	23.1	6.2	0.9	5.3		6.4
SAVP	15	T	Santorini	Y-2	Cape Riva	64.4075	0.84219	15.4301	5.94546	0.180469	1.71446	4.9228	4.48166	2.0754		100		64.4075	0.84219	15.4301	5.94546	0.180469	1.71446	4.9228	4.48166	2.0754		100					95.8	73.6	36.8	210.8	8.6		353.3	21.4	49.4	5.6	22.6	5.4	1.1	0		5.7
SAVP	15	T	Santorini	Y-2	Cape Riva	64.1496	0.742078	16.6166	5.6458	0.100281	1.30365	5.1444	4.40232	1.8953		100		64.1496	0.742078	16.6166	5.6458	0.100281	1.30365	5.1444	4.40232	1.8953		100					89.4	65.8	40	246	9.4		389.5	21.5	47.2	5.4	18.3	0	0.9	0		5.9
SAVP	15	T	Santorini	Y-2	Cape Riva	64.828	0.762211	15.3746	5.66644	0.140407	1.81527	4.71367	4.64347	2.05596		100		64.828	0.762211	15.3746	5.66644	0.140407	1.81527	4.71367	4.64347	2.05596		100					98.5	71.9	39.5	245.6	8.1		389.6	22	48.7	4.8	20	0	1.1	0		6.8
SAVP	15	T	Santorini	Y-2	Cape Riva	63.7184	0.762134	16.4962	5.45527	0.110309	1.75491	5.55555	4.51263	1.63458		100		63.7184	0.762134	16.4962	5.45527	0.110309	1.75491	5.55555	4.51263	1.63458		100					93.5	65.1	43.8	250.6	8.2		387.7	21.8	47.1	4.8	20.5	0	0	0		6
SAVP	15	T	Santorini	Y-2	Cape Riva	68.7406	0.521827	15.133	4.16457	0.0702459	0.852986	2.86001	4.86703	2.78976		100		68.7406	0.521827	15.133	4.16457	0.0702459	0.852986	2.86001	4.86703	2.78976		100					102.5	70.7	43.4	264.5	10.7		423	24.9	52.4	5.8	22.8	7	1	0		7.2
SAVP	15	T	Santorini	Y-2	Cape Riva	71.2852	0.441457	14.5581	3.19053	0.170563	0.431424	1.77585	5.14698	2.9999		100		71.2852	0.441457	14.5581	3.19053	0.170563	0.431424	1.77585	5.14698	2.9999		100					96.5	68.2	41.4	263	10		422.5	24.4	51.9	6.3	27.4	7.4	1.1	0		7.4
SAVP	15	T	Santorini	Y-2	Cape Riva	71.4443	0.431294	14.5537	3.09929	0.130391	0.421264	1.71515	5.20561	2.99899		100		71.4443	0.431294	14.5537	3.09929	0.130391	0.421264	1.71515	5.20561	2.99899		100					110.6	79.3	49.8	304	11.6		476.8	27.9	59.4	6.8	28.6	7.3	1.2	7.1		8.1
SAVP	15	T	Santorini	Y-2	Cape Riva	71.3211	0.451399	14.495	3.28017	0.100311	0.441368	1.86578	5.11586	2.92908		100		71.3211	0.451399	14.495	3.28017	0.100311	0.441368	1.86578	5.11586	2.92908		100					107.8	65.4	38.3	244.6	9.8		406.1	22.7	49.6	5.3	22.8	0	0	0		7
SAVP	15	T	Santorini	Y-2	Cape Riva	64.2334	0.832248	15.3815	6.05636	0.250677	1.95528	4.97343	4.37181	1.94526		100		64.2334	0.832248	15.3815	6.05636	0.250677	1.95528	4.97343	4.37181	1.94526		100
SAVP	15	T	Santorini	Y-2	Cape Riva	64.4375	0.902346	15.39	5.75496	0.120313	1.81472	4.87267	4.30118	2.40626		100		64.4375	0.902346	15.39	5.75496	0.120313	1.81472	4.87267	4.30118	2.40626		100
SAVP	15	T	Santorini	Y-2	Cape Riva	71.2252	0.521355	14.7183	3.09805	0.170443	0.401042	1.85483	5.07319	2.93764		100		71.2252	0.521355	14.7183	3.09805	0.170443	0.401042	1.85483	5.07319	2.93764		100
SAVP	15	T	Santorini	Y-2	Cape Riva	71.4443	0.471414	14.5938	3.11936	0.100301	0.431294	1.75527	5.01504	3.06921		100		71.4443	0.471414	14.5938	3.11936	0.100301	0.431294	1.75527	5.01504	3.06921		100
SAVP	15	T	Santorini	Y-2	Cape Riva	71.3713	0.431035	14.3745	3.06736	0.0801925	0.441059	1.81435	5.49319	2.92702		100		71.3713	0.431035	14.3745	3.06736	0.0801925	0.441059	1.81435	5.49319	2.92702		100
SAVP	15	T	Santorini	Y-2	Cape Riva	71.5747	0.421264	14.5436	3.00903	0.130391	0.431294	1.85557	5.06519	2.96891		100		71.5747	0.421264	14.5436	3.00903	0.130391	0.431294	1.85557	5.06519	2.96891		100
SAVP	15	T	Santorini	Y-2	Cape Riva	71.3813	0.431337	14.505	3.35039	0.0902798	0.411275	1.82565	5.0958	2.90902		100		71.3813	0.431337	14.505	3.35039	0.0902798	0.411275	1.82565	5.0958	2.90902		100
SAVP	15	T	Santorini	Y-2	Cape Riva	71.3268	0.451308	14.482	3.17922	0.160465	0.441279	1.8253	5.11483	3.01875		100		71.3268	0.451308	14.482	3.17922	0.160465	0.441279	1.8253	5.11483	3.01875		100					107.7	62	37.1	252.1	9.6		400.9	23	49.3	5.9	23.3	5.8	0	0		6.2
SAVP	15	T	Santorini	Y-2	Cape Riva	71.1764	0.501454	14.6124	3.13911	0.130378	0.471367	1.84535	5.175	2.94855		100		71.1764	0.501454	14.6124	3.13911	0.130378	0.471367	1.84535	5.175	2.94855		100					66	192.5	37.9	199.3	7.4		324.7	19.6	43	5.3	23.3	5.9	1.3	5.8		6.7
SAVP	15	T	Santorini	Y-2	Cape Riva	71.3669	0.461338	14.7027	3.11904	0.120349	0.411192	1.78518	5.11483	2.91846		100		71.3669	0.461338	14.7027	3.11904	0.120349	0.411192	1.78518	5.11483	2.91846		100					69.2	178.8	39.8	223.8	8.6		373.3	22.5	46.1	5.4	21.2	5.3	1.4	6.1		7
SAVP	15	T	Santorini	Y-2	Cape Riva	71.5661	0.481251	14.5779	2.93764	0.0601564	0.421095	1.8849	5.01304	3.05795		100		71.5661	0.481251	14.5779	2.93764	0.0601564	0.421095	1.8849	5.01304	3.05795		100					59	183.8	34.8	172.8	6.7		296.5	17.4	37.7	4.5	19.9	0	1.2	0		5.9
SAVP	15	T	Santorini	Y-2	Cape Riva	71.4272	0.461338	14.4619	3.23939	0.140407	0.431251	1.77515	5.11483	2.94855		100		71.4272	0.461338	14.4619	3.23939	0.140407	0.431251	1.77515	5.11483	2.94855		100					96.5	122.3	47.5	276.2	10.2		440.9	27	56.9	6.4	29	7.7	1.3	5.7		8.4
SAVP	15	T	Santorini	Y-2	Cape Riva	71.291	0.441368	14.6153	2.9993	0.150466	0.46143	1.89588	5.17604	2.9692		100		71.291	0.441368	14.6153	2.9993	0.150466	0.46143	1.89588	5.17604	2.9692		100					101.3	106.4	48.7	299.7	10.1		462.5	27.7	59.3	6.5	27.7	7.1	1.4	6.4		8.9
SAVP	15	T	Santorini	Y-2	Cape Riva	71.3125	0.451218	14.5293	3.24877	0.130352	0.41111	1.85501	5.11381	2.94796		100		71.3125	0.451218	14.5293	3.24877	0.130352	0.41111	1.85501	5.11381	2.94796		100					80.9	104.3	49.5	254.5	9.7		398.8	23.3	52.6	6	27.4	7	1.1	0		7.9
SAVP	15	T	Santorini	Y-2	Cape Riva	71.2065	0.481396	14.6725	3.14913	0.170494	0.461338	1.79521	5.08475	2.97864		100		71.2065	0.481396	14.6725	3.14913	0.170494	0.461338	1.79521	5.08475	2.97864		100					81.4	95.9	38.7	222.1	9.5		373.9	21.2	46.5	4.9	21.8	0	0	0		6.2
SAVP	15	T	Santorini	Y-2	Cape Riva	71.1949	0.481589	14.548	3.26076	0.150497	0.431424	1.94642	5.05669	2.92967		100		71.1949	0.481589	14.548	3.26076	0.150497	0.431424	1.94642	5.05669	2.92967		100					52.9	168.8	37.7	168	6		261.1	16.5	34.8	4.4	18.6	0	1.3	0		7.3
SAVP	15	T	Santorini	Y-2	Cape Riva	71.301	0.441368	14.6454	3.14976	0.100311	0.411275	1.78554	5.10583	3.05949		100		71.301	0.441368	14.6454	3.14976	0.100311	0.411275	1.78554	5.10583	3.05949		100
SAVP	15	T	Santorini	Y-2	Cape Riva	71.4902	0.421179	14.5708	3.09868	0.140393	0.431208	1.78499	5.06418	2.99839		100		71.4902	0.421179	14.5708	3.09868	0.140393	0.431208	1.78499	5.06418	2.99839		100
SAVP	15	T	Santorini	Y-2	Cape Riva	71.2653	0.461199	14.6781	3.15821	0.0802086	0.441147	1.77461	5.14338	2.99779		100		71.2653	0.461199	14.6781	3.15821	0.0802086	0.441147	1.77461	5.14338	2.99779		100
SAVP	15	T	Santorini	Y-2	Cape Riva	64.9388	0.701825	15.6006	5.6547	0.160417	1.53399	4.77241	4.39142	2.24583		100		64.9388	0.701825	15.6006	5.6547	0.160417	1.53399	4.77241	4.39142	2.24583		100
SAVP	15	T	Santorini	Y-2	Cape Riva	71.026	0.461338	14.6023	3.22937	0.140407	0.521513	1.88547	5.24522	2.88838		100		71.026	0.461338	14.6023	3.22937	0.140407	0.521513	1.88547	5.24522	2.88838		100					84.4	123.5	41.9	246.9	9		395.2	22.8	50.6	5.9	24.7	6.2	1.2	6		7.4
SAVP	15	T	Santorini	Y-2	Cape Riva	71.3097	0.491376	14.4905	3.02848	0.150421	0.481348	1.88528	5.27477	2.88809		100		71.3097	0.491376	14.4905	3.02848	0.150421	0.481348	1.88528	5.27477	2.88809		100					75.1	139.1	37.1	204.1	8.5		351.9	21.1	43.8	4.9	20.7	0	1.2	0		6.5
SAVP	15	T	Santorini	Y-2	Cape Riva	71.4186	0.43138	14.5064	3.16011	0.210674	0.441412	1.95626	4.95586	2.91934		100		71.4186	0.43138	14.5064	3.16011	0.210674	0.441412	1.95626	4.95586	2.91934		100					54.9	212.3	23.5	133.4	5.7		276.1	14.3	30.5	3.7	14.7	4.2	0.8	4.7		4
SAVP	15	T	Santorini	Y-2	Cape Riva	71.1907	0.481493	14.5351	3.26011	0.150466	0.401244	1.85575	5.15598	2.96921		100		71.1907	0.481493	14.5351	3.26011	0.150466	0.401244	1.85575	5.15598	2.96921		100					93.5	66.1	38.7	231.7	9.8		392.8	21.5	47.4	5.5	23.1	0	1	0		6
SAVP	15	T	Santorini	Y-2	Cape Riva	71.43	0.451264	14.4505	3.14881	0.170477	0.441235	1.85519	5.01404	3.03851		100		71.43	0.451264	14.4505	3.14881	0.170477	0.441235	1.85519	5.01404	3.03851		100					98.9	62.8	40	250.1	10		401.5	24.3	49	5.7	23.1	0	0	0		6.9
SAVP	15	T	Santorini	Y-2	Cape Riva	71.1062	0.461338	14.6224	3.05887	0.130378	0.461338	1.85539	5.32545	2.97864		100		71.1062	0.461338	14.6224	3.05887	0.130378	0.461338	1.85539	5.32545	2.97864		100					91.4	59.1	39.8	250.6	9.8		386	21.8	45.3	4.9	22.6	4.9	0	0		5.2
SAVP	15	T	Santorini	Y-2	Cape Riva	71.4128	0.471272	14.4891	3.00812	0.130352	0.451218	1.91517	5.16394	2.95799		100		71.4128	0.471272	14.4891	3.00812	0.130352	0.451218	1.91517	5.16394	2.95799		100					92	85	41.3	243.4	10.2		429	24.1	51.9	6.3	23.1	0	0	0		6.8
SAVP	15	T	Santorini	Y-2	Cape Riva	71.6005	0.431207	14.4304	3.12876	0.110309	0.47132	1.84516	5.07421	2.90814		100		71.6005	0.431207	14.4304	3.12876	0.110309	0.47132	1.84516	5.07421	2.90814		100					98.6	61.1	37.4	224.4	9.8		383.8	20.1	46.2	5.1	20.7	7.2	1.4	9.6		6.4
SAVP	15	T	Santorini	Y-2	Cape Riva	71.0175	0.451128	14.6366	3.29824	0.150376	0.451128	1.77443	5.07269	3.14787		100		71.0175	0.451128	14.6366	3.29824	0.150376	0.451128	1.77443	5.07269	3.14787		100					100.4	50.7	31.8	197.2	8.3		324.8	18.3	37.6	4.5	20	0	1.1	0		5.1
SAVP	15	T	Santorini	Y-2	Cape Riva	71.1878	0.441413	14.6569	3.13002	0.180578	0.461477	1.89606	5.09631	2.94944		100		71.1878	0.441413	14.6569	3.13002	0.180578	0.461477	1.89606	5.09631	2.94944		100
SAVP	15	T	Santorini	Y-2	Cape Riva	70.8225	0.471414	14.6339	3.4002	0.110331	0.471414	2.01604	5.15547	2.91875		100		70.8225	0.471414	14.6339	3.4002	0.110331	0.471414	2.01604	5.15547	2.91875		100
SAVP	15	T	Santorini	Y-2	Cape Riva	71.1637	0.501153	14.784	3.09713	0.0902075	0.420968	1.76406	5.15185	3.02696		100		71.1637	0.501153	14.784	3.09713	0.0902075	0.420968	1.76406	5.15185	3.02696		100
SAVP	15	T	Santorini	Y-2	Cape Riva	70.8768	0.511637	14.5866	3.33066	0.0802569	0.451445	1.98636	5.13644	3.03973		100		70.8768	0.511637	14.5866	3.33066	0.0802569	0.451445	1.98636	5.13644	3.03973		100
SAVP	15	T	Santorini	Y-2	Cape Riva	71.5762	0.481589	14.7086	2.94973	0.100331	0.401324	1.75579	4.99649	3.03		100		71.5762	0.481589	14.7086	2.94973	0.100331	0.401324	1.75579	4.99649	3.03		100
SAVP	15	T	Santorini	Y-2	Cape Riva	71.3239	0.461384	14.3631	3.36007	0.0902708	0.441324	1.80542	5.21565	2.93881		100		71.3239	0.461384	14.3631	3.36007	0.0902708	0.441324	1.80542	5.21565	2.93881		100
SAVP	17	M	Santorini	Y-2	Cape Riva	68.77	0.3951	13.89	2.87	0.1145	0.4087	1.85	4.82	2.91	0.0407	96.0691		71.5839	0.411266	14.4583	2.98743	0.119185	0.425423	1.9257	5.01722	3.02907	0.0423653	99.9999			26.9	14.09	113.51	86.76	58.91	359.89	12.61	3.55	525.46	31.95	65.8	7.86	31.33	7.1	1.414	8.93	1.423	9.52	2.12
SAVP	17	M	Santorini	Y-2	Cape Riva	67.97	0.4642	14.15	3.2	0.1205	0.4559	1.89	4.98	2.78	0.144	96.1547		70.6882	0.482764	14.7159	3.32797	0.125319	0.474132	1.96558	5.17915	2.89117	0.149759	99.9999			24.98	12.64	107.4	81.05	51.89	321.26	12.99	3.23	499.72	32.6	65.32	7.35	29.88	6.9	1.244	6.77	1.167	8.78	1.645
SAVP	17	M	Santorini	Y-2	CapeRiva	66.83	0.4116	13.7	2.99	0.0611	0.4256	1.79	4.83	2.81	0.0513	93.8996		71.1718	0.438341	14.5901	3.18425	0.0650695	0.45325	1.90629	5.14379	2.99256	0.0546328	100			29.47	14.69	112.83	87.7	58.24	348.92	12.65	3.51	537.68	32.25	65.89	7.57	33.02	7.66	1.456	7.33	1.345	9.93	2.16
SAVP	17	M	Santorini	Y-2	CapeRiva	68.3	0.4709	13.96	2.97	0.0873	0.4285	1.8	4.81	2.82	0.0423	95.6891		71.377	0.492115	14.5889	3.1038	0.091233	0.447804	1.88109	5.0267	2.94704	0.0442057	99.9999			27.35	13.76	113.76	84.57	56.64	347.16	12.71	3.45	524.8	31.37	65.18	7.44	30.01	7.56	1.274	7.2	1.34	8.91	2.1
SAVP	17	M	Santorini	Y-2	CapeRiva	68.63	0.4279	14.09	2.97	0.0718	0.4362	1.86	5.36	2.82	0.0516	96.7176		70.9592	0.442422	14.5682	3.0708	0.0742367	0.451004	1.92312	5.54191	2.91571	0.0533512	99.9999
SAVP	17	M	Santorini	Y-2	CapeRiva	68.46	0.395	14.16	3.01	0.1711	0.4227	1.78	5.07	2.79	0.0582	96.317		71.0778	0.410104	14.7015	3.1251	0.177643	0.438863	1.84806	5.26387	2.89668	0.0604255	100
SAVP	17	M	Santorini	Y-2	CapeRiva	67.96	0.4287	14.11	3.07	0.0888	0.4482	1.84	5.35	2.79	0.0388	96.1245		70.7	0.445984	14.6789	3.19377	0.0923802	0.46627	1.91418	5.5657	2.90249	0.0403643	100
SAVP	17	M	Santorini	Y-2	CapeRiva	68.17	0.4216	13.97	3.01	0.0882	0.4747	1.86	4.99	2.8	0.0609	95.8455		71.1249	0.439875	14.5755	3.14047	0.0920231	0.495276	1.94062	5.2063	2.92137	0.0635398	99.9999
SAVP	17	M	Santorini	Y-2	CapeRiva	68.67	0.4093	14.28	3.27	0.1202	0.4097	1.76	5.11	2.82	0.0727	96.922		70.8508	0.422298	14.7335	3.37385	0.124017	0.422711	1.81589	5.27228	2.90956	0.0750088	99.9999
SAVP	17	M	Santorini	Y-2	CapeRiva	68.18	0.4006	13.99	2.96	0.0837	0.452	1.76	5.11	2.75	0.0733	95.7597		71.1991	0.418339	14.6095	3.09107	0.0874063	0.472015	1.83793	5.33627	2.87177	0.0765458	99.9999
SAVP	17	M	Santorini	Y-2	CapeRiva	68.79	0.4199	13.92	3.27	0.1608	0.4493	1.78	5.12	2.78	0.0576	96.7477		71.1025	0.434015	14.3879	3.37993	0.166206	0.464404	1.83984	5.29212	2.87345	0.0595363	99.9999
SAVP	17	M	Santorini	Y-2	CapeRiva	67.25	0.4212	13.74	2.93	0.1338	0.4472	1.79	5.15	2.84	0.051	94.7533		70.9738	0.444523	14.5008	3.09224	0.141209	0.471962	1.88912	5.43517	2.99726	0.053824	99.9999
SAVP	17	M	Santorini	Y-2	CapeRiva	67	0.4178	13.73	2.9	0.049	0.4635	1.85	5.1	2.76	0.0231	94.2935		71.0547	0.443085	14.5609	3.0755	0.0519654	0.49155	1.96196	5.40864	2.92703	0.024498	99.9999
SAVP	17	M	Santorini	Y-2	CapeRiva	66.91	0.422	13.64	3.11	0.0827	0.4499	1.78	5.26	2.78	0.0574	94.4921		70.8102	0.446598	14.4351	3.29128	0.0875205	0.476124	1.88376	5.5666	2.94204	0.0607458	99.9999
SAVP	17	M	Santorini	Y-2	CapeRiva	67.51	0.4397	13.69	2.99	0.0798	0.4577	1.81	4.66	2.82	0.0725	94.5298		71.4166	0.465144	14.4822	3.16302	0.0844178	0.484186	1.91474	4.92966	2.98319	0.0766954	99.9999
SAVP	17	M	Santorini	Y-2	CapeRiva	67.41	0.4266	13.95	3.19	0.0874	0.4233	1.88	5.09	2.82	0.06	95.3373		70.7068	0.447464	14.6323	3.34601	0.0916745	0.444003	1.97195	5.33894	2.95792	0.0629344	100
SAVP	17	M	Santorini	Y-2	CapeRiva	69.7	0.4276	14.09	2.87	0.1111	0.4222	1.79	5.06	2.93	0.0357	97.4366		71.5337	0.438849	14.4607	2.94551	0.114023	0.433307	1.83709	5.19312	3.00708	0.0366392	100			25.96	14.71	112.71	81.64	58.21	349.51	12.03	3.5	531.74	31.08	62.83	7.71	29.55	7.96	1.47	8.06	1.308	8.41	2.03
SAVP	17	M	Santorini	Y-2	CapeRiva	69.95	0.4505	14.04	3.09	0.1082	0.439	1.73	4.96	3.04	0.0379	97.8457		71.4901	0.460419	14.3491	3.15803	0.110582	0.448666	1.76809	5.06921	3.10693	0.0387345	99.9999			32.51	13.86	118.59	82.12	56.77	345.92	12.97	3.69	528.23	31.08	65.52	7.59	30.36	7.82	1.205	7.93	1.282	9.49	1.947
SAVP	17	M	Santorini	Y-2	CapeRiva	69.2	0.4226	13.88	3.17	0.1296	0.4012	1.68	5	2.86	0.0535	96.7969		71.4899	0.436584	14.3393	3.2749	0.133889	0.414476	1.73559	5.16545	2.95464	0.0552704	100			29.32	13.33	112.75	82.6	61.36	371.86	12.19	3.36	518.18	33.55	65.09	7.38	31.42	7.14	1.22	8.27	1.57	9.71	2.18
SAVP	17	M	Santorini	Y-2	CapeRiva	69.56	0.4229	14.12	3.01	0.1557	0.364	1.74	4.99	2.87	0.0228	97.2554		71.523	0.434834	14.5185	3.09494	0.160094	0.374272	1.7891	5.13082	2.95099	0.0234434	100			26.91	13.48	117.37	83.01	55.83	340.44	11.97	3.54	519.64	30.32	65.25	7.65	30.72	7.77	1.355	7.94	1.297	8.9	1.96
SAVP	17	M	Santorini	Y-2	CapeRiva	69.67	0.4544	14.19	2.92	0.0561	0.4058	1.71	5.11	3.01	0.0585	97.5849		71.3942	0.465646	14.5412	2.99227	0.0574884	0.415843	1.75232	5.23647	3.08449	0.0599478	99.9999			33.55	13.84	110.13	82.08	59.24	352.6	12.48	3.32	520.82	31.78	65.31	7.89	31.16	6.95	1.263	8.36	1.379	9.01	2.27
SAVP	17	M	Santorini	Y-2	CapeRiva	70.13	0.4116	14.2	3.12	0.1122	0.393	1.83	5.61	2.89	0.0762	98.773		71.0012	0.416713	14.3764	3.15876	0.113594	0.397882	1.85273	5.67969	2.9259	0.0771466	100
SAVP	17	M	Santorini	Y-2	CapeRiva	69.46	0.425	14.05	2.92	0.0367	0.4168	1.89	5.16	2.86	0.0563	97.2749		71.4059	0.436906	14.4436	3.0018	0.0377281	0.428476	1.94295	5.30455	2.94012	0.0578772	99.9999
SAVP	17	M	Santorini	Y-2	CapeRiva	69.2	0.4198	13.85	2.87	0.0393	0.364	1.66	4.73	2.89	0.1018	96.1249		71.9897	0.436723	14.4083	2.9857	0.0408843	0.378674	1.72692	4.92068	3.00651	0.105904	100
SAVP	17	M	Santorini	Y-2	CapeRiva	69.06	0.4406	14.02	2.91	0.0543	0.4119	1.75	5.17	2.9	0.015	96.7318		71.3933	0.455486	14.4937	3.00832	0.0561346	0.425817	1.80913	5.34467	2.99798	0.0155068	100
SAVP	17	M	Santorini	Y-2	CapeRiva	69.59	0.4561	13.95	2.93	0.2215	0.4151	1.73	5.09	2.85	0.039	97.2718		71.5418	0.468892	14.3413	3.01218	0.227712	0.426742	1.77852	5.23276	2.92993	0.0400938	99.9999
SAVP	17	M	Santorini	Y-2	CapeRiva	69.19	0.4657	13.95	3.01	0.0909	0.4345	1.66	5.23	2.88	0.1046	97.0158		71.3183	0.480025	14.3791	3.10259	0.0936961	0.447865	1.71106	5.39087	2.96859	0.107817	99.9999
SAVP	17	M	Santorini	Y-2	CapeRiva	68.19	0.4232	13.81	3.04	0.1056	0.4071	1.72	4.95	2.84	0.0488	95.5348		71.3771	0.44298	14.4555	3.18209	0.110536	0.426127	1.80039	5.18136	2.97274	0.0510809	99.9999
SAVP	17	M	Santorini	Y-2	CapeRiva	64.93	0.457	13.22	2.68	0.1508	0.3876	1.63	4.73	2.77	0.1015	91.057		71.307	0.501883	14.5184	2.94321	0.165611	0.425667	1.79009	5.19455	3.04205	0.111469	99.9999
SAVP	17	M	Santorini	Y-2	CapeRiva	68.91	0.4105	13.84	3.1	0.211	0.3607	1.73	5.48	2.92	0.0548	97.0171		71.0287	0.423121	14.2655	3.19531	0.217487	0.37179	1.78319	5.64849	3.00978	0.0564849	99.9999
SAVP	17	M	Santorini	Y-2	CapeRiva	67.7	0.4137	13.81	3.04	0.1086	0.3926	1.7	4.91	2.87	0.0607	95.0056		71.259	0.435448	14.536	3.19981	0.114309	0.413239	1.78937	5.16812	3.02087	0.063891	100
SAVP	17	M	Santorini	Y-2	CapeRiva	67.61	0.4751	13.71	2.93	0.1711	0.4357	1.63	5.15	2.83	0.0795	95.0214		71.1524	0.499993	14.4283	3.08352	0.180065	0.458528	1.7154	5.41983	2.97828	0.0836654	100
SAVP	3	M	Santorini	Y-4	Cape Tripiti	69.76	0.65	14.79	3.95	0.13	0.64	2.18	4.9	3.01		100.01		69.753	0.649935	14.7885	3.94961	0.129987	0.639936	2.17978	4.89951	3.0097		100
SAVP	3	M	Santorini	Y-4	Cape Tripiti	69.66	0.69	14.99	3.99	0.1	0.64	2.21	4.6	3.12		100		69.66	0.69	14.99	3.99	0.1	0.64	2.21	4.6	3.12		100
SAVP	9	M	Santorini	Y-4	Cape Tripiti	70.98	0.52	15.3	2.55	0.07	0.79	2.51	4.07	3.12	0	99.91		71.0439	0.520468	15.3138	2.5523	0.0700631	0.790712	2.51226	4.07367	3.12281	0	100				8.5	94.9	214.17	21.13	186.86	8.87	2.67	632.15	31.68	59.16	5.93	22.2	4.09	0.92	3.64	0.6	3.94	0.84
SAVP	17	M	Santorini	Y-4	CapeTripiti	69.12	0.5726	14.81	4.05	0.0804	0.6017	2.24	5.11	3.08	0.1237	99.7885		69.2665	0.573814	14.8414	4.05858	0.0805704	0.602975	2.24475	5.12083	3.08653	0.123962	99.9999			28.18	14.14	117.01	106.57	52.75	334.41	13.26	3.69	550.81	34.67	69.37	7.92	33.06	7	1.343	7.48	1.24	8.5	1.94
SAVP	17	M	Santorini	Y-4	CapeTripiti	66.54	0.5741	14.76	3.73	0.1263	0.6054	2.43	4.98	2.98	0.1253	96.8512		68.7033	0.592765	15.2399	3.85127	0.130406	0.625083	2.509	5.14191	3.07688	0.129374	99.9999			30.33	15.23	121.35	109.52	57.9	358.03	14	3.78	588.86	36.69	72.59	8.51	35.86	8.08	1.4	8.4	1.331	8.47	2.04
SAVP	17	M	Santorini	Y-4	CapeTripiti	67.72	0.6544	14.43	3.92	0.0989	0.5326	2.21	4.83	2.94	0.1016	97.4076		69.5223	0.671816	14.814	4.02433	0.101532	0.546775	2.26882	4.95855	3.01824	0.104304	100.031			28.2	14.4	114.37	104.01	51.25	325.6	14.12	3.68	561.89	34.2	69.27	8	32.71	6.71	1.358	7.62	1.372	8.94	1.94
SAVP	17	M	Santorini	Y-4	CapeTripiti	68.66	0.5816	14.68	3.59	0.1113	0.5759	2.19	5.01	3.06	0.0828	98.5417		69.6761	0.590207	14.8972	3.64313	0.112947	0.584423	2.22241	5.08414	3.10528	0.0840253	99.9999			27.38	14.36	116.29	105.79	52.65	336.99	12.69	3.6	541.33	34.41	68.9	8.01	30.17	7.27	1.31	6.69	1.278	8.46	1.91
SAVP	17	M	Santorini	Y-4	CapeTripiti	67.62	0.5826	14.47	3.57	0.0902	0.5761	2.19	4.95	3.03	0.1433	97.2223		69.5519	0.599245	14.8834	3.672	0.0927771	0.59256	2.25257	5.09142	3.11657	0.147394	99.9999
SAVP	17	M	Santorini	Y-4	CapeTripiti	68.72	0.5717	14.61	4.07	0.1021	0.5839	2.28	5.22	3.05	0.0815	99.2892		69.212	0.575793	14.7146	4.09914	0.102831	0.58808	2.29632	5.25737	3.07183	0.0820834	100
SAVP	17	M	Santorini	Y-4	CapeTripiti	68.67	0.6089	14.5	3.71	0.182	0.6109	2.3	5.05	3.04	0.1131	98.785		69.5146	0.616389	14.6783	3.75563	0.184238	0.618414	2.32829	5.11211	3.07739	0.114491	99.9999
SAVP	17	M	Santorini	Y-4	CapeTripiti	68.68	0.6049	14.8	3.94	0.1165	0.6078	2.28	4.97	3.06	0.1397	99.199		69.2346	0.609784	14.9195	3.97181	0.117441	0.612708	2.29841	5.01013	3.08471	0.140828	99.9999
SAVP	17	M	Santorini	Y-4	CapeTripiti	67.65	0.5646	14.24	3.75	0.0639	0.5853	2.16	4.85	2.89	0.1126	96.8665		69.8384	0.582864	14.7006	3.87131	0.0659671	0.604234	2.22987	5.00689	2.98349	0.116242	99.9999
SAVP	17	M	Santorini	Y-4	CapeTripiti	68.45	0.6172	14.48	3.89	0.0912	0.5465	2.18	5.03	3.09	0.1064	98.4814		69.5055	0.626717	14.7033	3.94998	0.0926063	0.554927	2.21362	5.10756	3.13765	0.108041	99.9999
SAVP	17	M	Santorini	Y-4	CapeTripiti	67.15	0.5441	14.27	3.6	0.1068	0.5681	2.19	4.89	2.96	0.1144	96.3934		69.6624	0.564458	14.8039	3.7347	0.110796	0.589356	2.27194	5.07296	3.07075	0.11868	100
SAVP	17	M	Santorini	Y-4	CapeTripiti	68.47	0.5905	14.74	3.7	0.145	0.623	2.27	5.14	3.02	0.0771	98.7757		69.3187	0.597819	14.9227	3.74586	0.146797	0.630722	2.29814	5.20371	3.05743	0.0780556	99.9999
SAVP	17	M	Santorini	Y-4	CapeTripiti	66.32	0.583	14.27	3.88	0.1142	0.5851	2.13	4.79	2.97	0.1365	95.7788		69.2429	0.608694	14.8989	4.051	0.119233	0.610887	2.22387	5.00111	3.10089	0.142516	100
SAVP	17	M	Santorini	Y-4	CapeTripiti	67.25	0.6195	14.65	4	0.1119	0.599	2.22	5.02	3.05	0.0432	97.5637		68.9293	0.63497	15.0158	4.09989	0.114694	0.613958	2.27544	5.14536	3.12616	0.0442788	99.9999
SAVP	17	M	Santorini	Y-4	CapeTripiti	66.87	0.5821	14.29	3.74	0.0728	0.6097	2.28	5.09	2.98	0.097	96.6117		69.2152	0.602515	14.7912	3.87117	0.0753532	0.631083	2.35996	5.26851	3.08451	0.100402	99.9999
SAVP	17	M	Santorini	Y-4	CapeTripiti	68.15	0.57	14.38	3.92	0.1048	0.5141	2.22	4.93	3.05	0.1268	97.9658		69.5651	0.581836	14.6786	4.0014	0.106976	0.524775	2.2661	5.03237	3.11333	0.129433	99.9999
SAVP	17	M	Santorini	Y-4	CapeTripiti	66.95	0.559	13.86	3.98	0.106	0.5578	2.21	5	2.94	0.1206	96.2834		69.5343	0.580578	14.395	4.13363	0.110092	0.579331	2.29531	5.193	3.05349	0.125255	100
SAVP	17	M	Santorini	Y-4	CapeTripiti	68.5	0.5824	14.48	3.98	0.135	0.6169	2.25	5.15	3.05	0.0764	98.8207		69.3175	0.58935	14.6528	4.0275	0.136611	0.624262	2.27685	5.21146	3.0864	0.0773117	100
SAVP	17	M	Santorini	Y-4	CapeTripiti	68.03	0.5929	14.39	4.01	0.1024	0.5801	2.25	5.14	3.02	0.1028	98.2183		69.2641	0.603655	14.651	4.08274	0.104258	0.590623	2.29082	5.23324	3.07478	0.104665	99.9999
SAVP	17	M	Santorini	Y-4	CapeTripiti	66.46	0.5907	14	3.83	0.0989	0.5993	2.2	4.85	2.98	0.1202	95.7291		69.4251	0.617054	14.6246	4.00087	0.103312	0.626037	2.29815	5.06638	3.11295	0.125563	100
SAVP	17	M	Santorini	Y-4	CapeTripiti	64.29	0.5855	13.59	3.56	0.1401	0.6043	1.95	4.88	2.96	0.1089	92.6689		69.376	0.631819	14.6651	3.84163	0.151183	0.652107	2.10427	5.26606	3.19417	0.117515	99.9999
SAVP	17	M	Santorini	Y-4	CapeTripiti	64.91	0.5844	13.6	3.6	0.0429	0.5482	2.1	5.05	2.91	0.1246	93.4702		69.4446	0.625226	14.5501	3.85149	0.045897	0.586497	2.24671	5.40279	3.11329	0.133305	99.9999
SAVP	17	M	Santorini	Y-4	CapeTripiti	64.63	0.5466	13.77	3.92	0.0529	0.5853	2.1	4.71	2.84	0.108	93.2629		69.2987	0.586085	14.7647	4.20317	0.0567214	0.627581	2.2517	5.05024	3.04516	0.115802	99.9999
SAVP	17	M	Santorini	Y-4	CapeTripiti	66.65	0.5637	14.16	3.86	0.0909	0.6417	2.21	5	2.98	0.099	96.2553		69.2429	0.58563	14.7109	4.01017	0.0944364	0.666665	2.29598	5.19452	3.09593	0.102851	100
SAVP	4	T	Santorini		Upper Scoria 2	66.8	0.73	15.2	5.01	0.14	0.97	3.12	4.76	3.09	0.19	100.01		66.7933	0.729927	15.1985	5.0095	0.139986	0.969903	3.11969	4.75952	3.08969	0.189981	100					128	126	58	319	12		379	30	61
SAVP	4	T	Santorini		Upper Scoria 2	59.2	1.22	15.6	8.32	0.16	2.68	6.43	4.42	1.67	0.24	99.94		59.2355	1.22073	15.6094	8.32499	0.160096	2.68161	6.43386	4.42265	1.671	0.240144	100					57	183	43	197	9		277	11	30
SAVP	6	T	Santorini		Upper Scoria 2	58.3	1.32	16.2	8.78	0.2	2.9	6.51	4.13	1.49	0.23	100.06		58.265	1.31921	16.1903	8.77474	0.19988	2.89826	6.5061	4.12752	1.48911	0.229862	100					67	189	42	199	7		322	18	48
SAVP	6	T	Santorini		Upper Scoria 2	58.4	1.32	16	8.77	0.18	3.03	6.64	3.95	1.49	0.2	99.98		58.4117	1.32026	16.0032	8.77175	0.180036	3.03061	6.64133	3.95079	1.4903	0.20004	100					58	189	42	180	7		201	19	41
SAVP	6	T	Santorini		Upper Scoria 2	58.6	1.28	16.1	8.62	0.17	2.9	6.52	4.22	1.49	0.19	100.09		58.5473	1.27885	16.0855	8.61225	0.169847	2.89739	6.51414	4.21621	1.48866	0.189829	100					60	196	42	187	8		220	21	43
SAVP	6	T	Santorini		Upper Scoria 2	58.6	1.29	16.1	8.62	0.17	2.95	6.52	3.99	1.54	0.19	99.97		58.6176	1.29039	16.1048	8.62259	0.170051	2.95089	6.52196	3.9912	1.54046	0.190057	100					61	187	42	180	8		212	20	49
SAVP	6	T	Santorini		Upper Scoria 2	58.8	1.25	16.1	8.16	0.17	2.71	6.29	4.7	1.63	0.21	100.02		58.7882	1.24975	16.0968	8.15837	0.169966	2.70946	6.28874	4.69906	1.62967	0.209958	100						181	43	200	7		271	12	46
SAVP	6	T	Santorini		Upper Scoria 2	58.8	1.32	15.8	8.84	0.17	2.96	6.55	3.74	1.6	0.23	100.01		58.7941	1.31987	15.7984	8.83912	0.169983	2.9597	6.54935	3.73963	1.59984	0.229977	100					60	183	40	188	8		287	22	48
SAVP	6	T	Santorini		Upper Scoria 2	59.1	1.22	15.6	8.31	0.16	2.67	6.42	4.41	1.66	0.24	99.79		59.2244	1.22257	15.6328	8.32749	0.160337	2.67562	6.43351	4.41928	1.66349	0.240505	100					57	183	43	197	9		277	11	30
SAVP	6	T	Santorini		Upper Scoria 2	59.1	1.25	16	8.35	0.17	2.8	6.27	4.22	1.62	0.2	99.98		59.1118	1.25025	16.0032	8.35167	0.170034	2.80056	6.27125	4.22084	1.62032	0.20004	100					65	185	43	189	7		286	13	44
SAVP	6	T	Santorini		Upper Scoria 2	59.2	1.24	15.9	8.2	0.21	2.71	6.22	4.39	1.69	0.24	100		59.2	1.24	15.9	8.2	0.21	2.71	6.22	4.39	1.69	0.24	100					61	183	47	201	8		238	16	44
SAVP	6	T	Santorini		Upper Scoria 2	59.2	1.25	16	8.33	0.16	2.78	6.3	4.22	1.57	0.19	100		59.2	1.25	16	8.33	0.16	2.78	6.3	4.22	1.57	0.19	100					58	190	42	191	7		288	20	38
SAVP	6	T	Santorini		Upper Scoria 2	59.3	1.24	16.2	8.04	0.16	2.62	5.96	4.58	1.72	0.21	100.03		59.2822	1.23963	16.1951	8.03759	0.159952	2.61921	5.95821	4.57863	1.71948	0.209937	100						176	43	200	7		274	12	48
SAVP	6	T	Santorini		Upper Scoria 2	59.5	1.3	15.8	9.37	0.18	2.6	6.13	4.12	1.69	0.23	100.92		58.9576	1.28815	15.656	9.28458	0.178359	2.5763	6.07412	4.08244	1.67459	0.227903	100					62	179	44	192	9		289	19	29
SAVP	6	T	Santorini		Upper Scoria 2	59.5	1.24	16	8.05	0.16	2.62	6.05	4.37	1.73	0.2	99.92		59.5476	1.24099	16.0128	8.05645	0.160128	2.6221	6.05484	4.3735	1.73139	0.20016	100						176	43	198	7		286	20	43
SAVP	6	T	Santorini		Upper Scoria 2	59.6	1.2	16	8.11	0.19	2.72	6.08	4.2	1.65	0.2	99.95		59.6298	1.2006	16.008	8.11406	0.190095	2.72136	6.08304	4.2021	1.65083	0.2001	100					65	177	43	192	8		295	21	48
SAVP	6	T	Santorini		Upper Scoria 2	59.8	1.2	16	8.03	0.16	2.63	5.99	4.4	1.67	0.2	100.08		59.7522	1.19904	15.9872	8.02358	0.159872	2.6279	5.98521	4.39648	1.66867	0.19984	100					64	182	46	201	8		312	18	40
SAVP	6	T	Santorini		Upper Scoria 2	60	1.22	16	7.21	0.17	2.78	6.19	4.62	1.59	0.22	100		60	1.22	16	7.21	0.17	2.78	6.19	4.62	1.59	0.22	100					54	175	45	200	7		279	24	60
SAVP	6	T	Santorini		Upper Scoria 2	60	1.18	15.5	7.71	0.16	2.47	6.28	4.48	1.94	0.23	99.95		60.03	1.18059	15.5078	7.71386	0.16008	2.47124	6.28314	4.48224	1.94097	0.230115	100					76	179	43	203	9		291	15	34
SAVP	6	T	Santorini		Upper Scoria 2	60.3	1.22	16.2	7.58	0.16	2.34	5.58	4.65	1.84	0.21	100.08		60.2518	1.21902	16.1871	7.57394	0.159872	2.33813	5.57554	4.64628	1.83853	0.209832	100						174	46	218	9		296	18	38
SAVP	6	T	Santorini		Upper Scoria 2	60.5	1.2	15.7	7.8	0.18	2.42	5.69	4.5	1.88	0.23	100.1		60.4396	1.1988	15.6843	7.79221	0.17982	2.41758	5.68432	4.4955	1.87812	0.22977	100					72	175	47	215	8		314	21	54
SAVP	6	T	Santorini		Upper Scoria 2	60.5	1.19	15.9	7.67	0.18	2.44	5.67	4.53	1.78	0.21	100.07		60.4577	1.18917	15.8889	7.66463	0.179874	2.43829	5.66603	4.52683	1.77875	0.209853	100					71	181	47	215	8		314	25	59
SAVP	6	T	Santorini		Upper Scoria 2	61.3	1.2	16	6.87	0.15	2.47	5.61	4.31	1.84	0.22	99.97		61.3184	1.20036	16.0048	6.87206	0.150045	2.47074	5.61168	4.31129	1.84055	0.220066	100					67	175	47	216	8		290	14	54
SAVP	6	T	Santorini		Upper Scoria 2	65.7	0.9	15.3	5.51	0.16	1.23	3.63	4.73	2.59	0.24	99.99		65.7066	0.90009	15.3015	5.51055	0.160016	1.23012	3.63036	4.73047	2.59026	0.240024	100					95	141	55	284	10		377	29	38
SAVP	6	T	Santorini		Upper Scoria 2	66.8	0.73	15.2	5.01	0.14	0.97	3.12	4.76	3.09	0.19	100.01		66.7933	0.729927	15.1985	5.0095	0.139986	0.969903	3.11969	4.75952	3.08969	0.189981	100					128	126	58	319	12		379	30	61
SAVP	6	T	Santorini		Upper Scoria 2	67	0.72	15.3	4.92	0.14	0.93	3.05	4.92	2.88	0.15	100.01		66.9933	0.719928	15.2985	4.91951	0.139986	0.929907	3.0497	4.91951	2.87971	0.149985	100					111	132	60	310	12		404	27	68
SAVP	15	T	Santorini		Upper Scoria 2	62.451	1.22453	15.0055	7.79886	0.220817	2.20817	5.57061	3.89441	1.62602		100		62.451	1.22453	15.0055	7.79886	0.220817	2.20817	5.57061	3.89441	1.62602		100					100	136	42	217.1	8.3		267.9	20.4	44.8	5.5	22.9	5.8	1.5	6.3		7.4
SAVP	15	T	Santorini		Upper Scoria 2	61.8397	1.27535	15.2641	8.08395	0.170717	2.08878	4.97088	4.26793	2.03856		100		61.8397	1.27535	15.2641	8.08395	0.170717	2.08878	4.97088	4.26793	2.03856		100					82.2	164.9	40.8	207.3	8		262	19.9	44.3	5.3	24.2	6.1	1.4	6.3		6.8
SAVP	15	T	Santorini		Upper Scoria 2	61.5354	1.16407	16.267	7.44606	0.130457	1.77621	5.75012	4.27496	1.65579		100		61.5354	1.16407	16.267	7.44606	0.130457	1.77621	5.75012	4.27496	1.65579		100					65.6	194.6	38	183.6	7.1		239.3	17.1	37.7	4.6	20.1	5.3	1.4	5.8		6.5
SAVP	15	T	Santorini		Upper Scoria 2	61.7647	1.23469	15.7097	7.68921	0.180686	2.30877	5.45071	3.80445	1.85706		100		61.7647	1.23469	15.7097	7.68921	0.180686	2.30877	5.45071	3.80445	1.85706		100					71	157.2	42.9	210.6	8.5		259.8	20.1	45.4	5.6	24.3	5.6	1.6	6		7.6
SAVP	15	T	Santorini		Upper Scoria 2	60.3334	1.27536	15.1336	8.72666	0.200844	3.0729	6.02531	3.5951	1.63687		100		60.3334	1.27536	15.1336	8.72666	0.200844	3.0729	6.02531	3.5951	1.63687		100					65.8	204	35.6	166.6	6.2		220.9	15.7	34.4	4.4	18.1	5	1.3	5.3		6.1
SAVP	15	T	Santorini		Upper Scoria 2	63.2774	1.35637	15.3421	7.57561	0.130614	1.93911	4.24997	3.73756	2.39124		100		63.2774	1.35637	15.3421	7.57561	0.130614	1.93911	4.24997	3.73756	2.39124		100					84.9	170.5	40.2	207.1	8.3		269.7	20.5	44.5	5.4	23.6	5.8	1.3	5.5		7.2
SAVP	15	T	Santorini		Upper Scoria 2	62.1372	1.16501	15.7176	7.83368	0.19082	1.96847	4.98142	3.73607	2.26976		100		62.1372	1.16501	15.7176	7.83368	0.19082	1.96847	4.98142	3.73607	2.26976		100					85.1	148.9	39.7	207.2	7.9		250	18.4	41.4	5.2	21.5	6.4	1.4	6.7		7.1
SAVP	15	T	Santorini		Upper Scoria 2	61.8134	1.23507	15.6843	7.86224	0.200824	1.92791	5.121	4.14701	2.00824		100		61.8134	1.23507	15.6843	7.86224	0.200824	1.92791	5.121	4.14701	2.00824		100					79.5	160.3	39	206.4	7.9		253.9	18.8	41.8	5.1	21	5.1	1.4	6.1		7
SAVP	15	T	Santorini		Upper Scoria 2	61.5686	1.26532	15.3746	8.17433	0.23097	2.21932	5.11147	4.10725	1.94818		100		61.5686	1.26532	15.3746	8.17433	0.23097	2.21932	5.11147	4.10725	1.94818		100
SAVP	15	T	Santorini		Upper Scoria 2	61.7579	1.30588	15.2486	7.98594	0.120542	2.36062	5.00251	4.11853	2.09945		100		61.7579	1.30588	15.2486	7.98594	0.120542	2.36062	5.00251	4.11853	2.09945		100
SAVP	15	T	Santorini		Upper Scoria 2	66.1579	0.78329	15.5453	5.12151	0.23097	1.12472	3.52481	4.91062	2.60092		100		66.1579	0.78329	15.5453	5.12151	0.23097	1.12472	3.52481	4.91062	2.60092		100
SAVP	15	T	Santorini		Upper Scoria 2	67.0717	0.763205	15.4148	5.02109	0.160675	0.964048	3.10303	4.69973	2.80176		100		67.0717	0.763205	15.4148	5.02109	0.160675	0.964048	3.10303	4.69973	2.80176		100
SAVP	15	T	Santorini		Upper Scoria 2	64.9428	1.03435	15.8766	5.54329	0.140591	1.49628	3.96667	4.62945	2.36995		100		64.9428	1.03435	15.8766	5.54329	0.140591	1.49628	3.96667	4.62945	2.36995		100
SAVP	15	T	Santorini		Upper Scoria 2	67.1351	0.722746	15.2881	5.03915	0.130496	0.903433	3.08171	4.79823	2.90102		100		67.1351	0.722746	15.2881	5.03915	0.130496	0.903433	3.08171	4.79823	2.90102		100
SAVP	15	T	Santorini		Upper Scoria 2	63.8163	1.11535	16.0772	5.87821	0.200965	1.69815	4.33079	4.59204	2.29099		100		63.8163	1.11535	16.0772	5.87821	0.200965	1.69815	4.33079	4.59204	2.29099		100
SAVP	15	T	Santorini		Upper Scoria 2	67.2857	0.70267	15.4186	5.04919	0.180687	0.873318	2.95121	4.68782	2.85083		100		67.2857	0.70267	15.4186	5.04919	0.180687	0.873318	2.95121	4.68782	2.85083		100					69.6	116.7	25.9	136	6.3		203.4	13.8	30.8	3.5	14.5	4.1	1.1	5		3.8
SAVP	15	T	Santorini		Upper Scoria 2	67.3192	0.702811	15.4217	4.75904	0.120482	0.873494	3.06224	4.88955	2.85141		100		67.3192	0.702811	15.4217	4.75904	0.120482	0.873494	3.06224	4.88955	2.85141		100					82.4	158.2	38.6	208.9	9.6		296.2	20.8	45.7	5.3	23.3	0	1.4	0		6.8
SAVP	15	T	Santorini		Upper Scoria 2	66.6934	0.782975	15.4487	5.02911	0.11042	1.05401	3.22225	4.99899	2.66011		100		66.6934	0.782975	15.4487	5.02911	0.11042	1.05401	3.22225	4.99899	2.66011		100					98.2	149.6	43.9	249.7	10.8		350.2	24.5	50.9	6.2	25.8	6.1	1.4	6.6		7.7
SAVP	15	T	Santorini		Upper Scoria 2	64.5576	0.954103	15.7276	6.05605	0.210907	1.44622	4.08758	4.70021	2.25971		100		64.5576	0.954103	15.7276	6.05605	0.210907	1.44622	4.08758	4.70021	2.25971		100					94.5	143.7	41.1	243.8	11		354.6	22.8	50.4	6.2	23.7	6.9	1.5	6.4		7.3
SAVP	15	T	Santorini		Upper Scoria 2	61.8502	1.19658	16.0483	7.13926	0.140774	2.10156	5.09803	4.38411	2.04123		100		61.8502	1.19658	16.0483	7.13926	0.140774	2.10156	5.09803	4.38411	2.04123		100					79.1	171.7	40.5	209.8	9.1		298.8	21.8	46.7	5.8	23.8	5.8	1.5	6.2		7.2
SAVP	15	T	Santorini		Upper Scoria 2	64.7148	0.944155	15.8095	5.72519	0.140619	1.44637	4.03776	4.75091	2.43069		100		64.7148	0.944155	15.8095	5.72519	0.140619	1.44637	4.03776	4.75091	2.43069		100					104.6	108.1	41.1	244.5	10.9		343.2	23.2	50.2	5.9	23.9	6.1	1.2	6.9		7.1
SAVP	15	T	Santorini		Upper Scoria 2	67.2054	0.712709	15.3483	4.91869	0.170649	0.893395	3.12187	4.89861	2.73038		100		67.2054	0.712709	15.3483	4.91869	0.170649	0.893395	3.12187	4.89861	2.73038		100					106.2	122.3	44	246.2	11.1		365.2	24.6	57.4	5.9	25	7.7	1.4	7		7
SAVP	15	T	Santorini		Upper Scoria 2	67.393	0.672825	15.475	4.80016	0.100422	0.893753	3.01265	4.89054	2.7616		100		67.393	0.672825	15.475	4.80016	0.100422	0.893753	3.01265	4.89054	2.7616		100					92.6	151.6	40.3	212.8	9.4		311.5	21.8	45.3	5.5	24	6.7	1.4	0		6.7
SAVP	15	T	Santorini		Upper Scoria 2	65.8265	0.813416	15.6055	5.40269	0.210886	1.15486	3.5248	4.96083	2.5005		100		65.8265	0.813416	15.6055	5.40269	0.210886	1.15486	3.5248	4.96083	2.5005		100					116.8	117.1	45.7	274.3	12.1		390.1	25.2	54.4	6.5	27.2	7.2	1.4	7.4		7.9
SAVP	15	T	Santorini		Upper Scoria 2	67.416	0.722529	15.444	4.75665	0.180632	0.873056	3.02057	4.82689	2.75966		100		67.416	0.722529	15.444	4.75665	0.180632	0.873056	3.02057	4.82689	2.75966		100					101.6	119.7	40.2	237	10.4		329.6	22.6	48.2	5.3	24.9	0	0	0		6.4
SAVP	15	T	Santorini		Upper Scoria 2	62.6722	1.20639	16.1355	6.20288	0.180959	2.03077	4.82558	4.65467	2.09108		100		62.6722	1.20639	16.1355	6.20288	0.180959	2.03077	4.82558	4.65467	2.09108		100					109.9	115.2	41.8	255.9	10.4		362	24.1	52.4	6.1	27.3	6.6	1.2	6.8		7.1
SAVP	15	T	Santorini		Upper Scoria 2	67.3025	0.773014	15.38	4.8991	0.130509	1.00391	3.02179	4.72844	2.76077		100		67.3025	0.773014	15.38	4.8991	0.130509	1.00391	3.02179	4.72844	2.76077		100					75.2	235.6	36.5	189.9	8.2		286.6	19.8	41.4	4.9	22.6	5.3	1.5	6.7		6.3
SAVP	15	T	Santorini		Upper Scoria 2	67.2055	0.77317	15.112	5.0005	0.271112	0.823376	2.94206	4.98042	2.89186		100		67.2055	0.77317	15.112	5.0005	0.271112	0.823376	2.94206	4.98042	2.89186		100					103.9	114	40.3	236.6	10.2		327.8	21	48.4	5.9	24.3	5.6	1.2	6.6		7.2
SAVP	15	T	Santorini		Upper Scoria 2	65.8968	0.913838	15.8164	5.10142	0.14059	1.26531	3.57501	4.73991	2.55071		100		65.8968	0.913838	15.8164	5.10142	0.14059	1.26531	3.57501	4.73991	2.55071		100					109	117.2	47.2	280.8	11.8		379.2	26.5	56.4	6.6	28.6	6.7	1.3	7.1		8.2
SAVP	17	M	Santorini		Upper Scoria 2	65.82	0.6397	15.18	4.4	0.0525	0.731	2.72	4.92	2.88	0.0952	97.4385		67.5503	0.656517	15.5791	4.51567	0.0538801	0.750217	2.7915	5.04934	2.95571	0.0977027	99.9999			21.68	12.22	114.32	131.02	44.69	282.75	10.85	4.09	339.08	25.11	55.23	6.61	25.19	6.53	1.518	6.76	1.171	7.4	1.771
SAVP	17	M	Santorini		Upper Scoria 2	65.32	0.6416	14.91	4.4	0.0534	0.6982	2.64	4.97	2.9	0.1479	96.6811		67.5623	0.663625	15.4218	4.55104	0.0552331	0.722168	2.73063	5.14061	2.99955	0.152977	100			26.1	13.51	124.04	122.18	52.91	323.97	11.45	4.3	367.15	27.92	59.54	7.21	29.56	7.47	1.7	7.93	1.203	8.11	1.892
SAVP	17	M	Santorini		Upper Scoria 2	65.7	0.6164	14.9	4.25	0.0592	0.7279	2.7	4.9	2.91	0.0935	96.857		67.832	0.636402	15.3835	4.38791	0.061121	0.75152	2.78761	5.059	3.00443	0.0965341	100			27.76	15.06	131.56	122.78	54.78	324.89	11.9	4.56	380.9	29.32	61.68	7.39	28.97	7.12	1.37	8.53	1.409	8.4	1.84
SAVP	17	M	Santorini		Upper Scoria 2	65.24	0.5963	14.87	4.11	0.1624	0.7316	2.68	4.81	2.86	0.1327	96.193		67.822	0.6199	15.4585	4.27266	0.168827	0.760554	2.78607	5.00036	2.97319	0.137952	100			30.63	14.7	147.24	113.28	54.34	334.15	12.92	4.85	404.65	29.46	64.77	7.62	32.05	7.97	1.628	7.59	1.451	9.37	1.95
SAVP	17	M	Santorini		Upper Scoria 2	65.43	0.6169	15.08	4.64	0.0229	0.7425	2.71	4.8	2.93	0.1309	97.1033		67.3819	0.635303	15.5299	4.77842	0.0235831	0.76465	2.79084	4.94319	3.01741	0.134805	99.9999			31.46	14.56	135.3	118.88	55.36	327.78	12.37	4.57	383.16	28.61	60.66	7.54	29.47	7.62	1.618	8.17	1.416	9.37	2.09
SAVP	17	M	Santorini		Upper Scoria 2	65.38	0.6187	15.12	3.97	0.1721	0.7348	2.77	4.86	2.93	0.1669	96.7225		67.5954	0.639665	15.6324	4.10453	0.177932	0.759699	2.86386	5.02468	3.02928	0.172556	100
SAVP	17	M	Santorini		Upper Scoria 2	65.04	0.6391	14.81	4.41	0.1328	0.7755	2.67	4.77	2.84	0.1382	96.2256		67.5912	0.664168	15.3909	4.58298	0.138009	0.805919	2.77473	4.9571	2.9514	0.143621	100
SAVP	17	M	Santorini		Upper Scoria 2	65.31	0.6527	14.59	4.6	0.1142	0.7608	2.63	4.83	2.94	0.143	96.5708		67.6291	0.675877	15.1081	4.76334	0.118255	0.787816	2.72339	5.00151	3.0444	0.148078	99.9999
SAVP	17	M	Santorini		Upper Scoria 2	65.09	0.6187	14.84	4.21	0.0947	0.7971	2.75	4.75	2.67	0.134	95.9546		67.8342	0.644784	15.4656	4.38749	0.0986925	0.830705	2.86594	4.95026	2.78257	0.139649	99.9999
SAVP	17	M	Santorini		Upper Scoria 2	66.2	0.6513	14.64	4.51	0.1874	0.7587	2.69	4.98	2.81	0.1272	97.5546		67.8594	0.667626	15.007	4.62305	0.192098	0.777718	2.75743	5.10483	2.88044	0.130389	100
SAVP	17	M	Santorini		Upper Scoria 2	65.5	0.6353	14.72	4.4	0.0982	0.7688	2.76	4.81	3.02	0.1551	96.8674		67.6182	0.655845	15.196	4.54229	0.101376	0.793662	2.84926	4.96555	3.11766	0.160116	100
SAVP	17	M	Santorini		Upper Scoria 2	66.45	0.6224	14.72	4.37	0.1919	0.7221	2.57	4.81	2.9	0.1238	97.4803		68.1676	0.638488	15.1005	4.48296	0.19686	0.740765	2.63643	4.93433	2.97496	0.127	99.9999
SAVP	17	M	Santorini		Upper Scoria 2	66.63	0.6254	14.91	4.22	0.1585	0.7731	2.72	5.06	2.91	0.1434	98.1505		67.8855	0.637185	15.191	4.29952	0.161487	0.787668	2.77125	5.15535	2.96483	0.146102	99.9999
SAVP	17	M	Santorini		Upper Scoria 2	65.1	0.6254	14.91	4.33	0.1009	0.6798	2.76	5.19	2.81	0.1412	96.6474		67.3583	0.647094	15.4272	4.4802	0.1044	0.703382	2.85574	5.37004	2.90748	0.146098	99.9999
SAVP	17	M	Santorini		Upper Scoria 2	65.23	0.6302	14.46	4.11	0.2037	0.7261	2.51	4.7	2.82	0.0952	95.4853		68.3142	0.659997	15.1437	4.30433	0.213331	0.760431	2.62868	4.92222	2.95333	0.0997012	99.9999
SAVP	17	M	Santorini		Upper Scoria 2	64.96	0.6181	14.72	4.38	0.1201	0.6604	2.72	4.6	2.79	0.1562	95.7249		67.8611	0.645705	15.3774	4.57561	0.125464	0.689894	2.84148	4.80544	2.9146	0.163176	99.9999
SAVP	17	M	Santorini		Upper Scoria 2	66.03	0.6241	14.87	4.33	0.1049	0.6981	2.64	4.92	2.91	0.1267	97.2539		67.8944	0.641722	15.2899	4.45226	0.107862	0.717812	2.71454	5.05892	2.99217	0.130278	99.9999
SAVP	17	M	Santorini		Upper Scoria 2	58.59	1.2667	15.99	7.79	0.1712	2.58	6.03	3.5	1.83	0.2045	97.9525		59.8147	1.29318	16.3242	7.95283	0.174779	2.63393	6.15605	3.57316	1.86825	0.208775	99.9999			10.94	23.09	75.65	177.96	35.85	176	7.52	2.52	236.89	17.37	39.92	4.58	19.94	5.37	1.38	5.44	0.862	6.43	1.263
SAVP	17	M	Santorini		Upper Scoria 2	58.85	1.2124	16.23	7.74	0.2278	2.51	5.96	3.69	1.8	0.1788	98.3991		59.8075	1.23213	16.4941	7.86593	0.231506	2.55084	6.05697	3.75003	1.82929	0.181709	99.9999			2.37	23.66	71.47	175.19	36.28	176.32	7.65	2.44	239.21	17.78	40.1	4.92	20.57	5.63	1.344	5.7	0.949	6.44	1.29
SAVP	17	M	Santorini		Upper Scoria 2	59.75	1.2841	16.09	7.36	0.186	2.5	5.66	3.83	1.89	0.1895	98.7397		60.5126	1.30049	16.2954	7.45394	0.188374	2.53191	5.73224	3.87889	1.91412	0.191919	99.9999			4.7	23.73	75.55	173.99	35.79	176.75	7.71	2.55	238.07	17.48	39.86	4.71	20.51	5.25	1.575	5.45	0.944	6.18	1.367
SAVP	17	M	Santorini		Upper Scoria 2	60.25	1.238	16	7.02	0.167	2.25	5.59	3.99	1.96	0.2178	98.6829		61.0541	1.25452	16.2135	7.11369	0.169229	2.28003	5.66461	4.04325	1.98616	0.220707	99.9999			0.83	23.44	79.06	175.05	37.29	182.39	8.17	2.71	251.74	18.28	41.22	5.04	20.66	5.31	1.527	5.59	1.033	6.3	1.318
SAVP	17	M	Santorini		Upper Scoria 2	59.5	1.2859	16.24	7.66	0.1968	2.51	5.78	3.24	1.83	0.2616	98.5043		60.4035	1.30543	16.4866	7.77631	0.199788	2.54811	5.86776	3.2892	1.85779	0.265572	100			15.85	23.48	78.85	181.16	37.67	184.27	7.38	2.58	260.04	18.38	40.27	5.15	20.18	5.29	1.442	4.98	0.986	6.2	1.469
SAVP	17	M	Santorini		Upper Scoria 2	58.56	1.2544	16.07	8.64	0.2456	2.72	5.98	3.93	1.79	0.1851	99.3752		58.9282	1.26229	16.171	8.69432	0.247144	2.7371	6.0176	3.95471	1.80125	0.186264	99.9999
SAVP	17	M	Santorini		Upper Scoria 2	58.9	1.2867	16.03	8.48	0.0732	2.46	5.83	3.7	1.75	0.1741	98.6841		59.6854	1.30386	16.2438	8.59308	0.0741761	2.4928	5.90774	3.74934	1.77334	0.176422	99.9999
SAVP	17	M	Santorini		Upper Scoria 2	58.59	1.2891	16.34	8.33	0.1225	2.71	6.29	3.38	1.75	0.2007	99.0024		59.1804	1.30209	16.5047	8.41394	0.123734	2.73731	6.35338	3.41406	1.76763	0.202722	99.9999
SAVP	17	M	Santorini		Upper Scoria 2	58.64	1.2668	16.09	7.84	0.1211	2.65	6.12	3.39	1.81	0.1858	98.1138		59.7673	1.29115	16.3993	7.99072	0.123428	2.70095	6.23765	3.45517	1.8448	0.189372	99.9999
SAVP	17	M	Santorini		Upper Scoria 2	59.91	1.3133	16.4	7.58	0.1918	2.6	5.88	3.93	1.92	0.2052	99.9304		59.9517	1.31421	16.4114	7.58528	0.191934	2.60181	5.8841	3.93274	1.92134	0.205343	99.9999
SAVP	17	M	Santorini		Upper Scoria 2	58.48	1.259	16.11	8.67	0.1802	2.69	6.36	3.88	1.73	0.2195	99.5788		58.7274	1.26433	16.1781	8.70667	0.180962	2.70138	6.3869	3.89641	1.73732	0.220428	99.9999
SAVP	17	M	Santorini		Upper Scoria 2	59.08	1.2313	15.97	8.02	0.22	2.67	5.93	3.48	1.81	0.1828	98.5942		59.9224	1.24886	16.1977	8.13435	0.223137	2.70807	6.01455	3.52962	1.83581	0.185406	99.9999
SAVP	17	M	Santorini		Upper Scoria 2	58.95	1.2528	15.92	7.87	0.0869	2.61	5.59	3.53	1.83	0.2158	97.8555		60.2419	1.28026	16.2689	8.04247	0.0888044	2.6672	5.7125	3.60736	1.8701	0.220529	100
SAVP	17	M	Santorini		Upper Scoria 2	58.51	1.3327	16.05	8.1	0.2098	2.67	5.66	4.13	2.26	0.1837	99.1063		59.0376	1.34472	16.1947	8.17304	0.211692	2.69408	5.71104	4.16724	2.28038	0.185357	99.9999
SAVP	17	M	Santorini		Upper Scoria 2	58.87	1.2643	16.05	7.66	0.2233	2.21	4.93	3.92	2.36	0.2004	97.688		60.2633	1.29422	16.4299	7.84129	0.228585	2.2623	5.04668	4.01278	2.41585	0.205143	100
SAVP	17	M	Santorini		Upper Scoria 2	58.86	1.228	16	7.08	0.2399	2.3	5.39	4.3	2.49	0.1779	98.0659		60.0209	1.25222	16.3156	7.21963	0.244631	2.34536	5.4963	4.38481	2.53911	0.181409	99.9999
SAVP	17	M	Santorini		Upper Scoria 2	59.33	1.3569	15.47	8.59	0.2911	2.42	5.73	4.21	1.61	0.1341	99.1422		59.8433	1.36864	15.6038	8.66432	0.293619	2.44094	5.77958	4.24643	1.62393	0.13526	99.9999
SAVP	17	M	Santorini		Upper Scoria 2	58.65	1.2651	16.18	7.85	0.2399	2.57	6.07	4.07	1.62	0.2299	98.7449		59.3955	1.28118	16.3857	7.94978	0.242949	2.60267	6.14715	4.12173	1.64059	0.232822	100
SAVP	17	M	Santorini		Upper Scoria 2	59.61	1.4216	15.26	8.99	0.1761	1.98	5.15	4.59	1.45	0.183	98.8108		60.3274	1.43871	15.4437	9.0982	0.178219	2.00383	5.21198	4.64524	1.46745	0.185202	99.9999
SAVP	17	M	Santorini		Upper Scoria 2	59.34	1.2491	16	7.7	0.1544	2.57	6.31	4.32	1.26	0.1887	99.0923		59.8836	1.26054	16.1466	7.77053	0.155814	2.59354	6.3678	4.35957	1.27154	0.190429	99.9999
SAVP	17	M	Santorini		Upper Scoria 2	59.6	1.2265	16.05	7.81	0.1568	2.04	5.77	3.3	1.88	0.1855	98.0189		60.8046	1.25129	16.3744	7.96785	0.159969	2.08123	5.88662	3.3667	1.918	0.189249	99.9999
SAVP	17	M	Santorini		Upper Scoria 2	58.92	1.181	15.82	7.89	0.2029	2.5	5.91	3.68	1.99	0.2029	98.2969		59.9409	1.20146	16.0941	8.0267	0.206415	2.54332	6.0124	3.74376	2.02448	0.206415	99.9999
SAVP	17	M	Santorini		Upper Scoria 2	58.88	1.264	15.44	8.87	0.2086	2.67	5.64	2.64	2.31	0.1519	98.0746		60.0359	1.28881	15.7431	9.04414	0.212695	2.72242	5.75072	2.69183	2.35535	0.154882	99.9999
SAVP	17	M	Santorini		Upper Scoria 2	58.82	1.2719	15.93	8.32	0.2028	2.73	6.07	3.49	1.86	0.2015	98.8962		59.4765	1.2861	16.1078	8.41286	0.205063	2.76047	6.13775	3.52895	1.88076	0.203749	100
SAVP	17	M	Santorini		Upper Scoria 2	58.7	1.302	15.81	8.01	0.1514	2.71	6.17	4.11	1.36	0.1806	98.5041		59.5914	1.32177	16.0501	8.13164	0.153699	2.75115	6.2637	4.17242	1.38065	0.183343	99.9999
SAVP	17	M	Santorini		Upper Scoria 2	59.8	1.2959	15.74	7.86	0.1295	2.35	5.89	4.28	1.49	0.1803	99.0157		60.3945	1.30878	15.8965	7.93814	0.130787	2.37336	5.94855	4.32255	1.50481	0.182092	100
SAVP	17	M	Santorini		Megalo Vouno	54.33	0.9557	16.06	9.32	0.1795	5.76	9.11	2.77	0.9919	0.1169	99.5941		54.5514	0.959595	16.1255	9.35798	0.180232	5.78348	9.14713	2.78129	0.995943	0.117376	99.9999			4.95	34.58	12.51	410.24	15.42	62.15	1.93	0.301	184.62	6.08	14.67	1.965	8.64	2.59	0.756	2.87	0.434	2.79	0.546
SAVP	17	M	Santorini		Megalo Vouno	53.92	0.8835	15.98	8.8	0.1247	5.61	9.2	2.83	1.0166	0.1143	98.4791		54.7527	0.897145	16.2268	8.93591	0.126626	5.69664	9.34208	2.87371	1.0323	0.116065	100			5.39	36.92	14.23	403.05	17.3	70.34	2.3	0.368	213.12	7.15	17.06	2.26	9.96	2.67	0.895	3.04	0.476	2.91	0.65
SAVP	17	M	Santorini		Megalo Vouno	54.39	0.9818	16.2	8.86	0.2645	5.22	9.04	2.78	0.9865	0.0742	98.7971		55.0522	0.993754	16.3972	8.96787	0.26772	5.28356	9.15007	2.81385	0.998511	0.0751034	99.9999			8.67	36.22	14.93	418.59	17.9	71.53	2.19	0.4	218.02	7.6	17.3	2.18	10.9	2.82	0.825	3.08	0.393	3.06	0.687
SAVP	17	M	Santorini		Megalo Vouno	54.94	0.9421	16.11	9.83	0.1372	5.41	8.78	2.72	1.0052	0.0602	99.9348		54.9758	0.942715	16.1205	9.83641	0.13729	5.41353	8.78573	2.72177	1.00586	0.0602393	99.9999			5.8	36.26	14.74	414.89	17.36	70.75	2.24	0.375	208.49	7.4	16.93	2.28	10.34	3.02	0.955	2.79	0.447	3.19	0.68
SAVP	17	M	Santorini		Megalo Vouno	54.41	0.9568	15.8	10.04	0.2104	5.2	9.17	2.53	0.8991	0.1125	99.3289		54.7776	0.963264	15.9068	10.1078	0.211822	5.23513	9.23196	2.54709	0.905175	0.11326	99.9999			2.67	30.54	12.16	448.26	14.32	60.17	2.02	0.253	182.89	6.5	14.55	1.899	8.86	2.46	0.863	2.7	0.461	2.8	0.568
SAVP	17	M	Santorini		Megalo Vouno	54.64	0.9494	16.03	8.58	0.1751	5.42	9.05	3.1	1.0434	0.0975	99.0855		55.1443	0.958162	16.1779	8.65919	0.176716	5.47002	9.13353	3.12861	1.05303	0.0983999	99.9999
SAVP	17	M	Santorini		Megalo Vouno	53.95	0.9248	15.79	8.74	0.1124	5.84	9.08	2.82	0.9565	0.1095	98.3232		54.8701	0.940572	16.0593	8.88905	0.114317	5.9396	9.23485	2.86809	0.972812	0.111367	100
SAVP	17	M	Santorini		Megalo Vouno	52.69	0.8414	16.28	8.29	0.1329	5.06	9.55	3.21	0.8742	0.0791	97.0077		54.3153	0.867354	16.7822	8.54571	0.136999	5.21608	9.84458	3.30902	0.901166	0.0815399	99.9999
SAVP	17	M	Santorini		Megalo Vouno	54.39	0.9162	15.73	9	0.1549	5.31	9.08	2.52	1.0028	0.0887	98.1926		55.3911	0.933064	16.0195	9.16566	0.157751	5.40774	9.24713	2.56638	1.02126	0.0903327	100
SAVP	17	M	Santorini		Megalo Vouno	54.86	0.8514	16.32	8.63	0.1932	5.08	9.26	2.84	0.9532	0.0735	99.0614		55.3798	0.859467	16.4746	8.71177	0.195031	5.12813	9.34774	2.86691	0.962232	0.0741964	99.9999
SAVP	17	M	Santorini		Megalo Vouno	55.29	0.8552	16.91	8.31	0.1561	4.89	9.24	3.18	0.7821	0.0762	99.6897		55.4621	0.857862	16.9626	8.33587	0.156586	4.90522	9.26876	3.1899	0.784534	0.0764372	99.9999
SAVP	17	M	Santorini		Megalo Vouno	54.05	0.8971	15.38	9.33	0.2084	5.57	8.83	2.76	1.0957	0.1295	98.2508		55.0123	0.913071	15.6538	9.49611	0.21211	5.66917	8.9872	2.80914	1.11521	0.131806	99.9999
SAVP	1		Santorini	X-1	Upper Scoria 1	58.63	0.96	17.72	6.94	0.17	2.88	6.67	3.65	1.53	0	99.15		59.1326	0.96823	17.8719	6.9995	0.171457	2.90469	6.72718	3.68129	1.54312	0	100
SAVP	3	M	Santorini	X-1	Upper Scoria 1	61.39	1.12	13.74	8.69	0.2	3.44	5.72	4.17	1.54		100.01		61.3839	1.11989	13.7386	8.68913	0.19998	3.43966	5.71943	4.16958	1.53985		100
SAVP	3	M	Santorini	X-1	Upper Scoria 1	61.48	1.12	15.49	7.73	0.17	2.39	5.55	4.44	1.64		100.01		61.4739	1.11989	15.4885	7.72923	0.169983	2.38976	5.54945	4.43956	1.63984		100
SAVP	3	M	Santorini	X-1	Upper Scoria 1	60.34	0.93	17.48	6.35	0.14	2.28	6.33	4.88	1.26		99.99		60.346	0.930093	17.4817	6.35064	0.140014	2.28023	6.33063	4.88049	1.26013		100
SAVP	3	M	Santorini	X-1	Upper Scoria 1	59.55	0.97	18	6.35	0.17	2.92	6.97	3.7	1.55		100.18		59.443	0.968257	17.9677	6.33859	0.169695	2.91475	6.95748	3.69335	1.54722		100
SAVP	4	T	Santorini	X-1	Upper Scoria 1	63.2	1.01	15.5	7.2	0.18	1.58	4.48	4.65	1.96	0.26	100.02		63.1874	1.0098	15.4969	7.19856	0.179964	1.57968	4.4791	4.64907	1.95961	0.259948	100					70	177	57	244	10		370	28	56
SAVP	4	T	Santorini	X-1	Upper Scoria 1	58.1	1.27	16	8.81	0.19	2.9	6.62	4.76	1.25	0.19	100.09		58.0478	1.26886	15.9856	8.80208	0.189829	2.89739	6.61405	4.75572	1.24888	0.189829	100					49	192	40	167	8		262	17	40
SAVP	6	T	Santorini	X-1	Upper Scoria 1	58.1	1.27	16	8.81	0.19	2.9	6.62	4.76	1.25	0.19	100.09		58.0478	1.26886	15.9856	8.80208	0.189829	2.89739	6.61405	4.75572	1.24888	0.189829	100					49	192	40	167	8		262	17	40
SAVP	6	T	Santorini	X-1	Upper Scoria 1	58.3	1.32	16	8.96	0.2	2.9	6.55	4.2	1.37	0.2	100		58.3	1.32	16	8.96	0.2	2.9	6.55	4.2	1.37	0.2	100					48	203	44	176	7		217	16	48
SAVP	6	T	Santorini	X-1	Upper Scoria 1	58.4	1.33	16	8.99	0.22	2.92	6.56	4.21	1.38	0.19	100.2		58.2834	1.32735	15.9681	8.97206	0.219561	2.91417	6.54691	4.2016	1.37725	0.189621	100					51	205	44	179	7		229	13	45
SAVP	6	T	Santorini	X-1	Upper Scoria 1	58.6	1.31	15.9	7.95	0.19	2.81	6.46	4.23	1.42	0.21	99.08		59.1441	1.32216	16.0476	8.02382	0.191764	2.83609	6.51998	4.26928	1.43319	0.21195	100					47	194	44	182	7		285	7	53
SAVP	6	T	Santorini	X-1	Upper Scoria 1	58.6	1.33	15.9	8	0.18	2.85	6.43	4.22	1.39	0.21	99.11		59.1262	1.34194	16.0428	8.07184	0.181616	2.87559	6.48774	4.2579	1.40248	0.211886	100					45	195	45	181	8		289	21	52
SAVP	6	T	Santorini	X-1	Upper Scoria 1	58.6	1.27	16.1	8.69	0.19	2.91	6.29	4.23	1.45	0.2	99.93		58.641	1.27089	16.1113	8.69609	0.190133	2.91204	6.29441	4.23296	1.45102	0.20014	100					55	205	45	189	9		239	11	57
SAVP	6	T	Santorini	X-1	Upper Scoria 1	58.7	1.31	15.9	8.84	0.18	2.77	6.39	4.42	1.37	0.19	100.07		58.6589	1.30908	15.8889	8.83382	0.179874	2.76806	6.38553	4.41691	1.36904	0.189867	100					52	197	42	174	6		224	15	54
SAVP	6	T	Santorini	X-1	Upper Scoria 1	58.7	1.34	15.7	8.95	0.19	2.82	6.45	4.08	1.52	0.19	99.94		58.7352	1.3408	15.7094	8.95537	0.190114	2.82169	6.45387	4.08245	1.52091	0.190114	100					52	194	43	179	8		300	24	25
SAVP	6	T	Santorini	X-1	Upper Scoria 1	58.8	1.29	15.8	8.78	0.2	2.92	6.34	4.28	1.33	0.24	99.98		58.8118	1.29026	15.8032	8.78176	0.20004	2.92058	6.34127	4.28086	1.33027	0.240048	100					55	202	51	189	7		261	11	44
SAVP	6	T	Santorini	X-1	Upper Scoria 1	58.9	1.31	16	8.62	0.18	2.86	6.35	4.17	1.48	0.18	100.05		58.8706	1.30935	15.992	8.61569	0.17991	2.85857	6.34683	4.16792	1.47926	0.17991	100					52	204	41	179	7		257	12	40
SAVP	6	T	Santorini	X-1	Upper Scoria 1	59	1.31	15.8	8.81	0.18	2.73	6.31	4.24	1.44	0.2	100.02		58.9882	1.30974	15.7968	8.80824	0.179964	2.72945	6.30874	4.23915	1.43971	0.19996	100					51	199	45	178	6		255	16	55
SAVP	6	T	Santorini	X-1	Upper Scoria 1	59	1.27	16	8.77	0.19	2.77	6.28	4.01	1.45	0.2	99.94		59.0354	1.27076	16.0096	8.77527	0.190114	2.77166	6.28377	4.01241	1.45087	0.20012	100					53	202	44	187	8		261	19	44
SAVP	6	T	Santorini	X-1	Upper Scoria 1	59.7	1.23	15.7	8.65	0.18	2.6	6.09	4.06	1.52	0.21	99.94		59.7358	1.23074	15.7094	8.65519	0.180108	2.60156	6.09366	4.06244	1.52091	0.210126	100					55	193	44	191	8		324	13	56
SAVP	6	T	Santorini	X-1	Upper Scoria 1	63.2	1.01	15.5	7.2	0.18	1.58	4.48	4.65	1.96	0.26	100.02		63.1874	1.0098	15.4969	7.19856	0.179964	1.57968	4.4791	4.64907	1.95961	0.259948	100					70	177	57	244	10		370	28	56
SAVP	15	T	Santorini	X-1	Upper Scoria 1	60.0261	1.29466	16.0378	8.21959	0.170614	2.61943	6.34284	3.93417	1.35488		100		60.0261	1.29466	16.0378	8.21959	0.170614	2.61943	6.34284	3.93417	1.35488		100					54.6	173.4	38.6	173.2	6.8		245.4	16.7	36.5	4.9	20	5.6	1.3	6.1		6.3
SAVP	15	T	Santorini	X-1	Upper Scoria 1	59.9016	1.34565	15.716	9.00783	0.190801	2.66118	6.16589	3.51476	1.49628		100		59.9016	1.34565	15.716	9.00783	0.190801	2.66118	6.16589	3.51476	1.49628		100
SAVP	15	T	Santorini	X-1	Upper Scoria 1	59.8434	1.40548	15.8719	8.46301	0.24094	2.53991	6.15401	4.16625	1.31513		100		59.8434	1.40548	15.8719	8.46301	0.24094	2.53991	6.15401	4.16625	1.31513		100
SAVP	15	T	Santorini	X-1	Upper Scoria 1	59.6426	1.4356	15.1691	9.73798	0.150587	2.48971	5.83275	4.10601	1.4356		100		59.6426	1.4356	15.1691	9.73798	0.150587	2.48971	5.83275	4.10601	1.4356		100
SAVP	15	T	Santorini	X-1	Upper Scoria 1	59.2752	1.25477	17.105	8.05059	0.210801	2.14817	6.59506	4.11564	1.24473		100		59.2752	1.25477	17.105	8.05059	0.210801	2.14817	6.59506	4.11564	1.24473		100
SAVP	15	T	Santorini	X-1	Upper Scoria 1	59.8996	1.48594	15.4619	9.43774	0.200803	2.59036	6.12449	3.39357	1.40562		100		59.8996	1.48594	15.4619	9.43774	0.200803	2.59036	6.12449	3.39357	1.40562		100
SAVP	15	T	Santorini	X-1	Upper Scoria 1	60.5321	1.35543	15.6124	8.90563	0.170683	2.5	5.95382	3.35342	1.61647		100		60.5321	1.35543	15.6124	8.90563	0.170683	2.5	5.95382	3.35342	1.61647		100
SAVP	15	T	Santorini	X-1	Upper Scoria 1	60.8351	1.27471	15.0457	8.87283	0.200743	2.38884	5.4602	4.37619	1.54572		100		60.8351	1.27471	15.0457	8.87283	0.200743	2.38884	5.4602	4.37619	1.54572		100
SAVP	15	T	Santorini	X-1	Upper Scoria 1	60.7931	1.34539	15.2611	9.16667	0.190763	2.46988	5.94378	3.27309	1.55622		100		60.7931	1.34539	15.2611	9.16667	0.190763	2.46988	5.94378	3.27309	1.55622		100
SAVP	15	T	Santorini	X-1	Upper Scoria 1	60.4758	1.27497	15.9121	8.3325	0.160627	2.46964	5.85283	3.99559	1.52595		100		60.4758	1.27497	15.9121	8.3325	0.160627	2.46964	5.85283	3.99559	1.52595		100
SAVP	15	T	Santorini	X-1	Upper Scoria 1	60.7989	1.25452	16.2987	8.10919	0.210759	2.29827	6.0016	3.3621	1.666		100		60.7989	1.25452	16.2987	8.10919	0.210759	2.29827	6.0016	3.3621	1.666		100					50.3	211.6	37.1	157.4	6.2		233.8	16	34.4	3.8	20	5.3	1.5	6.4		6.6
SAVP	15	T	Santorini	X-1	Upper Scoria 1	60.1406	1.38554	15.6726	8.98595	0.240964	2.59036	6.05422	3.41366	1.51606		100		60.1406	1.38554	15.6726	8.98595	0.240964	2.59036	6.05422	3.41366	1.51606		100					62.6	157.2	44.6	189.2	7.6		270	18.7	41.5	5	24	6.1	1.5	7.6		7.7
SAVP	15	T	Santorini	X-1	Upper Scoria 1	59.5802	1.43603	15.5754	9.80117	0.210886	2.24944	5.7843	3.91645	1.44607		100		59.5802	1.43603	15.5754	9.80117	0.210886	2.24944	5.7843	3.91645	1.44607		100					48	175.9	33.9	148.5	5.8		216.5	14.3	31.9	4.1	18.5	5.1	1.3	5.2		5.9
SAVP	15	T	Santorini	X-1	Upper Scoria 1	60.9822	1.30561	15.8984	8.73757	0.210907	2.13919	5.65431	3.38456	1.68725		100		60.9822	1.30561	15.8984	8.73757	0.210907	2.13919	5.65431	3.38456	1.68725		100					50.5	199.3	38.2	166.1	6.4		235.9	16.7	35.9	4.7	18.5	4.8	1.4	5.8		7
SAVP	15	T	Santorini	X-1	Upper Scoria 1	60.4901	1.21522	15.4766	8.87818	0.200864	2.57105	5.61414	3.86662	1.68725		100		60.4901	1.21522	15.4766	8.87818	0.200864	2.57105	5.61414	3.86662	1.68725		100
SAVP	15	T	Santorini	X-1	Upper Scoria 1	60.2528	1.00321	17.486	7.16292	0.140449	1.89607	6.51083	4.23354	1.3142		100		60.2528	1.00321	17.486	7.16292	0.140449	1.89607	6.51083	4.23354	1.3142		100
SAVP	15	T	Santorini	X-1	Upper Scoria 1	61.3367	1.13568	16.392	7.70854	0.190955	1.9598	5.66835	4	1.60804		100		61.3367	1.13568	16.392	7.70854	0.190955	1.9598	5.66835	4	1.60804		100
SAVP	15	T	Santorini	X-1	Upper Scoria 1	61.2618	1.27587	15.7525	8.00683	0.21097	2.32067	5.47518	3.96826	1.72795		100		61.2618	1.27587	15.7525	8.00683	0.21097	2.32067	5.47518	3.96826	1.72795		100
SAVP	15	T	Santorini	X-1	Upper Scoria 1	60.1466	1.33548	15.4835	9.28809	0.160659	2.52034	5.50257	3.90601	1.65679		100		60.1466	1.33548	15.4835	9.28809	0.160659	2.52034	5.50257	3.90601	1.65679		100
SAVP	15	T	Santorini	X-1	Upper Scoria 1	60.87	1.23568	15.7123	8.46896	0.241109	2.29054	5.44505	3.86779	1.86859		100		60.87	1.23568	15.7123	8.46896	0.241109	2.29054	5.44505	3.86779	1.86859		100
SAVP	15	T	Santorini	X-1	Upper Scoria 1	60.932	1.31565	16.1595	8.19524	0.200864	2.21955	5.79492	3.70594	1.47635		100		60.932	1.31565	16.1595	8.19524	0.200864	2.21955	5.79492	3.70594	1.47635		100					47.7	163.1	31.5	146	5.7		210.2	13.6	30.1	3.8	16.5	4.5	1.3	4.5		5.6
SAVP	15	T	Santorini	X-1	Upper Scoria 1	60.9298	1.18486	15.8851	8.29401	0.230947	2.14881	5.5829	4.06668	1.67688		100		60.9298	1.18486	15.8851	8.29401	0.230947	2.14881	5.5829	4.06668	1.67688		100					37	252.2	22.8	98.3	4.3		182.6	10	21.5	2.8	11.2	3.5	1.1	3.6		4.3
SAVP	15	T	Santorini	X-1	Upper Scoria 1	61.2372	1.21511	16.0775	8.15425	0.170717	1.98835	5.46295	3.86624	1.82768		100		61.2372	1.21511	16.0775	8.15425	0.170717	1.98835	5.46295	3.86624	1.82768		100					58.2	194.7	41.2	190.6	7.5		261.6	17.9	40	5	22	5.8	1.4	5.9		7.6
SAVP	15	T	Santorini	X-1	Upper Scoria 1	60.5482	1.20494	15.7245	8.18355	0.190782	2.54041	6.29581	3.7554	1.55638		100		60.5482	1.20494	15.7245	8.18355	0.190782	2.54041	6.29581	3.7554	1.55638		100					48.3	217.1	35.2	157.2	6.3		241.2	15	33.7	4	17	4.9	1.4	5.5		6.2
SAVP	15	T	Santorini	X-1	Upper Scoria 1	60.8377	1.18521	15.8096	8.3869	0.170751	2.23986	5.59461	4.01768	1.75774		100		60.8377	1.18521	15.8096	8.3869	0.170751	2.23986	5.59461	4.01768	1.75774		100					46.5	166.2	26.6	119.9	4.8		186.8	12.5	26.4	3.2	16.2	4.4	1.1	4.3		4.7
SAVP	15	T	Santorini	X-1	Upper Scoria 1	60.47	1.27548	15.6674	8.56685	0.200864	2.38023	5.73466	4.05745	1.64709		100		60.47	1.27548	15.6674	8.56685	0.200864	2.38023	5.73466	4.05745	1.64709		100					45.9	212.3	32.6	143.9	5.6		224.4	14	31.3	3.6	17.5	4.4	1.3	5.3		5.7
SAVP	15	T	Santorini	X-1	Upper Scoria 1	60.4298	1.16501	16.1896	8.33584	0.180777	2.02872	5.47354	4.4893	1.70734		100		60.4298	1.16501	16.1896	8.33584	0.180777	2.02872	5.47354	4.4893	1.70734		100					77.9	146.3	48.9	244.3	9.4		346.6	23.6	51.3	6	26.9	6.6	1.5	7.8		8.3
SAVP	15	T	Santorini	X-1	Upper Scoria 1	61.0207	1.23569	15.7223	8.479	0.170786	2.28049	5.47519	3.79747	1.81837		100		61.0207	1.23569	15.7223	8.479	0.170786	2.28049	5.47519	3.79747	1.81837		100					40.9	195.1	22.6	99.1	4.4		173.6	10.8	23.4	2.6	12.8	3.9	1	4.2		3.9
SAVP	15	T	Santorini	X-1	Upper Scoria 1	61.2634	1.18509	15.6774	8.38606	0.210907	2.00864	5.18228	4.3487	1.73747		100		61.2634	1.18509	15.6774	8.38606	0.210907	2.00864	5.18228	4.3487	1.73747		100
SAVP	15	T	Santorini	X-1	Upper Scoria 1	60.9259	1.23519	15.9972	8.37518	0.301265	1.9783	5.31231	3.99679	1.87788		100		60.9259	1.23519	15.9972	8.37518	0.301265	1.9783	5.31231	3.99679	1.87788		100
SAVP	15	T	Santorini	X-1	Upper Scoria 1	59.4375	1.40633	15.791	9.47262	0.190859	2.60171	6.02712	3.47564	1.59719		100		59.4375	1.40633	15.791	9.47262	0.190859	2.60171	6.02712	3.47564	1.59719		100					51.9	195.3	37.8	167.4	6.8		240.8	15.9	35.8	4.4	20.3	5.2	1.5	6.5		6.7
SAVP	15	T	Santorini	X-1	Upper Scoria 1	58.0315	1.2441	15.9827	8.89937	0.210695	3.34103	6.89274	4.21391	1.18391		100		58.0315	1.2441	15.9827	8.89937	0.210695	3.34103	6.89274	4.21391	1.18391		100					47	170.5	30.4	136.1	5.4		200.2	13.3	28.3	3.8	15.2	4.6	1.1	5.2		5.2
SAVP	15	T	Santorini	X-1	Upper Scoria 1	60.3595	1.44622	15.5569	8.95852	0.200864	2.45054	5.73467	3.51512	1.77764		100		60.3595	1.44622	15.5569	8.95852	0.200864	2.45054	5.73467	3.51512	1.77764		100					51.2	181	37.2	164.8	6.6		242.4	16.2	36.9	4.5	18.5	4.4	1.4	4.9		6.1
SAVP	15	T	Santorini	X-1	Upper Scoria 1	58.6636	1.14377	18.4108	6.71215	0.13043	1.76583	7.29406	4.71556	1.16384		100		58.6636	1.14377	18.4108	6.71215	0.13043	1.76583	7.29406	4.71556	1.16384		100					53.9	188.5	38.9	167.1	6.8		240.7	16.6	35.6	4.6	19.7	5.1	1.4	5.9		6.6
SAVP	15	T	Santorini	X-1	Upper Scoria 1	59.3995	1.42599	15.3042	9.45974	0.220928	2.65114	6.18599	3.82607	1.52641		100		59.3995	1.42599	15.3042	9.45974	0.220928	2.65114	6.18599	3.82607	1.52641		100					46.2	210.7	31.4	140.5	5.2		211.9	13.6	31.1	3.7	16	4.9	1.4	4.6		5.9
SAVP	15	T	Santorini	X-1	Upper Scoria 1	59.2871	1.41566	14.8293	9.86948	0.190763	3.68474	6.19478	2.98193	1.54618		100		59.2871	1.41566	14.8293	9.86948	0.190763	3.68474	6.19478	2.98193	1.54618		100					59.7	182.7	39.6	176.5	6.8		254.7	16.8	39.2	4.4	20.3	4.8	1.5	6.6		6.8
SAVP	15	T	Santorini	X-1	Upper Scoria 1	58.9906	1.16396	17.4894	7.85671	0.200682	2.16737	6.8533	4.03371	1.24423		100		58.9906	1.16396	17.4894	7.85671	0.200682	2.16737	6.8533	4.03371	1.24423		100
SAVP	15	T	Santorini	X-1	Upper Scoria 1	59.8313	1.42598	15.3645	10.1225	0.150633	2.51054	5.80438	3.16328	1.62683		100		59.8313	1.42598	15.3645	10.1225	0.150633	2.51054	5.80438	3.16328	1.62683		100
SAVP	15	T	Santorini	X-1	Upper Scoria 1	59.5841	1.40647	15.1597	9.72474	0.231063	2.80289	6.09805	3.39562	1.59734		100		59.5841	1.40647	15.1597	9.72474	0.231063	2.80289	6.09805	3.39562	1.59734		100					57	186.2	38.2	170.5	6.5		252.2	17.7	37.5	4.6	20	5.6	1.4	6.2		6.6
SAVP	15	T	Santorini	X-1	Upper Scoria 1	58.5241	1.3253	15.9538	8.98594	0.160643	2.75101	6.69679	4.1265	1.47591		100		58.5241	1.3253	15.9538	8.98594	0.160643	2.75101	6.69679	4.1265	1.47591		100					53.8	174.2	38.3	168.9	6.3		240.2	16.9	36.1	4.4	19.1	5.3	1.3	6.7		6.9
SAVP	15	T	Santorini	X-1	Upper Scoria 1	57.9618	1.50602	14.9498	9.90964	0.190763	3.78514	6.71686	3.7751	1.20482		100		57.9618	1.50602	14.9498	9.90964	0.190763	3.78514	6.71686	3.7751	1.20482		100					39.9	199.3	23.2	107	4.5		164.6	10.3	24.5	2.9	12.4	4.4	1.1	5		4.6
SAVP	15	T	Santorini	X-1	Upper Scoria 1	58.2689	1.46601	15.2927	9.63952	0.1707	3.28346	6.57697	3.87589	1.42585		100		58.2689	1.46601	15.2927	9.63952	0.1707	3.28346	6.57697	3.87589	1.42585		100					57.9	170.5	38.3	173.1	6.8		248.8	16.7	37	4.5	20.4	5.3	1.4	5.9		6.7
SAVP	15	T	Santorini	X-1	Upper Scoria 1	58.8194	1.67654	13.9946	11.1033	0.230901	3.14225	6.19416	3.13222	1.70666		100		58.8194	1.67654	13.9946	11.1033	0.230901	3.14225	6.19416	3.13222	1.70666		100					52.4	159.5	34.8	163.4	6.8		232.1	15.5	34.5	4.3	19.3	4.7	1.4	5.4		6.4
SAVP	15	T	Santorini	X-1	Upper Scoria 1	58.4472	1.55685	14.4135	10.5866	0.200884	3.18401	6.14704	3.92728	1.53676		100		58.4472	1.55685	14.4135	10.5866	0.200884	3.18401	6.14704	3.92728	1.53676		100					55.1	143.6	31.5	148.8	6		217.1	14	32.2	4.1	17.8	6	1.1	5.3		6
SAVP	15	T	Santorini	X-1	Upper Scoria 1	60.7957	1.69798	14.4078	10.0372	0.170803	2.09987	5.10398	3.7878	1.89893		100		60.7957	1.69798	14.4078	10.0372	0.170803	2.09987	5.10398	3.7878	1.89893		100					42.9	226.3	27.1	118.4	4.6		164.9	11.7	26.3	3.4	14.5	4.6	1.2	4.3		4.6
SAVP	15	T	Santorini	X-1	Upper Scoria 1	59.8093	1.27446	17.4009	7.39588	0.140492	1.39488	6.2017	4.76668	1.61566		100		59.8093	1.27446	17.4009	7.39588	0.140492	1.39488	6.2017	4.76668	1.61566		100					62.5	156	34.3	162.9	6.7		252.7	15.9	36	4.4	18.1	6.1	1.2	5.2		6.3
SAVP	15	T	Santorini	X-1	Upper Scoria 1	61.7942	1.35624	15.4712	8.11734	0.200924	1.61744	5.21398	4.28973	1.93892		100		61.7942	1.35624	15.4712	8.11734	0.200924	1.61744	5.21398	4.28973	1.93892		100					55.2	150.5	32.7	146.7	5.7		229.2	14.8	30.9	4.1	17.4	5.4	1.2	5.4		5.6
SAVP	15	T	Santorini	X-1	Upper Scoria 1	59.7829	1.57773	14.0287	10.5316	0.241182	2.47211	5.62757	3.74836	1.98975		100		59.7829	1.57773	14.0287	10.5316	0.241182	2.47211	5.62757	3.74836	1.98975		100					55	133	33.3	150.3	6.5		214.3	14.8	33.1	3.9	18.4	5.6	1.1	5.9		5.8
SAVP	15	T	Santorini	X-1	Upper Scoria 1	60.5927	1.50678	14.3446	9.81416	0.190859	2.31039	5.15318	4.07835	2.00904		100		60.5927	1.50678	14.3446	9.81416	0.190859	2.31039	5.15318	4.07835	2.00904		100					57	158.7	35.3	158.6	6.7		250.6	16.3	34.6	5.1	20.3	5.7	1.3	7.7		5.5
SAVP	15	T	Santorini	X-1	Upper Scoria 1	59.8935	1.36601	16.0908	8.42707	0.19084	2.24989	6.07673	4.19847	1.50663		100		59.8935	1.36601	16.0908	8.42707	0.19084	2.24989	6.07673	4.19847	1.50663		100					54	146.2	37.3	161.4	6.3		229.9	15.9	34.5	4.4	19.2	5.3	1.3	6.5		6.2
SAVP	15	T	Santorini	X-1	Upper Scoria 1	59.6345	1.44593	14.8911	10.2621	0.180741	2.85169	6.14519	2.9521	1.63671		100		59.6345	1.44593	14.8911	10.2621	0.180741	2.85169	6.14519	2.9521	1.63671		100
SAVP	15	T	Santorini	X-1	Upper Scoria 1	60.496	1.53599	14.5868	10.4106	0.190744	2.44956	5.69219	2.69049	1.9476		100		60.496	1.53599	14.5868	10.4106	0.190744	2.44956	5.69219	2.69049	1.9476		100
SAVP	15	T	Santorini	X-1	Upper Scoria 1	59.6184	1.44578	15.1004	9.70884	0.281125	2.79116	6.0241	3.42369	1.60643		100		59.6184	1.44578	15.1004	9.70884	0.281125	2.79116	6.0241	3.42369	1.60643		100
SAVP	15	T	Santorini	X-1	Upper Scoria 1	59.5262	1.31499	15.3583	9.67678	0.250954	2.70027	6.30396	3.41297	1.45553		100		59.5262	1.31499	15.3583	9.67678	0.250954	2.70027	6.30396	3.41297	1.45553		100
SAVP	17	M	Santorini	X-1	Upper Scoria 1	57.09	1.4144	15.23	9.59	0.2186	2.87	6.09	3.03	1.48	0.2054	97.2185		58.7234	1.45487	15.6657	9.86438	0.224854	2.95211	6.26424	3.11669	1.52234	0.211277	99.9999			11.22	27.73	53.38	199.92	36.48	161.11	6.27	1.83	233.58	15.57	34.09	4.4	19.08	4.72	1.363	5.49	0.993	6.55	1.26
SAVP	17	M	Santorini	X-1	Upper Scoria 1	57.81	1.3487	15.33	9.59	0.1212	2.84	6.08	3.2	1.59	0.1996	98.1096		58.9239	1.37469	15.6254	9.77478	0.123535	2.89472	6.19715	3.26166	1.62064	0.203446	99.9999			14.96	27.55	62.05	184.5	36.92	162.92	6.72	1.76	266.05	17.01	39.37	4.65	19.45	5	1.27	5.44	0.92	6.26	1.47
SAVP	17	M	Santorini	X-1	Upper Scoria 1	58.37	1.3993	15.18	9.39	0.2728	2.82	6.15	3.4	1.54	0.2139	98.736		59.1172	1.41721	15.3743	9.51021	0.276292	2.8561	6.22873	3.44353	1.55971	0.216638	100			10.18	24.68	60.99	202.52	34.77	155.41	6.5	1.8	261.52	16.19	38.2	4.78	18.34	5.03	1.47	6.08	0.817	5.92	1.26
SAVP	17	M	Santorini	X-1	Upper Scoria 1	57.93	1.2714	16	8.82	0.2575	2.55	6.2	4.11	1.45	0.2132	98.8022		58.6323	1.28681	16.194	8.92693	0.260622	2.58091	6.27516	4.15983	1.46758	0.215785	99.9999			11.9	28.94	65.06	190.09	38.2	171.92	7.46	2.15	253.26	16.82	37.97	4.55	19.79	5.51	1.42	5.62	0.944	6.73	1.52
SAVP	17	M	Santorini	X-1	Upper Scoria 1	57.38	1.3254	15.28	8.74	0.2121	2.79	6.09	3.77	1.52	0.2161	97.3237		58.9579	1.36185	15.7002	8.98034	0.217933	2.86672	6.25747	3.87367	1.5618	0.222043	99.9999			13.35	29.07	59.52	180.15	37.81	168.87	7.13	1.97	234.9	16.87	37.08	4.66	19.88	5.64	1.43	5.99	0.971	7.06	1.43
SAVP	17	M	Santorini	X-1	Upper Scoria 1	58.02	1.3359	15.22	9.09	0.1588	2.7	6.03	3.65	1.53	0.2067	97.9415		59.2394	1.36398	15.5399	9.28105	0.162138	2.75675	6.15674	3.72671	1.56216	0.211044	99.9999
SAVP	17	M	Santorini	X-1	Upper Scoria 1	57.37	1.3085	15.33	9.82	0.0883	2.87	6.34	3.45	1.51	0.1955	98.2824		58.3726	1.33137	15.5979	9.99162	0.0898431	2.92016	6.4508	3.51029	1.53639	0.198917	99.9999
SAVP	17	M	Santorini	X-1	Upper Scoria 1	57.62	1.3829	15.06	10.07	0.2262	2.82	6.1	3.55	1.53	0.1603	98.5194		58.4859	1.40368	15.2863	10.2213	0.229599	2.86238	6.19167	3.60335	1.55299	0.162709	100
SAVP	17	M	Santorini	X-1	Upper Scoria 1	57.6	1.3432	15.22	9.73	0.1564	2.82	6.09	3.61	1.57	0.1581	98.2978		58.5974	1.36646	15.4836	9.89849	0.159108	2.86883	6.19546	3.67251	1.59719	0.160838	99.9999
SAVP	17	M	Santorini	X-1	Upper Scoria 1	57.65	1.386	15.4	9.19	0.1095	2.72	5.97	3.57	1.56	0.1675	97.7231		58.9932	1.41829	15.7588	9.40412	0.112051	2.78337	6.1091	3.65318	1.59635	0.171403	99.9999
SAVP	17	M	Santorini	X-1	Upper Scoria 1	57.73	1.3748	15.31	9.45	0.2108	2.84	5.9	3.55	1.57	0.1811	98.1168		58.838	1.40119	15.6039	9.63138	0.214846	2.89451	6.01324	3.61814	1.60013	0.184576	99.9999
SAVP	17	M	Santorini	X-1	Upper Scoria 1	57.69	1.3423	15.13	8.57	0.1485	2.76	6.01	3.65	1.58	0.1667	97.0476		59.4451	1.38314	15.5903	8.83072	0.153018	2.84397	6.19284	3.76104	1.62807	0.171771	99.9999
SAVP	17	M	Santorini	X-1	Upper Scoria 1	57.02	1.4889	15.43	9.76	0.1645	3	6.63	3.77	1.4	0.2043	98.8677		57.673	1.50595	15.6067	9.87178	0.166384	3.03436	6.70593	3.81318	1.41603	0.20664	100
SAVP	17	M	Santorini	X-1	Upper Scoria 1	55.86	1.5104	14.97	10.29	0.1512	2.89	6.5	3.34	1.47	0.224	97.2057		57.4658	1.55382	15.4003	10.5858	0.155546	2.97308	6.68685	3.43601	1.51226	0.230439	99.9999
SAVP	17	M	Santorini	X-1	Upper Scoria 1	55.3	1.5069	14.38	11.01	0.2028	3.23	6.25	3.04	1.47	0.1484	96.5381		57.2831	1.56094	14.8957	11.4048	0.210072	3.34583	6.47413	3.14902	1.52271	0.153722	100
SAVP	17	M	Santorini	X-1	Upper Scoria 1	56.61	1.4469	14.85	10.74	0.2005	3.15	6.31	2.91	1.54	0.1777	97.9352		57.8035	1.47741	15.1631	10.9664	0.204727	3.21641	6.44304	2.97135	1.57247	0.181447	99.9999
SAVP	17	M	Santorini	X-1	Upper Scoria 1	57.76	1.3423	14.87	10.05	0.1852	2.95	6.06	2.87	1.55	0.1786	97.8161		59.0496	1.37227	15.202	10.2744	0.189335	3.01586	6.1953	2.93408	1.58461	0.182588	100
SAVP	17	M	Santorini	X-1	Upper Scoria 1	56.33	1.5527	14.43	10.64	0.2049	3.37	6.47	2.85	1.47	0.1532	97.4709		57.7916	1.59299	14.8044	10.9161	0.210217	3.45744	6.63788	2.92395	1.50814	0.157175	99.9999
SAVP	17	M	Santorini	X-1	Upper Scoria 1	56.9	1.3696	15.76	9.09	0.1572	2.93	6.62	3.64	1.33	0.1871	97.984		58.0707	1.39778	16.0843	9.27702	0.160434	2.99028	6.75621	3.71489	1.35736	0.19095	99.9999
SAVP	17	M	Santorini	X-1	Upper Scoria 1	57.55	1.258	15.64	7.94	0.1956	3.14	6.6	4.14	1.4	0.0933	97.957		58.7503	1.28424	15.9662	8.1056	0.199679	3.20549	6.73765	4.22634	1.4292	0.0952459	99.9999
SAVP	17	M	Santorini	X-1	Upper Scoria 1	56.52	1.403	15.59	9.78	0.1639	2.89	6.56	3.4	1.31	0.1414	97.7584		57.816	1.43517	15.9475	10.0043	0.167658	2.95627	6.71042	3.47796	1.34004	0.144642	99.9999
SAVP	17	M	Santorini	X-1	Upper Scoria 1	57.42	1.3606	15.38	8.77	0.1513	2.53	5.85	3.47	1.55	0.2237	96.7057		59.376	1.40695	15.9039	9.06875	0.156454	2.61618	6.04928	3.58821	1.6028	0.23132	99.9999
SAVP	17	M	Santorini	X-1	Upper Scoria 1	57.07	1.3473	14.96	9.06	0.2775	2.64	6.01	3.47	1.46	0.1372	96.432		59.1816	1.39715	15.5135	9.39522	0.287768	2.73768	6.23237	3.59839	1.51402	0.142276	100
SAVP	4	T	Santorini		Vourvoulos	65.9	0.79	14.7	6.44	0.16	1.02	3.52	4.57	2.64	0.25	99.99		65.9066	0.790079	14.7015	6.44064	0.160016	1.0201	3.52035	4.57046	2.64026	0.250025	100					87	137	59	289	11		417	25	75
SAVP	4	T	Santorini		Vourvoulos	57.8	1.42	15.5	9.71	0.2	3.03	6.93	3.68	1.51	0.19	99.97		57.8173	1.42043	15.5047	9.71291	0.20006	3.03091	6.93208	3.6811	1.51045	0.190057	100					52	188	43	181	7		292	18	25
SAVP	6	T	Santorini		Vourvoulos	56.8	1.49	15.7	10.37	0.18	3.36	7.41	3.2	1.79	0.19	100.49		56.523	1.48273	15.6234	10.3194	0.179122	3.34362	7.37387	3.1844	1.78127	0.189074	100					51	197	41	170	7		206	18	36
SAVP	6	T	Santorini		Vourvoulos	57.8	1.41	15.5	9.72	2.2	3.03	6.93	3.68	1.51	0.19	101.97		56.6833	1.38276	15.2005	9.53222	2.1575	2.97146	6.79612	3.6089	1.48083	0.186329	100					52	188	43	181	7		292	18	25
SAVP	6	T	Santorini		Vourvoulos	62.6	1.1	15.4	7.48	0.16	1.75	4.65	4.66	1.99	0.26	100.05		62.5687	1.09945	15.3923	7.47626	0.15992	1.74913	4.64768	4.65767	1.98901	0.25987	100					77	176	58	250	10		376	19	68
SAVP	6	T	Santorini		Vourvoulos	63.3	1	15	7.26	0.16	1.65	4.52	4.71	2.17	0.25	100.02		63.2873	0.9998	14.997	7.25855	0.159968	1.64967	4.5191	4.70906	2.16957	0.24995	100					77	163	53	259	10		364	23	58
SAVP	6	T	Santorini		Vourvoulos	65.4	0.84	14.9	6.32	0.17	1.12	3.76	4.78	2.49	0.23	100.01		65.3935	0.839916	14.8985	6.31937	0.169983	1.11989	3.75962	4.77952	2.48975	0.229977	100					85	146	60	285	12		413	32	71
SAVP	6	T	Santorini		Vourvoulos	65.4	0.81	15.1	6.31	0.18	1.12	3.6	4.84	2.5	0.19	100.05		65.3673	0.809595	15.0925	6.30685	0.17991	1.11944	3.5982	4.83758	2.49875	0.189905	100					88	150	62	292	11		411	25	68
SAVP	6	T	Santorini		Vourvoulos	65.6	0.77	14.8	6.23	0.19	1.12	3.49	4.96	2.63	0.2	99.99		65.6066	0.770077	14.8015	6.23062	0.190019	1.12011	3.49035	4.9605	2.63026	0.20002	100					87	142	59	274	9		430	22	43
SAVP	6	T	Santorini		Vourvoulos	65.6	0.83	14.8	5.71	0.19	1.06	3.57	4.89	2.47	0.21	99.33		66.0425	0.835599	14.8998	5.74852	0.191282	1.06715	3.59408	4.92298	2.48666	0.211416	100					83	141	61	284	11		394	20	58
SAVP	6	T	Santorini		Vourvoulos	65.8	0.8	14.8	6.46	0.19	1.02	3.59	4.58	2.53	0.22	99.99		65.8066	0.80008	14.8015	6.46065	0.190019	1.0201	3.59036	4.58046	2.53025	0.220022	100					85	141	60	288	11		419	28	53
SAVP	6	T	Santorini		Vourvoulos	65.8	0.79	15.1	6.21	0.17	1.06	3.47	4.8	2.54	0.2	100.14		65.708	0.788896	15.0789	6.20132	0.169762	1.05852	3.46515	4.79329	2.53645	0.19972	100					92	146	61	289	12		420	30	55
SAVP	6	T	Santorini		Vourvoulos	65.9	0.79	14.8	6.44	0.16	1.02	3.52	4.57	2.64	0.22	100.06		65.8605	0.789526	14.7911	6.43614	0.159904	1.01939	3.51789	4.56726	2.63842	0.219868	100					87	137	59	289	11		417	25	75
SAVP	15	T	Santorini		Vourvolous	63.8272	0.934203	15.5801	6.72024	0.210949	1.38624	4.34957	4.81165	2.17981		100		63.8272	0.934203	15.5801	6.72024	0.210949	1.38624	4.34957	4.81165	2.17981		100					78.8	188.7	50	247.2	9.5		366.7	23.4	51.5	6	28.1	7	1.9	6.9		8.8
SAVP	15	T	Santorini		Vourvolous	63.8657	0.964921	15.5192	6.85496	0.180923	1.37702	4.21148	4.92512	2.10072		100		63.8657	0.964921	15.5192	6.85496	0.180923	1.37702	4.21148	4.92512	2.10072		100					95.4	141.7	55.1	294.3	10.9		379.4	27	57.8	6.8	29.7	7	1.8	7.6		9.5
SAVP	15	T	Santorini		Vourvolous	64.2125	0.954199	15.4379	6.39815	0.200884	1.42628	4.18843	5.05224	2.12937		100		64.2125	0.954199	15.4379	6.39815	0.200884	1.42628	4.18843	5.05224	2.12937		100					89.2	151.4	52.9	265.3	9.9		355.4	25.9	55.6	6.9	31.3	7	1.8	8.9		9.4
SAVP	15	T	Santorini		Vourvolous	64.0225	0.963952	15.6441	6.86816	0.160659	1.38569	4.24741	4.6591	2.0484		100		64.0225	0.963952	15.6441	6.86816	0.160659	1.38569	4.24741	4.6591	2.0484		100					87	136.2	53.4	261.6	9.7		343.1	24.4	54.6	6.2	29.7	7.5	1.7	8.5		9.6
SAVP	15	T	Santorini		Vourvolous	63.8986	0.955062	15.4519	7.0373	0.180959	1.41751	4.17212	4.84569	2.04082		100		63.8986	0.955062	15.4519	7.0373	0.180959	1.41751	4.17212	4.84569	2.04082		100					79.8	152.9	48	237.1	8.7		320.2	22.4	49.4	5.9	27.8	7.4	1.5	7.4		8.4
SAVP	15	T	Santorini		Vourvolous	64.629	0.904887	15.1015	6.75649	0.120652	1.42771	3.8709	4.81601	2.37281		100		64.629	0.904887	15.1015	6.75649	0.120652	1.42771	3.8709	4.81601	2.37281		100					79.9	155.5	47.1	236.2	8.7		325.9	22.4	48.6	5.8	27.1	6.9	1.7	7.1		8.1
SAVP	15	T	Santorini		Vourvolous	64.1479	0.954583	15.4441	6.85289	0.140675	1.38666	4.09968	4.8332	2.14028		100		64.1479	0.954583	15.4441	6.85289	0.140675	1.38666	4.09968	4.8332	2.14028		100					91.9	97.4	59.8	297.6	10.4		377.6	25.9	57.8	6.6	31.1	8.9	1.6	8.8		10.2
SAVP	15	T	Santorini		Vourvolous	64.1479	0.954583	15.4441	6.85289	0.140675	1.38666	4.09968	4.8332	2.14028		100		64.1479	0.954583	15.4441	6.85289	0.140675	1.38666	4.09968	4.8332	2.14028		100					81.4	143.2	45.6	226.2	8.5		317.7	21.4	48.4	5.9	27	6.5	1.5	6.2		8.8
SAVP	15	T	Santorini		Vourvolous	64.3152	0.944629	15.6165	6.6124	0.13064	1.40689	4.13024	4.72314	2.12039		100		64.3152	0.944629	15.6165	6.6124	0.13064	1.40689	4.13024	4.72314	2.12039		100					78.3	172.9	48.4	232.8	8.9		338.9	22.5	50.1	6.1	27	6.8	1.6	7.6		8.2
SAVP	15	T	Santorini		Vourvolous	64.1464	0.904886	15.4736	6.63583	0.160869	1.39755	4.16247	4.98693	2.13151		100		64.1464	0.904886	15.4736	6.63583	0.160869	1.39755	4.16247	4.98693	2.13151		100					77.7	128.1	41.6	210.4	8.3		296.9	19.8	44.4	5.6	23.3	6.3	1.4	7.4		7.1
SAVP	15	T	Santorini		Vourvolous	64.534	0.934111	15.6789	6.36802	0.170751	1.30575	4.23866	4.82122	1.94857		100		64.534	0.934111	15.6789	6.36802	0.170751	1.30575	4.23866	4.82122	1.94857		100					73.8	137.5	42.3	213.6	7.2		297.6	20.6	44.6	5.1	24.4	0	1.4	7.3		7.5
SAVP	15	T	Santorini		Vourvolous	64.2699	0.935237	15.4666	6.42599	0.271521	1.38777	4.22365	4.92759	2.09171		100		64.2699	0.935237	15.4666	6.42599	0.271521	1.38777	4.22365	4.92759	2.09171		100					76.9	156.7	47.9	236.1	9.1		334	23.4	52.3	5.8	27.2	7.4	1.4	7.9		8.2
SAVP	15	T	Santorini		Vourvolous	64.0073	0.894293	15.5747	6.78255	0.271302	1.33641	4.10973	4.91359	2.11013		100		64.0073	0.894293	15.5747	6.78255	0.271302	1.33641	4.10973	4.91359	2.11013		100					53.7	203.4	42	186.1	6.4		263.7	18.5	40.2	5.1	23.6	5.9	1.5	6.4		7.6
SAVP	15	T	Santorini		Vourvolous	63.5587	0.854014	15.8144	6.73164	0.210992	1.51714	4.31026	5.02361	1.97931		100		63.5587	0.854014	15.8144	6.73164	0.210992	1.51714	4.31026	5.02361	1.97931		100					75.5	135.3	42.5	205.4	7.8		297.7	20.2	45	5.2	24.1	6.5	1.5	6.8		7.4
SAVP	15	T	Santorini		Vourvolous	63.9361	0.985023	15.3383	6.8248	0.24123	1.39712	4.17127	4.99547	2.11076		100		63.9361	0.985023	15.3383	6.8248	0.24123	1.39712	4.17127	4.99547	2.11076		100					71.4	107.4	35.5	178.9	7.5		243.8	16.9	39.6	4.3	19.9	8.4	1.4	7.1		5.8
SAVP	15	T	Santorini		Vourvolous	64.0072	0.934485	15.7356	6.47106	0.140675	1.36655	4.32074	4.95377	2.06993		100		64.0072	0.934485	15.7356	6.47106	0.140675	1.36655	4.32074	4.95377	2.06993		100					78.1	176.7	51.1	240.3	8.5		341.6	22.7	52.8	5.9	28	6	1.8	8.7		8.6
SAVP	15	T	Santorini		Vourvolous	63.8967	0.914389	15.3939	6.69212	0.160772	1.3967	4.35088	5.16479	2.02974		100		63.8967	0.914389	15.3939	6.69212	0.160772	1.3967	4.35088	5.16479	2.02974		100					81	158.1	51.5	243.3	8.6		336.9	23.6	51.9	6.4	26.8	7.4	1.5	7.1		8.3
SAVP	15	T	Santorini		Vourvolous	64.0933	0.954966	15.1186	7.29795	0.231202	1.47769	3.96059	4.61399	2.2517		100		64.0933	0.954966	15.1186	7.29795	0.231202	1.47769	3.96059	4.61399	2.2517		100					67.9	130	41.6	192.3	7.7		270	18.5	42.2	4.7	23.5	5.4	1.4	6.2		7.6
SAVP	15	T	Santorini		Vourvolous	64.2764	0.893843	15.3159	7.00009	0.160691	1.37591	4.07753	4.85086	2.04881		100		64.2764	0.893843	15.3159	7.00009	0.160691	1.37591	4.07753	4.85086	2.04881		100					78.7	150.3	46.9	227.3	8.5		318.8	22.1	47.4	5.7	25.9	6.2	1.6	6.5		8.4
SAVP	15	T	Santorini		Vourvolous	64.7678	0.531542	15.876	5.67647	0.130378	1.33387	4.27239	5.38562	2.02587		100		64.7678	0.531542	15.876	5.67647	0.130378	1.33387	4.27239	5.38562	2.02587		100					69.6	143.4	45.7	204.9	7.8		298.1	21	45	5.7	23.5	0	1.5	6.2		7.5
SAVP	15	T	Santorini		Vourvolous	68.1247	0.824535	13.7858	5.90246	0.120664	0.613373	3.01659	4.80643	2.80543		100		68.1247	0.824535	13.7858	5.90246	0.120664	0.613373	3.01659	4.80643	2.80543		100					79.2	156.5	47	222	8.6		321.9	21.5	48.4	6.1	28.4	5.5	1.7	8.3		7.6
SAVP	15	T	Santorini		Vourvolous	67.9081	0.772937	15.2379	4.74805	0.100381	0.341297	3.31259	5.04919	2.52961		100		67.9081	0.772937	15.2379	4.74805	0.100381	0.341297	3.31259	5.04919	2.52961		100					65.1	167.2	48.9	222.1	7.7		306.2	21.9	47.5	5.7	27.3	7.2	1.5	6.9		8.6
SAVP	15	T	Santorini		Vourvolous	67.5523	0.805153	14.0399	5.86755	0.181159	0.774959	3.23068	4.86111	2.6872		100		67.5523	0.805153	14.0399	5.86755	0.181159	0.774959	3.23068	4.86111	2.6872		100					77.3	158.8	49.8	237.3	9.5		336	24	50.9	6	27.1	6.8	1.7	6.9		8.8
SAVP	15	T	Santorini		Vourvolous	65.344	0.612757	16.9664	4.6007	0.120542	0.693119	4.36966	5.26368	2.02913		100		65.344	0.612757	16.9664	4.6007	0.120542	0.693119	4.36966	5.26368	2.02913		100
SAVP	15	T	Santorini		Vourvolous	65.5588	0.612512	17.1302	4.2675	0.0702882	0.451853	4.41812	5.35194	2.13877		100		65.5588	0.612512	17.1302	4.2675	0.0702882	0.451853	4.41812	5.35194	2.13877		100
SAVP	15	T	Santorini		Vourvolous	63.619	0.984628	15.5732	7.04311	0.281322	1.45685	4.22988	4.74229	2.06973		100		63.619	0.984628	15.5732	7.04311	0.281322	1.45685	4.22988	4.74229	2.06973		100
SAVP	15	T	Santorini		Vourvolous	63.9807	0.97458	15.4727	6.93258	0.160755	1.36642	4.11936	4.74228	2.25058		100		63.9807	0.97458	15.4727	6.93258	0.160755	1.36642	4.11936	4.74228	2.25058		100
SAVP	17	M	Santorini		Vourvolous	65.5	0.5922	14.16	5.21	0.1395	0.6478	2.04	4.79	2.01	0.1055	95.1951		68.8061	0.622091	14.8747	5.47297	0.146541	0.680497	2.14297	5.03177	2.11145	0.110825	99.9999			24.35	16.57	111.06	125.24	58.18	304.02	11.12	3.77	410.77	28.55	62.33	7.54	31.68	8.46	1.757	8.52	1.415	9.79	2.13
SAVP	17	M	Santorini		Vourvolous	64.53	0.611	14.23	4.93	0.1531	0.6512	2.81	4.74	2.54	0.0657	95.261		67.7402	0.641396	14.9379	5.17526	0.160716	0.683596	2.94979	4.9758	2.66636	0.0689684	100			22.81	17.75	108.07	126.34	58.51	306.59	11.05	3.63	417.29	27.88	58.75	7.34	31.54	7.94	1.66	9.15	1.562	10.09	2.24
SAVP	17	M	Santorini		Vourvolous	64.17	0.6909	14.33	5.73	0.1631	0.8264	3.19	4.74	2.42	0.1864	96.4469		66.534	0.716353	14.8579	5.94109	0.169109	0.856845	3.30752	4.91462	2.50915	0.193267	99.9999			19.69	15.97	101.64	128.49	57.83	294.17	10.3	3.49	385.3	27.61	57.01	7.08	30.5	7.11	1.65	8.34	1.351	9.96	2.04
SAVP	17	M	Santorini		Vourvolous	63.91	0.5674	14.01	5.02	0.1979	0.614	2.84	4.64	2.56	0.1745	94.5338		67.6054	0.600209	14.8201	5.31027	0.209343	0.649503	3.00422	4.9083	2.70803	0.18459	100			23.12	16.23	100.06	125.04	56.34	292.94	10.47	3.34	392.9	27.33	56.06	6.99	31.33	7.74	1.63	7.36	1.475	8.86	2.08
SAVP	17	M	Santorini		Vourvolous	61.16	0.5919	13.4	4.84	0.188	0.6858	2.73	4.21	2.36	0.1327	90.2985		67.7309	0.655493	14.8397	5.36	0.208198	0.759481	3.02331	4.66231	2.61355	0.146957	99.9999			19.77	14.99	100.72	122.48	55.35	284.67	9.95	3.3	373.8	26.06	55.3	6.74	29.59	7.42	1.456	8.27	1.365	8.68	1.97
SAVP	17	M	Santorini		Vourvolous	63.01	0.5608	13.86	4.96	0.1688	0.6588	2.69	4.75	2.44	0.1139	93.2123		67.5984	0.601637	14.8693	5.32119	0.181092	0.706774	2.88589	5.09589	2.61768	0.122194	100
SAVP	17	M	Santorini		Vourvolous	64.59	0.5932	14.21	5.22	0.2226	0.65	2.8	4.68	2.45	0.156	95.5719		67.5826	0.620685	14.8684	5.46186	0.232914	0.680116	2.92973	4.89684	2.56352	0.163228	99.9999
SAVP	17	M	Santorini		Vourvolous	64.61	0.6162	14.22	5.37	0.1072	0.6308	2.76	4.83	2.54	0.1361	95.8204		67.4282	0.643078	14.8403	5.60423	0.111876	0.658315	2.88039	5.04068	2.65079	0.142037	99.9999
SAVP	17	M	Santorini		Vourvolous	64.97	0.5983	14.3	5.43	0.1282	0.6545	2.76	4.89	2.53	0.0744	96.3355		67.4414	0.621059	14.844	5.63655	0.133077	0.679396	2.86499	5.07601	2.62624	0.0772301	99.9999
SAVP	17	M	Santorini		Vourvolous	63.02	0.775	14.05	6	0.0857	0.8765	3.19	4.93	2.4	0.1952	95.5225		65.974	0.811327	14.7086	6.28124	0.0897171	0.917585	3.33953	5.16109	2.5125	0.20435	99.9999
SAVP	17	M	Santorini		Vourvolous	62.8	0.6227	14.01	5.47	0.1524	0.6555	2.9	4.69	2.61	0.1206	94.0313		66.7863	0.662226	14.8993	5.81721	0.162074	0.697108	3.08408	4.9877	2.77567	0.128255	99.9999
SAVP	17	M	Santorini		Vourvolous	63.51	0.6786	14.2	5.56	0.1579	0.7733	2.95	4.83	2.42	0.1753	95.2551		66.6736	0.712403	14.9073	5.83696	0.165765	0.81182	3.09695	5.07059	2.54055	0.184032	100
SAVP	17	M	Santorini		Vourvolous	63.53	0.6162	14.13	5.12	0.1906	0.592	2.73	4.73	2.54	0.1628	94.3417		67.3403	0.653158	14.9775	5.42708	0.202032	0.627506	2.89374	5.01369	2.69234	0.172564	99.9999
SAVP	17	M	Santorini		Vourvolous	61.2	0.712	13.87	5.68	0.1548	0.81	3.06	4.66	2.33	0.1738	92.6507		66.0545	0.768478	14.9702	6.13055	0.167079	0.874251	3.30273	5.02964	2.51482	0.187586	99.9999
SAVP	17	M	Santorini		Vourvolous	63.54	0.6053	14.16	5.15	0.1435	0.6449	2.66	4.76	2.5	0.1289	94.2926		67.386	0.641938	15.0171	5.46172	0.152186	0.683935	2.82101	5.04812	2.65132	0.136702	100
SAVP	17	M	Santorini		Vourvolous	63.59	0.5873	14.06	5.38	0.1365	0.6989	2.91	4.77	2.44	0.1321	94.7049		67.1454	0.620137	14.8461	5.6808	0.144132	0.737977	3.0727	5.0367	2.57642	0.139486	99.9999
SAVP	2	T	Santorini	W-2	Middle Pumice	64.1	0.8	15.8	5.27		1.15	3.49	4.57	2.08		97.26		65.9058	0.822538	16.2451	5.41847	0	1.1824	3.58832	4.69875	2.1386		100
SAVP	2	M	Santorini	W-2	Middle Pumice	63.6	1.1	15.5	5.7		1.4	4	4.5	2.4		98.2		64.7658	1.12016	15.7841	5.80448	0	1.42566	4.07332	4.58248	2.44399		100
SAVP	3	M	Santorini	W-2	Middle Pumice	66.34	0.96	15.36	5.8	0.14	1.34	3.37	4.08	2.61		100		66.34	0.96	15.36	5.8	0.14	1.34	3.37	4.08	2.61		100
SAVP	3	M	Santorini	W-2	Middle Pumice	64.77	1.12	15.78	5.8	0	1.43	4.07	4.58	2.44		99.99		64.7765	1.12011	15.7816	5.80058	0	1.43014	4.07041	4.58046	2.44024		100
SAVP	4	T	Santorini	W-2	Middle Pumice	65.4	0.85	15.5	5.42	0.16	1.3	3.57	5.09	2.57	0.2	100.06		65.3608	0.84949	15.4907	5.41675	0.159904	1.29922	3.56786	5.08695	2.56846	0.19988	100					91	151	62	300	12		403	30	48
SAVP	4	T	Santorini	W-2	Middle Pumice	63.1	1.02	16	5.94	0.15	1.82	4.45	5.02	2.27	0.25	100.02		63.0874	1.0198	15.9968	5.93881	0.14997	1.81964	4.44911	5.019	2.26955	0.24995	100					84	168	56	264	11		393	29	59
SAVP	6	T	Santorini	W-2	Middle Pumice	62.4	1.07	15.9	6.45	0.15	1.98	4.85	4.87	2.13	0.25	100.05		62.3688	1.06947	15.8921	6.44678	0.149925	1.97901	4.84758	4.86757	2.12894	0.249875	100					83	174	52	250	11		388	21	51
SAVP	6	T	Santorini	W-2	Middle Pumice	62.4	1.05	15.9	6.43	0.17	2.03	4.79	4.82	2.12	0.25	99.96		62.425	1.05042	15.9064	6.43257	0.170068	2.03081	4.79192	4.82193	2.12085	0.2501	100					83	175	54	253	9		419	22	42
SAVP	6	T	Santorini	W-2	Middle Pumice	62.7	1.09	16	6.39	0.16	1.83	4.64	4.89	2.1	0.27	100.07		62.6561	1.08924	15.9888	6.38553	0.159888	1.82872	4.63675	4.88658	2.09853	0.269811	100					79	178	55	249	11		391	24	36
SAVP	6	T	Santorini	W-2	Middle Pumice	62.9	1.03	16.1	5.97	0.15	1.79	4.47	5.2	2.21	0.25	100.07		62.856	1.02928	16.0887	5.96582	0.149895	1.78875	4.46687	5.19636	2.20845	0.249825	100					85	171	53	257	12		400	27	46
SAVP	6	T	Santorini	W-2	Middle Pumice	62.9	1.04	15.7	6.2	0.16	1.71	4.3	5.48	2.27	0.23	99.99		62.9063	1.0401	15.7016	6.20062	0.160016	1.71017	4.30043	5.48055	2.27023	0.230023	100					82	166	52	262	11		391	21	49
SAVP	6	T	Santorini	W-2	Middle Pumice	62.9	1.03	15.9	6.22	0.14	1.87	4.42	5	2.27	0.24	99.99		62.9063	1.0301	15.9016	6.22062	0.140014	1.87019	4.42044	5.0005	2.27023	0.240024	100					83	170	56	266	10		379	32	41
SAVP	6	T	Santorini	W-2	Middle Pumice	63	1.04	16.1	5.99	0.15	1.7	4.34	5.23	2.22	0.27	100.04		62.9748	1.03958	16.0936	5.9876	0.14994	1.69932	4.33826	5.22791	2.21911	0.269892	100					87	173	54	272	10		423	21	52
SAVP	6	T	Santorini	W-2	Middle Pumice	63.1	1.01	16.1	5.9	0.15	1.77	4.29	5.23	2.21	0.26	100.02		63.0874	1.0098	16.0968	5.89882	0.14997	1.76965	4.28914	5.22895	2.20956	0.259948	100					83	165	54	261	9		408	26	47
SAVP	6	T	Santorini	W-2	Middle Pumice	63.1	1.02	16	5.94	0.15	1.82	4.45	5.02	2.27	0.25	100.02		63.0874	1.0198	15.9968	5.93881	0.14997	1.81964	4.44911	5.019	2.26955	0.24995	100					84	168	56	264	11		393	29	59
SAVP	6	T	Santorini	W-2	Middle Pumice	63.1	1.02	16.2	5.96	0.15	1.73	4.32	5.03	2.25	0.25	100.01		63.0937	1.0199	16.1984	5.9594	0.149985	1.72983	4.31957	5.0295	2.24978	0.249975	100					87	171	55	272	11		391	21	59
SAVP	6	T	Santorini	W-2	Middle Pumice	63.2	1.03	15.8	6.2	0.16	1.73	4.33	5.04	2.26	0.24	99.99		63.2063	1.0301	15.8016	6.20062	0.160016	1.73017	4.33043	5.0405	2.26023	0.240024	100					87	170	51	271	11		423	21	48
SAVP	6	T	Santorini	W-2	Middle Pumice	63.4	1	15.8	5.99	0.16	1.74	4.19	5.09	2.35	0.23	99.95		63.4317	1.0005	15.8079	5.993	0.16008	1.74087	4.1921	5.09255	2.35118	0.230115	100					85	168	56	271	11		289	24	42
SAVP	6	T	Santorini	W-2	Middle Pumice	63.5	1.01	15.6	5.99	0.18	1.79	4.41	5.06	2.26	0.26	100.06		63.4619	1.00939	15.5906	5.98641	0.179892	1.78893	4.40736	5.05697	2.25864	0.259844	100					71	168	55	250	10		325	20	62
SAVP	6	T	Santorini	W-2	Middle Pumice	63.7	1	15.8	6.05	0.18	1.62	4.33	4.75	2.29	0.25	99.97		63.7191	1.0003	15.8047	6.05182	0.180054	1.62049	4.3313	4.75143	2.29069	0.250075	100					75	163	55	245	9		338	23	48
SAVP	6	T	Santorini	W-2	Middle Pumice	63.7	0.97	15.8	6.05	0.17	1.65	4.34	4.81	2.29	0.26	100.04		63.6745	0.969612	15.7937	6.04758	0.169932	1.64934	4.33826	4.80808	2.28908	0.259896	100					74	165	54	247	11		355	17	47
SAVP	6	T	Santorini	W-2	Middle Pumice	63.9	1.01	15.9	5.48	0.16	1.78	4.44	4.81	2.3	0.26	100.04		63.8745	1.0096	15.8936	5.47781	0.159936	1.77929	4.43822	4.80808	2.29908	0.259896	100					80	164	51	254	11		354	18	63
SAVP	6	T	Santorini	W-2	Middle Pumice	64.9	0.86	15.6	5.59	0.16	1.38	3.69	5.09	2.55	0.21	100.03		64.8805	0.859742	15.5953	5.58832	0.159952	1.37959	3.68889	5.08847	2.54924	0.209937	100					94	154	58	283	12		437	21	51
SAVP	6	T	Santorini	W-2	Middle Pumice	65	0.88	15.6	5.56	0.17	1.35	3.65	5.04	2.52	0.22	99.99		65.0065	0.880088	15.6016	5.56056	0.170017	1.35014	3.65037	5.0405	2.52025	0.220022	100					93	153	59	290	11		426	29	48
SAVP	6	T	Santorini	W-2	Middle Pumice	65.4	0.85	15.5	5.42	0.16	1.3	3.57	5.09	2.57	0.2	100.06		65.3608	0.84949	15.4907	5.41675	0.159904	1.29922	3.56786	5.08695	2.56846	0.19988	100					91	151	62	300	12		403	30	48
SAVP	6	T	Santorini	W-2	Middle Pumice	65.4	0.85	15.6	5.39	0.15	1.22	3.53	5.1	2.61	0.2	100.05		65.3673	0.849575	15.5922	5.38731	0.149925	1.21939	3.52824	5.09745	2.6087	0.1999	100					93	150	59	298	11		410	28	46
SAVP	17	M	Santorini	W-2	Middle Pumice	59.53	0.8568	14.05	4.92	0.1739	1.2018	3.53	4.25	2.21	0.1877	90.9102		65.4822	0.942469	15.4548	5.41193	0.191288	1.32196	3.88295	4.67494	2.43097	0.206467	100			15.22	11.29	78.36	224.88	34.89	192.49	8.42	2.59	303.52	19.29	40.41	5	20.62	4.7	1.283	5.31	0.884	5.31	1.271
SAVP	17	M	Santorini	W-2	Middle Pumice	59.92	0.9186	13.96	5.02	0.1928	1.2299	3.29	4.76	2.36	0.1865	91.8379		65.2454	1.00024	15.2007	5.46615	0.209935	1.33921	3.5824	5.18305	2.56975	0.203075	99.9999			21.6	16.3	100.67	127.75	49.74	280.71	11.14	3.44	380.05	27.26	56.71	6.67	28.96	6.5	1.67	7.99	1.25	8.34	1.76
SAVP	17	M	Santorini	W-2	Middle Pumice	62.12	0.866	15.66	5.51	0.1729	1.28	4.42	4.82	2.22	0.2538	97.3227		63.8289	0.889823	16.0908	5.66158	0.177656	1.31521	4.54159	4.9526	2.28107	0.260782	100			18.8	14.41	89.29	167.42	39.93	223.63	10.18	2.87	323.38	21.95	46.29	5.56	23.46	5.76	1.486	5.84	1.071	6.72	1.428
SAVP	17	M	Santorini	W-2	Middle Pumice	62.97	0.9243	15	5.66	0.1182	1.2168	3.68	5.02	2.49	0.2471	97.3265		64.6997	0.94969	15.412	5.81548	0.121447	1.25022	3.78109	5.1579	2.5584	0.253888	99.9999
SAVP	17	M	Santorini	W-2	Middle Pumice	62.67	0.9322	14.83	6.1	0.175	1.328	3.59	4.89	2.45	0.255	97.2203		64.4618	0.958853	15.254	6.27441	0.180004	1.36597	3.69264	5.02981	2.52005	0.262291	99.9999
SAVP	17	M	Santorini	W-2	Middle Pumice	63.42	0.8979	15.83	5.38	0.1016	1.2746	4.1	4.92	2.36	0.2306	98.5148		64.3761	0.911437	16.0687	5.46111	0.103132	1.29382	4.16181	4.99417	2.39558	0.234077	99.9999
SAVP	17	M	Santorini	W-2	Middle Pumice	61.84	0.8865	14.39	5.63	0.169	1.3078	3.49	4.61	2.4	0.2185	94.9418		65.1346	0.93373	15.1567	5.92995	0.178004	1.37748	3.67594	4.85561	2.52786	0.230141	100
SAVP	17	M	Santorini	W-2	Middle Pumice	63.46	0.939	15	5.48	0.1033	1.2946	3.62	5	2.51	0.2361	97.6431		64.9918	0.961665	15.3621	5.61228	0.105793	1.32585	3.70738	5.12069	2.57059	0.241799	99.9999
SAVP	17	M	Santorini	W-2	Middle Pumice	64.1	0.9308	15.19	5.39	0.1803	1.2861	3.5	4.89	2.51	0.2373	98.2146		65.2652	0.947721	15.4661	5.48798	0.183578	1.30948	3.56362	4.97889	2.55563	0.241614	99.9999
SAVP	17	M	Santorini	W-2	Middle Pumice	63.49	0.9182	14.89	5.26	0.0663	1.2668	3.54	4.85	2.39	0.2686	96.94		65.4941	0.947184	15.36	5.42604	0.0683928	1.30679	3.65174	5.00309	2.46544	0.277079	99.9999
SAVP	17	M	Santorini	W-2	Middle Pumice	62.48	0.8142	16.63	4.91	0.1312	1.1042	4.59	4.9	1.99	0.205	97.7547		63.9151	0.832901	17.012	5.02278	0.134213	1.12956	4.69543	5.01255	2.03571	0.209709	99.9999
SAVP	17	M	Santorini	W-2	Middle Pumice	61.91	0.9418	14.31	5.47	0.1368	1.4645	3.48	4.67	2.46	0.1473	94.9905		65.1749	0.991468	15.0647	5.75847	0.144014	1.54173	3.66352	4.91628	2.58973	0.155068	99.9999
SAVP	17	M	Santorini	W-2	Middle Pumice	61.28	0.8702	14.25	5.17	0.1475	1.2822	3.32	4.47	2.45	0.2074	93.4473		65.5771	0.93122	15.2492	5.53253	0.157843	1.37211	3.5528	4.78344	2.6218	0.221943	100
SAVP	17	M	Santorini	W-2	Middle Pumice	62.54	0.8906	14.67	5.61	0.1205	1.3522	3.6	3.14	2.48	0.2078	94.6112		66.1021	0.941326	15.5056	5.92953	0.127363	1.42922	3.80505	3.31885	2.62125	0.219636	99.9999
SAVP	17	M	Santorini	W-2	Middle Pumice	62.49	0.9356	14.56	5.4	0.169	1.2244	3.55	4.65	2.47	0.2226	95.6717		65.3171	0.977928	15.2187	5.6443	0.176646	1.27979	3.71061	4.86037	2.58175	0.232671	99.9999
SAVP	17	M	Santorini	W-2	Middle Pumice	61.22	1.146	15.85	6.13	0.1339	2.08	4.75	4.77	2.1	0.276	98.456		62.1801	1.16397	16.0986	6.22613	0.136	2.11262	4.82449	4.8448	2.13293	0.280328	99.9999			22.34	17.75	111.08	157.5	51.11	294.53	12.76	3.67	405.4	27.59	59.35	7.01	30.05	7.05	1.466	7.59	1.235	8.53	2.13
SAVP	17	M	Santorini	W-2	Middle Pumice	64.13	0.8163	15.06	5.03	0.2287	1.0679	3.33	4.93	2.55	0.1967	97.3397		65.8827	0.83861	15.4716	5.16747	0.23495	1.09709	3.42101	5.06474	2.61969	0.202076	99.9999			18.76	13.11	100.56	188.34	43.23	262.29	11.19	3.2	368.11	23.98	52.22	6.3	25.56	6.06	1.386	6.46	1.028	7.31	1.571
SAVP	17	M	Santorini	W-2	Middle Pumice	63.93	0.8691	15.28	5.45	0.117	1.2946	3.73	4.85	2.4	0.2201	98.1409		65.141	0.885564	15.5695	5.55324	0.119216	1.31912	3.80066	4.94187	2.44546	0.224269	99.9999
SAVP	17	M	Santorini	W-2	Middle Pumice	63.73	0.8811	15.11	5.35	0.1874	1.2208	3.76	4.7	2.39	0.1925	97.5219		65.3494	0.903489	15.494	5.48595	0.192162	1.25182	3.85554	4.81943	2.45073	0.197392	99.9999
SAVP	17	M	Santorini	W-2	Middle Pumice	62.92	0.7552	15.07	5.1	0.1965	1.0378	3.46	4.87	2.5	0.1871	96.0967		65.4757	0.785875	15.6821	5.30715	0.204482	1.07995	3.60054	5.06781	2.60155	0.1947	99.9999
SAVP	17	M	Santorini	W-2	Middle Pumice	62.39	0.8763	15.4	5.86	0.2226	1.344	3.76	4.73	2.36	0.244	97.187		64.1958	0.901664	15.8457	6.02961	0.229043	1.3829	3.86883	4.86691	2.42831	0.251062	99.9999
SAVP	17	M	Santorini	W-2	Middle Pumice	60.43	0.6985	14.3	4.09	0.1293	0.8501	2.94	4.07	2.49	0.2006	90.1986		66.9966	0.774402	15.8539	4.53444	0.14335	0.942476	3.25947	4.51227	2.76057	0.222398	99.9999
SAVP	17	M	Santorini	W-2	Middle Pumice	62.92	0.8048	15.07	5.52	0.1108	1.1612	3.62	4.7	2.43	0.1618	96.4987		65.203	0.834001	15.6168	5.72028	0.11482	1.20333	3.75135	4.87053	2.51817	0.167671	99.9999
SAVP	17	M	Santorini	W-2	Middle Pumice	62.43	0.6939	14.92	4.65	0.1691	0.9441	3	4.76	2.6	0.1903	94.3575		66.1633	0.735395	15.8122	4.92807	0.179212	1.00056	3.1794	5.04464	2.75548	0.20168	99.9999
SAVP	17	M	Santorini	W-2	Middle Pumice	61.46	0.8222	14.83	4.74	0.184	1.0576	3.29	4.44	2.4	0.1744	93.3983		65.8042	0.880316	15.8782	5.07504	0.197006	1.13235	3.52255	4.75383	2.56964	0.186727	99.9999
SAVP	17	M	Santorini	W-2	Middle Pumice	61.83	1.0991	15.86	6.33	0.1862	1.74	4.42	4.82	2.22	0.2554	98.7608		62.6058	1.11289	16.059	6.40943	0.188536	1.76183	4.47546	4.88048	2.24786	0.258605	99.9999
SAVP	17	M	Santorini	W-2	Middle Pumice	60.74	1.069	15.73	6.09	0.2609	1.69	4.55	4.77	2.18	0.2507	97.3307		62.4058	1.09832	16.1614	6.25702	0.268055	1.73635	4.67478	4.90082	2.23979	0.257575	99.9999
SAVP	17	M	Santorini	W-2	Middle Pumice	63.19	0.7421	15	4.71	0.052	1.011	3.27	4.84	2.54	0.1555	95.5107		66.1601	0.776981	15.705	4.93138	0.0544442	1.05852	3.4237	5.0675	2.65939	0.162809	99.9999
SAVP	17	M	Santorini	W-2	Middle Pumice	63.85	0.7557	15.07	4.96	0.1784	1.0993	3.49	4.91	2.42	0.158	96.8914		65.8985	0.779945	15.5535	5.11913	0.184124	1.13457	3.60197	5.06753	2.49764	0.163069	100
SAVP	17	M	Santorini	W-2	Middle Pumice	61.57	1.0531	15.64	6.08	0.1032	1.3781	3.88	4.52	2.27	0.2572	96.7517		63.6371	1.08846	16.1651	6.28413	0.106665	1.42437	4.01027	4.67175	2.34621	0.265835	99.9999
SAVP	17	M	Santorini	W-2	Middle Pumice	60.98	1.1349	15.71	6.93	0.202	1.84	5.13	4.71	2	0.238	98.8749		61.6739	1.14781	15.8888	7.00886	0.204299	1.86094	5.18837	4.7636	2.02276	0.240708	100
SAVP	17	M	Santorini	W-2	Middle Pumice	62.42	1.0597	15.92	6.41	0.1443	1.75	4.81	4.95	1.99	0.2352	99.6892		62.6146	1.063	15.9696	6.42998	0.14475	1.75546	4.825	4.96543	1.9962	0.235933	100
SAVP	17	M	Santorini	W-2	Middle Pumice	64.85	0.6313	14.9	4.31	0.1109	0.7496	2.83	4.72	2.55	0.0861	95.738		67.7369	0.659404	15.5633	4.50187	0.115837	0.78297	2.95598	4.93012	2.66352	0.0899329	99.9999
SAVP	17	M	Santorini	W-2	Middle Pumice	63.73	0.7559	15	4.5	0.1223	0.9489	3.03	4.81	2.49	0.2227	95.6098		66.6563	0.790609	15.6888	4.70663	0.127916	0.992471	3.16913	5.03087	2.60434	0.232926	100
SAVP	17	M	Santorini	W-2	Middle Pumice	64.85	0.7958	15.38	4.93	0.1713	1.0808	3.62	4.95	2.42	0.2256	98.4236		65.8887	0.808546	15.6263	5.00896	0.174044	1.09811	3.67798	5.02928	2.45876	0.229213	99.9999
SAVP	17	M	Santorini	W-2	Middle Pumice	60.95	0.7636	14.51	5.18	0.1995	1.0313	3.2	4.69	2.38	0.185	93.0895		65.4746	0.820286	15.5872	5.56454	0.21431	1.10786	3.43755	5.03816	2.55668	0.198733	99.9999
SAVP	17	M	Santorini	W-2	Middle Pumice	63.82	0.6086	15.72	4.04	0.125	0.7441	3.63	4.76	2.41	0.0854	95.9432		66.5185	0.634334	16.3847	4.21082	0.130285	0.775563	3.78349	4.96127	2.5119	0.089011	99.9999
SAVP	17	M	Santorini	W-2	Middle Pumice	63	1.0129	15.42	6.12	0.1746	1.5369	4.28	4.82	2.16	0.269	98.7934		63.7694	1.02527	15.6083	6.19475	0.176732	1.55567	4.33227	4.87887	2.18638	0.272285	100
SAVP	17	M	Santorini	W-2	Middle Pumice	61.76	0.6856	14.37	4.8	0.0885	0.9574	3.07	4.66	2.42	0.1293	92.9409		66.4508	0.737673	15.4614	5.16457	0.0952218	1.03012	3.30317	5.01394	2.60381	0.139121	99.9999
SAVP	17	M	Santorini	W-2	Middle Pumice	62.95	0.7505	14.48	4.53	0.1234	1.0107	3	4.8	2.56	0.1691	94.3738		66.7028	0.795242	15.3432	4.80006	0.130757	1.07095	3.17885	5.08616	2.71262	0.179181	99.9999
SAVP	17	M	Santorini	W-2	Middle Pumice	62.99	0.7942	14.63	4.88	0.1289	1.1325	3.35	4.75	2.51	0.1814	95.347		66.064	0.832958	15.344	5.11815	0.13519	1.18777	3.51348	4.9818	2.63249	0.190252	100
SAVP	17	M	Santorini	W-2	Middle Pumice	61.94	0.7487	14.57	5.31	0.1118	1.2565	3.61	4.92	2.36	0.1673	94.9944		65.2038	0.788152	15.3377	5.5898	0.117691	1.32271	3.80022	5.17925	2.48436	0.176116	99.9999
SAVP	17	M	Santorini	W-2	Middle Pumice	62.68	0.7247	14.21	4.68	0.1219	0.8537	3.13	4.69	2.54	0.2014	93.8317		66.8005	0.77234	15.1441	4.98765	0.129913	0.90982	3.33576	4.99831	2.70697	0.21464	100
SAVP	17	M	Santorini	W-2	Middle Pumice	63.77	0.8785	15.28	5.42	0.2133	1.2942	4.12	5.01	2.37	0.2068	98.5629		64.6998	0.891309	15.5028	5.49903	0.21641	1.31307	4.18007	5.08305	2.40456	0.209815	99.9999
SAVP	17	M	Santorini	W-2	Middle Pumice	60.73	1.1278	15.64	6.58	0.1295	2.02	4.9	4.65	2.03	0.2837	98.091		61.9119	1.14975	15.9444	6.70806	0.13202	2.05931	4.99536	4.7405	2.06951	0.289221	100
SAVP	17	M	Santorini	W-2	Middle Pumice	61.74	0.8215	14.98	5.34	0.2344	1.2199	3.56	5.18	2.39	0.222	95.6879		64.5223	0.85852	15.6551	5.58064	0.244963	1.27487	3.72043	5.41343	2.4977	0.232004	99.9999
SAVP	17	M	Santorini	W-2	Middle Pumice	61.78	1.0948	15.75	6.1	0.1184	1.81	4.55	4.62	2.09	0.2889	98.2022		62.911	1.11484	16.0383	6.21167	0.120568	1.84314	4.6333	4.70458	2.12826	0.294189	99.9999			18.56	16.59	79.19	151.27	40.73	216.59	9.45	2.57	295.63	20.77	44.69	5.38	22.51	5.68	1.312	5.74	1.014	6.95	1.506
SAVP	17	M	Santorini	W-2	Middle Pumice	62.34	0.6314	14.06	3.96	0.1362	0.7858	2.77	4.36	2.55	0.1752	91.7686		67.9317	0.688035	15.3211	4.3152	0.148417	0.856284	3.01846	4.75108	2.77873	0.190915	100			17.91	17.1	81.45	152.78	39.78	220.26	9.56	2.74	304.85	21.15	44.47	5.38	23.9	5.57	1.394	6.1	1.028	6.72	1.546
SAVP	17	M	Santorini	W-2	Middle Pumice	64.31	0.6561	15.15	4.43	0.1504	0.8176	2.89	4.5	2.61	0.0946	95.6087		67.2638	0.686235	15.8458	4.63347	0.157308	0.855152	3.02274	4.70668	2.72988	0.098945	100			23.85	15.08	111.96	130.87	52.9	308.39	12.46	3.88	399.58	27.74	57.84	6.77	30.29	7.49	1.47	7.7	1.234	8.22	1.86
SAVP	17	M	Santorini	W-2	Middle Pumice	62.44	0.6468	14.46	4.42	0.2232	0.8037	2.79	4.56	2.56	0.1049	93.0086		67.1336	0.69542	15.5469	4.75225	0.239978	0.864114	2.99972	4.90277	2.75243	0.112785	100
SAVP	17	M	Santorini	W-2	Middle Pumice	63.73	0.6618	14.79	4.22	0.1436	0.75	2.86	4.44	2.61	0.1067	94.3121		67.5735	0.701713	15.682	4.47451	0.15226	0.795232	3.03248	4.70777	2.76741	0.113135	100
SAVP	17	M	Santorini	W-2	Middle Pumice	63.31	1.0426	15.65	6.04	0.1713	1.78	4.76	4.71	2.16	0.2071	99.8311		63.4171	1.04436	15.6765	6.05022	0.17159	1.78301	4.76805	4.71797	2.16365	0.20745	99.9999
SAVP	17	M	Santorini	W-2	Middle Pumice	63.88	0.9962	15.77	5.56	0.1427	1.4851	4.38	4.66	2.3	0.2089	99.3829		64.2767	1.00239	15.8679	5.59452	0.143586	1.49432	4.4072	4.68894	2.31428	0.210197	100
SAVP	17	M	Santorini	W-2	Middle Pumice	63.28	0.6257	14.42	4.32	0.1389	0.8261	2.78	4.47	2.61	0.1144	93.5852		67.6175	0.668589	15.4084	4.61611	0.148421	0.882725	2.97056	4.7764	2.7889	0.122242	99.9999
SAVP	17	M	Santorini	W-2	Middle Pumice	61.12	0.606	13.83	4.25	0.1949	0.84	2.9	4.24	2.48	0.1536	90.6146		67.4505	0.668766	15.2624	4.69019	0.215087	0.927003	3.20037	4.67916	2.73687	0.169509	99.9999
SAVP	17	M	Santorini	W-2	Middle Pumice	61.98	1.0455	15.3	6.14	0.2102	1.77	4.52	4.76	2.17	0.2528	98.1486		63.1491	1.06522	15.5886	6.25582	0.214165	1.80339	4.60526	4.84979	2.21093	0.257569	99.9999
SAVP	17	M	Santorini	W-2	Middle Pumice	62.34	1.0917	15.83	6.02	0.2383	1.83	4.83	4.56	2.05	0.325	99.1151		62.8966	1.10145	15.9713	6.07375	0.240428	1.84634	4.87312	4.60071	2.0683	0.327902	99.9999
SAVP	17	M	Santorini	W-2	Middle Pumice	63.63	1.0401	15.98	6.03	0.1031	1.5318	4.22	4.81	2.24	0.2408	99.8259		63.741	1.04191	16.0079	6.04052	0.10328	1.53447	4.22736	4.81839	2.24391	0.24122	99.9999
SAVP	17	M	Santorini	W-2	Middle Pumice	64.94	0.6628	14.96	4.7	0.1539	0.7567	3.13	4.91	2.57	0.1582	96.9417		66.9887	0.68371	15.432	4.84827	0.158755	0.780572	3.22874	5.0649	2.65108	0.163191	99.9999
SAVP	17	M	Santorini	W-2	Middle Pumice	62.68	1.0784	16.18	6	0.3075	1.87	4.87	4.63	2.04	0.2125	99.8685		62.7625	1.07982	16.2013	6.0079	0.307905	1.87246	4.87641	4.6361	2.04269	0.21278	99.9999
SAVP	17	M	Santorini	W-2	Middle Pumice	63.83	0.9371	16.12	5.89	0.1886	1.4261	4.64	5.01	2.08	0.1721	100.294		63.643	0.934355	16.0728	5.87275	0.188048	1.42192	4.62641	4.99532	2.07391	0.171596	100
SAVP	17	M	Santorini	W-2	Middle Pumice	61.7	1.0665	15.74	6.22	0.1191	1.7	4.4	4.46	2.06	0.2548	97.7205		63.1393	1.09138	16.1072	6.36509	0.121878	1.73966	4.50264	4.56404	2.10805	0.260744	99.9999
SAVP	17	M	Santorini	W-2	Middle Pumice	61.33	1.0378	15.37	5.7	0.1288	1.74	4.51	4.69	2.05	0.2533	96.81		63.3509	1.072	15.8765	5.88782	0.133044	1.79733	4.65861	4.84454	2.11755	0.261647	99.9999
SAVP	17	M	Santorini	W-2	Middle Pumice	62.82	0.6394	14.87	4.5	0.167	0.8001	2.85	4.47	2.54	0.145	93.8016		66.9711	0.681651	15.8526	4.79736	0.178035	0.852971	3.03833	4.76538	2.70784	0.154582	99.9999
SAVP	17	M	Santorini	W-2	Middle Pumice	64.09	0.6192	14.84	4.71	0.2154	0.7994	3.1	4.9	2.54	0.167	95.981		66.7736	0.645128	15.4614	4.90722	0.224419	0.832873	3.22981	5.10518	2.64636	0.173993	100
SAVP	17	M	Santorini	W-2	Middle Pumice	62.54	1.1357	16.14	6.51	0.1796	1.95	4.88	4.64	2.05	0.2498	100.275		62.3685	1.13259	16.0957	6.49215	0.179107	1.94465	4.86662	4.62727	2.04438	0.249115	100
SAVP	17	M	Santorini	W-2	Middle Pumice	61.07	0.879	15.07	5.18	0.1785	1.317	3.73	4.6	2.3	0.2018	94.5264		64.6063	0.929899	15.9426	5.47995	0.188836	1.39326	3.94599	4.86637	2.43318	0.213485	99.9999
SAVP	17	M	Santorini	W-2	Middle Pumice	63.22	0.7119	14.51	4.25	0.1329	0.8204	2.85	4.66	2.52	0.1188	93.794		67.403	0.759004	15.4701	4.53121	0.141693	0.874683	3.03857	4.96833	2.68674	0.126661	100
SAVP	17	M	Santorini	W-2	Middle Pumice	64.21	0.6494	14.58	4.38	0.1572	0.6989	2.76	4.73	2.68	0.1692	95.0148		67.5789	0.683472	15.345	4.60981	0.165448	0.73557	2.90481	4.97817	2.82061	0.178078	99.9999
SAVP	17	M	Santorini	W-2	Middle Pumice	63.54	0.6429	14.49	4.64	0.1119	0.8516	2.98	5.08	2.54	0.0991	94.9756		66.9014	0.676911	15.2566	4.88547	0.11782	0.896651	3.13765	5.34874	2.67437	0.104343	99.9999
SAVP	17	M	Santorini	W-2	Middle Pumice	62.74	0.6459	14.31	4.64	0.184	0.8539	2.9	4.85	2.52	0.122	93.7658		66.9114	0.688844	15.2614	4.9485	0.196234	0.910673	3.09281	5.17246	2.68755	0.130111	100
SAVP	17	M	Santorini	W-2	Middle Pumice	64.73	0.654	15.05	4.68	0.1326	0.808	2.84	4.85	2.61	0.0944	96.4491		67.1131	0.678078	15.6041	4.8523	0.137482	0.837748	2.94456	5.02856	2.70609	0.0978755	99.9999
SAVP	4	T	Santorini		Cape Thera	62.9	1.07	15.5	6.64	0.14	1.93	4.77	4.41	2.33	0.24	99.93		62.9441	1.07075	15.5109	6.64465	0.140098	1.93135	4.77334	4.41309	2.33163	0.240168	100					78	161	45	234	12		387	35	63
SAVP	6	T	Santorini		Cape Thera	61.1	1.16	15.6	7.47	0.16	2.47	5.56	4.16	2.06	0.23	99.97		61.1183	1.16035	15.6047	7.47224	0.160048	2.47074	5.56167	4.16125	2.06062	0.230069	100					69	172	44	210	10		373	25	50
SAVP	6	T	Santorini		Cape Thera	61.2	1.16	15.6	7.15	0.17	2.44	5.29	4.77	2	0.2	99.98		61.2122	1.16023	15.6031	7.15143	0.170034	2.44049	5.29106	4.77095	2.0004	0.20004	100					68	177	42	205	10		378	21	66
SAVP	6	T	Santorini		Cape Thera	61.3	1.18	15.8	7.2	0.16	2.43	5.29	4.49	1.96	0.22	100.03		61.2816	1.17965	15.7953	7.19784	0.159952	2.42927	5.28841	4.48865	1.95941	0.219934	100					70	174	43	208	10		365	19	44
SAVP	6	T	Santorini		Cape Thera	61.4	1.13	15.7	7.25	0.17	2.3	5.38	4.4	2.02	0.22	99.97		61.4184	1.13034	15.7047	7.25218	0.170051	2.30069	5.38161	4.40132	2.02061	0.220066	100					72	174	44	219	9		349	28	61
SAVP	6	T	Santorini		Cape Thera	61.7	1.15	15.7	7.12	0.15	2.29	5.18	4.42	2.03	0.2	99.94		61.737	1.15069	15.7094	7.12427	0.15009	2.29137	5.18311	4.42265	2.03122	0.20012	100					71	170	43	210	10		407	22	55
SAVP	6	T	Santorini		Cape Thera	61.7	1.14	15.8	7.16	0.16	2.23	5.25	4.2	2.12	0.22	99.98		61.7123	1.14023	15.8032	7.16143	0.160032	2.23045	5.25105	4.20084	2.12042	0.220044	100					69	172	45	220	10		356	26	47
SAVP	6	T	Santorini		Cape Thera	61.8	1.13	15.8	7.2	0.15	2.21	5.11	4.32	2.13	0.23	100.08		61.7506	1.1291	15.7874	7.19424	0.14988	2.20823	5.10592	4.31655	2.1283	0.229816	100					72	167	45	224	11		388	33	52
SAVP	6	T	Santorini		Cape Thera	61.8	1.13	15.7	7.17	0.17	2.24	5.19	4.2	2.16	0.25	100.01		61.7938	1.12989	15.6984	7.16928	0.169983	2.23978	5.18948	4.19958	2.15978	0.249975	100					72	169	44	216	10		373	27	66
SAVP	6	T	Santorini		Cape Thera	62.3	1.1	15.6	6.85	0.17	2.18	4.94	4.41	2.23	0.23	100.01		62.2938	1.09989	15.5984	6.84932	0.169983	2.17978	4.93951	4.40956	2.22978	0.229977	100					76	163	47	230	12		379	27	65
SAVP	6	T	Santorini		Cape Thera	62.6	1.04	15.5	6.36	0.16	2.22	4.29	5.06	2.58	0.24	100.05		62.5687	1.03948	15.4923	6.35682	0.15992	2.21889	4.28786	5.05747	2.57871	0.23988	100					72	153	51	239	11		315	22	58
SAVP	6	T	Santorini		Cape Thera	62.7	1.13	15.6	7.02	0.16	2.16	5.02	3.97	2.17	0.23	100.16		62.5998	1.12819	15.5751	7.00879	0.159744	2.15655	5.01198	3.96366	2.16653	0.229633	100					74	166	44	228	11		381	26	66
SAVP	6	T	Santorini		Cape Thera	62.8	1.04	15.7	6.45	0.16	2	4.63	4.81	2.24	0.21	100.04		62.7749	1.03958	15.6937	6.44742	0.159936	1.9992	4.62815	4.80808	2.2391	0.209916	100					80	164	43	230	12		401	27	53
SAVP	6	T	Santorini		Cape Thera	62.8	1.07	15.6	6.64	0.17	2	4.76	4.43	2.28	0.22	99.97		62.8188	1.07032	15.6047	6.64199	0.170051	2.0006	4.76143	4.43133	2.28068	0.220066	100					77	160	45	234	11		391	34	39
SAVP	6	T	Santorini		Cape Thera	63	1.07	15.5	6.64	0.14	1.93	4.77	4.41	2.33	0.24	100.03		62.9811	1.06968	15.4954	6.63801	0.139958	1.92942	4.76857	4.40868	2.3293	0.239928	100					78	161	45	234	12		387	35	63
SAVP	6	T	Santorini		Cape Thera	63	1.08	15.8	6.03	0.17	2.09	4.83	4.54	2.19	0.23	99.96		63.0252	1.08043	15.8063	6.03241	0.170068	2.09084	4.83193	4.54182	2.19088	0.230092	100					73	160	47	233	11		368	27	68
SAVP	6	T	Santorini		Cape Thera	63.1	1.07	15.5	6.6	0.16	1.92	4.69	4.45	2.27	0.24	100		63.1	1.07	15.5	6.6	0.16	1.92	4.69	4.45	2.27	0.24	100					78	158	48	241	11		384	22	61
SAVP	6	T	Santorini		Cape Thera	63.1	1.07	15.5	6.53	0.14	1.94	4.65	4.52	2.32	0.25	100.02		63.0874	1.06979	15.4969	6.52869	0.139972	1.93961	4.64907	4.5191	2.31954	0.24995	100					77	159	46	237	10		401	21	57
SAVP	6	T	Santorini		Cape Thera	63.5	1.05	15.4	6.47	0.16	1.95	4.58	4.72	1.91	0.24	99.98		63.5127	1.05021	15.4031	6.47129	0.160032	1.95039	4.58092	4.72094	1.91038	0.240048	100					74	156	49	245	10		406	33	54
SAVP	17	M	Santorini		Cape Thera	61.91	0.80676	16.07	5.62	0.1238	1.2781	4.76	4.92	2.05	0.1863	97.725		63.3513	0.825541	16.4441	5.75083	0.126682	1.30785	4.87081	5.03454	2.09772	0.190637	100			25.19	22.63	130.34	169.65	54	322.01	14.73	4.3	504.67	34.72	70.76	8.27	33.6	8.1	1.94	8.53	1.453	8.74	1.99
SAVP	17	M	Santorini		Cape Thera	62.98	0.94716	14.82	5.72	0.149	1.3679	3.8	4.57	2.43	0.2118	96.9959		64.9306	0.976495	15.279	5.89716	0.153615	1.41027	3.91769	4.71154	2.50526	0.21836	100			17.9	19.38	106.89	131.74	45.5	264.03	13.66	3.4	419.91	27.35	60.04	6.9	28.45	6.56	1.83	7.49	1.126	6.97	1.52
SAVP	17	M	Santorini		Cape Thera	63.18	0.890424	14.76	5.8	0.2101	1.2401	3.76	4.68	2.48	0.1764	97.177		65.0154	0.916291	15.1888	5.96849	0.216203	1.27612	3.86923	4.81595	2.55204	0.181524	100			19.46	15.84	94.23	140.89	38.82	226.29	11.43	3.03	386.75	24.51	53.9	6.09	25.25	5.6	1.44	6.46	0.935	6.44	1.473
SAVP	17	M	Santorini		Cape Thera	62.93	0.93744	14.62	5.88	0.1705	1.367	3.62	4.84	2.44	0.2051	97.01		64.8696	0.966333	15.0706	6.06123	0.175755	1.40913	3.73157	4.98917	2.5152	0.211421	100
SAVP	17	M	Santorini		Cape Thera	62.98	0.90036	14.82	5.88	0.2678	1.3413	3.64	4.79	2.4	0.1528	97.1723		64.8127	0.926561	15.2513	6.05111	0.275593	1.38033	3.74593	4.92939	2.46984	0.157247	100
SAVP	17	M	Santorini		Cape Thera	62.35	0.893016	14.54	5.96	0.1511	1.4405	3.83	4.65	2.43	0.2314	96.476		64.6275	0.925635	15.0711	6.1777	0.156619	1.49312	3.9699	4.81985	2.51876	0.239852	100
SAVP	17	M	Santorini		Cape Thera	63.23	0.904608	14.85	5.33	0.1707	1.3341	3.68	4.87	2.42	0.2157	97.0051		65.1821	0.932536	15.3085	5.49456	0.17597	1.37529	3.79361	5.02035	2.49471	0.222359	100
SAVP	17	M	Santorini		Cape Thera	64	0.915192	14.66	5.91	0.2246	1.5164	3.89	4.95	2.46	0.1886	98.7148		64.8332	0.927107	14.8509	5.98694	0.227524	1.53614	3.94065	5.01445	2.49203	0.191055	100
SAVP	17	M	Santorini		Cape Thera	63.08	0.920952	14.79	5.94	0.1713	1.288	3.57	4.59	2.46	0.192	97.0023		65.0294	0.949413	15.2471	6.12357	0.176594	1.3278	3.68033	4.73185	2.53602	0.197934	100
SAVP	17	M	Santorini		Cape Thera	62.97	0.907704	14.62	6.03	0.1667	1.2967	3.76	4.94	2.5	0.2534	97.4445		64.6214	0.931509	15.0034	6.18814	0.171072	1.33071	3.85861	5.06955	2.56556	0.260045	100
SAVP	17	M	Santorini		Cape Thera	62.63	0.861552	15.23	5.33	0.1649	1.542	4.08	5.13	2.19	0.1075	97.266		64.3905	0.885769	15.6581	5.47982	0.169535	1.58534	4.19468	5.2742	2.25156	0.110522	100
SAVP	17	M	Santorini		Cape Thera	62.69	0.89388	14.64	5.75	0.0728	1.2671	3.66	4.57	2.4	0.2489	96.1927		65.1713	0.92926	15.2195	5.97759	0.0756814	1.31725	3.80486	4.75088	2.49499	0.258751	100
SAVP	17	M	Santorini		Cape Thera	66.42	0.576936	14.42	4.02	0.1566	0.737	2.45	5.28	2.8	0.1127	96.9732		68.4931	0.594944	14.8701	4.14547	0.161488	0.760004	2.52647	5.4448	2.88739	0.116218	100			14.84	12.57	130.55	115.37	52.7	330.19	13.89	3.86	465.78	30.12	67.95	7.84	29.15	8.14	1.92	6.12	1.2	6.71	2.06
SAVP	17	M	Santorini		Cape Thera	62.38	0.671976	13.83	4.4	0.0881	0.7885	2.65	4.89	2.64	0.1449	92.4835		67.4499	0.72659	14.954	4.75761	0.0952603	0.852585	2.86538	5.28743	2.85456	0.156677	100			19.98	15.55	123.52	119.73	50.12	301.59	13.93	3.55	464.58	30.89	65.11	7.58	28.17	7.42	1.33	7.3	1.242	7.96	1.81
SAVP	17	M	Santorini		Cape Thera	64.44	0.940824	14.16	4.55	0.1511	0.9434	2.7	4.5	3.07	0.221	95.6763		67.3521	0.98334	14.7999	4.75562	0.157928	0.986033	2.82201	4.70336	3.20874	0.230987	100			16.46	16.42	123.01	115.43	46.96	297.06	15.33	3.69	470.24	30.87	69.68	7.99	30.44	7.13	1.59	7.79	1.192	7.48	1.861
SAVP	17	M	Santorini		Cape Thera	64.25	0.703008	14.74	4.77	0.1253	0.9975	3.86	4.95	2.43	0.1412	96.967		66.2596	0.724997	15.201	4.9192	0.129219	1.0287	3.98074	5.10483	2.50601	0.145617	100
SAVP	17	M	Santorini		Cape Thera	59.41	0.723888	13.46	4.33	0.1263	0.8354	2.62	4.33	2.53	0.1221	88.4877		67.1393	0.818066	15.2112	4.89334	0.142732	0.944086	2.96086	4.89334	2.85915	0.137985	100
SAVP	17	M	Santorini		Cape Thera	63.38	0.723326	14.122	4.414	0.12948	0.86036	2.856	4.79	2.694	0.14838	94.1175		67.3413	0.768535	15.0046	4.68988	0.137573	0.914133	3.0345	5.08938	2.86238	0.157654	100			18.43	19.94	102.83	162.01	47.07	271.71	13.45	3.23	447.95	30	63.42	7.13	29.1	6.92	2.14	7.63	1.58	8.32	2.13
SAVP	17	M	Santorini		Cape Thera	2.64022	0.133964	0.498919	0.277363	0.0271238	0.10806	0.569061	0.377955	0.251058	0.042723	3.64245		72.4847	3.67786	13.6974	7.61473	0.74466	2.96668	15.623	10.3764	6.89256	1.17292	135.251
SAVP	17	M	Santorini		Cape Thera	59.28	1.02067	14.65	6.61	0.1574	1.76	4.18	4.7	2.1	0.2159	94.674		62.6149	1.07809	15.4742	6.98186	0.166255	1.85901	4.41515	4.96441	2.21814	0.228046	100
SAVP	17	M	Santorini		Cape Thera	61.52	1.05775	15.08	6.55	0.2113	1.71	4.45	4.74	2.21	0.2494	97.7785		62.9177	1.08178	15.4226	6.69882	0.216101	1.74885	4.5511	4.84769	2.26021	0.255066	100
SAVP	17	M	Santorini		Cape Thera	61.69	1.08922	15.37	6.4	0.1963	1.81	4.85	4.92	2.12	0.1774	98.6229		62.5514	1.10442	15.5846	6.48936	0.199041	1.83527	4.91772	4.9887	2.1496	0.179877	100
SAVP	17	M	Santorini		Cape Thera	61.22	1.0607	15.3	6.3	0.1747	1.78	4.76	5.1	2.19	0.2309	98.1163		62.3953	1.08107	15.5937	6.42095	0.178054	1.81417	4.85139	5.19791	2.23204	0.235333	100
SAVP	17	M	Santorini		Cape Thera	61.91	0.99072	15.24	5.85	0.1427	1.4934	4.04	4.87	2.31	0.1836	97.0304		63.8047	1.02104	15.7064	6.02904	0.147067	1.5391	4.16364	5.01904	2.3807	0.189219	100
SAVP	17	M	Santorini		Cape Thera	62.85	0.998064	15.47	6.38	0.1237	1.7	4.7	5.15	2.27	0.2568	99.8986		62.9138	0.999077	15.4857	6.38648	0.123826	1.70173	4.70477	5.15523	2.2723	0.257061	100
SAVP	17	M	Santorini		Cape Thera	62.02	1.08878	15.29	6.86	0.2326	1.67	4.8	4.92	2.14	0.2076	99.229		62.5019	1.09724	15.4088	6.9133	0.234407	1.68298	4.8373	4.95823	2.15663	0.209213	100
SAVP	17	M	Santorini		Cape Thera	62.41	0.983448	15.6	6.46	0.1843	1.652	4.66	5.07	2.26	0.1996	99.4793		62.7366	0.988595	15.6816	6.49381	0.185265	1.66065	4.68439	5.09654	2.27183	0.200645	100
SAVP	17	M	Santorini		Cape Thera	61.72	1.0512	15.27	6.92	0.2459	1.8	4.6	4.79	2.16	0.2072	98.7643		62.4922	1.06435	15.4611	7.00658	0.248977	1.82252	4.65755	4.84993	2.18703	0.209792	100
SAVP	17	M	Santorini		Cape Thera	63.24	0.830016	14.95	4.8	0.1961	1.034	3.62	4.95	2.38	0.1452	96.1453		65.7754	0.863293	15.5494	4.99244	0.203962	1.07546	3.76513	5.14846	2.47542	0.151021	100
SAVP	1		Santorini	V-1	Lower Pumice 2	68	0.31	14.15	3	0.07	0.38	1.54	5	3.3	0	95.75		71.0183	0.32376	14.7781	3.13316	0.073107	0.396867	1.60836	5.22193	3.44648	0	100
SAVP	2	T	Santorini	V-1	Lower Pumice 2	71.5	0.26	15	2.34		0.28	1.39	3.68	3		97.45		73.371	0.266803	15.3925	2.40123	0	0.287327	1.42637	3.7763	3.0785		100
SAVP	3	M	Santorini	V-1	Lower Pumice 2	73.91	0.19	14.1	2.46	0.05	0.17	1.05	4.47	3.6		100		73.91	0.19	14.1	2.46	0.05	0.17	1.05	4.47	3.6		100
SAVP	3	M	Santorini	V-1	Lower Pumice 2	72.7	0.22	15.16	2.49	0	0.37	1.31	4.37	3.38		100		72.7	0.22	15.16	2.49	0	0.37	1.31	4.37	3.38		100
SAVP	3	M	Santorini	V-1	Lower Pumice 2	72.58	0.27	15.22	2.16	0	0.3	1.31	4.41	3.76		100.01		72.5727	0.269973	15.2185	2.15978	0	0.29997	1.30987	4.40956	3.75962		100
SAVP	3	M	Santorini	V-1	Lower Pumice 2	72.1	0.28	15.12	2.53	0	0.46	1.51	4.63	3.39		100.02		72.0856	0.279944	15.117	2.52949	0	0.459908	1.5097	4.62907	3.38932		100
SAVP	4	T	Santorini	V-1	Lower Pumice 2	69.4	0.47	15	3.25	0.11	0.65	2	5.56	3.47	0.09	100		69.4	0.47	15	3.25	0.11	0.65	2	5.56	3.47	0.09	100					105	99	56	322	0		498	30	51
SAVP	4	T	Santorini	V-1	Lower Pumice 2	55.7	1.1	17.5	7.75	0.18	4.03	8.25	4.1	1.14	0.27	100.02		55.6889	1.09978	17.4965	7.74845	0.179964	4.02919	8.24835	4.09918	1.13977	0.269946	100					29	244	31	119	6		267	16	18
SAVP	6	T	Santorini	V-1	Lower Pumice 2	47.4	0.3	17.7	6.54	0.15	11.29	15.35	1.1	0.1	0.03	99.96		47.419	0.30012	17.7071	6.54262	0.15006	11.2945	15.3561	1.10044	0.10004	0.030012	100					1	200	9	35	70		48		0
SAVP	6	T	Santorini	V-1	Lower Pumice 2	48.3	0.45	19.6	5.9	0.12	8.07	15.25	1.58	0.17	0.04	99.48		48.5525	0.452352	19.7025	5.93084	0.120627	8.11218	15.3297	1.58826	0.170889	0.0402091	100					7	238	14	42	35		84		0
SAVP	6	T	Santorini	V-1	Lower Pumice 2	51.8	0.83	18.3	7.78	0.18	6.54	11.05	2.82	0.62	0.17	100.09		51.7534	0.829254	18.2835	7.773	0.179838	6.53412	11.0401	2.81746	0.619443	0.169847	100					16	256	26	68	5		133	3	19
SAVP	6	T	Santorini	V-1	Lower Pumice 2	54.7	1.11	18.5	7.9	0.17	3.73	9.12	3.54	0.98	0.22	99.97		54.7164	1.11033	18.5056	7.90237	0.170051	3.73112	9.12274	3.54106	0.980294	0.220066	100					32	268	29	112	17		247	10	40
SAVP	6	T	Santorini	V-1	Lower Pumice 2	54.9	1.12	17.1	8.38	0.17	4.31	8.82	4.04	0.97	0.24	100.05		54.8726	1.11944	17.0915	8.37581	0.169915	4.30785	8.81559	4.03798	0.969515	0.23988	100					26	260	27	96	4		199	11
SAVP	6	T	Santorini	V-1	Lower Pumice 2	55	1.07	17.2	7.17	0.17	4.71	8.68	3.98	0.98	0.24	99.2		55.4435	1.07863	17.3387	7.22782	0.171371	4.74798	8.75	4.0121	0.987903	0.241935	100					26	239	31	104	6		242	9	39
SAVP	6	T	Santorini	V-1	Lower Pumice 2	55.1	1.07	18.4	7.86	0.18	3.66	8.96	3.47	1.08	0.22	100		55.1	1.07	18.4	7.86	0.18	3.66	8.96	3.47	1.08	0.22	100					35	258	33	117	16		250	21	21
SAVP	6	T	Santorini	V-1	Lower Pumice 2	55.5	1.06	18.1	7.87	0.15	3.6	8.78	3.62	0.15	0.18	99.01		56.0549	1.0706	18.281	7.94869	0.1515	3.636	8.86779	3.6562	0.1515	0.1818	100					37	251	30	113			243	13
SAVP	6	T	Santorini	V-1	Lower Pumice 2	55.7	1.1	17.5	7.76	0.18	4.03	8.25	4.1	1.14	0.27	100.03		55.6833	1.09967	17.4948	7.75767	0.179946	4.02879	8.24753	4.09877	1.13966	0.269919	100					29	244	31	119	15		267	16	18
SAVP	6	T	Santorini	V-1	Lower Pumice 2	63	0.71	16	5.09	0.17	2.22	5.03	5.67	1.95	0.21	100.05		62.9685	0.709645	15.992	5.08746	0.169915	2.21889	5.02749	5.66717	1.94903	0.209895	100					67	166	45	217	16		390	23	30
SAVP	6	T	Santorini	V-1	Lower Pumice 2	63.1	0.72	16	5.21	0.15	2.21	5.23	5.04	2.14	0.18	99.98		63.1126	0.720144	16.0032	5.21104	0.15003	2.21044	5.23105	5.04101	2.14043	0.180036	100					65	157	44	226	11		385	25	54
SAVP	6	T	Santorini	V-1	Lower Pumice 2	63.9	0.71	16.1	5.05	0.14	2.09	4.52	5.13	2.29	0.15	100.08		63.8489	0.709432	16.0871	5.04596	0.139888	2.08833	4.51639	5.1259	2.28817	0.14988	100					74	151	45	234	10		407	22	42
SAVP	6	T	Santorini	V-1	Lower Pumice 2	66.3	0.59	15.6	4.25	0.11	1.48	3.68	5.01	2.78	0.13	99.93		66.3464	0.590413	15.6109	4.25298	0.110077	1.48104	3.68258	5.01351	2.78195	0.130091	100					93	124	51	287	12		460	29	57
SAVP	6	T	Santorini	V-1	Lower Pumice 2	67.5	0.5	15.2	3.75	0.14	1.26	3.03	5.67	2.83	0.12	100		67.5	0.5	15.2	3.75	0.14	1.26	3.03	5.67	2.83	0.12	100					91	113	52	284	11		467	23	34
SAVP	6	T	Santorini	V-1	Lower Pumice 2	67.5	0.57	15.2	3.97	0.13	1.19	2.84	5.52	2.97	0.12	100.01		67.4933	0.569943	15.1985	3.9696	0.129987	1.18988	2.83972	5.51945	2.9697	0.119988	100					93	123	51	268	11		408	32	59
SAVP	6	T	Santorini	V-1	Lower Pumice 2	67.5	0.54	15.2	3.72	0.13	1.13	3.9	4.79	2.92	0.16	99.99		67.5068	0.540054	15.2015	3.72037	0.130013	1.13011	3.90039	4.79048	2.92029	0.160016	100					79	126	58	272	12		451	26	49
SAVP	6	T	Santorini	V-1	Lower Pumice 2	67.6	0.53	15.7	3.85	0.1	1.22	2.97	4.88	3.06	0.1	100.01		67.5932	0.529947	15.6984	3.84962	0.09999	1.21988	2.9697	4.87951	3.05969	0.09999	100					99	114	49	298	12		489	23	44
SAVP	6	T	Santorini	V-1	Lower Pumice 2	68.1	0.53	15.3	3.53	0.14	0.84	2.72	5.75	2.96	0.12	99.99		68.1068	0.530053	15.3015	3.53035	0.140014	0.840084	2.72027	5.75058	2.9603	0.120012	100					90	113	53	281	9		477	26	44
SAVP	6	T	Santorini	V-1	Lower Pumice 2	68.3	0.48	15	3.26	0.1	0.9	2.18	6.54	3.17	0.11	100.04		68.2727	0.479808	14.994	3.2587	0.09996	0.89964	2.17913	6.53739	3.16873	0.109956	100					96	116	55	297	3		460	43	38
SAVP	6	T	Santorini	V-1	Lower Pumice 2	68.3	0.52	15.1	3.24	0.13	0.95	3.5	4.76	2.99	0.16	99.65		68.5399	0.521826	15.153	3.25138	0.130457	0.953337	3.51229	4.77672	3.0005	0.160562	100					88	110	52	276	12		432	33	70
SAVP	6	T	Santorini	V-1	Lower Pumice 2	68.6	0.51	14.9	3.77	0.12	0.94	2.58	5.18	3.39	0.1	100.09		68.5383	0.509541	14.8866	3.76661	0.119892	0.939155	2.57768	5.17534	3.38695	0.0999101	100					99	106	52	294	11		424	28	47
SAVP	6	T	Santorini	V-1	Lower Pumice 2	68.7	0.46	14.9	3.04	0.11	0.66	2.53	6.06	3.44	0.11	100.01		68.6931	0.459954	14.8985	3.0397	0.109989	0.659934	2.52975	6.05939	3.43966	0.109989	100					111	93	57	331	11		529	30	56
SAVP	6	T	Santorini	V-1	Lower Pumice 2	69	0.44	14.9	3.01	0.11	0.71	1.84	6.54	3.39	0.09	100.03		68.9793	0.439868	14.8955	3.0091	0.109967	0.709787	1.83945	6.53804	3.38898	0.089973	100					106	92	57	334	14		444	22	40
SAVP	6	T	Santorini	V-1	Lower Pumice 2	69	0.46	15	3.16	0.11	0.67	2.05	6.11	3.34	0.09	99.99		69.0069	0.460046	15.0015	3.16032	0.110011	0.670067	2.05021	6.11061	3.34033	0.090009	100					102	103	57	305	11		482	45	39
SAVP	6	T	Santorini	V-1	Lower Pumice 2	69.2	0.46	14.6	2.98	0.12	1.05	1.92	5.88	3.4	0.09	99.7		69.4082	0.461384	14.6439	2.98897	0.120361	1.05316	1.92578	5.89769	3.41023	0.0902708	100					94	89	52	304	12		455	26	63
SAVP	6	T	Santorini	V-1	Lower Pumice 2	69.3	0.49	15	3.34	0.12	0.62	2.01	5.58	3.44	0.1	100		69.3	0.49	15	3.34	0.12	0.62	2.01	5.58	3.44	0.1	100					101	102	58	325	12		514	29	51
SAVP	6	T	Santorini	V-1	Lower Pumice 2	69.3	0.51	15.3	3.22	0.13	0.91	2.26	4.66	3.2	0.12	99.61		69.5713	0.511997	15.3599	3.23261	0.130509	0.913563	2.26885	4.67825	3.21253	0.12047	100					89	108	52	285	12		463	27	69
SAVP	6	T	Santorini	V-1	Lower Pumice 2	69.4	0.47	15	3.25	0.11	0.65	2	5.56	3.47	0.09	100		69.4	0.47	15	3.25	0.11	0.65	2	5.56	3.47	0.09	100					105	99	56	322	5		498	30	51
SAVP	6	T	Santorini	V-1	Lower Pumice 2	69.5	0.46	15.2	3.05	0.09	0.61	1.85	5.72	3.42	0.09	99.99		69.507	0.460046	15.2015	3.05031	0.090009	0.610061	1.85019	5.72057	3.42034	0.090009	100					106	92	58	337	12		504	29	45
SAVP	6	T	Santorini	V-1	Lower Pumice 2	69.5	0.45	15.2	3.14	0.1	0.59	2.02	5.73	3.26	0.08	100.07		69.4514	0.449685	15.1894	3.1378	0.09993	0.589587	2.01859	5.72599	3.25772	0.079944	100					103	92	57	317	7		486	31	53
SAVP	6	T	Santorini	V-1	Lower Pumice 2	69.6	0.49	15.4	3.19	0.11	0.75	1.94	5.19	3.24	0.1	100.01		69.593	0.489951	15.3985	3.18968	0.109989	0.749925	1.93981	5.18948	3.23968	0.09999	100					107	98	59	328	12		519	28	49
SAVP	6	T	Santorini	V-1	Lower Pumice 2	70.3	0.45	14.9	3.32	0.12	0.55	1.87	5.02	3.38	0.11	100.02		70.2859	0.44991	14.897	3.31934	0.119976	0.54989	1.86963	5.019	3.37932	0.109978	100					97	93	56	319	13		498	27	57
SAVP	6	T	Santorini	V-1	Lower Pumice 2	70.3	0.42	14.7	2.75	0.11	0.63	1.83	5.37	3.5	0.08	99.69		70.5186	0.421306	14.7457	2.75855	0.110342	0.631959	1.83569	5.3867	3.51088	0.0802488	100					98	85	55	315	14		468	21	64
SAVP	6	T	Santorini	V-1	Lower Pumice 2	70.8	0.43	14.8	2.77	0.1	0.55	1.8	4.7	3.67	0.08	99.7		71.013	0.431294	14.8445	2.77834	0.100301	0.551655	1.80542	4.71414	3.68104	0.0802407	100					100	83	53	315	12		459	35	58
SAVP	13	T	Santorini	V-1	Lower Pumice 2	71.78	0.39	14.4	2.94	0.11	0.46	1.7	4.96	3.02		99.76		71.9527	0.390938	14.4346	2.94707	0.110265	0.461107	1.70409	4.97193	3.02727		100
SAVP	13	T	Santorini	V-1	Lower Pumice 2	72.32	0.34	13.81	2.8	0.09	0.34	1.66	5.24	3.17		99.77		72.4867	0.340784	13.8418	2.80645	0.0902075	0.340784	1.66383	5.25208	3.17731		100
SAVP	13	T	Santorini	V-1	Lower Pumice 2	72.68	0.32	13.7	2.64	0.13	0.33	1.55	5.16	3.26		99.77		72.8475	0.320738	13.7316	2.64609	0.1303	0.330761	1.55357	5.1719	3.26752		100
SAVP	13	T	Santorini	V-1	Lower Pumice 2	72.45	0.28	14.27	2.36	0.16	0.24	1.22	5.43	3.34		99.75		72.6316	0.280702	14.3058	2.36591	0.160401	0.240602	1.22306	5.44361	3.34837		100
SAVP	13	T	Santorini	V-1	Lower Pumice 2	71.53	0.33	14.55	2.66	0.1	0.33	1.5	5.48	3.26		99.74		71.7165	0.33086	14.5879	2.66693	0.100261	0.33086	1.50391	5.49429	3.2685		100
SAVP	13	T	Santorini	V-1	Lower Pumice 2	72.36	0.29	13.78	2.44	0.11	0.29	1.29	5.51	3.65		99.72		72.5632	0.290814	13.8187	2.44685	0.110309	0.290814	1.29362	5.52547	3.66025		100
SAVP	13	T	Santorini	V-1	Lower Pumice 2	71.56	0.37	14.08	2.83	0.11	0.43	1.85	5.32	3.19		99.74		71.7465	0.370965	14.1167	2.83738	0.110287	0.431121	1.85482	5.33387	3.19832		100
SAVP	13	T	Santorini	V-1	Lower Pumice 2	71.5	0.34	14.13	2.76	0.14	0.37	1.61	5.66	3.25		99.76		71.672	0.340818	14.164	2.76664	0.140337	0.37089	1.61387	5.67362	3.25782		100
SAVP	13	T	Santorini	V-1	Lower Pumice 2	71.83	0.4	14.72	2.78	0.11	0.3	1.42	5.06	3.31		99.93		71.8803	0.40028	14.7303	2.78195	0.110077	0.30021	1.42099	5.06354	3.31232		100
SAVP	17	M	Santorini	V-1	Lower Pumice 2	68.25	0.263016	13.94	2.5	0.158	0.2772	1.3673	5.13	2.89	0.0172	94.7927		71.9992	0.277464	14.7058	2.63733	0.166679	0.292428	1.44241	5.41181	3.04876	0.0181449	100			20.44	12.71	126.4	68.13	53.33	359.14	14.47	4.01	528.89	34.27	70.2	8.08	29.93	6.76	1.217	7.5	1.189	8.59	2.04
SAVP	17	M	Santorini	V-1	Lower Pumice 2	68.51	0.291744	14.47	2.53	0.1864	0.3489	1.49	5.13	2.99	0.0739	96.0209		71.349	0.303834	15.0696	2.63484	0.194124	0.363358	1.55174	5.34258	3.1139	0.0769624	100			19.97	13.45	142.53	75.98	57.61	381.29	15.5	4.49	569.68	35.92	74.45	8.5	32.4	8.27	1.43	7.49	1.359	9.18	1.97
SAVP	17	M	Santorini	V-1	Lower Pumice 2	68.08	0.314424	14.38	2.89	0.145	0.3446	1.65	5.4	2.88	0.0383	96.1223		70.8264	0.327108	14.9601	3.00659	0.150849	0.358502	1.71656	5.61784	2.99618	0.0398451	100
SAVP	17	M	Santorini	V-1	Lower Pumice 2	67.79	0.32544	14.21	2.71	0.0603	0.3168	1.58	5.28	2.98	0.0687	95.3212		71.1174	0.341414	14.9075	2.84302	0.0632598	0.33235	1.65755	5.53916	3.12627	0.0720721	100			18.74	13.38	135.22	87.02	54.93	351.64	16.38	3.92	538.76	35.39	70.9	8.1	32.18	6.24	1.34	7.35	1.37	8.33	2.17
SAVP	17	M	Santorini	V-1	Lower Pumice 2	67.98	0.321264	14.3	2.44	0.1938	0.3253	1.63	5.37	2.95	0.0411	95.5515		71.1449	0.336221	14.9658	2.5536	0.202823	0.340445	1.70589	5.62001	3.08734	0.0430135	100
SAVP	17	M	Santorini	V-1	Lower Pumice 2	67.38	0.31932	14.83	2.4	0.0575	0.2899	1.65	5.64	2.91	0.0549	95.5316		70.5316	0.334256	15.5237	2.51226	0.0601895	0.30346	1.72718	5.9038	3.04611	0.0574679	100
SAVP	17	M	Santorini	V-1	Lower Pumice 2	68.17	0.31824	14.37	2.6	0.0575	0.3175	1.55	5.07	2.94	0.0494	95.4426		71.4251	0.333436	15.0562	2.72415	0.0602456	0.332661	1.62401	5.31209	3.08038	0.0517588	100
SAVP	17	M	Santorini	V-1	Lower Pumice 2	68.04	0.318024	14.71	2.49	0.0633	0.3051	1.6	5.54	2.96	0.0228	96.0492		70.8387	0.331105	15.3151	2.59242	0.0659037	0.31765	1.66581	5.76788	3.08175	0.0237378	100
SAVP	17	M	Santorini	V-1	Lower Pumice 2	65.7	0.310752	13.76	2.72	0.1209	0.3191	1.5	4.44	2.98	0.067	91.9178		71.4769	0.338076	14.9699	2.95917	0.131531	0.347158	1.63189	4.83041	3.24203	0.0728913	100
SAVP	17	M	Santorini	V-1	Lower Pumice 2	68.39	0.25596	13.69	2.44	0.0745	0.2601	1.3666	5.05	3.18	0.0033	94.7105		72.2096	0.270255	14.4546	2.57627	0.0786608	0.274626	1.44292	5.33204	3.3576	0.0034843	100			21.05	11.53	127.01	62.57	51.3	350.08	15.81	4.37	517.35	32.31	65.76	7.44	29.43	5.89	1.04	6.95	1.118	8.82	1.96
SAVP	17	M	Santorini	V-1	Lower Pumice 2	68.09	0.313632	14.38	2.57	0.0838	0.2829	1.53	5.43	2.92	0.026	95.6263		71.2042	0.327977	15.0377	2.68754	0.0876328	0.295839	1.59998	5.67835	3.05355	0.0271892	100
SAVP	17	M	Santorini	V-1	Lower Pumice 2	67.5	0.31464	14.21	2.53	0.0765	0.293	1.56	4.78	3.17	0.0216	94.4557		71.462	0.333108	15.0441	2.6785	0.0809903	0.310198	1.65157	5.06057	3.35607	0.0228679	100			11.25	13.43	110.86	82.6	51.27	342.83	13.97	3.7	538.58	32.51	62.03	7	27.6	4.87	2.05	8.62	1.16	6.91	1.83
SAVP	17	M	Santorini	V-1	Lower Pumice 2	68.45	0.29484	14.43	2.72	0.0033	0.3414	1.61	5.27	2.87	0.06	96.0495		71.2653	0.306967	15.0235	2.83187	0.00343573	0.355442	1.67622	5.48675	2.98804	0.0624678	100			29.34	11.29	110.9	80.33	47.18	312.53	12.99	3.37	511.47	30.59	63.55	7.12	25.93	5.54	1.36	6.73	1.23	8.69	1.86
SAVP	17	M	Santorini	V-1	Lower Pumice 2	67.85	0.304992	14.16	2.64	0.1068	0.3467	1.52	5.49	2.79	0.0178	95.2263		71.2513	0.320281	14.8698	2.77234	0.112154	0.36408	1.5962	5.76521	2.92986	0.0186923	100
SAVP	17	M	Santorini	V-1	Lower Pumice 2	68.16	0.33984	14.52	2.63	0.063	0.3191	1.51	5.13	2.99	0.0388	95.7007		71.222	0.355107	15.1723	2.74815	0.0658302	0.333435	1.57784	5.36046	3.12432	0.0405431	100
SAVP	17	M	Santorini	V-1	Lower Pumice 2	67.82	0.36432	14.48	2.69	0.153	0.3515	1.61	5.34	2.97	0.066	95.8448		70.7602	0.380114	15.1078	2.80662	0.159633	0.366739	1.6798	5.57151	3.09876	0.0688613	100			19.28	11.63	128.28	89.14	50.95	333	13.89	3.66	528.53	32.37	67.41	7.97	29.03	6.53	1.35	6.93	1.24	8.96	1.9
SAVP	17	M	Santorini	V-1	Lower Pumice 2	68.05	0.332136	14.12	2.57	0.059	0.3742	1.51	4.9	2.66	0.0362	94.6115		71.9257	0.351052	14.9242	2.71637	0.0623603	0.395512	1.596	5.17907	2.8115	0.0382617	100			23.87	11.32	98.04	71.36	47.6	351.05	13.93	3.53	452.01	28.3	58.76	6.7	27.77	6.31	1.2	6.64	1.31	7.37	1.49
SAVP	17	M	Santorini	V-1	Lower Pumice 2	67.82	0.329256	14.33	2.82	0.1487	0.3564	1.67	5.28	2.77	0.041	95.5654		70.9671	0.344535	14.995	2.95086	0.1556	0.372938	1.7475	5.52501	2.89854	0.0429026	100
SAVP	17	M	Santorini	V-1	Lower Pumice 2	68.95	0.245952	13.67	2.3	0.1073	0.1727	1.1325	5.2	3.25	0.0283	95.0568		72.5356	0.258742	14.3809	2.41961	0.11288	0.181681	1.19139	5.47042	3.41901	0.0297717	100
SAVP	17	M	Santorini	V-1	Lower Pumice 2	68.24	0.326736	14.5	2.63	0.1127	0.3072	1.62	5.36	2.94	0.0577	96.0943		71.0136	0.340016	15.0893	2.73689	0.117281	0.319686	1.68584	5.57785	3.05949	0.0600452	100
SAVP	17	M	Santorini	V-1	Lower Pumice 2	67.83	0.33984	14.07	2.64	0.1713	0.3709	1.56	5.01	2.85	0.0809	94.9229		71.458	0.358017	14.8225	2.7812	0.180462	0.390738	1.64344	5.27797	3.00244	0.085227	100
SAVP	17	M	Santorini	V-1	Lower Pumice 2	68.94	0.243	13.98	2.39	0.1406	0.257	1.2504	5.13	3.23	0.0706	95.6316		72.0891	0.2541	14.6186	2.49917	0.147023	0.26874	1.30752	5.36434	3.37754	0.073825	100
SAVP	1		Santorini	V-3	Lower Pumice 1	65.78	0.47	14.54	4.27	0.11	0.62	2.02	4.81	3.15	0	95.77		68.6854	0.490759	15.1822	4.4586	0.114859	0.647384	2.10922	5.02245	3.28913	0	100
SAVP	3	M	Santorini	V-3	Lower Pumice 1	69.84	0.45	15.2	3.51	0.09	0.5	1.8	5.28	3.33		100		69.84	0.45	15.2	3.51	0.09	0.5	1.8	5.28	3.33		100
SAVP	3	M	Santorini	V-3	Lower Pumice 1	68.99	0.49	15.25	4.04	0.12	0.65	2.19	5.04	3.3		100.07		68.9417	0.489657	15.2393	4.03717	0.119916	0.649545	2.18847	5.03647	3.29769		100
SAVP	4	T	Santorini	V-3	Lower Pumice 1	68.4	0.5	14.7	3.52	0.12	0.83	2.17	6.21	3.48	0.11	100.04		68.3727	0.4998	14.6941	3.51859	0.119952	0.829668	2.16913	6.20752	3.47861	0.109956	100					103	111	59	315	13		423	21	58
SAVP	4	T	Santorini	V-3	Lower Pumice 1	58.1	1.04	17.9	6.78	0.15	2.8	7.24	4.08	1.6	0.21	99.9		58.1582	1.04104	17.9179	6.78679	0.15015	2.8028	7.24725	4.08408	1.6016	0.21021	100					58	215	40	171	9		321	25	33
SAVP	4	T	Santorini	V-3	Lower Pumice 1	54.4	1.2	19.7	7.5	0.16	3.06	9.32	3.44	0.96	0.32	100.06		54.3674	1.19928	19.6882	7.4955	0.159904	3.05817	9.31441	3.43794	0.959424	0.319808	100					32	283	33	104	8		180	10	37
SAVP	6	T	Santorini	V-3	Lower Pumice 1	53.5	1.32	18.9	8.24	0.15	3.76	9.37	3.56	0.86	0.31	99.97		53.5161	1.3204	18.9057	8.24247	0.150045	3.76113	9.37281	3.56107	0.860258	0.310093	100					32	296	27	95	12		201	25	21
SAVP	6	T	Santorini	V-3	Lower Pumice 1	53.8	1.2	19.6	7.92	0.14	3.4	9.41	3.4	0.9	0.23	100		53.8	1.2	19.6	7.92	0.14	3.4	9.41	3.4	0.9	0.23	100					28	296	26	99	10		215	15	29
SAVP	6	T	Santorini	V-3	Lower Pumice 1	53.9	1.28	19	8.05	0.18	3.53	9.27	3.6	0.9	0.29	100		53.9	1.28	19	8.05	0.18	3.53	9.27	3.6	0.9	0.29	100					31	274	27	115	15		211	17	18
SAVP	6	T	Santorini	V-3	Lower Pumice 1	54.4	1.2	19.7	7.5	0.16	3.06	9.32	3.44	0.96	0.32	100.06		54.3674	1.19928	19.6882	7.4955	0.159904	3.05817	9.31441	3.43794	0.959424	0.319808	100					32	283	33	104	8		180	10	37
SAVP	6	T	Santorini	V-3	Lower Pumice 1	55.8	1.75	17.6	7.92	0.22	3.13	7.07	4.67	1.13	0.71	100		55.8	1.75	17.6	7.92	0.22	3.13	7.07	4.67	1.13	0.71	100					41	308	46	130	8		257	22	38
SAVP	6	T	Santorini	V-3	Lower Pumice 1	57.9	1.24	17.7	6.97	0.16	2.68	7.14	4.38	1.55	0.37	100.09		57.8479	1.23889	17.6841	6.96373	0.159856	2.67759	7.13358	4.37606	1.54861	0.369667	100					62	243	39	153	6		278	9	54
SAVP	6	T	Santorini	V-3	Lower Pumice 1	58	1.08	17.7	6.91	0.12	2.94	7.43	3.95	1.52	0.26	99.91		58.0522	1.08097	17.7159	6.91622	0.120108	2.94265	7.43669	3.95356	1.52137	0.260234	100					53	231	35	145	12		266	20	49
SAVP	6	T	Santorini	V-3	Lower Pumice 1	58.1	1.04	17.9	6.78	0.15	2.8	7.24	4.08	1.6	0.21	99.9		58.1582	1.04104	17.9179	6.78679	0.15015	2.8028	7.24725	4.08408	1.6016	0.21021	100					58	215	40	171	9		321	25	33
SAVP	6	T	Santorini	V-3	Lower Pumice 1	62.3	0.84	16.9	0.13	5.56	1.94	5.31	4.62	2.23	0.19	100.02		62.2875	0.839832	16.8966	0.129974	5.55889	1.93961	5.30894	4.61908	2.22955	0.189962	100					77	173	43	227	11		404	29	27
SAVP	6	T	Santorini	V-3	Lower Pumice 1	66.3	0.71	15.6	4.37	0.17	1.11	3.01	5.86	2.67	0.21	100.01		66.2934	0.709929	15.5984	4.36956	0.169983	1.10989	3.0097	5.85941	2.66973	0.209979	100					100	143	51	284	4		467	33	44
SAVP	6	T	Santorini	V-3	Lower Pumice 1	66.8	0.64	14.9	4.94	0.11	1.15	3.45	4.54	3.31	0.17	100.01		66.7933	0.639936	14.8985	4.93951	0.109989	1.14989	3.44966	4.53955	3.30967	0.169983	100					120	135	51	276	10		393	24	43
SAVP	6	T	Santorini	V-3	Lower Pumice 1	67.2	0.54	15.1	3.61	0.13	0.76	3.87	5.28	3.38	0.11	99.98		67.2134	0.540108	15.103	3.61072	0.130026	0.760152	3.87077	5.28106	3.38068	0.110022	100					111	106	52	310	10		482	26	80
SAVP	6	T	Santorini	V-3	Lower Pumice 1	68.1	0.58	15.4	3.91	0.12	0.71	2.44	5.46	3.15	0.13	100		68.1	0.58	15.4	3.91	0.12	0.71	2.44	5.46	3.15	0.13	100					117	117	58	321	9		507	42	54
SAVP	6	T	Santorini	V-3	Lower Pumice 1	68.4	0.54	15	3.72	0.14	0.84	2.41	5.5	3.36	0.14	100.05		68.3658	0.53973	14.9925	3.71814	0.13993	0.83958	2.4088	5.49725	3.35832	0.13993	100					101	110	56	310	14		494	27	65
SAVP	6	T	Santorini	V-3	Lower Pumice 1	68.4	0.56	15	3.66	0.12	0.74	2.14	5.91	3.46	0.11	100.1		68.3317	0.559441	14.985	3.65634	0.11988	0.739261	2.13786	5.9041	3.45654	0.10989	100					118	105	58	345	13		471	35	49
SAVP	6	T	Santorini	V-3	Lower Pumice 1	68.4	0.5	14.7	3.52	0.12	0.83	2.17	6.21	3.48	0.11	100.04		68.3727	0.4998	14.6941	3.51859	0.119952	0.829668	2.16913	6.20752	3.47861	0.109956	100					103	111	59	315	13		423	21	58
SAVP	6	T	Santorini	V-3	Lower Pumice 1	68.6	0.56	15.3	3.76	0.14	0.62	2.27	5.5	3.15	0.12	100.02		68.5863	0.559888	15.2969	3.75925	0.139972	0.619876	2.26955	5.4989	3.14937	0.119976	100					123	114	55	329	9		523	32	55
SAVP	6	T	Santorini	V-3	Lower Pumice 1	68.8	0.56	15.2	3.67	0.1	0.62	2.2	5.26	3.43	0.11	99.95		68.8344	0.56028	15.2076	3.67184	0.10005	0.62031	2.2011	5.26263	3.43172	0.110055	100					117	107	53	320	7		516	39	65
SAVP	6	T	Santorini	V-3	Lower Pumice 1	69.2	0.53	15.1	3.29	0.13	0.71	2.09	5.22	3.32	0.11	99.7		69.4082	0.531595	15.1454	3.2999	0.130391	0.712136	2.09629	5.23571	3.32999	0.110331	100					112	98	55	314	15		493	33	73
SAVP	6	T	Santorini	V-3	Lower Pumice 1	69.4	0.58	15.3	3.8	0.13	0.67	2.23	4.41	3.4	0.1	100.02		69.3861	0.579884	15.2969	3.79924	0.129974	0.669866	2.22955	4.40912	3.39932	0.09998	100					124	109	57	341	13		514	31	56
SAVP	6	T	Santorini	V-3	Lower Pumice 1	69.6	0.57	15.3	3.87	0.13	0.67	2.38	4.13	3.27	0.11	100.03		69.5791	0.569829	15.2954	3.86884	0.129961	0.669799	2.37929	4.12876	3.26902	0.109967	100					117	111	57	347	14		536	38	59
SAVP	17	M	Santorini	V-3	Lower Pumice 1	67.29	0.393408	14.55	3.12	0.0629	0.4237	1.77	4.75	3.19	0.0105	95.5605		70.4161	0.411685	15.226	3.26495	0.0658222	0.443384	1.85223	4.97067	3.3382	0.0109878	100			23.32	13.76	144.91	87.79	51.34	360.77	15.33	4.49	552.11	36.36	74.16	8.22	31.08	7.57	1.37	7.76	1.319	8.79	1.95
SAVP	17	M	Santorini	V-3	Lower Pumice 1	65.28	0.330984	13.58	2.91	0.0992	0.381	1.69	4.63	3.11	0.0592	92.0704		70.9023	0.35949	14.7496	3.16063	0.107744	0.413814	1.83555	5.02876	3.37785	0.0642986	100
SAVP	17	M	Santorini	V-3	Lower Pumice 1	68.1	0.427176	13.89	3.06	0.1537	0.3639	1.6	4.87	3.27	0.1031	95.8379		71.0575	0.445728	14.4932	3.19289	0.160375	0.379704	1.66949	5.0815	3.41201	0.107578	100
SAVP	17	M	Santorini	V-3	Lower Pumice 1	65.94	0.437184	14.1	3.02	0.1163	0.4388	1.75	4.76	3.14	0.0543	93.7566		70.3311	0.466297	15.0389	3.22111	0.124045	0.46802	1.86654	5.07698	3.3491	0.0579159	100
SAVP	17	M	Santorini	V-3	Lower Pumice 1	67.55	0.35964	14.09	2.97	0.1616	0.4018	1.7	5.24	3.28	0.0658	95.8188		70.4976	0.375333	14.7048	3.0996	0.168652	0.419333	1.77418	5.46865	3.42313	0.0686713	100			18.7	11.85	125.02	72.7	49.99	354.48	15.09	4.15	447.39	30.14	65.02	7.95	31.2	7.28	1.14	6.87	0.969	6.34	1.36
SAVP	17	M	Santorini	V-3	Lower Pumice 1	68.13	0.331776	13.78	2.81	0.1407	0.3733	1.51	4.88	3.33	0.0355	95.3213		71.4741	0.348061	14.4564	2.94793	0.147606	0.391623	1.58412	5.11953	3.49345	0.0372425	100
SAVP	17	M	Santorini	V-3	Lower Pumice 1	69.83	0.319248	13.06	2.71	0.1551	0.3313	1.293	4.5	3.45	0.0905	95.7391		72.9378	0.333456	13.6412	2.83061	0.162003	0.346044	1.35054	4.70027	3.60354	0.0945277	100			21.8	14.18	137.15	84.73	51.28	365.01	15.25	4.16	558.87	36.84	75.24	8.68	31.17	7.3	1.35	8.31	1.18	8.86	2.04
SAVP	17	M	Santorini	V-3	Lower Pumice 1	69.14	0.425304	13.71	2.97	0.1306	0.3718	1.44	4.85	3.28	0.0227	96.3404		71.7664	0.44146	14.2308	3.08282	0.135561	0.385923	1.4947	5.03423	3.40459	0.0235623	100
SAVP	17	M	Santorini	V-3	Lower Pumice 1	67.96	0.369072	14.33	3.11	0.0738	0.3522	1.68	5.03	3.27	0.0781	96.2532		70.6055	0.383439	14.8878	3.23106	0.0766728	0.36591	1.7454	5.2258	3.39729	0.0811402	100			21.45	12.87	134.92	58.5	48.4	362.62	14.81	4.15	423.83	31.36	66.14	7.77	29.66	6.49	1.04	6.72	1.212	7.17	1.75
SAVP	17	M	Santorini	V-3	Lower Pumice 1	68.01	0.373104	14.5	2.93	0.0493	0.371	1.68	4.84	3.26	0.0825	96.0959		70.773	0.388262	15.0891	3.04904	0.0513029	0.386073	1.74825	5.03664	3.39244	0.0858517	100
SAVP	17	M	Santorini	V-3	Lower Pumice 1	67.4	0.377424	14.39	2.77	0.0399	0.3445	1.69	4.89	3.22	0.0437	95.1655		70.824	0.396597	15.121	2.91072	0.0419269	0.362001	1.77585	5.13842	3.38358	0.04592	100
SAVP	17	M	Santorini	V-3	Lower Pumice 1	67.59	0.393264	14.31	2.99	0.074	0.3417	1.7	5.26	3.34	0.0565	96.0555		70.3656	0.409413	14.8976	3.11278	0.0770388	0.355732	1.76981	5.476	3.47716	0.0588202	100
SAVP	17	M	Santorini	V-3	Lower Pumice 1	68.14	0.512568	14.05	3.4	0.1016	0.5134	1.8	5.28	3.09	0.0901	96.9777		70.2636	0.528542	14.4879	3.50596	0.104766	0.5294	1.8561	5.44455	3.1863	0.092908	100
SAVP	17	M	Santorini	V-3	Lower Pumice 1	63.43	0.318888	13.46	2.87	0.0905	0.3332	1.46	4.58	3.24	0.0515	89.8341		70.6079	0.354974	14.9832	3.19478	0.100741	0.370906	1.62522	5.09829	3.60665	0.0573279	100
SAVP	17	M	Santorini	V-3	Lower Pumice 1	67.93	0.409104	14.3	3.31	0.1766	0.3961	1.85	4.48	3.18	0.0576	96.0894		70.6946	0.425753	14.882	3.44471	0.183787	0.41222	1.92529	4.66232	3.30942	0.0599442	100
SAVP	17	M	Santorini	V-3	Lower Pumice 1	67.66	0.448272	14.48	3.42	0.1255	0.4179	1.88	4.62	3.05	0.0603	96.162		70.3605	0.466163	15.0579	3.5565	0.130509	0.434579	1.95503	4.80439	3.17173	0.0627067	100
SAVP	17	M	Santorini	V-3	Lower Pumice 1	66.47	0.349992	15.77	2.88	0.174	0.396	2.57	5.01	2.86	0.0503	96.5303		68.8592	0.362572	16.3368	2.98352	0.180254	0.410234	2.66238	5.19008	2.9628	0.052108	100
SAVP	17	M	Santorini	V-3	Lower Pumice 1	67.64	0.431928	14.46	3.44	0.1336	0.4931	1.87	4.47	3.14	0.0599	96.1385		70.3568	0.449277	15.0408	3.57817	0.138966	0.512906	1.94511	4.64954	3.26612	0.0623059	100			12.19	15.15	167.99	99.95	56.79	377.17	17.87	5.17	611.14	41.23	80.3	9.18	35.59	8.3	1.45	8.14	1.42	9.06	1.89
SAVP	17	M	Santorini	V-3	Lower Pumice 1	66.8	0.478584	14.6	3.5	0.1842	0.5509	1.95	4.87	3.24	0.0885	96.2622		69.3938	0.497167	15.1669	3.6359	0.191352	0.572291	2.02572	5.0591	3.36581	0.0919364	100
SAVP	17	M	Santorini	V-3	Lower Pumice 1	67.69	0.364104	14.53	3.31	0.0998	0.4433	1.79	3.97	3.24	0.0935	95.5307		70.8568	0.381138	15.2098	3.46485	0.104469	0.464039	1.87374	4.15573	3.39158	0.0978743	100
SAVP	17	M	Santorini	V-3	Lower Pumice 1	67.35	0.448848	14.49	3.24	0.1221	0.4864	1.86	4.58	3.16	0.0675	95.8048		70.2992	0.468502	15.1245	3.38187	0.127447	0.507699	1.94145	4.78055	3.29837	0.0704557	100
SAVP	17	M	Santorini	V-3	Lower Pumice 1	66.81	0.445752	14.31	3.22	0.0562	0.4192	1.8	4.62	3.13	0.0708	94.882		70.4138	0.469796	15.0819	3.39369	0.0592315	0.441812	1.89709	4.86921	3.29884	0.074619	100			20.23	13.85	141.43	87.52	48.05	335.72	14.92	4.86	510.33	32.21	65.23	7.69	29.79	7.01	1.36	7.21	1.196	7.6	1.78
SAVP	17	M	Santorini	V-3	Lower Pumice 1	67.83	0.43344	14.44	3.23	0.0989	0.4864	1.81	4.6	3.19	0.0908	96.2095		70.5024	0.450517	15.0089	3.35726	0.102796	0.505563	1.88131	4.78123	3.31568	0.0943773	100			17.45	14.69	162.25	100.38	54.83	369.39	15.93	4.6	579.09	38.28	78.48	9.23	32.36	7.28	1.19	8.29	1.212	9.05	2.07
SAVP	17	M	Santorini	V-3	Lower Pumice 1	67.72	0.39528	14.37	3.1	0.0705	0.4465	1.88	4.32	3.15	0.0748	95.5271		70.8909	0.413788	15.0429	3.24515	0.0738011	0.467407	1.96803	4.52228	3.29749	0.0783024	100
SAVP	17	M	Santorini	V-3	Lower Pumice 1	66.96	0.4518	14.56	3.04	0.2023	0.4247	1.92	4.7	3.21	0.0625	95.5313		70.0922	0.472934	15.2411	3.1822	0.211763	0.444566	2.00981	4.91985	3.36016	0.0654236	100
SAVP	17	M	Santorini	V-3	Lower Pumice 1	67.55	0.405576	14.32	3.08	0.1115	0.4099	1.82	4.69	3.19	0.0719	95.6489		70.6229	0.424026	14.9714	3.22011	0.116572	0.428547	1.90279	4.90335	3.33511	0.0751708	100
SAVP	17	M	Santorini	V-3	Lower Pumice 1	67.67	0.409824	14.37	3.09	0.1731	0.4463	1.89	4.82	3.15	0.0587	96.0779		70.4324	0.426554	14.9566	3.21614	0.180166	0.464519	1.96715	5.01676	3.27859	0.0610962	100
SAVP	17	M	Santorini	V-3	Lower Pumice 1	67.51	0.348264	14.2	2.97	0.1509	0.349	1.7	4.99	3.27	0.0835	95.5717		70.6381	0.364401	14.858	3.10762	0.157892	0.365171	1.77877	5.22121	3.42152	0.087369	100
SAVP	17	M	Santorini	V-3	Lower Pumice 1	67.27	0.388224	13.9	3.25	0.1238	0.3942	1.48	4.34	3.6	0.0859	94.8321		70.9359	0.40938	14.6575	3.42711	0.130546	0.415682	1.56065	4.57651	3.79618	0.0905811	100
SAVP	17	M	Santorini	V-3	Lower Pumice 1	66.65	0.690984	14.07	4.69	0.1568	0.4738	1.73	4.47	3.05	0.117	96.0986		69.3559	0.719037	14.6412	4.8804	0.163166	0.493035	1.80023	4.65147	3.17382	0.12175	100
SAVP	17	M	Santorini	V-3	Lower Pumice 1	66.7	0.390888	15.56	2.79	0.1125	0.3815	2.52	5	2.84	0.067	96.3619		69.2182	0.405646	16.1475	2.89534	0.116747	0.395903	2.61514	5.18877	2.94722	0.0695296	100
SAVP	4	T	Santorini		Cape Therma 3	63.8	1.01	15.8	5.94	0.15	1.45	3.95	4.77	2.82	0.15	99.84		63.9022	1.01162	15.8253	5.94952	0.15024	1.45232	3.95633	4.77764	2.82452	0.15024	100					114	179	53	295	13		484	38	63
SAVP	4	T	Santorini		Cape Therma 3	60.8	1.08	16.4	6.88	0.15	2.21	5.16	4.69	2.45	0.27	100.09		60.7453	1.07903	16.3853	6.87381	0.149865	2.20801	5.15536	4.68578	2.4478	0.269757	100					90	198	53	272	13		484	22	68
SAVP	6	T	Santorini		Cape Therma 3	60.8	1.15	16.1	6.25	0.14	2.35	5.27	4.72	2.35	0.27	99.4		61.167	1.15694	16.1972	6.28773	0.140845	2.36419	5.30181	4.74849	2.36419	0.27163	100					96	181	51	248	12		391	26	58
SAVP	6	T	Santorini		Cape Therma 3	60.8	1.13	16.3	6.97	0.13	2.32	5.3	4.33	2.44	0.28	100		60.8	1.13	16.3	6.97	0.13	2.32	5.3	4.33	2.44	0.28	100					90	185	45	256	10		443	36	65
SAVP	6	T	Santorini		Cape Therma 3	60.9	1.17	16.1	6.99	0.14	2.31	5.21	4.51	2.36	0.26	99.95		60.9305	1.17059	16.1081	6.9935	0.14007	2.31116	5.21261	4.51226	2.36118	0.26013	100					87	191	48	249	16		403	30	60
SAVP	6	T	Santorini		Cape Therma 3	61	1.16	16.1	7.05	0.16	2.26	5.26	4.4	2.49	0.26	100.14		60.9147	1.15838	16.0775	7.04014	0.159776	2.25684	5.25265	4.39385	2.48652	0.259637	100					91	187	48	235	12		409	19	56
SAVP	6	T	Santorini		Cape Therma 3	61	1.13	16	6.98	0.14	2.34	5.34	4.3	2.51	0.28	100.02		60.9878	1.12977	15.9968	6.9786	0.139972	2.33953	5.33893	4.29914	2.5095	0.279944	100					91	191	45	239	12		416	27	58
SAVP	6	T	Santorini		Cape Therma 3	61.1	1.15	16	7.05	0.13	2.27	5.15	4.46	2.43	0.3	100.04		61.0756	1.14954	15.9936	7.04718	0.129948	2.26909	5.14794	4.45822	2.42903	0.29988	100					90	188	48	243	12		412	28	70
SAVP	6	T	Santorini		Cape Therma 3	61.1	1.15	16.1	7.02	0.14	2.3	5.16	4.43	2.4	0.29	100.09		61.0451	1.14897	16.0855	7.01369	0.139874	2.29793	5.15536	4.42602	2.39784	0.289739	100					90	191	51	237	12		404	30	62
SAVP	6	T	Santorini		Cape Therma 3	61.9	1.13	15.9	6.9	0.15	1.96	4.65	4.58	2.57	0.24	99.98		61.9124	1.13023	15.9032	6.90138	0.15003	1.96039	4.65093	4.58092	2.57051	0.240048	100					97	197	47	253	6		390	47	20
SAVP	6	T	Santorini		Cape Therma 3	62.6	1.09	16.2	6.48	0.16	1.7	4.44	4.52	2.57	0.26	100.02		62.5875	1.08978	16.1968	6.4787	0.159968	1.69966	4.43911	4.5191	2.56949	0.259948	100					95	178	46	270	13		442	31	39
SAVP	6	T	Santorini		Cape Therma 3	62.8	1.06	16	6.36	0.17	1.74	4.51	4.49	2.67	0.25	100.05		62.7686	1.05947	15.992	6.35682	0.169915	1.73913	4.50775	4.48776	2.66867	0.249875	100					97	185	52		12		445	37	46
SAVP	6	T	Santorini		Cape Therma 3	63.3	1.07	15.9	6.2	0.15	1.59	4.1	4.6	2.77	0.25	99.93		63.3443	1.07075	15.9111	6.20434	0.150105	1.59111	4.10287	4.60322	2.77194	0.250175	100					104	174	50	280	13		470	33	33
SAVP	6	T	Santorini		Cape Therma 3	63.5	1.06	15.4	6.29	0.15	1.62	4.08	4.75	2.85	0.25	99.95		63.5318	1.06053	15.4077	6.29315	0.150075	1.62081	4.08204	4.75238	2.85143	0.250125	100					100	174	50	261	6		427	19	61
SAVP	6	T	Santorini		Cape Therma 3	63.6	1.02	15.9	6.1	0.15	1.56	4.03	4.64	2.8	0.26	100.06		63.5619	1.01939	15.8905	6.09634	0.14991	1.55906	4.02758	4.63722	2.79832	0.259844	100					100	178	53	288	14		460	22	54
SAVP	6	T	Santorini		Cape Therma 3	63.8	1.01	15.8	5.95	0.15	1.45	3.95	4.77	2.82	0.24	99.94		63.8383	1.01061	15.8095	5.95357	0.15009	1.45087	3.95237	4.77286	2.82169	0.240144	100					114	179	53	295	13		484	38	63
SAVP	6	T	Santorini		Cape Therma 3	64.1	0.98	15.6	5.76	0.16	1.46	3.91	4.85	2.9	0.26	99.98		64.1128	0.980196	15.6031	5.76115	0.160032	1.46029	3.91078	4.85097	2.90058	0.260052	100					109	174	50	297	12		456	28	56
SAVP	6	T	Santorini		Cape Therma 3	64.3	0.97	15.7	5.75	0.15	1.38	3.69	4.81	2.95	0.25	99.95		64.3322	0.970485	15.7079	5.75288	0.150075	1.38069	3.69185	4.81241	2.95148	0.250125	100					110	167	56	309	15		500	31	46
SAVP	6	T	Santorini		Cape Therma 3	64.4	0.97	15.8	5.78	0.14	1.29	3.64	4.75	2.95	0.25	99.97		64.4193	0.970291	15.8047	5.78173	0.140042	1.29039	3.64109	4.75143	2.95089	0.250075	100					112	167	51	298	17		486	34	60
SAVP	6	T	Santorini		Cape Therma 3	64.8	0.98	15.4	5.75	0.14	1.4	3.59	4.63	3.03	0.27	99.99		64.8065	0.980098	15.4015	5.75058	0.140014	1.40014	3.59036	4.63046	3.0303	0.270027	100					110	162	50	273	15		491	31	61
SAVP	17	M	Santorini		Cape Therma 3	62.38	1.11406	15.68	6.17	0.2764	1.4545	4.17	4.63	2.78	0.2902	98.9452		63.045	1.12593	15.8472	6.23578	0.279347	1.47001	4.21446	4.67936	2.80964	0.293294	100
SAVP	17	M	Santorini		Cape Therma 3	60.99	1.11989	15.44	6.61	0.1118	1.5743	3.95	4.34	2.91	0.2633	97.3093		62.6764	1.15085	15.8669	6.79277	0.114891	1.61783	4.05922	4.46001	2.99046	0.270581	100
SAVP	17	M	Santorini		Cape Therma 3	62.67	1.13069	15.38	6.58	0.1006	1.3537	4.07	4.67	2.92	0.2766	99.1516		63.2062	1.14036	15.5116	6.6363	0.101461	1.36528	4.10483	4.70996	2.94499	0.278967	100
SAVP	17	M	Santorini		Cape Therma 3	62.2	1.10261	15.5	6.78	0.1924	1.5783	4.16	4.63	2.89	0.2643	99.2976		62.64	1.11041	15.6096	6.82796	0.193761	1.58946	4.18943	4.66275	2.91044	0.26617	100			21.21	17.48	107.38	153.62	39.46	242.28	13.16	3.41	389.5	29.07	62.9	7.11	28.26	6.24	1.552	5.85	0.955	6.83	1.398
SAVP	17	M	Santorini		Cape Therma 3	62.41	1.12306	15.33	6.46	0.1377	1.91	4.17	4.46	2.98	0.3276	99.3084		62.8447	1.13088	15.4368	6.50499	0.138659	1.9233	4.19904	4.49106	3.00075	0.329882	100			20.75	17.45	100.93	139.69	36.29	233.17	12.62	3.21	368.52	27.01	57.15	6.34	25.2	6.13	1.296	5.55	1.006	6.41	1.429
SAVP	17	M	Santorini		Cape Therma 3	60.46	1.03752	15.01	6.19	0.1331	1.5218	3.94	4.49	2.94	0.3129	96.0353		62.956	1.08035	15.6297	6.44555	0.138595	1.58463	4.10266	4.67536	3.06137	0.325818	100
SAVP	17	M	Santorini		Cape Therma 3	61.67	1.09116	15.23	5.01	0.1277	1.2854	3.4	4.38	3.07	0.2767	95.541		64.5482	1.14209	15.9408	5.24382	0.13366	1.34539	3.55868	4.58442	3.21328	0.289614	100			18.88	14.72	94.46	124.33	34.26	221.47	12	2.89	352.18	25.74	54.34	6.28	24.12	5.57	1.264	5.11	0.874	5.91	1.194
SAVP	17	M	Santorini		Cape Therma 3	62.76	1.06618	15.57	4.77	0.0375	1.2014	3.33	4.57	3.17	0.2641	96.7392		64.8755	1.10211	16.0948	4.93078	0.038764	1.2419	3.44225	4.72404	3.27685	0.273002	100			18.62	15.47	90.12	119.69	33.96	215.14	10.99	2.84	329.73	23.22	51.05	6.09	23.62	5.13	1.114	5.65	0.827	5.47	1.189
SAVP	17	M	Santorini		Cape Therma 3	62.91	1.12442	15.94	5.92	0.2067	1.4692	4.08	4.82	2.78	0.2566	99.5069		63.2217	1.13	16.019	5.94933	0.207724	1.47648	4.10022	4.84388	2.79378	0.257872	100			23.8	18.17	109.07	137.2	41.01	264.02	13.61	3.51	403.53	30.15	63.71	7.37	28.89	6.85	1.553	6.12	1.112	6.59	1.6
SAVP	17	M	Santorini		Cape Therma 3	62.92	1.09037	15.46	5.76	0.1867	1.4109	3.77	4.56	2.98	0.2303	98.3683		63.9637	1.10846	15.7165	5.85555	0.189797	1.4343	3.83254	4.63564	3.02943	0.23412	100
SAVP	17	M	Santorini		Cape Therma 3	62.09	1.10513	15.23	6.25	0.1688	1.463	3.87	4.53	2.93	0.2876	97.9245		63.406	1.12855	15.5528	6.38247	0.172378	1.49401	3.95202	4.62601	2.9921	0.293696	100
SAVP	17	M	Santorini		Cape Therma 3	61.95	1.12442	15.4	6.94	0.1658	1.6201	4.07	4.47	3.11	0.2992	99.1495		62.4814	1.13407	15.5321	6.99953	0.167222	1.634	4.10491	4.50834	3.13668	0.301766	100
SAVP	17	M	Santorini		Cape Therma 3	60.92	1.14077	15.13	7.59	0.1102	2.45	4.89	4.27	2.68	0.2643	99.4453		61.2598	1.14713	15.2144	7.63234	0.110815	2.46367	4.91728	4.29382	2.69495	0.265774	100
SAVP	17	M	Santorini		Cape Therma 3	61.34	1.10225	15.25	6.67	0.1804	1.4207	4.59	5.09	2.37	0.2129	98.2262		62.4477	1.12215	15.5254	6.79045	0.183658	1.44635	4.67289	5.18191	2.4128	0.216745	100
SAVP	17	M	Santorini		Cape Therma 3	61.11	1.08425	15.13	6.44	0.1825	1.5992	4.13	4.38	2.9	0.2345	97.1904		62.8765	1.11559	15.5674	6.62617	0.187776	1.64543	4.24939	4.50662	2.98383	0.241279	100
SAVP	4	T	Santorini		Cape Therma 2	69.6	0.63	15.4	3.28	0.1	0.69	2.31	4.58	3.34	0.11	100.04		69.5722	0.629748	15.3938	3.27869	0.09996	0.689724	2.30908	4.57817	3.33866	0.109956	100					120	118	54	328	15		541	36	78
SAVP	6	T	Santorini		Cape Therma 2	69	0.7	14.8	3.65	0.11	0.97	2.54	4.94	3.17	0.17	100.05		68.9655	0.69965	14.7926	3.64818	0.109945	0.969515	2.53873	4.93753	3.16842	0.169915	100					104	125	51	284	5		472	30	52
SAVP	6	T	Santorini		Cape Therma 2	69.1	0.61	15.1	3.19	0.13	0.79	2.43	5.15	3.37	0.13	100		69.1	0.61	15.1	3.19	0.13	0.79	2.43	5.15	3.37	0.13	100					11	116	56	316	14		540	23	53
SAVP	6	T	Santorini		Cape Therma 2	69.2	0.62	15.3	3.24	0.08	0.79	2.35	4.93	3.4	0.12	100.03		69.1792	0.619814	15.2954	3.23903	0.079976	0.789763	2.3493	4.92852	3.39898	0.119964	100					113	122	57	327	13		522	17	54
SAVP	6	T	Santorini		Cape Therma 2	69.4	0.62	14.9	2.93	0.12	0.87	2.41	4.99	3.31	0.13	99.68		69.6228	0.62199	14.9478	2.93941	0.120385	0.872793	2.41774	5.00602	3.32063	0.130417	100					104	110	55	299	14		515	37	76
SAVP	6	T	Santorini		Cape Therma 2	69.5	0.64	15.1	3.26	0.13	0.73	2.33	4.74	3.5	0.11	100.04		69.4722	0.639744	15.094	3.2587	0.129948	0.729708	2.32907	4.7381	3.4986	0.109956	100					115	115	54	318	16		523	31	66
SAVP	6	T	Santorini		Cape Therma 2	69.5	0.64	15.4	3.34	0.1	0.82	2.37	4.28	3.44	0.14	100.03		69.4792	0.639808	15.3954	3.339	0.09997	0.819754	2.36929	4.27872	3.43897	0.139958	100					119	119	51	308	14		544	35	79
SAVP	6	T	Santorini		Cape Therma 2	69.5	0.65	15.1	3.32	0.1	0.74	2.17	4.89	3.42	0.12	100.01		69.4931	0.649935	15.0985	3.31967	0.09999	0.739926	2.16978	4.88951	3.41966	0.119988	100					116	111	54	319	12		517	36	36
SAVP	6	T	Santorini		Cape Therma 2	69.6	0.63	15.4	3.29	0.1	0.69	2.31	4.58	3.34	0.11	100.05		69.5652	0.629685	15.3923	3.28836	0.09995	0.689655	2.30885	4.57771	3.33833	0.109945	100					120	118	54	328	15		541	36	78
SAVP	6	T	Santorini		Cape Therma 2	69.9	0.64	14.6	3.36	0.14	0.72	2.18	4.77	3.49	0.13	99.93		69.949	0.640448	14.6102	3.36235	0.140098	0.720504	2.18153	4.77334	3.49244	0.130091	100					108	108	51	302	3		503	34	43
SAVP	4	T	Santorini		Cape Therma 1	60.5	1	16.4	6.88	0.17	2.57	5.8	4.43	2.03	0.21	99.99		60.5061	1.0001	16.4016	6.88069	0.170017	2.57026	5.80058	4.43044	2.0302	0.210021	100					78	197	46	242	11		417	33	32
SAVP	4	T	Santorini		Cape Therma 1	62.5	1.06	16.1	6.27	0.2	2.09	4.83	4.47	2.28	0.22	100.02		62.4875	1.05979	16.0968	6.26875	0.19996	2.08958	4.82903	4.46911	2.27954	0.219956	100					66	210	44	223	8		414	24	70
SAVP	6	T	Santorini		Cape Therma 1	59.3	0.0659722	15.6	6.35	0.17	2.74	8.32	4.49	1.92	0.21	99.166		59.7987	0.0665271	15.7312	6.40341	0.17143	2.76304	8.38997	4.52776	1.93615	0.211766	100					63	195	40	202	11		344	32	40
SAVP	6	T	Santorini		Cape Therma 1	60	0.98	16.4	6.83	0.17	2.97	6.19	4.53	1.8	0.2	100.07		59.958	0.979314	16.3885	6.82522	0.169881	2.96792	6.18567	4.52683	1.79874	0.19986	100					57	207	39	197	12		296	24	27
SAVP	6	T	Santorini		Cape Therma 1	60	0.97	16.4	6.84	0.14	3.07	6.23	4.35	1.82	0.21	100.03		59.982	0.969709	16.3951	6.83795	0.139958	3.06908	6.22813	4.3487	1.81945	0.209937	100					62	203	41	200	9		331	31	61
SAVP	6	T	Santorini		Cape Therma 1	60.1	0.97	16.5	6.59	0.14	3.32	6.43	3.99	1.75	0.19	99.98		60.112	0.970194	16.5033	6.59132	0.140028	3.32066	6.43129	3.9908	1.75035	0.190038	100					62	195	39	202	10		317	24	51
SAVP	6	T	Santorini		Cape Therma 1	60.3	1.03	16.2	6.93	0.15	2.78	5.92	4.54	2	0.16	100.01		60.294	1.0299	16.1984	6.92931	0.149985	2.77972	5.91941	4.53955	1.9998	0.159984	100					71	217	40	207	8		370	27	64
SAVP	6	T	Santorini		Cape Therma 1	60.5	1.01	16.4	6.88	0.17	2.57	5.8	4.43	2.03	0.21	100		60.5	1.01	16.4	6.88	0.17	2.57	5.8	4.43	2.03	0.21	100					66	210	44	223	8		414	24	70
SAVP	6	T	Santorini		Cape Therma 1	60.5	1.03	16.4	5.99	0.16	2.67	5.83	4.61	1.93	0.21	99.33		60.9081	1.03695	16.5106	6.0304	0.161079	2.68801	5.86932	4.6411	1.94302	0.211416	100					71	207	43	223	10		335	24	78
SAVP	6	T	Santorini		Cape Therma 1	60.7	0.98	16.3	6.72	0.16	2.7	5.81	4.43	2.04	0.22	100.06		60.6636	0.979412	16.2902	6.71597	0.159904	2.69838	5.80652	4.42734	2.03878	0.219868	100					71	199	42	232	11		379	23	51
SAVP	6	T	Santorini		Cape Therma 1	60.7	1.04	16.6	6.46	0.12	2.48	5.72	4.82	1.84	0.2	99.98		60.7121	1.04021	16.6033	6.46129	0.120024	2.4805	5.72114	4.82096	1.84037	0.20004	100					62	211	42	225	10		391	16	56
SAVP	6	T	Santorini		Cape Therma 1	61	1.01	16.4	6.75	0.17	2.5	5.65	4.45	1.9	0.2	100.03		60.9817	1.0097	16.3951	6.74798	0.169949	2.49925	5.64831	4.44867	1.89943	0.19994	100					72	204	41	226	8		388	23	41
SAVP	6	T	Santorini		Cape Therma 1	61	1	16.2	6.76	0.13	2.64	5.73	4.29	2.01	0.2	99.96		61.0244	1.0004	16.2065	6.76271	0.130052	2.64106	5.73229	4.29172	2.0108	0.20008	100					72	205	47	216	9		354	31	46
SAVP	6	T	Santorini		Cape Therma 1	61.8	1.09	15.3	6.45	0.14	1.94	5.05	5.35	2.64	0.26	100.02		61.7876	1.08978	15.2969	6.44871	0.139972	1.93961	5.04899	5.34893	2.63947	0.259948	100					92	180	48	247	4		352	23	58
SAVP	6	T	Santorini		Cape Therma 1	62.1	1.06	15.8	6.51	0.18	2.27	4.82	4.84	2.16	0.23	99.97		62.1186	1.06032	15.8047	6.51195	0.180054	2.27068	4.82145	4.84145	2.16065	0.230069	100					70	195	42	232	7		349	17	37
SAVP	6	T	Santorini		Cape Therma 1	62.5	1.06	16.1	6.27	0.2	2.09	4.83	4.47	2.28	0.22	100.02		62.4875	1.05979	16.0968	6.26875	0.19996	2.08958	4.82903	4.46911	2.27954	0.219956	100					78	197	46	242	11		417	33	32
SAVP	2	T	Santorini	T8		68.6	0.49	15.4	3.04		0.51	2.12	4.03	2.96		97.15		70.6125	0.504375	15.8518	3.12918		0.524961	2.18219	4.14822	3.04683		100
SAVP	2	T	Santorini	T7		64.4	0.87	15.7	5.06		1.11	3.15	4.49	2.55		97.33		66.1666	0.893866	16.1307	5.19881		1.14045	3.23641	4.61317	2.61995		100
SAVP	2	T	Santorini	T5		70.2	0.53	15	2.87		0.58	2.02	3.46	3.03		97.69		71.86	0.542533	15.3547	2.93786		0.593715	2.06777	3.54182	3.10165		100
SAVP	2	T	Santorini	T4		66.2	0.5	16	4.13		0.79	3.27	3.35	2.81		97.05		68.2123	0.515198	16.4863	4.25554		0.814013	3.3694	3.45183	2.89541		100
SAVP	2	T	Santorini	T17		64.9	0.98	15.5	6.43		1.38	4.21	2.84	1.84		98.08		66.1705	0.999184	15.8034	6.55587		1.40701	4.29241	2.8956	1.87602		100
SAVP	2	T	Santorini	T16		66.3	0.91	15.9	5.23		1.33	3.44	4.85	2.17		100.13		66.2139	0.908819	15.8794	5.22321		1.32827	3.43553	4.8437	2.16718		100
SAVP	2	T	Santorini	T15		55.7	1.54	15.7	8.47		2.15	5.34	3.75	1.77		94.42		58.9917	1.63101	16.6278	8.97056		2.27706	5.65558	3.97162	1.8746		100
SAVP	2	T	Santorini	T14		65.8	1.01	15.6	5.9		1.51	3.86	4.07	2.29		100.04		65.7737	1.0096	15.5938	5.89764		1.5094	3.85846	4.06837	2.28908		100
SAVP	2	T	Santorini	T13		68.2	0.81	16.7	4.67		1.15	3.37	2.52	2.22		99.64		68.4464	0.812927	16.7603	4.68687		1.15415	3.38218	2.5291	2.22802		100
SAVP	2	T	Santorini	T12		61.4	1.05	17.8	6.58		2.29	6.2	4.05	1.27		100.64		61.0095	1.04332	17.6868	6.53816		2.27544	6.16057	4.02424	1.26192		100
SAVP	2	M	Santorini		Acrotiri	71.5	0.42	14.3	2.9		0.38	1.8	5.7	2.8		99.8		71.6433	0.420842	14.3287	2.90581		0.380762	1.80361	5.71142	2.80561		100
SAVP	2	T	Santorini	I5		72.1	0.46	13.9	2.83		0.41	1.56	4.43	3.14		98.83		72.9536	0.465446	14.0646	2.8635		0.414854	1.57847	4.48244	3.17717		100
SAVP	2	T	Santorini	I2		61.2	1.02	16.8	6.36		1.66	4.65	4.95	1.65		98.29		62.2647	1.03775	17.0923	6.47065		1.68888	4.7309	5.03612	1.67871		100
SAVP	2	T	Santorini	I1		62.7	0.95	15.7	5.56		1.34	3.61	6.67	1.71		98.24		63.8233	0.96702	15.9813	5.65961		1.36401	3.67467	6.7895	1.74064		100
SAVP	3	M	Santorini		?	73.84	0.3	13.22	2.12	0.08	0.28	1.44	4.58	3.13		98.99		74.5934	0.303061	13.3549	2.14163	0.0808162	0.282857	1.45469	4.62673	3.16194		100
SAVP	3	M	Santorini		?	74.31	0.3	13.81	2.02	0.05	0.29	1.42	4.5	3.29		99.99		74.3174	0.30003	13.8114	2.0202	0.050005	0.290029	1.42014	4.50045	3.29033		100
SAVP	8	T	Santorini		Unknown	70.67	0.41	14.16	3.22	0.06	0.42	1.71	4.48	2.66		97.79		72.2671	0.419266	14.48	3.29277	0.061356	0.429492	1.74865	4.58125	2.72011		100				15.5	88	113	42	255	9	3.2	418	30.06	70		33	7.57	1.58		1.1
SAVP	8	T	Santorini		Unknown	71.51	0.59	15	3.57	0.16	0.54	1.89	5.41	2.85		101.52		70.4393	0.581166	14.7754	3.51655	0.157604	0.531915	1.8617	5.329	2.80733		100				14	92	109	42	271	12	3.4	465	31.9	69		33	7.33	1.57		1.1
SAVP	2	T	Yali		Yali C	70.6	0.32	14.1	1.6		0.44	1.94	1.91	3.47		94.38		74.804	0.339055	14.9396	1.69527	0	0.4662	2.05552	2.02373	3.67663		100
SAVP	2	T	Yali		Yali D	74.8	0.11	11.9	0.64		0.05	0.6	1.9	3.8		93.8		79.7441	0.117271	12.6866	0.682303	0	0.0533049	0.639659	2.02559	4.05117		100
SAVP	2	M	Yali	Yali C	Yali Upper Pumice	71.8	0.32	14.4	1.8		0.46	1.8	4.5	3.5		98.58		72.8342	0.324609	14.6074	1.82593	0	0.466626	1.82593	4.56482	3.55042		100
SAVP	3	M	Yali	Yali-C	Yali Upper Pumice	73.62	0.33	13.94	1.89	0.06	0.47	1.95	3.88	3.88		100.02		73.6053	0.329934	13.9372	1.88962	0.059988	0.469906	1.94961	3.87922	3.87922		100
SAVP	3	M	Yali	Yali-C	Yali Upper Pumice	72.83	0.32	14.61	1.83	0	0.47	1.83	4.56	3.55		100		72.83	0.32	14.61	1.83	0	0.47	1.83	4.56	3.55		100
SAVP	3	M	Yali	Yali-C	Yali Upper Pumice	74.79	0.34	14.94	1.69	0	0.47	2.05	2.02	3.68		99.98		74.805	0.340068	14.943	1.69034	0	0.470094	2.05041	2.0204	3.68074		100
SAVP	3	M	Yali	Yali-C	Yali Upper Pumice	73.97	0.33	14.21	1.96	0	0.2	1.78	3.77	3.87		100.09		73.9035	0.329703	14.1972	1.95824	0	0.19982	1.7784	3.76661	3.86652		100
SAVP	9	M	Yali	YAL		73.3	0.3	14.54	1.87	0.05	0.54	1.88	3.74	3.75	0.04	100.01		73.2927	0.29997	14.5385	1.86981	0.049995	0.539946	1.87981	3.73963	3.74963	0.039996	100				17.85	129.94	182.48	21.06	188.26	17.72	4.18	598.81	31.9	53.4	5.26	18.96	3.32	0.61	2.98	0.48	3.44	0.68
SAVP	17	M	Yali	Yali C	Yali Upper Pumice	68.61	0.3393	14.01	1.68	0.0252	0.5065	1.9	4.11	3.68	0.0582	94.9193		72.2825	0.357462	14.7599	1.76992	0.0265489	0.533611	2.0017	4.32999	3.87698	0.0613152	99.9999			37.15	5.34	143.01	218.15	18.12	187.33	21.26	5.28	778.53	36.37	61.79	6.08	20.61	3.49	0.827	2.97	0.456	2.73	0.722
SAVP	17	M	Yali	Yali C	Yali Upper Pumice	68.45	0.3357	13.71	1.67	0.0486	0.471	1.9	4.02	3.63	0.0319	94.2673		72.6127	0.356115	14.5437	1.77156	0.0515555	0.499643	2.01555	4.26447	3.85075	0.0338399	99.9999			34.16	4.21	132.93	205.26	16.65	179.16	20	5.03	720.2	34.75	58.65	5.58	18.89	3.16	0.489	2.66	0.417	2.81	0.574
SAVP	17	M	Yali	Yali C	Yali Upper Pumice	68.47	0.3393	13.86	1.61	0.0699	0.5223	1.88	3.87	3.67	0.0496	94.3412		72.577	0.359652	14.6914	1.70657	0.0740928	0.553629	1.99277	4.10213	3.89013	0.0525751	99.9999			39.48	5.56	137.74	208.99	18.05	184.47	21.3	5	739.89	34.87	59.83	5.95	19.51	3.26	0.678	2.88	0.423	2.93	0.518
SAVP	17	M	Yali	Yali C	Yali Upper Pumice	68.91	0.2823	13.95	1.67	0.0704	0.4832	1.84	4.04	3.61	0.0515	94.9074		72.6076	0.297448	14.6985	1.75961	0.0741776	0.509128	1.93873	4.25678	3.80371	0.0542634	100			28.94	4.52	126.24	200.97	16.21	172	21.14	5.04	701.06	34.48	55.65	5.57	19.3	3.16	0.435	1.94	0.413	2.53	0.532
SAVP	17	M	Yali	Yali C	Yali Upper Pumice	68.82	0.2889	13.96	1.96	0.0776	0.4333	1.9	3.95	3.67	0.0546	95.1145		72.3549	0.303739	14.677	2.06067	0.0815859	0.455556	1.99759	4.15289	3.85851	0.0574045	99.9999			40.83	5.05	152.54	231.65	20.11	207.45	23.25	4.82	852.03	40.76	66.06	6.11	22.49	3.35	0.76	3.2	0.522	3.28	0.728
SAVP	17	M	Yali	Yali C	Yali Upper Pumice	67.72	0.2787	13.65	1.85	0.027	0.4562	1.87	3.89	3.66	0.071	93.473		72.4487	0.298161	14.6031	1.97918	0.0288853	0.488055	2.00058	4.16163	3.91557	0.0759578	99.9999
SAVP	17	M	Yali	Yali C	Yali Upper Pumice	68.09	0.3262	13.56	1.74	0.0244	0.4659	1.84	3.89	3.63	0.0423	93.6088		72.7389	0.348472	14.4858	1.8588	0.0260659	0.49771	1.96563	4.15559	3.87784	0.0451881	100
SAVP	17	M	Yali	Yali C	Yali Upper Pumice	69.01	0.3471	13.97	1.8	0.0373	0.4471	1.89	3.98	3.62	0.0613	95.1629		72.5178	0.364743	14.6801	1.89149	0.0391959	0.469826	1.98607	4.1823	3.804	0.0644159	99.9999
SAVP	17	M	Yali	Yali C	Yali Upper Pumice	69.12	0.2981	13.96	1.82	0.0939	0.477	1.85	4.12	3.71	0.0858	95.5349		72.3505	0.312033	14.6125	1.90506	0.0982887	0.499294	1.93647	4.31256	3.8834	0.0898101	99.9999
SAVP	17	M	Yali	Yali C	Yali Upper Pumice	67.94	0.2873	13.52	1.71	0.0226	0.5315	1.89	3.89	3.65	0.0441	93.4856		72.6743	0.30732	14.4621	1.82916	0.0241748	0.568537	2.0217	4.16107	3.90434	0.047173	99.9999
SAVP	17	M	Yali	Yali C	Yali Upper Pumice	68.38	0.3015	13.88	1.85	0.0092	0.4835	1.86	4.02	3.58	0.0754	94.4396		72.4061	0.319252	14.6972	1.95892	0.00974168	0.511967	1.96951	4.25669	3.79078	0.0798394	100
SAVP	17	M	Yali	Yali C	Yali Upper Pumice	68.79	0.3089	13.79	1.78	0.15	0.4931	1.87	3.91	3.64	0.098	94.8301		72.5403	0.32574	14.5418	1.87704	0.158178	0.519983	1.97195	4.12316	3.83844	0.103343	99.9999
SAVP	17	M	Yali	Yali C	Yali Upper Pumice	65.32	0.2977	13.05	1.62	0.0187	0.3994	1.76	3.24	3.49	0.0472	89.2431		73.1933	0.333583	14.623	1.81527	0.020954	0.447542	1.97214	3.63053	3.91067	0.0528892	99.9999
SAVP	17	M	Yali	Yali C	Yali Upper Pumice	68.72	0.3148	13.82	1.76	0.0589	0.4548	1.76	3.98	3.73	0.0497	94.6483		72.6056	0.3326	14.6014	1.85952	0.0622304	0.480516	1.85952	4.20504	3.94091	0.0525102	99.9999
SAVP	17	M	Yali	Yali C	Yali Upper Pumice	68.61	0.2736	13.6	1.75	0.0724	0.3945	1.74	4.01	3.58	0.0614	94.0919		72.9181	0.29078	14.454	1.85988	0.076946	0.419271	1.84926	4.26179	3.80479	0.0652554	100
SAVP	17	M	Yali	Yali C	Yali Upper Pumice	67.7	0.31	13.64	1.77	0.0935	0.4505	1.78	4.05	3.66	0.0237	93.4777		72.4237	0.33163	14.5917	1.8935	0.100024	0.481933	1.9042	4.33258	3.91537	0.0253536	100
SAVP	17	M	Yali	Yali C	Yali Upper Pumice	68.6	0.3313	13.64	1.71	0.0645	0.4359	1.79	3.97	3.71	0.0702	94.3219		72.7297	0.351244	14.4611	1.81294	0.0683828	0.462141	1.89776	4.20899	3.93334	0.074426	100
SAVP	17	M	Yali	Yali C	Yali Upper Pumice	68.05	0.3177	13.67	1.79	0.0508	0.4378	1.8	4.04	3.69	0.0362	93.8826		72.4841	0.338401	14.5607	1.90664	0.0541101	0.466327	1.91729	4.30325	3.93044	0.0385588	99.9999
SAVP	17	M	Yali	Yali C	Yali Upper Pumice	67.64	0.2857	13.7	1.74	0.057	0.4663	1.81	3.98	3.64	0.0442	93.3632		72.4482	0.306009	14.6739	1.86369	0.0610519	0.499447	1.93867	4.26292	3.89875	0.047342	100
SAVP	17	M	Yali	Yali C	Yali Upper Pumice	67.8	0.3348	13.57	1.93	0.0469	0.4844	1.82	3.95	3.65	0.013	93.5992		72.4365	0.357695	14.498	2.06198	0.0501073	0.517526	1.94446	4.22012	3.89961	0.013889	99.9999
SAVP	17	M	Yali	Yali C	Yali Upper Pumice	69.19	0.3196	13.58	1.57	0.074	0.4614	1.81	3.65	3.69	0.0319	94.377		73.3124	0.338642	14.3891	1.66354	0.0784089	0.48889	1.91784	3.86747	3.90985	0.0338006	99.9999
SAVP	17	M	Yali		Yali 1	71.91	0.1171	11.74	1.0755	0.0453	0.11	0.6151	3.46	4.02	0.0204	93.1135		77.2283	0.12576	12.6083	1.15504	0.0486503	0.118135	0.660592	3.7159	4.31731	0.0219087	99.9999
SAVP	17	M	Yali		Yali 1	70.78	0.0956	11.46	0.9564	0.0549	0.1319	0.665	3	4.22	0.0185	91.3823		77.4548	0.104615	12.5407	1.04659	0.0600773	0.144339	0.727712	3.28291	4.61796	0.0202446	100
SAVP	17	M	Yali		Yali 1	71.05	0.1053	11.33	0.8378	0	0.0783	0.6147	3.12	4.21	0.0284	91.3746		77.7568	0.11524	12.3995	0.916885	0	0.0856912	0.672725	3.41452	4.60741	0.0310808	99.9999
SAVP	17	M	Yali		Yali 1	73.5	0.1235	11.82	0.8218	0.0705	0.129	0.637	3.55	4.03	0	94.6819		77.6284	0.130437	12.4839	0.867959	0.0744598	0.136246	0.672779	3.7494	4.25636	0	99.9999
SAVP	17	M	Yali		Yali 1	74.17	0.1161	11.74	0.9446	0.0893	0.0979	0.6592	3.72	4.17	0	95.7072		77.4968	0.121307	12.2666	0.986969	0.0933054	0.102291	0.688767	3.88685	4.35704	0	99.9999
SAVP	17	M	Yali		Yali 1	73.94	0.1019	11.82	0.9847	0.0602	0.0856	0.6409	3.45	4.08	0.0037	95.1671		77.6949	0.107075	12.4203	1.03471	0.0632572	0.0899471	0.673447	3.6252	4.2872	0.0038879	99.9999
SAVP	17	M	Yali		Yali 1	74.13	0.0626	11.97	0.8871	0.0706	0.0882	0.7102	3.7	3.97	0.0309	95.6197		77.5259	0.0654677	12.5183	0.927738	0.0738342	0.0922404	0.742734	3.8695	4.15186	0.0323155	99.9999
SAVP	17	M	Yali		Yali 1	73.87	0.1023	11.88	1.012	0.0179	0.0947	0.6623	3.6	4.11	0.0111	95.3604		77.464	0.107277	12.458	1.06124	0.0187709	0.0993075	0.694523	3.77515	4.30997	0.0116401	99.9999
SAVP	17	M	Yali		Yali 1	73.4	0.1182	11.81	0.9573	0.0808	0.067	0.6655	3.25	4.48	0	94.8289		77.4026	0.124646	12.454	1.0095	0.0852061	0.0706536	0.70179	3.42723	4.7243	0	99.9999
SAVP	17	M	Yali		Yali 1	73.96	0.096	12.11	0.9649	0.0431	0.0908	0.668	3.72	4.05	0	95.7029		77.2808	0.10031	12.6537	1.00822	0.0450352	0.094877	0.697993	3.88703	4.23185	0	99.9999
SAVP	17	M	Yali		Yali 1	72.98	0.0939	11.68	1.0832	0	0.1222	0.6181	3.64	4.01	0.0395	94.267		77.4184	0.0996107	12.3903	1.14908	0	0.129632	0.655691	3.86137	4.25387	0.0419023	99.9999
SAVP	17	M	Yali		Yali 1	73.49	0.1238	11.76	0.9115	0.0254	0.1042	0.6772	3.66	4.14	0.0068	94.899		77.4402	0.130454	12.3921	0.960495	0.0267653	0.109801	0.713601	3.85673	4.36253	0.00716551	99.9999
SAVP	17	M	Yali		Yali 1	73.65	0.1242	11.82	0.8059	0.0278	0.0997	0.68	3.69	3.99	0.0204	94.9081		77.6014	0.130863	12.4542	0.849137	0.0292915	0.105049	0.716483	3.88797	4.20407	0.0214945	99.9999
SAVP	17	M	Yali		Yali 1	74.05	0.1091	11.97	1.0869	0.0127	0.1036	0.641	3.59	4.02	0.0339	95.6173		77.4441	0.114101	12.5187	1.13672	0.0132821	0.108349	0.670381	3.75455	4.20426	0.0354538	99.9999
SAVP	17	M	Yali		Yali	73.85	0.1201	11.91	0.8463	0.0632	0.0836	0.6776	3.56	4.16	0.013	95.2839		77.5052	0.126044	12.4995	0.888188	0.0663281	0.0877378	0.711138	3.7362	4.3659	0.0136434	99.9999
SAVP	17	M	Yali		Yali	74.35	0.1026	12	0.9988	0	0.1207	0.7086	3.53	4.01	0.0408	95.8616		77.5597	0.107029	12.518	1.04192	0	0.125911	0.739191	3.68239	4.18311	0.0425614	99.9999
SAVP	17	M	Yali		Yali	73.5	0.1743	11.96	1.1117	0.0331	0.1311	0.6967	3.41	4.09	0	95.107		77.2814	0.183267	12.5753	1.16889	0.0348029	0.137845	0.732543	3.58544	4.30042	0	99.9999
SAVP	17	M	Yali		Yali	73.31	0.0728	11.73	0.869	0.1233	0.0854	0.6249	3.17	4.17	0.0222	94.1777		77.8422	0.0773007	12.4552	0.922724	0.130923	0.0906796	0.663533	3.36598	4.4278	0.0235725	99.9999
SAVP	17	M	Yali		Yali	73.41	0.1548	11.84	1.0101	0.0039	0.1195	0.7867	3.57	4	0.0216	94.9167		77.3415	0.16309	12.4741	1.0642	0.00410887	0.1259	0.828832	3.76119	4.21422	0.0227568	99.9999
SAVP	17	M	Yali		Yali	73.63	0.1095	12.05	0.8869	0.0148	0.1359	0.7101	3.6	4.06	0.0345	95.2318		77.3166	0.114983	12.6533	0.931307	0.015541	0.142704	0.745654	3.78025	4.26328	0.0362274	99.9999
SAVP	17	M	Yali		Yali	73.35	0.1356	12	1.1072	0.0541	0.0922	0.7665	3.56	4.17	0.0475	95.2831		76.9811	0.142313	12.594	1.16201	0.0567782	0.0967643	0.804445	3.73623	4.37643	0.0498514	100
SAVP	17	M	Yali		Yali	74.51	0.1501	11.81	1.0316	0.1072	0.1513	0.7414	2.76	4.12	0.0019	95.3836		78.1162	0.157365	12.3816	1.08153	0.112388	0.158623	0.777282	2.89358	4.3194	0.00199196	99.9999
SAVP	17	M	Yali		Yali	74.51	0.1346	12.02	0.8508	0.088	0.1015	0.7089	1.94	4.1	0.021	94.4749		78.8675	0.142472	12.723	0.900557	0.0931464	0.107436	0.750358	2.05346	4.33978	0.0222281	99.9999
SAVP	17	M	Yali		Yali	73.54	0.1194	11.94	0.9537	0.1067	0.1399	0.7604	3.52	4.19	0.0419	95.3121		77.157	0.125273	12.5273	1.00061	0.111948	0.146781	0.7978	3.69313	4.39608	0.0439608	99.9999
SAVP	17	M	Yali		Yali	73.49	0.1174	12.13	1.036	0	0.1199	0.709	3.39	4.22	0.0327	95.2451		77.1588	0.123261	12.7356	1.08772	0	0.125886	0.744395	3.55924	4.43067	0.0343325	99.9999
SAVP	17	M	Yali		Yali	73.68	0.0833	11.72	0.9284	0.0457	0.0876	0.6608	3.65	4.04	0.0111	94.907		77.6339	0.0877701	12.3489	0.978221	0.0481524	0.0923009	0.696261	3.84587	4.2568	0.0116957	99.9999
SAVP	17	M	Yali		Yali	72.04	0.1105	12.05	0.9289	0.0441	0.0736	0.6437	3.67	4.08	0	93.6409		76.9322	0.118004	12.8683	0.991981	0.0470948	0.0785981	0.687413	3.91923	4.35707	0	99.9999			47.54	3.92	143.93	59.66	15.62	94.58	19.6	5.04	878.55	35.8	64.4	6.06	18.27	2.99	0.305	2.48	0.419	2.42	0.547
SAVP	17	M	Yali		Yali	72.93	0.1115	11.69	0.7956	0.0187	0.0785	0.6563	3.52	4.27	0	94.0707		77.5268	0.118528	12.4268	0.845747	0.0198787	0.0834479	0.697667	3.74187	4.53914	0	99.9999			51.9	3.62	137.04	59.68	15.33	94.05	18.42	4.62	869.4	35.64	64.61	5.74	18.26	2.9	0.307	2.1	0.355	2.39	0.459
SAVP	17	M	Yali		Yali	73.95	0.1183	11.76	1.1478	0	0.1016	0.6542	3.6	4.11	0	95.442		77.4816	0.12395	12.3216	1.20262	0	0.106452	0.685442	3.77192	4.30628	0	99.9999			44.52	3.75	139.07	58.79	15	91.79	17.47	5	851.95	35.47	65.25	5.78	17.15	3.07	0.324	2.29	0.331	2.48	0.48
SAVP	17	M	Yali		Yali	73.95	0.1099	11.99	0.7649	0.0602	0.0822	0.6163	3.5	4.13	0.0173	95.2209		77.6615	0.115416	12.5918	0.80329	0.0632214	0.0863256	0.647232	3.67566	4.33728	0.0181683	99.9999			45.87	3.72	156.22	62.74	16.53	101.69	20.13	5.35	961.95	38.91	70.47	6.2	18.77	2.67	0.353	1.86	0.393	2.85	0.485
SAVP	17	M	Yali		Yali	73.6	0.1128	11.86	0.753	0.068	0.1243	0.6452	3.61	4.12	0.0049	94.8983		77.5567	0.118864	12.4976	0.793481	0.0716557	0.130982	0.679886	3.80407	4.34149	0.00516342	99.9999			46.18	4.17	151.25	63.5	16.31	99.12	20.15	5.44	951.22	39.56	67.39	6.41	20.38	2.42	0.322	2.51	0.463	2.46	0.516
SAVP	17	M	Yali		Yali	73.81	0.0919	11.89	0.8594	0.0092	0.1263	0.6174	3.68	4.11	0	95.1943		77.5362	0.0965394	12.4902	0.902785	0.00966444	0.132676	0.648568	3.86578	4.31749	0	99.9999
SAVP	17	M	Yali		Yali	73.62	0.1352	12.05	1.0349	0.0614	0.1126	0.831	3.65	3.94	0.0105	95.4457		77.1329	0.141651	12.625	1.08428	0.0643298	0.117973	0.870652	3.82416	4.128	0.011001	99.9999
SAVP	17	M	Yali		Yali	73.56	0.1253	11.8	1.0073	0.0339	0.1041	0.6163	3.54	4.06	0.0093	94.8563		77.5489	0.132095	12.4399	1.06192	0.0357383	0.109745	0.64972	3.73196	4.28016	0.0098043	99.9999
SAVP	17	M	Yali		Yali	74.34	0.1267	12.05	0.8781	0.0627	0.0402	0.6199	3.71	4.21	0.0123	96.05		77.3972	0.13191	12.5455	0.914211	0.0652785	0.0418532	0.645393	3.86257	4.38313	0.0128058	99.9999
SAVP	17	M	Yali		Yali	72.69	0.138	11.7	0.8728	0.0597	0.0862	0.6766	3.45	4.27	0.0099	93.9533		77.3682	0.146881	12.453	0.928972	0.0635422	0.0917477	0.720145	3.67204	4.54481	0.0105371	99.9999
SAVP	17	M	Yali		Yali	74.12	0.1306	11.83	0.9679	0.0935	0.1259	0.6666	3.61	4.06	0	95.6046		77.5277	0.136604	12.3739	1.0124	0.0977986	0.131688	0.697247	3.77597	4.24666	0	99.9999
SAVP	17	M	Yali		Yali	73.35	0.115	11.72	1.1207	0.067	0.0838	0.6326	3.58	4.04	0	94.7092		77.4476	0.121424	12.3747	1.18331	0.0707429	0.0884814	0.667939	3.77999	4.26569	0	99.9999
SAVP	17	M	Yali		Yali	73.47	0.1051	11.9	0.9715	0.0448	0.0888	0.6495	3.56	4.3	0.0049	95.0947		77.2598	0.110521	12.5138	1.02161	0.0471109	0.0933806	0.683003	3.74364	4.52181	0.00515276	99.9999
SAVP	17	M	Yali		Yali	73.54	0.1474	11.73	0.9953	0.0292	0.076	0.6314	3.61	4.26	0.0234	95.0428		77.3757	0.155088	12.3418	1.04721	0.030723	0.079964	0.664332	3.79829	4.48219	0.0246205	99.9999
SAVP	17	M	Yali		Yali	73.82	0.1068	11.62	0.9376	0.0503	0.1154	0.6104	3.6	4.17	0.0005	95.0311		77.6798	0.112384	12.2276	0.986624	0.05293	0.121434	0.642316	3.78823	4.38804	0.000526144	99.9999
SAVP	17	M	Yali		Yali	73.29	0.1338	11.61	0.8565	0.0583	0.0575	0.6311	3.62	4.19	0	94.4473		77.5988	0.141666	12.2926	0.906855	0.0617275	0.0608805	0.668203	3.83283	4.43634	0	99.9999
SAVP	17	M	Yali		Yali	73.66	0.1095	11.62	0.8602	0.0786	0.1049	0.5861	3.6	4.13	0.0011	94.7505		77.741	0.115567	12.2638	0.907858	0.0829547	0.110712	0.618572	3.79945	4.35882	0.00116094	99.9999
SAVP	17	M	Yali		Yali	73.32	0.0763	11.59	0.906	0	0.1063	0.6228	3.56	4.27	0.0033	94.4548		77.6244	0.0807794	12.2704	0.959189	0	0.112541	0.659363	3.769	4.52068	0.00349373	99.9999
SAVP	17	M	Yali		Yali	69.85	0.1198	11.06	0.9706	0.0411	0.1133	0.5924	3.47	4.12	0.0081	90.3453		77.3145	0.132602	12.2419	1.07432	0.0454921	0.125408	0.655706	3.84082	4.56028	0.0089656	100
SAVP	17	M	Yali		Yali	74.49	0.1051	11.81	0.9266	0.0644	0.1101	0.6113	3.62	4.11	0	95.8475		77.7172	0.109653	12.3217	0.966744	0.0671901	0.11487	0.637784	3.77683	4.28806	0	100
SAVP	17	M	Yali		Yali	73.8	0.1139	11.79	0.9715	0.078	0.0633	0.631	3.54	4.25	0	95.2378		77.4902	0.119595	12.3795	1.02008	0.0819003	0.0664652	0.662552	3.71701	4.46251	0	99.9999
SAVP	17	M	Yali		Yali	73.5	0.0972	11.7	0.9869	0.0158	0.1117	0.6111	3.8	4.22	0.05	95.0928		77.2929	0.102216	12.3038	1.03783	0.0166153	0.117464	0.642635	3.9961	4.43777	0.0525802	99.9999
SAVP	17	M	Yali		Yali	73.93	0.0832	11.68	0.9525	0.0399	0.1006	0.6201	3.61	4.29	0.0033	95.3097		77.5682	0.0872944	12.2548	0.999374	0.0418635	0.105551	0.650616	3.78765	4.50112	0.0034624	99.9999
SAVP	17	M	Yali		Yali	73.01	0.0952	11.7	0.9362	0.0284	0.1055	0.6274	3.46	4.15	0.0016	94.1143		77.5759	0.101154	12.4317	0.994748	0.0301761	0.112098	0.666636	3.67638	4.40953	0.00170006	100
SAVP	17	M	Yali		Yali	75.98	0.1081	12.27	0.8558	0.0687	0.0938	0.7227	3.71	4.21	0.0043	98.0235		77.512	0.11028	12.5174	0.873056	0.0700852	0.0956913	0.737272	3.78481	4.29489	0.0043867	99.9999
SAVP	17	M	Yali		Yali	76.17	0.1346	12.34	0.9018	0	0.1066	0.6784	3.88	4.14	0	98.3514		77.4468	0.136856	12.5468	0.916916	0	0.108387	0.689772	3.94504	4.2094	0	100
SAVP	17	M	Yali		Yali	75.74	0.081	12.28	1.0492	0	0.1164	0.6539	3.94	4.21	0.008	98.0786		77.2238	0.0825868	12.5206	1.06975	0	0.11868	0.66671	4.01719	4.29248	0.00815672	99.9999
SAVP	17	M	Yali		Yali	75.49	0.0985	12.26	1.0776	0.0231	0.0505	0.6712	3.93	4.18	0.0092	97.7902		77.1959	0.100726	12.537	1.10195	0.023622	0.0516412	0.686367	4.01881	4.27446	0.0094079	99.9999
SAVP	17	M	Yali		Yali	75.38	0.123	12.08	0.979	0.0085	0.1271	0.6534	3.73	4.16	0.0389	97.2799		77.4877	0.126439	12.4178	1.00637	0.00873767	0.130654	0.67167	3.8343	4.27632	0.0399877	100
SAVP	17	M	Yali		Yali	75.05	0.107	12.18	0.9429	0.1005	0.0685	0.6711	4.01	4.2	0.0055	97.3356		77.1044	0.109929	12.5134	0.96871	0.103251	0.0703751	0.68947	4.11977	4.31497	0.00565055	99.9999
SAVP	17	M	Yali		Yali	75.82	0.1068	12.44	0.6573	0.0249	0.0854	0.6803	3.91	4.16	0.0111	97.8959		77.4496	0.109095	12.7074	0.671428	0.0254352	0.0872355	0.694922	3.99404	4.24941	0.0113386	99.9999
SAVP	17	M	Yali		Yali	75.73	0.1261	12.11	0.7992	0	0.0664	0.6483	3.88	4.12	0.0161	97.4962		77.6748	0.129338	12.421	0.819724	0	0.0681052	0.664949	3.97964	4.22581	0.0165135	99.9999
SAVP	17	M	Yali		Yali	75.9	0.1313	12.25	1.0437	0.0767	0.0787	0.6522	3.82	4.15	0.0296	98.1323		77.3446	0.133799	12.4831	1.06356	0.0781598	0.0801979	0.664613	3.8927	4.22898	0.0301634	99.9999
SAVP	17	M	Yali		Yali	75.69	0.0935	11.95	0.8912	0.1097	0.1092	0.6404	3.88	4.16	0.0333	97.5574		77.5851	0.095841	12.2492	0.913513	0.112447	0.111934	0.656434	3.97715	4.26416	0.0341338	99.9999
SAVP	17	M	Yali		Yali	75.46	0.1021	12.2	0.9637	0.0339	0.0697	0.6707	4.05	4.21	0.0234	97.7835		77.1705	0.104414	12.4765	0.985545	0.0346684	0.0712799	0.685903	4.1418	4.30543	0.0239304	100
SAVP	17	M	Yali		Yali	76.09	0.1014	12.25	0.9871	0.0844	0.1002	0.6781	3.78	4.12	0.0203	98.2115		77.4757	0.103247	12.4731	1.00508	0.085937	0.102025	0.690449	3.84884	4.19503	0.0206697	100
SAVP	17	M	Yali		Yali	75.18	0.1256	12.16	0.6613	0.0014	0.0694	0.6469	3.77	4.18	0.0012	96.7959		77.6686	0.129758	12.5625	0.68319	0.00144634	0.0716973	0.668313	3.89479	4.31836	0.00123972	99.9999
SAVP	17	M	Yali		Yali	75.55	0.1067	12.09	1.0398	0.0544	0.0908	0.6429	3.86	4.15	0.0105	97.5951		77.4117	0.109329	12.3879	1.06542	0.0557405	0.0930375	0.658742	3.95512	4.25226	0.0107587	100
SAVP	17	M	Yali		Yali	75.55	0.121	12.16	0.9414	0.0101	0.0787	0.6856	3.98	4.21	0.0043	97.7412		77.296	0.123796	12.441	0.963156	0.0103334	0.0805188	0.701444	4.07198	4.30729	0.00439937	99.9999
SAVP	11	T	Nisyros		Upper Pumice	76.9106	0.210063	12.5787	1.31155	0.0263129	0.15955	0.948664	3.31214	4.28981	0.0378006	99.7853		77.0762	0.210515	12.6058	1.31437	0.0263695	0.159893	0.950706	3.31927	4.29905	0.037882	100
SAVP	11	T	Nisyros		Upper Pumice	76.7982	0.218581	12.6528	1.44415	0.0636768	0.146146	0.942623	3.24224	4.30114	0.00388524	99.8134		76.9418	0.218989	12.6764	1.44685	0.0637959	0.146419	0.944386	3.24831	4.30918	0.00389251	100					144.49	90.7574	17.5115	147.47	18.9264		877.746	37.6662	66.1056	6.15896	20.2461	3.26744	0.390045	2.54673		2.85681
SAVP	11	T	Nisyros		Upper Pumice	77.0232	0.223076	12.4511	1.22913	0.0581369	0.149007	0.892229	3.27128	4.39014	0.0158694	99.7032		77.2525	0.22374	12.4882	1.23279	0.0583099	0.149451	0.894885	3.28102	4.40321	0.0159166	100
SAVP	11	T	Nisyros		Upper Pumice	76.9532	0.248864	12.6619	1.19496	0.0509143	0.153465	0.951921	3.25896	4.26372	0.0510875	99.789		77.1159	0.24939	12.6887	1.19748	0.051022	0.153789	0.953933	3.26585	4.27273	0.0511955	100
SAVP	11	T	Nisyros		Upper Pumice	76.9211	0.184648	12.5612	1.29767	0.0314181	0.169223	0.976257	3.2358	4.37524	0.0148715	99.7673		77.1004	0.185079	12.5905	1.30069	0.0314914	0.169617	0.978534	3.24334	4.38544	0.0149062	100
SAVP	11	T	Nisyros		Upper Pumice	77.0857	0.237383	12.4156	1.2433	0.0211406	0.164712	0.94126	3.34893	4.31145	0.0243093	99.7938		77.245	0.237874	12.4412	1.24587	0.0211843	0.165052	0.943205	3.35585	4.32036	0.0243595	100					147.591	89.6132	17.003	143.998	17.819		854.088	35.8771	63.7306	5.95835	19.4844	3.6952	0.398494	2.97262		2.57417
SAVP	11	T	Nisyros		Upper Pumice	76.827	0.228383	12.627	1.3153	0.0401303	0.166997	0.941525	3.3281	4.29276	0.00437251	99.7716		77.0029	0.228906	12.6559	1.31831	0.0402222	0.167379	0.94368	3.33572	4.30259	0.00438253	100					144.938	92.7909	18.3528	153.495	19.3595		924.133	39.0261	69.3197	6.30762	22.0067	3.36152	0.408165	2.95032		2.95739
SAVP	11	T	Nisyros		Upper Pumice	77.2204	0.231517	12.3818	1.23871	0.0118024	0.143691	0.930795	3.22931	4.367	0.0297031	99.7847		77.387	0.232017	12.4085	1.24138	0.0118279	0.144001	0.932803	3.23628	4.37642	0.0297672	100					148.068	92.9224	18.6833	158.555	19.8372		930.045	39.316	69.7611	6.5222	22.0118	3.80942	0.402039	2.81007		2.97633
SAVP	11	T	Nisyros		Upper Pumice	76.9109	0.245204	12.4745	1.44677	0.0747172	0.160159	0.906247	3.33193	4.20682	0.0441454	99.8013		77.064	0.245692	12.4993	1.44965	0.0748659	0.160478	0.908051	3.33857	4.21519	0.0442333	100
SAVP	11	T	Nisyros		Upper Pumice	77.1372	0.219608	12.4161	1.23942	0.0405207	0.164965	0.925166	3.27451	4.35175	0.0143838	99.7836		77.3044	0.220084	12.4431	1.24211	0.0406086	0.165322	0.927172	3.28161	4.36119	0.014415	100					150.961	85.981	16.9275	145.604	18.378		879.093	35.719	65.0712	5.75471	18.8854	2.66564	<LOD	<LOD		2.57546
SAVP	11	T	Nisyros		Upper Pumice	77.3572	0.24585	12.3468	1.15465	0.0223088	0.164569	0.898375	3.30165	4.28922	0.0199715	99.8005		77.5118	0.246341	12.3714	1.15696	0.0223534	0.164898	0.900171	3.30825	4.29779	0.0200115	100					145.436	81.0371	16.2049	140.443	19.5507		838.473	34.4792	63.4733	5.5714	18.0518	3.69051	<LOD	2.48337		2.47923
SAVP	11	T	Nisyros		Upper Pumice	77.2586	0.259928	12.4085	1.15194	0.0238328	0.162109	0.926028	3.27942	4.2892	0.0438059	99.8034		77.4108	0.26044	12.433	1.15421	0.0238798	0.162428	0.927852	3.28589	4.29765	0.0438922	100					146.049	86.3633	17.1967	145.546	18.5783		853.166	35.1567	65.0453	5.99595	21.2059	3.19145	0.324844	2.93769		2.80431
SAVP	11	T	Nisyros		Upper Pumice	76.9904	0.214923	12.4744	1.31855	0.0323649	0.161475	0.941091	3.31524	4.29417	0.0552581	99.7979		77.1463	0.215359	12.4997	1.32122	0.0324304	0.161802	0.942997	3.32196	4.30287	0.05537	100					142.826	95.0463	16.7361	148.188	19.1176		884.913	36.2201	63.7971	6.00855	20.7991	3.14208	0.441227	2.58047		2.54754
SAVP	11	T	Nisyros		Upper Pumice	76.7936	0.189561	12.7903	1.19576	0.0160681	0.154589	0.964293	3.23902	4.46975	0	99.8129		76.9375	0.189916	12.8142	1.198	0.0160982	0.154879	0.9661	3.2451	4.47813	0	100					156.478	89.1717	17.1903	148.058	19.6366		873.147	37.2829	67.0224	6.24899	20.0299	<LOD	<LOD	2.41882		2.743
SAVP	11	T	Nisyros		Upper Pumice	77.1926	0.200477	12.4168	1.30245	0.00489674	0.165727	0.918165	3.31602	4.28253	0.0124749	99.8122		77.3378	0.200854	12.4402	1.30491	0.00490595	0.166038	0.919892	3.32226	4.29059	0.0124983	100					154.108	88.3967	18.1042	141.594	18.7612		874.756	36.1374	65.2419	6.29091	22.0143	3.0767	<LOD	<LOD		2.73162
SAVP	11	T	Nisyros		Upper Pumice	77.1114	0.271509	12.4093	1.26202	0.00345272	0.193143	1.00076	3.29211	4.24402	0.0131123	99.8008		77.2653	0.272051	12.434	1.26454	0.00345961	0.193528	1.00276	3.29868	4.25249	0.0131384	100
SAVP	11	T	Nisyros		Upper Pumice	77.3216	0.205149	12.3522	1.21672	0.0440914	0.145044	0.93712	3.28399	4.2787	0.0104247	99.7951		77.4804	0.20557	12.3775	1.21921	0.044182	0.145342	0.939045	3.29074	4.28749	0.0104461	100					145.983	93.9186	18.0663	155.888	19.1684		915.466	38.909	68.6495	6.26067	20.211	3.32981	0.443021	2.88893		2.90167
SAVP	11	T	Nisyros		Upper Pumice	77.2205	0.226239	12.2619	1.28951	0.0488598	0.165587	0.932106	3.298	4.31841	0.0237856	99.785		77.3869	0.226727	12.2884	1.29229	0.0489651	0.165944	0.934115	3.30511	4.32772	0.0238369	100					156.643	105.576	17.8539	153.921	18.5168		909.687	37.6489	67.5825	6.32372	20.0357	3.46039	<LOD	3.16887		2.815
SAVP	11	T	Nisyros		Upper Pumice	76.9218	0.250045	12.4588	1.35533	0.0475484	0.174627	0.972303	3.28077	4.29749	0.0397639	99.7985		77.0772	0.25055	12.4839	1.35807	0.0476444	0.174979	0.974266	3.2874	4.30617	0.0398442	100					142.29	86.3407	15.5474	141.746	18.2046		845.583	35.9705	63.3394	5.76955	20.5094	<LOD	0.406923	<LOD		2.44666
SAVP	11	T	Nisyros		Upper Pumice	76.9838	0.234063	12.5715	1.24499	0.0341814	0.160595	0.916939	3.35604	4.28956	0.00887532	99.8006		77.1377	0.234531	12.5966	1.24748	0.0342497	0.160916	0.918771	3.36274	4.29813	0.00889306	100					140.157	94.6753	17.7616	155.005	18.4948		883.751	37.7675	67.3219	6.33159	20.0955	3.28866	0.421828	2.83082		2.90518
SAVP	11	T	Nisyros		Upper Pumice	76.97	0.213624	12.6003	1.20908	0.0511125	0.1501	0.930639	3.19425	4.42263	0.0284727	99.7703		77.1473	0.214116	12.6293	1.21186	0.0512302	0.150446	0.932782	3.20161	4.43281	0.0285382	100
SAVP	11	T	Nisyros		Upper Pumice	76.8453	0.248838	12.1512	1.58353	0.127029	0.208861	0.942537	3.20327	4.43556	0.0145644	99.7607		77.0296	0.249435	12.1804	1.58732	0.127333	0.209362	0.944798	3.21095	4.4462	0.0145994	100					150.99	95.3688	17.4794	156.337	19.2857		919.868	39.4534	68.9462	6.51088	20.4826	3.22066	0.445486	2.91178		2.86037
SAVP	11	T	Nisyros		Upper Pumice	76.9864	0.23751	12.4621	1.28864	0.0256633	0.17795	0.981985	3.24611	4.38933	0.0078166	99.8034		77.138	0.237978	12.4866	1.29118	0.0257139	0.1783	0.983919	3.25251	4.39797	0.007832	100					147.228	100.747	18.702	166.609	19.3312		894.537	41.16	68.5693	7.04134	23.4687	3.16267	0.49046	2.6865		2.88823
SAVP	11	T	Nisyros		Upper Pumice	76.8042	0.224815	12.4808	1.33044	0.0800661	0.163414	0.965825	3.38712	4.34956	0.00784702	99.7941		76.9627	0.225278	12.5066	1.33318	0.0802313	0.163751	0.967818	3.39411	4.35854	0.00786322	100					152.857	87.7746	16.5159	164.671	19.5704		816.375	36.6089	66.4159	6.51893	22.2755	<LOD	<LOD	<LOD		2.52531
SAVP	11	T	Nisyros		Upper Pumice	77.3947	0.209628	12.2179	1.22031	0.0319985	0.157989	0.920528	3.21833	4.39018	0.0420372	99.8036		77.547	0.21004	12.2419	1.22271	0.0320615	0.1583	0.922339	3.22466	4.39882	0.0421199	100					151.08	88.808	16.6503	147.428	18.5786		843.107	36.688	65.0539	5.87574	18.5511	<LOD	<LOD	<LOD		2.73862
SAVP	11	T	Nisyros		Upper Pumice	76.8253	0.271792	12.6607	1.29929	0.0215775	0.16251	0.950679	3.24873	4.31022	0.0638877	99.8146		76.9679	0.272296	12.6842	1.3017	0.0216176	0.162812	0.952444	3.25477	4.31822	0.0640064	100					147.885	97.6564	18.2096	159.147	19.3304		878.055	38.1603	66.576	6.76755	22.2954	3.44404	0.424524	3.079		2.8413
SAVP	11	T	Nisyros		Upper Pumice	76.8492	0.259154	12.491	1.34363	0.0108862	0.178466	0.977766	3.28334	4.37568	0.0286482	99.7978		77.0049	0.259679	12.5163	1.34635	0.0109082	0.178827	0.979747	3.29	4.38455	0.0287062	100					149.893	98.7129	17.6999	160.163	19.129		891.785	37.4091	66.9357	6.28318	22.7455	3.77563	0.426257	2.31385		2.60114
SAVP	11	T	Nisyros		Upper Pumice	77.1314	0.249706	12.243	1.30362	0.0654645	0.182814	0.985841	3.29832	4.30263	0.0329617	99.7958		77.2893	0.250218	12.2681	1.30629	0.0655985	0.183188	0.987858	3.30507	4.31143	0.0330291	100					148.108	98.6099	17.5905	157.998	18.5537		891.664	38.1062	66.4802	6.23988	21.1104	3.26712	0.447954	<LOD		2.80231
SAVP	11	T	Nisyros		Upper Pumice	77.3263	0.250505	12.2781	1.11596	0.0858908	0.159259	0.960027	3.29652	4.31541	0.00844358	99.7964		77.484	0.251017	12.3032	1.11823	0.0860661	0.159584	0.961986	3.30325	4.32421	0.00846081	100					149.026	92.8929	18.8017	159.396	19.4163		916.403	39.5025	69.0489	6.62545	22.3665	3.64014	0.436519	2.78183		2.87813
SAVP	11	T	Nisyros		Upper Pumice	77.1242	0.235286	12.1447	1.32346	0.0500662	0.168006	0.965818	3.30976	4.4134	0.0356943	99.7704		77.3017	0.235827	12.1726	1.3265	0.0501815	0.168393	0.968041	3.31738	4.42355	0.0357764	100
SAVP	11	T	Nisyros		Upper Pumice	77.0619	0.263392	12.2261	1.36624	0.025579	0.163125	1.02462	3.39813	4.24814	0.016158	99.7934		77.2214	0.263937	12.2514	1.36907	0.0256319	0.163463	1.02675	3.40517	4.25693	0.0161915	100
SAVP	11	T	Nisyros		Upper Pumice	77.3379	0.26603	12.0753	1.41479	0.015899	0.181456	0.950178	3.28382	4.26206	0.0135508	99.801		77.4921	0.266561	12.0994	1.41761	0.0159307	0.181818	0.952073	3.29037	4.27056	0.0135778	100
SAVP	11	T	Nisyros		Upper Pumice	77.419	0.233616	11.9885	1.23958	0.0604867	0.178534	0.95402	3.31175	4.41092	0.0161379	99.8125		77.5644	0.234055	12.011	1.24191	0.0606003	0.178869	0.955812	3.31797	4.4192	0.0161682	100
SAVP	11	T	Nisyros		Upper Pumice	77.4453	0.224995	12.1188	1.28913	0.0369767	0.164842	0.916869	3.19906	4.38884	0.0193658	99.8041		77.5973	0.225437	12.1425	1.29166	0.0370493	0.165165	0.918668	3.20533	4.39745	0.0194038	100
SAVP	11	T	Nisyros		Upper Pumice	77.2881	0.235045	12.2036	1.29773	0.0199569	0.155031	0.922384	3.25778	4.36066	0.0351166	99.7754		77.4621	0.235574	12.2311	1.30065	0.0200019	0.15538	0.92446	3.26511	4.37048	0.0351957	100					152.46	95.4882	17.3818	153.091	18.9607		909.888	37.8414	67.5866	6.18394	20.736	3.59113	0.370514	2.959		2.86152
SAVP	11	T	Nisyros		Upper Pumice	77.2864	0.264926	12.1412	1.12686	0.0237193	0.186222	0.921743	3.27717	4.53659	0.0319709	99.7967		77.4438	0.265466	12.1659	1.12915	0.0237676	0.186601	0.92362	3.28385	4.54583	0.032036	100
SAVP	11	T	Nisyros		Upper Pumice	77.1083	0.244573	12.3008	1.33776	0	0.18063	0.94782	3.26056	4.39548	0.0457012	99.8216		77.2461	0.24501	12.3228	1.34015	0	0.180952	0.949514	3.26638	4.40334	0.0457829	100
SAVP	11	T	Nisyros		Upper Pumice	76.8279	0.232575	12.3268	1.27344	0.0439306	0.181208	0.998766	3.25268	4.46842	0.0899243	99.6956		77.0624	0.233285	12.3645	1.27733	0.0440647	0.181761	1.00182	3.26261	4.48206	0.0901988	100
SAVP	11	T	Nisyros		Upper Pumice	76.9884	0.275934	12.3645	1.35977	0.0399131	0.195165	1.00212	3.31132	4.26797	0.0251746	99.8302		77.1193	0.276404	12.3855	1.36208	0.0399809	0.195497	1.00383	3.31695	4.27523	0.0252174	100
SAVP	11	T	Nisyros		Upper Pumice	77.4376	0.224176	12.2159	1.1333	0.0131899	0.176932	0.944531	3.23508	4.39048	0.019249	99.7905		77.6002	0.224647	12.2416	1.13568	0.0132176	0.177304	0.946514	3.24188	4.3997	0.0192894	100					149.512	94.8544	18.1277	158.003	19.4011		917.751	38.686	69.5377	6.33989	21.5503	3.58261	0.426828	3.09735		2.80465
SAVP	11	T	Nisyros		Upper Pumice	77.2421	0.185147	12.1376	1.29029	0.0994319	0.158768	0.932982	3.33072	4.38002	0.0226014	99.7797		77.4127	0.185555	12.1644	1.29314	0.0996514	0.159119	0.935042	3.33807	4.38969	0.0226513	100
SAVP	11	T	Nisyros		Upper Pumice	77.4187	0.178029	12.1417	1.32653	0.0333566	0.155228	0.942227	3.24793	4.32644	0.0370874	99.8072		77.5683	0.178373	12.1651	1.32909	0.033421	0.155528	0.944047	3.2542	4.3348	0.0371591	100
SAVP	11	T	Nisyros		Upper Pumice	77.6773	0.220543	12.0055	1.26066	0.0197754	0.162841	0.928318	3.19497	4.29873	0.0224471	99.7911		77.8399	0.221005	12.0306	1.2633	0.0198168	0.163181	0.930261	3.20166	4.30772	0.022494	100
SAVP	11	T	Nisyros		Upper Pumice	77.2441	0.277728	12.1527	1.34517	0.0725116	0.162618	1.02135	3.16353	4.30696	0.0447828	99.7915		77.4055	0.278309	12.1781	1.34798	0.0726631	0.162958	1.02348	3.17014	4.31596	0.0448764	100
SAVP	11	T	Nisyros		Upper Pumice	77.4977	0.205555	12.0578	1.23356	0.055366	0.148506	0.921404	3.21158	4.42671	0.0142485	99.7724		77.6745	0.206024	12.0853	1.23637	0.0554923	0.148845	0.923506	3.2189	4.43681	0.014281	100
SAVP	11	T	Nisyros		Upper Pumice	77.551	0.222265	11.9254	1.26196	0.0358389	0.170663	0.981473	3.28666	4.33369	0.0306432	99.7995		77.7067	0.222712	11.9493	1.2645	0.0359108	0.171006	0.983444	3.29326	4.3424	0.0307047	100					151.655	99.1503	18.4912	158.54	19.2048		945.313	40.4054	70.5797	6.50322	21.3175	3.05108	0.423046	2.81241		2.99889
SAVP	11	T	Nisyros		Upper Pumice	77.5689	0.205763	12.0543	1.26269	0.0241584	0.151763	0.857218	3.25389	4.41363	0.0284875	99.8209		77.7081	0.206133	12.076	1.26495	0.0242018	0.152035	0.858756	3.25973	4.42155	0.0285387	100					148.909	83.0804	16.3134	141.174	19.0218		829.484	35.4181	63.3198	5.9313	19.5182	3.19048	0.393343	3.19781		2.57044
SAVP	11	T	Nisyros		Upper Pumice	77.5138	0.195302	12.1394	1.27963	0.0142363	0.178723	0.924685	3.2156	4.32704	0.0293179	99.8177		77.6554	0.195659	12.1615	1.28196	0.0142623	0.17905	0.926374	3.22147	4.33494	0.0293715	100					149.567	96.4981	18.6247	158.644	20.0489		927.635	39.5031	68.515	6.2817	21.0791	3.6659	0.44886	2.97666		3.01717
SAVP	11	T	Nisyros		Upper Pumice	77.447	0.240006	12.07	1.26538	0.0250436	0.167699	0.923357	3.30488	4.31525	0.0266802	99.7853		77.6136	0.240523	12.096	1.2681	0.0250975	0.16806	0.925344	3.31199	4.32453	0.0267376	100					150.666	94.3222	18.0584	156.818	19.8959		917.324	38.2933	68.1896	6.24768	20.9002	3.22359	0.393185	2.76907		2.90001
SAVP	11	T	Nisyros		Upper Pumice	77.5515	0.215856	12.0197	1.18855	0.01044	0.169478	0.898218	3.27619	4.4459	0.00662089	99.7824		77.7206	0.216327	12.0459	1.19114	0.0104627	0.169848	0.900176	3.28333	4.4556	0.00663532	100
SAVP	11	T	Nisyros		Upper Pumice	77.5968	0.219398	12.0619	1.10607	0.0876686	0.15112	0.947872	3.29554	4.31256	0.0330856	99.8121		77.7429	0.219811	12.0846	1.10815	0.0878337	0.151404	0.949657	3.30175	4.32068	0.0331479	100
SAVP	17	M	Nisyros		Upper pumice	73.06	0.2138	11.89	1.29	0.0566	0.1499	0.948	3.65	4.11	0	95.3683		76.6083	0.224184	12.4675	1.35265	0.0593489	0.15718	0.994041	3.82727	4.30961	0	100			46.28	5.38	152.47	95.47	17.61	150.51	19.71	5.48	919.35	37.3	69.92	6.44	18.81	3.73	0.438	2.69	0.357	2.68	0.622
SAVP	17	M	Nisyros		Upper pumice	73.32	0.2102	11.96	1.2317	0.0677	0.1738	0.9518	3.49	4.11	0	95.5152		76.7627	0.22007	12.5216	1.28953	0.0708788	0.181961	0.996491	3.65387	4.30298	0	100			40.17	5.26	159.62	98.71	18.4	159.53	20.03	5.81	912.86	39.75	69.54	6.53	21.29	3.35	0.451	3.52	0.436	3.35	0.643
SAVP	17	M	Nisyros		Upper pumice	73	0.2267	12.03	1.2731	0.0612	0.1478	0.9667	3.5	4.09	0	95.2955		76.6038	0.237892	12.6239	1.33595	0.0642213	0.155097	1.01442	3.67279	4.29191	0	100			44.1	4.66	157.59	97.79	17.92	149.99	21.53	5.99	905.67	37.51	68.57	6.45	18.48	3.11	0.095	2.89	0.42	2.65	0.687
SAVP	17	M	Nisyros		Upper pumice	73.12	0.2076	11.98	1.1141	0	0.1602	0.9097	3.5	4.12	0.0117	95.1233		76.8687	0.218243	12.5942	1.17122	0	0.168413	0.956338	3.67944	4.33122	0.0122998	100			48.7	5.44	179.06	104.3	20.1	168.47	23.01	6.44	1022.43	42.16	76.99	7.46	21.75	3.42	0.457	3.02	0.476	2.49	0.551
SAVP	17	M	Nisyros		Upper pumice	69.57	0.1805	11.68	1.0838	0	0.16	0.9523	3.14	4.1	0	90.8666		76.5628	0.198643	12.854	1.19274	0	0.176082	1.04802	3.45562	4.51211	0	100			46.48	5.58	161.81	98.57	18.7	161.11	21.41	6.05	951.09	39.66	72.11	6.62	21.79	3.56	0.464	3	0.455	3.08	0.604
SAVP	17	M	Nisyros		Upper pumice	71.23	0.2159	11.59	1.1989	0.0417	0.1676	0.9947	3.46	4.08	0	92.9788		76.6089	0.232203	12.4652	1.28943	0.0448489	0.180256	1.06981	3.72128	4.3881	0	100
SAVP	17	M	Nisyros		Upper pumice	71.16	0.2144	11.94	1.41	0	0.153	0.9764	3.46	4.13	0.0147	93.4585		76.1407	0.229407	12.7757	1.50869	0	0.163709	1.04474	3.70218	4.41907	0.0157289	100
SAVP	17	M	Nisyros		Upper pumice	71.25	0.2057	11.96	1.2422	0.0769	0.1734	0.9308	3.56	4.1	0.0227	93.5217		76.1855	0.219949	12.7885	1.32825	0.0822269	0.185412	0.995277	3.8066	4.38401	0.0242724	100
SAVP	17	M	Nisyros		Upper pumice	70.91	0.2006	11.92	1.1912	0.0127	0.1743	1.0209	3.37	4.14	0.0031	92.9428		76.2942	0.215832	12.8251	1.28165	0.0136643	0.187535	1.09842	3.62589	4.45435	0.00333538	100
SAVP	17	M	Nisyros		Upper pumice	72.62	0.2302	11.77	1.2252	0.0262	0.1144	0.9213	3.53	4.14	0	94.5773		76.7838	0.243399	12.4448	1.29545	0.0277022	0.120959	0.974124	3.7324	4.37737	0	100
SAVP	17	M	Nisyros		Upper pumice	73.05	0.2247	11.98	1.2468	0.0452	0.1347	0.9216	3.42	4.13	0.0027	95.1557		76.7689	0.236139	12.5899	1.31027	0.0475011	0.141557	0.968518	3.59411	4.34025	0.00283745	100
SAVP	17	M	Nisyros		Upper pumice	72.81	0.194	11.94	1.2293	0	0.1613	0.9195	3.5	4.12	0	94.8741		76.7438	0.204482	12.5851	1.29572	0	0.170015	0.969179	3.6891	4.3426	0	100
SAVP	17	M	Nisyros		Upper pumice	72.61	0.2017	11.7	1.1536	0.0177	0.1661	0.937	3.35	4.07	0	94.2061		77.0757	0.214105	12.4196	1.22455	0.0187886	0.176316	0.994628	3.55603	4.32031	0	100
SAVP	17	M	Nisyros		Upper pumice	72.44	0.2037	11.7	1.1811	0.0273	0.1591	0.9026	3.52	4.15	0	94.2838		76.8319	0.21605	12.4093	1.25271	0.0289551	0.168746	0.957322	3.73341	4.4016	0	100
SAVP	17	M	Nisyros		Upper pumice	72.88	0.2117	11.76	1.1848	0.0956	0.153	0.9326	3.48	4.13	0.0353	94.863		76.8266	0.223164	12.3968	1.24896	0.100777	0.161285	0.983102	3.66845	4.35365	0.0372116	100
SAVP	17	M	Nisyros		Upper pumice	73.38	0.202	11.84	1.1758	0.0458	0.1439	0.9187	3.53	4.13	0.0369	95.4031		76.9157	0.211733	12.4105	1.23245	0.0480068	0.150834	0.962967	3.70009	4.329	0.038678	100
SAVP	17	M	Nisyros		Upper pumice	72.84	0.1902	11.82	1.2106	0.0587	0.1691	0.9229	3.45	4.13	0.0038	94.7953		76.8393	0.200643	12.469	1.27707	0.0619229	0.178384	0.973571	3.63942	4.35676	0.00400864	100
SAVP	17	M	Nisyros		Upper pumice	72.38	0.1866	11.7	1.1653	0.0314	0.1894	0.9282	3.41	4.16	0.0022	94.1531		76.8748	0.198188	12.4266	1.23767	0.0333499	0.201162	0.985841	3.62176	4.41834	0.00233662	100
SAVP	11	T	Nisyros		Lower Pumice	76.4531	0.260648	12.8937	1.5736	0.0095207	0.166495	0.90885	3.36486	4.11065	0.0311395	99.7725		76.6274	0.261242	12.9231	1.57719	0.00954241	0.166874	0.910922	3.37253	4.12002	0.0312105	100
SAVP	11	T	Nisyros		Lower Pumice	75.9562	0.272645	13.0158	1.61425	0.104501	0.196911	0.883595	3.45073	4.29004	0.0332922	99.818		76.0948	0.273143	13.0395	1.61719	0.104692	0.19727	0.885206	3.45703	4.29786	0.0333529	100					132.566	91.404	18.5654	241.525	20.2861		937.053	38.6143	64.9436	6.10759	20.5816	<LOD	<LOD	<LOD		2.76128
SAVP	11	T	Nisyros		Lower Pumice	76.2071	0.237241	12.833	1.53202	0.0443938	0.192093	0.882709	3.43184	4.3889	0.053731	99.803		76.3575	0.237709	12.8584	1.53504	0.0444814	0.192472	0.884451	3.43861	4.39756	0.053837	100					122.562	83.034	15.8059	223.498	19.9115		837.518	33.563	58.6255	5.50774	18.2335	<LOD	<LOD	<LOD		2.44843
SAVP	11	T	Nisyros		Lower Pumice	76.2725	0.272342	12.7618	1.42259	0.0461523	0.174717	0.923936	3.52356	4.33903	0.0545946	99.7912		76.432	0.272912	12.7885	1.42557	0.0462489	0.175082	0.925869	3.53093	4.34811	0.0547088	100					128.524	91.4446	18.6087	239.605	21.2294		925.739	37.6059	65.6624	6.18576	21.0595	3.70526	0.499862	2.99776		2.9095
SAVP	11	T	Nisyros		Lower Pumice	76.1339	0.290101	12.8163	1.48066	0.050737	0.180644	0.934571	3.5188	4.38819	0.0145412	99.8085		76.28	0.290657	12.8409	1.4835	0.0508343	0.18099	0.936364	3.52555	4.39661	0.0145691	100					128.247	83.421	16.541	216.05	19.6854		827.186	33.1332	59.3795	5.45883	18.2508	3.13111	0.419542	2.45487		2.66393
SAVP	11	T	Nisyros		Lower Pumice	76.165	0.251563	12.9222	1.56018	0.0620347	0.18992	0.941911	3.43308	4.23728	0.0427094	99.8058		76.3132	0.252052	12.9473	1.56321	0.0621554	0.19029	0.943743	3.43976	4.24553	0.0427925	100					117.366	94.7672	16.6035	236.408	19.2452		846.009	33.848	58.7143	5.60598	18.6136	3.17867	0.441421	<LOD		2.64361
SAVP	11	T	Nisyros		Lower Pumice	75.9933	0.267151	13.026	1.59239	0.0278189	0.178992	0.884004	3.46645	4.33274	0.025641	99.7945		76.1498	0.267701	13.0528	1.59567	0.0278762	0.17936	0.885824	3.47358	4.34166	0.0256938	100
SAVP	11	T	Nisyros		Lower Pumice	76.0185	0.2466	12.9225	1.61174	0.0267473	0.167717	0.922898	3.4446	4.38666	0.050058	99.798		76.1724	0.247099	12.9486	1.615	0.0268015	0.168056	0.924767	3.45157	4.39554	0.0501594	100					134.864	90.8239	19.0123	247.197	21.4484		950.693	39.1177	68.5036	6.22241	21.63	3.58665	0.512461	2.84303		3.10558
SAVP	11	T	Nisyros		Lower Pumice	76.0801	0.255479	13.1009	1.4735	0.0488881	0.19239	0.902942	3.68951	4.03101	0.0348007	99.8095		76.2253	0.255967	13.1259	1.47631	0.0489814	0.192757	0.904665	3.69656	4.0387	0.0348671	100					132.042	91.4402	19.588	258.198	21.6685		972.166	40.2809	69.6062	6.64826	21.6492	3.58709	0.535965	3.12091		3.24749
SAVP	11	T	Nisyros		Lower Pumice	76.2556	0.247651	12.9097	1.49923	0.0323996	0.177552	0.87566	3.73343	4.03536	0.047637	99.8143		76.3975	0.248112	12.9338	1.50202	0.0324598	0.177882	0.877289	3.74038	4.04287	0.0477257	100					134.659	88.0356	18.1289	242.969	21.0125		934.353	37.6248	65.8682	6.33205	19.4327	3.05035	0.499216	<LOD		2.77018
SAVP	11	T	Nisyros		Lower Pumice	76.0927	0.275803	12.8929	1.54319	0.00750929	0.198419	0.873625	3.74092	4.16317	0.0152151	99.8035		76.2425	0.276346	12.9183	1.54623	0.00752408	0.19881	0.875346	3.74828	4.17137	0.0152451	100					131.175	91.7226	18.5161	247.453	21.5445		946.16	37.9816	66.2157	6.08365	20.0394	3.32508	0.547457	<LOD		2.95219
SAVP	11	T	Nisyros		Lower Pumice	75.841	0.273924	13.1426	1.49918	0.0722887	0.177847	0.89668	3.81896	4.00847	0.0590461	99.79		76.0006	0.274501	13.1703	1.50233	0.0724408	0.178222	0.898567	3.827	4.01691	0.0591704	100					134.181	93.7969	19.279	257.184	21.9161		968.29	39.865	69.1543	6.56965	21.9618	3.29045	0.530661	3.05335		3.14352
SAVP	11	T	Nisyros		Lower Pumice	75.9789	0.265978	12.9159	1.57818	0.0543596	0.193723	0.895265	3.80622	4.09341	0.00900097	99.791		76.138	0.266535	12.943	1.58148	0.0544734	0.194129	0.89714	3.8142	4.10199	0.00901983	100					124.695	85.7888	17.4012	238.867	20.2582		899.529	36.9581	65.0506	5.99136	19.6166	3.3094	0.504725	3.07776		2.87963
SAVP	11	T	Nisyros		Lower Pumice	76.0703	0.265593	13.0034	1.50813	0.0432577	0.178366	0.911354	3.71798	4.06354	0.0373007	99.7993		76.2233	0.266127	13.0296	1.51117	0.0433447	0.178724	0.913187	3.72545	4.07171	0.0373757	100					119.967	83.7079	17.1203	225.068	19.2372		847.344	35.357	61.2201	5.89038	19.6263	3.74013	0.446876	2.57513		2.65382
SAVP	11	T	Nisyros		Lower Pumice	76.0364	0.226475	12.924	1.52687	0.0923847	0.177879	0.914262	3.80722	4.07908	0.0219541	99.8065		76.1838	0.226914	12.949	1.52983	0.0925638	0.178224	0.916035	3.8146	4.08699	0.0219967	100					131.249	92.7367	18.9204	250.344	20.762		930.928	38.6307	67.6614	6.26269	20.781	3.50919	0.534845	3.07027		3.04255
SAVP	11	T	Nisyros		Lower Pumice	75.9202	0.246275	13.0412	1.51615	0.0577917	0.167228	0.912658	3.79057	4.10229	0.0373846	99.7917		76.0787	0.24679	13.0684	1.51932	0.0579123	0.167577	0.914563	3.79848	4.11085	0.0374626	100					132.797	82.6528	17.3558	231.208	20.5241		871.792	35.9678	63.5181	6.00137	19.1291	3.34999	<LOD	2.61933		2.78618
SAVP	11	T	Nisyros		Lower Pumice	76.1749	0.263558	12.7604	1.64984	0.0629917	0.179747	0.882797	3.65863	4.12358	0.041494	99.798		76.3291	0.264091	12.7863	1.65318	0.0631192	0.180111	0.884583	3.66603	4.13192	0.041578	100					130.081	88.1781	18.2068	244.357	20.9843		922.62	37.8178	66.2167	6.27451	20.8386	3.24916	0.47621	2.75244		2.94148
SAVP	11	T	Nisyros		Lower Pumice	75.9053	0.27869	12.8752	1.47907	0.047524	0.176645	0.900913	3.72664	4.33953	0.0665479	99.796		76.0604	0.27926	12.9015	1.48209	0.0476211	0.177006	0.902755	3.73425	4.34841	0.0666839	100					132.492	85.4869	17.9121	240.949	20.6188		928.352	37.4513	65.8143	6.11463	19.2931	<LOD	0.513042	<LOD		2.98517
SAVP	11	T	Nisyros		Lower Pumice	76.0455	0.261639	12.8457	1.46506	0.0633431	0.163773	0.913962	3.75286	4.25642	0.032231	99.8004		76.1975	0.262162	12.8714	1.46799	0.0634697	0.1641	0.91579	3.76036	4.26493	0.0322954	100					129.22	81.5184	17.715	237.004	20.5315		893.855	36.1119	64.3675	6.02506	19.6778	3.47822	0.414365	3.39883		2.82287
SAVP	11	T	Nisyros		Lower Pumice	76.0848	0.246837	12.8829	1.46411	0.0660648	0.175994	0.911813	3.8204	4.08025	0.0646529	99.7978		76.2389	0.247337	12.909	1.46708	0.0661987	0.176351	0.91366	3.82814	4.08851	0.0647839	100					145.602	79.5576	16.7978	223.253	20.6164		870.19	35.473	61.9861	5.9057	18.4511	<LOD	0.502774	<LOD		2.5536
SAVP	11	T	Nisyros		Lower Pumice	76.1284	0.298177	12.8593	1.5294	0.0681347	0.176134	0.885979	3.76205	4.08188	0.0450635	99.8346		76.2546	0.298671	12.8806	1.53193	0.0682476	0.176426	0.887447	3.76828	4.08864	0.0451382	100					133.798	87.8107	18.5528	250.701	20.8672		922.488	38.8266	66.6462	6.16118	20.716	3.09818	0.468051	2.46383		2.94634
SAVP	11	T	Nisyros		Lower Pumice	75.9603	0.285094	12.9405	1.44395	0.0330308	0.186845	0.904549	3.84742	4.15222	0.0467313	99.8006		76.1121	0.285663	12.9663	1.44683	0.0330968	0.187219	0.906357	3.85511	4.16051	0.0468246	100					129.083	82.5585	17.975	233.115	20.2637		870.983	35.8955	63.9591	6.11117	19.5261	3.26295	0.461857	2.51079		2.90899
SAVP	11	T	Nisyros		Lower Pumice	75.9538	0.252742	12.9813	1.59198	0.040949	0.204689	0.861832	3.66114	4.20994	0.036257	99.7946		76.1101	0.253262	13.008	1.59525	0.0410333	0.20511	0.863605	3.66867	4.2186	0.0363317	100
SAVP	11	T	Nisyros		Lower Pumice	76.1239	0.257765	12.8824	1.48701	0.0793206	0.177529	0.873835	3.73768	4.13743	0.0608308	99.8177		76.2629	0.258236	12.906	1.48972	0.0794655	0.177853	0.875431	3.74451	4.14499	0.0609419	100					136.522	84.0703	18.2843	234.079	19.7614		882.477	36.3427	64.3284	6.04784	20.5645	3.28949	0.447056	2.62754		2.82945
SAVP	11	T	Nisyros		Lower Pumice	76.05	0.219429	12.9657	1.42592	0.0373482	0.171523	0.916757	3.87319	4.11628	0.0200758	99.7962		76.2053	0.219877	12.9921	1.42884	0.0374245	0.171874	0.91863	3.8811	4.12469	0.0201168	100					141.552	82.5831	18.7596	247.28	21.3874		918.302	38.6263	67.5837	6.25896	22.05	3.63956	0.46874	2.74147		3.16043
SAVP	11	T	Nisyros		Lower Pumice	75.864	0.280093	13.031	1.54417	0.0323783	0.179209	0.877503	3.55253	4.33774	0.102369	99.8011		76.0153	0.280651	13.057	1.54725	0.0324429	0.179566	0.879252	3.55961	4.34639	0.102573	100					137.826	86.0847	17.8706	242.275	21.5579		923.088	37.2799	66.3561	6.3115	20.5925	3.42048	0.466652	2.6744		2.70603
SAVP	11	T	Nisyros		Lower Pumice	76.1083	0.215147	12.7619	1.58956	0	0.198928	0.909608	3.70638	4.23165	0.0991372	99.8206		76.2451	0.215533	12.7848	1.59241	0	0.199286	0.911243	3.71305	4.23926	0.0993154	100					134.886	80.099	16.7492	226.852	21.0367		861.131	35.4394	63.9882	6.07943	19.6313	<LOD	0.490482	<LOD		2.75955
SAVP	11	T	Nisyros		Lower Pumice	76.0632	0.266665	12.9759	1.50184	0.0329696	0.161258	0.884521	3.74007	4.13938	0.0490126	99.8148		76.2043	0.26716	13	1.50462	0.0330307	0.161557	0.886162	3.74701	4.14706	0.0491035	100					132.949	85.193	16.3294	226.12	19.6325		864.032	34.8698	62.493	5.69851	19.7865	<LOD	0.382911	<LOD		2.49272
SAVP	11	T	Nisyros		Lower Pumice	76.166	0.278513	12.8678	1.52558	0.0517533	0.137575	0.926135	3.55264	4.31733	0	99.8234		76.3008	0.279006	12.8906	1.52828	0.0518449	0.137818	0.927774	3.55893	4.32497	0	100
SAVP	11	T	Nisyros		Lower Pumice	76.1622	0.243708	12.8324	1.46907	0.0823636	0.17492	0.949776	3.67455	4.16395	0.0371931	99.7901		76.3224	0.244221	12.8593	1.47216	0.0825368	0.175288	0.951773	3.68227	4.17271	0.0372713	100					137.288	83.6266	17.2161	235.102	20.6701		870.42	36.299	65.1342	5.77962	19.4627	3.65138	0.490587	2.83442		2.75385
SAVP	11	T	Nisyros		Lower Pumice	76.0815	0.248157	12.8375	1.56367	0.0675212	0.208865	0.872977	3.72021	4.14513	0.0361252	99.7817		76.248	0.2487	12.8656	1.56709	0.067669	0.209322	0.874887	3.72835	4.1542	0.0362042	100					134.472	92.8164	19.7108	260.474	21.8007		952.496	39.3424	70.4692	6.64002	22.7126	3.58684	0.511219	3.0619		3.19277
SAVP	11	T	Nisyros		Lower Pumice	76.0749	0.248911	12.9274	1.52427	0.0435108	0.16784	0.90929	3.76735	4.10674	0.0253994	99.7957		76.2307	0.24942	12.9539	1.52739	0.0435999	0.168184	0.911152	3.77506	4.11515	0.0254514	100					136.889	96.1003	17.9431	240.714	21.0557		920.107	37.6085	66.6165	6.24123	21.8215	3.60043	0.422515	2.79187		2.80963
SAVP	11	T	Nisyros		Lower Pumice	76.0841	0.249843	12.943	1.56733	0.0876201	0.184148	0.887458	3.68878	4.0843	0.036847	99.8134		76.2263	0.25031	12.9672	1.57026	0.0877839	0.184492	0.889117	3.69568	4.09194	0.0369159	100
SAVP	11	T	Nisyros		Lower Pumice	75.8048	0.254664	12.9948	1.73242	0.0335658	0.185953	0.93385	3.73141	4.08797	0.0184396	99.7779		75.9736	0.255231	13.0237	1.73628	0.0336405	0.186367	0.935929	3.73972	4.09707	0.0184806	100
SAVP	11	T	Nisyros		Lower Pumice	75.9673	0.294366	12.986	1.58889	0.0746706	0.172195	0.954631	3.68588	4.07619	0.0171963	99.8173		76.1063	0.294905	13.0098	1.5918	0.0748073	0.17251	0.956378	3.69262	4.08365	0.0172278	100
SAVP	11	T	Nisyros		Lower Pumice	76.1014	0.247465	12.9639	1.61095	0.0284839	0.200784	0.862662	3.74781	4.00432	0.0362645	99.804		76.2508	0.247951	12.9893	1.61411	0.0285398	0.201178	0.864357	3.75517	4.01219	0.0363357	100					138.514	87.5561	16.4197	221.698	19.8177		859.021	34.8024	61.6974	6.05303	19.3548	3.52825	<LOD	2.85337		2.55677
SAVP	11	T	Nisyros		Lower Pumice	75.8073	0.271908	12.9738	1.6645	0.0730766	0.227418	0.935664	3.67776	4.15633	0.0271157	99.8148		75.9479	0.272413	12.9978	1.66758	0.0732122	0.22784	0.9374	3.68458	4.16404	0.027166	100					132.184	87.5417	16.3863	224.077	19.8891		846.527	34.1584	60.9442	5.61346	18.1427	3.0864	0.436783	<LOD		2.28865
SAVP	11	T	Nisyros		Lower Pumice	75.9558	0.29733	13.302	1.45302	0.0185106	0.184603	0.870705	3.62599	4.11856	0	99.8265		76.0878	0.297847	13.3251	1.45554	0.0185428	0.184924	0.872218	3.63229	4.12571	0	100					138.334	84.2773	16.9266	219.309	19.8193		845.131	34.4833	61.1198	5.70226	19.2238	3.13844	0.466522	2.82656		2.50237
SAVP	11	T	Nisyros		Lower Pumice	76.2046	0.256219	12.9176	1.47941	0.0227083	0.188389	0.890998	3.65666	4.14916	0.0404766	99.8062		76.3525	0.256717	12.9427	1.48228	0.0227524	0.188755	0.892728	3.66376	4.15721	0.0405552	100					136.918	90.3406	17.8416	235.62	20.4143		906.039	36.7349	64.6744	6.12815	20.5071	3.37321	0.487933	2.81688		2.9583
SAVP	11	T	Nisyros		Lower Pumice	75.9925	0.219932	13.1766	1.6101	0.0390812	0.179689	0.853419	3.67249	4.00737	0.0429763	99.7942		76.1493	0.220385	13.2038	1.61342	0.0391618	0.18006	0.855179	3.68006	4.01564	0.043065	100					130.205	91.4793	19.3853	242.366	21.1017		917.93	38.2345	67.0848	6.41029	21.733	3.09416	0.468382	2.7784		3.16417
SAVP	11	T	Nisyros		Lower Pumice	76.0627	0.246577	12.8571	1.60298	0.0143459	0.189306	0.935931	3.67911	4.17809	0.0217566	99.7879		76.2244	0.247101	12.8844	1.60638	0.0143764	0.189709	0.93792	3.68693	4.18697	0.0218028	100					134.664	95.444	18.821	246.731	21.2234		929.413	38.6535	68.7458	6.27649	21.7774	3.57147	0.431918	2.87149		2.93295
SAVP	11	T	Nisyros		Lower Pumice	76.1885	0.25811	12.8469	1.44147	0.0946066	0.19844	0.93264	3.71349	4.09882	0.0221898	99.7951		76.3449	0.25864	12.8732	1.44443	0.0948008	0.198847	0.934554	3.72111	4.10723	0.0222354	100					141.172	82.7932	16.2075	208.785	19.3631		837.612	32.9385	60.2092	5.12425	18.174	<LOD	<LOD	<LOD		2.44
SAVP	11	T	Nisyros		Lower Pumice	76.0116	0.26241	12.8728	1.52751	0.061354	0.157001	0.884197	3.86184	4.12212	0.024155	99.785		76.1753	0.262975	12.9006	1.5308	0.0614862	0.157339	0.886102	3.87017	4.131	0.0242071	100					134.23	85.6888	16.7467	223.959	19.9475		856.274	35.8343	61.924	6.24868	18.56	<LOD	<LOD	<LOD		2.51244
SAVP	11	T	Nisyros		Lower Pumice	75.9079	0.246366	13.0739	1.5986	0.0706675	0.190642	0.915691	3.66447	4.09385	0.0443812	99.8064		76.0551	0.246844	13.0992	1.6017	0.0708045	0.191012	0.917467	3.67158	4.10179	0.0444672	100					138.44	88.2723	16.9996	226.717	20.4832		871.766	34.4083	62.0279	6.09802	19.7775	3.46107	0.466768	2.7647		2.87468
SAVP	11	T	Nisyros		Lower Pumice	76.2091	0.27165	12.7798	1.57176	0.0793872	0.171432	0.859326	3.71741	4.07931	0.0756713	99.8149		76.3504	0.272154	12.8036	1.57467	0.0795344	0.17175	0.86092	3.7243	4.08687	0.0758116	100
SAVP	11	T	Nisyros		Lower Pumice	75.94	0.260231	13.016	1.60978	0.0312154	0.211294	0.922044	3.74069	4.02132	0.0484426	99.801		76.0914	0.26075	13.0419	1.61299	0.0312776	0.211715	0.923883	3.74814	4.02934	0.0485392	100					133.51	93.9	18.8416	244.957	20.8385		918.47	39.0032	68.0009	6.56002	21.6314	3.90552	0.506088	2.69989		3.11238
SAVP	11	T	Nisyros		Lower Pumice	76.1684	0.253716	12.9445	1.48432	0.0312604	0.205837	0.951229	3.61737	4.11579	0.0475345	99.82		76.3058	0.254174	12.9679	1.48699	0.0313168	0.206209	0.952944	3.6239	4.12321	0.0476202	100
SAVP	17	M	Nisyros		Lower Pumice	71.99	0.2559	12.33	1.53	0.0096	0.2253	0.9223	3.76	4.11	0.0227	95.1558		75.6549	0.268927	12.9577	1.60789	0.0100887	0.23677	0.969253	3.95141	4.31923	0.0238556	100			47.48	5.67	131.02	88.89	19.19	246.15	20.82	4.57	933.97	37	64.58	6.54	21.61	3.09	0.561	2.78	0.481	3.04	0.596
SAVP	17	M	Nisyros		Lower Pumice	72.5	0.261	12.7	1.242	0.0082	0.1615	0.8756	3.91	3.95	0	95.6083		75.8302	0.272989	13.2834	1.29905	0.00857666	0.168918	0.91582	4.0896	4.13144	0	100			42.31	5.32	124.77	85.83	18.21	237.88	19.32	4.55	857.03	35.99	60.93	5.92	19.94	2.82	0.392	2.46	0.427	2.55	0.614
SAVP	17	M	Nisyros		Lower Pumice	70.56	0.2687	12.38	1.34	0.0435	0.1446	0.8876	3.86	3.92	0.0351	93.4395		75.5141	0.287566	13.2492	1.43408	0.0465542	0.154753	0.949919	4.13102	4.19523	0.0375644	100			45.47	5.35	122.89	87.11	18.27	242.13	20.34	4.28	874.12	36.92	63.87	6.33	20.16	2.94	0.526	2.69	0.442	3.36	0.7
SAVP	17	M	Nisyros		Lower Pumice	72.23	0.2762	12.53	1.38	0.0696	0.2191	0.8687	3.99	4.12	0.0148	95.6984		75.4767	0.288615	13.0932	1.44203	0.0727285	0.228948	0.907748	4.16935	4.30519	0.0154653	100
SAVP	17	M	Nisyros		Lower Pumice	70.08	0.246	12.42	1.36	0.0734	0.1465	0.9699	3.9	4.1	0.0534	93.3492		75.073	0.263527	13.3049	1.4569	0.0786295	0.156938	1.039	4.17786	4.39211	0.0572046	100			52.82	5.37	136.28	95.08	19.99	266.34	22.31	4.55	959.56	39.14	68.94	6.76	21.6	3.39	0.511	2.8	0.401	3.17	0.702
SAVP	17	M	Nisyros		Lower Pumice	71.55	0.2548	12.62	1.6	0.0543	0.1783	0.9561	3.98	4.04	0.0516	95.2851		75.0904	0.267408	13.2445	1.67917	0.0569869	0.187123	1.00341	4.17694	4.23991	0.0541533	100			53.46	4.7	129.77	89.66	19.12	253.6	21.1	4.6	902.51	38.44	65.62	6.33	21.56	3.59	0.505	2.55	0.51	2.79	0.651
SAVP	17	M	Nisyros		Lower Pumice	72.11	0.247	12.37	1.52	0.0527	0.194	0.8761	3.86	4.03	0.0443	95.3041		75.6631	0.25917	12.9795	1.59489	0.0552967	0.203559	0.919268	4.05019	4.22857	0.0464828	100
SAVP	17	M	Nisyros		Lower Pumice	71.91	0.2123	12.39	1.36	0.0214	0.1999	0.9062	3.97	4.01	0.016	94.9958		75.6981	0.223484	13.0427	1.43164	0.0225273	0.21043	0.953937	4.17913	4.22124	0.0168428	100
SAVP	17	M	Nisyros		Lower Pumice	71.06	0.2403	12.41	1.55	0.0565	0.1534	0.8797	3.65	3.82	0.0578	93.8777		75.6942	0.255971	13.2193	1.65108	0.0601847	0.163404	0.93707	3.88804	4.06912	0.0615695	100
SAVP	17	M	Nisyros		Lower Pumice	71.63	0.2236	12.72	1.3	0.0812	0.2084	0.9158	3.89	4.01	0.0166	94.9956		75.4035	0.235379	13.3901	1.36848	0.0854776	0.219379	0.964045	4.09493	4.22125	0.0174745	100
SAVP	17	M	Nisyros		Lower Pumice	70.31	0.2367	12.22	1.3	0.0521	0.1939	0.8928	3.78	4.04	0.0135	93.039		75.5705	0.254409	13.1343	1.39726	0.055998	0.208407	0.959598	4.06281	4.34227	0.01451	100
SAVP	17	M	Nisyros		Lower Pumice	69.64	0.233	11.87	1.56	0.0964	0.2158	0.8754	3.97	4.08	0.008	92.5486		75.247	0.25176	12.8257	1.6856	0.104161	0.233175	0.945881	4.28964	4.40849	0.00864411	100
SAVP	17	M	Nisyros		Lower Pumice	71.2	0.2525	12.42	1.45	0.0515	0.1858	0.9143	3.98	4.15	0.0223	94.6264		75.2433	0.266839	13.1253	1.53234	0.0544246	0.196351	0.966221	4.20601	4.38567	0.0235664	100
SAVP	17	M	Nisyros		Lower Pumice	71.58	0.2003	12.21	1.5	0.0675	0.1853	0.8502	4.3	3.93	0.0255	94.8488		75.4675	0.211178	12.8731	1.58146	0.0711659	0.195364	0.896374	4.53353	4.14344	0.0268849	100
SAVP	17	M	Nisyros		Lower Pumice	70.85	0.2297	12.48	1.54	0.0563	0.1439	0.8375	3.81	4.13	0.006	94.0834		75.3055	0.244145	13.2648	1.63685	0.0598405	0.152949	0.890168	4.0496	4.38972	0.00637732	100
SAVP	17	M	Nisyros		Lower Pumice	70.42	0.2358	12.28	1.58	0.033	0.1931	0.8948	3.82	4.01	0.0332	93.4999		75.3156	0.252193	13.1337	1.68984	0.0352942	0.206524	0.957006	4.08557	4.28877	0.0355081	100
SAVP	17	M	Nisyros		Lower Pumice	70.61	0.2368	12.32	1.42	0.0872	0.1855	0.8442	3.85	4.04	0.0527	93.6464		75.4007	0.252866	13.1559	1.51634	0.0931162	0.198086	0.901476	4.11121	4.3141	0.0562755	100
SAVP	17	M	Nisyros		Lower Pumice	71.45	0.251	12.37	1.45	0.087	0.1865	0.8724	3.81	3.95	0.0212	94.4481		75.65	0.265754	13.0971	1.53523	0.0921141	0.197463	0.923682	4.03396	4.18219	0.0224462	100
SAVP	17	M	Nisyros		Lower Pumice	71.34	0.2442	12.29	1.46	0.0551	0.1649	0.8793	4.04	3.98	0.0391	94.4926		75.498	0.258433	13.0063	1.54509	0.0583114	0.174511	0.930549	4.27547	4.21197	0.0413789	100
SAVP	17	M	Nisyros		Lower Pumice	71.72	0.2445	12.57	1.38	0.012	0.1804	0.8465	4.09	4	0.0005	95.0439		75.4599	0.25725	13.2255	1.45196	0.0126257	0.189807	0.890641	4.30327	4.20858	0.000526073	100
SAVP	17	M	Nisyros		Lower Pumice	70.71	0.2289	12.47	1.61	0.0835	0.2	0.9068	3.92	4.14	0.0439	94.3131		74.9737	0.242702	13.2219	1.70708	0.0885349	0.21206	0.961478	4.15637	4.38963	0.0465471	100
SAVP	17	M	Nisyros		Lower Pumice	70.8	0.2336	12.33	1.48	0.0698	0.2164	0.8737	3.87	4.18	0.0406	94.0941		75.2438	0.248262	13.1039	1.57289	0.0741811	0.229983	0.928539	4.1129	4.44236	0.0431483	100
SAVP	17	M	Nisyros		Nisyros-Kyra-1	58.8	0.426	15.53	3.49	0.1717	0.699	2.43	5.55	2.31	0.1279	89.5346		65.6729	0.475794	17.3452	3.89793	0.191769	0.780704	2.71403	6.19872	2.58001	0.14285	100			29.98	3.78	79.2	344.36	25.79	255.53	20.2	2.88	845.99	39.03	70.78	7.79	26.07	4.45	0.921	3.58	0.62	4.02	0.732
SAVP	17	M	Nisyros		Nisyros-Kyra-2	60.62	0.4089	15.57	3.03	0.1951	0.7356	2.61	5.34	2.42	0.1316	91.0612		66.5706	0.449039	17.0984	3.32743	0.214252	0.807808	2.8662	5.86419	2.65755	0.144518	100			32.66	4.24	85.6	369.41	26.46	270.04	22.16	3.02	903.52	41.87	76.4	7.96	28.16	4.82	1.31	3.52	0.559	4.06	1.028
SAVP	17	M	Nisyros		Nisyros-Kyra-5	61.2255	0.403725	15.855	3.108	0.161595	0.734265	2.6775	5.586	2.436	0.122115	92.3097		66.3262	0.437359	17.1759	3.36693	0.175057	0.795436	2.90056	6.05137	2.63894	0.132288	100			23.94	4.23	77.79	363.17	27.25	270.29	21.16	2.88	888.37	41.19	71.02	7.52	25.8	4.19	1.017	4.07	0.731	3.69	0.854
SAVP	17	M	Nisyros		Nisyros-Kyra-6	62.034	0.433545	16.212	3.2235	0.16527	0.763035	2.4465	5.3025	2.4885	0.09219	93.161		66.5879	0.465372	17.4021	3.46014	0.177402	0.819049	2.6261	5.69176	2.67118	0.0989577	100			27.86	4.42	84.3	348.02	27.41	261.41	21.9	3.14	866.41	40.39	73.51	7.66	26.66	4.41	1.056	4.15	0.767	3.82	1.011
SAVP	17	M	Nisyros		Nisyros-Kyra-7	62.7	0.3865	16.47	3.36	0.2018	0.7008	2.64	5.89	2.49	0.0994	94.9385		66.0428	0.407106	17.3481	3.53913	0.212559	0.738162	2.78075	6.20402	2.62275	0.104699	100
SAVP	17	M	Nisyros		Nisyros-Kyra-8	61.07	0.3807	15.73	3.48	0.1242	0.7359	2.6	5.71	2.42	0.145	92.3958		66.0961	0.412032	17.0246	3.7664	0.134422	0.796465	2.81398	6.17993	2.61917	0.156934	100
SAVP	17	M	Nisyros		Nisyros-Kyra-9	60.858	0.39753	16.1175	3.2865	0.10584	0.722715	2.52	5.8905	2.5305	0.129885	92.559		65.7505	0.429488	17.4132	3.55071	0.114349	0.780816	2.72259	6.36405	2.73393	0.140327	100
SAVP	17	M	Nisyros		Nisyros-Kyra-10	62.43	0.4262	15.95	3.22	0.1085	0.7667	2.57	5.36	2.51	0.071	93.4124		66.8327	0.456256	17.0748	3.44708	0.116152	0.820769	2.75124	5.738	2.68701	0.076007	100
SAVP	17	M	Nisyros		Nisyros-Kyra-11	61.886	0.39985	15.928	3.234	0.15411	0.74404	2.508	6.149	2.53	0.15213	93.6851		66.0574	0.426802	17.0016	3.45199	0.164498	0.794192	2.67705	6.56347	2.70054	0.162384	100
SAVP	17	M	Nisyros		Nisyros-Kyra-12	60.676	0.3883	15.378	4.356	0.08338	0.73601	2.398	5.148	2.486	0.09768	91.7474		66.1338	0.423227	16.7612	4.74782	0.09088	0.802214	2.6137	5.61106	2.70961	0.106466	100
SAVP	17	M	Nisyros		Nisyros-Kyra-13	59.61	0.4136	15.43	3.2	0.1553	0.7561	2.42	5.83	2.42	0.096	90.331		65.9906	0.457872	17.0816	3.54253	0.171923	0.837033	2.67904	6.45404	2.67904	0.106276	100
SAVP	17	M	Nisyros		Nisyros-Kyra-14	58.41	0.3838	15.3	2.86	0.1035	0.6989	2.31	4.93	2.38	0.1336	87.5098		66.7468	0.438579	17.4838	3.26821	0.118272	0.798653	2.6397	5.63365	2.7197	0.152669	100
SAVP	17	M	Nisyros		Nisyros-Kyra-15	54.92	1.4694	13.97	7.85	0.216	6.27	6.56	4.82	1.65	0.0658	97.7912		56.1605	1.50259	14.2855	8.02731	0.220879	6.41162	6.70817	4.92887	1.68727	0.0672862	100
SAVP	17	M	Nisyros		Nisyros-Kyra-16	62.35	0.4034	16.08	3.18	0.0976	0.7534	2.56	5.87	2.45	0.0964	93.8408		66.4423	0.429877	17.1354	3.38872	0.104006	0.802849	2.72802	6.25527	2.6108	0.102727	100
SAVP	2	T	Nisyros		Nisyros A	72.2	0.19	12.7	1.37		0.16	0.84	1.61	3.25		92.32		78.2062	0.205806	13.7565	1.48397	0	0.17331	0.909879	1.74393	3.52036	0	100
SAVP	2	T	Nisyros		Nisyros G	74	0.2	11.8	1.02		0.13	0.89	1.88	3.68		93.6		79.0598	0.213675	12.6068	1.08974	0	0.138889	0.950855	2.00855	3.93162	0	100
SAVP	3	M	Nisyros			77.18	0.19	12.3	1.13	0.1	0.14	0.85	3.45	4.66		100		77.18	0.19	12.3	1.13	0.1	0.14	0.85	3.45	4.66	0	100
SAVP	3	M	Nisyros			77.21	0.2	12.76	1.32	0	0.24	0.93	2.89	4.45		100		77.21	0.2	12.76	1.32	0	0.24	0.93	2.89	4.45	0	100
SAVP	9	M	Nisyros	NIS		62.29	0.4	18.66	2.95	0.2	0.38	1.82	5.83	7.4	0.07	100		62.29	0.4	18.66	2.95	0.2	0.38	1.82	5.83	7.4	0.07	100				5.37	509.01	31.18	57.46	655.43	11.42	38.82	22.8	128.78	236.47	24.89	86.09	14.88	1.44	11.67	1.7	10.39	1.92
SAVP	9	M	Nisyros	NIS		77.69	0.2	12.18	1.25	0.03	0.17	0.95	3.27	4.23	0.02	99.99		77.6978	0.20002	12.1812	1.25013	0.030003	0.170017	0.950095	3.27033	4.23042	0.020002	100				7.07	147.15	93.23	21.47	76.5	19.34	5.6	794.9	39.81	63.02	6.14	20.57	3.59	0.38	2.95	0.49	3.31	0.7
SAVP	9	M	Nisyros	NIS		77.54	0.22	12.18	1.32	0.03	0.17	0.96	3.34	4.2	0.03	99.99		77.5478	0.220022	12.1812	1.32013	0.030003	0.170017	0.960096	3.34033	4.20042	0.030003	100				4.49	136.65	108.92	22.49	175.64	18.7	4.75	834.02	41.69	64.67	6.44	21.79	3.54	0.42	3.15	0.5	3.39	0.74
SAVP	9	M	Nisyros	NIS		62.16	0.39	18.47	3.1	0.18	0.53	2.06	5.09	7.92	0.09	99.99		62.1662	0.390039	18.4718	3.10031	0.180018	0.530053	2.06021	5.09051	7.92079	0.090009	100				3.73	321.63	29.63	63.35	694.36	109.38	31.91	21.42	129.82	226.55	24.2	85.29	15.08	1.44	12.09	1.81	11.02	2.12
SAVP	9	M	Nisyros	NIS		62.26	0.4	18.64	2.9	0.21	0.37	1.78	6.15	7.22	0.04	99.97		62.2787	0.40012	18.6456	2.90087	0.210063	0.370111	1.78053	6.15185	7.22217	0.040012	100				3.88	430.92	24.9	70.67	802.69	118.92	33	16.02	45.19	241.63	26.21	92.55	16.42	1.51	13.43	1.95	12.29	2.3
SAVP	9	M	Nisyros	NIS		77.43	0.21	12.38	1.26	0.04	0.19	0.95	3.38	4.13	0.02	99.99		77.4377	0.210021	12.3812	1.26013	0.040004	0.190019	0.950095	3.38034	4.13041	0.020002	100				4.73	136.99	99.46	20.39	161.62	18.07	4.9	809.81	39.2	64.72	6.15	20.35	3.42	0.39	3	0.45	3.19	0.65
SAVP	2	T	Kos	W-3	KPT	75.5	0.03	12.4	0.46		0	0.5	2.16	4.62		95.67		78.9171	0.0313578	12.9612	0.480819	0	0	0.52263	2.25776	4.8291		100
SAVP	2	M	Kos	W-3	KPT	73.5	0.05	12	0.42		0.03	0.5	4.2	4.2		94.9		77.4499	0.052687	12.6449	0.442571	0	0.0316122	0.52687	4.42571	4.42571		100
SAVP	3	M	Kos	W-3	KPT	77.34	0.1	12.95	0.53	0.08	0.04	0.58	3.85	4.53		100		77.34	0.1	12.95	0.53	0.08	0.04	0.58	3.85	4.53		100
SAVP	3	M	Kos	W-3	KPT	77.56	0.08	12.65	0.51	0.07	0.07	0.53	3.6	4.94		100.01		77.5522	0.079992	12.6487	0.509949	0.069993	0.069993	0.529947	3.59964	4.93951		100
SAVP	3	M	Kos	W-3	KPT	77.66	0.08	12.78	0.51	0.04	0.04	0.54	3.77	4.58		100		77.66	0.08	12.78	0.51	0.04	0.04	0.54	3.77	4.58		100
SAVP	3	M	Kos	W-3	KPT	77.45	0.05	12.64	0.44	0	0.03	0.53	4.43	4.43		100		77.45	0.05	12.64	0.44	0	0.03	0.53	4.43	4.43		100
SAVP	3	M	Kos	W-3	KPT	78.92	0.03	12.96	0.48	0	0	0.52	2.26	4.83		100		78.92	0.03	12.96	0.48	0	0	0.52	2.26	4.83		100
SAVP	17	M	Kos	W-3	KPT	74.41	0.0979	11.93	0.4804	0.028	0.0445	0.5656	3.71	4.47	0.0086	95.7451		77.7168	0.102251	12.4602	0.501749	0.0292443	0.0464776	0.590735	3.87487	4.66865	0.00898218	99.9999			53.09	3.97	158.2	42.34	14.19	49.89	24.91	6.6	472.08	22.84	42.57	3.74	10.56	2.04	0.151	2.02	0.418	2.15	0.419
SAVP	17	M	Kos	W-3	KPT	72.88	0.0724	12.18	0.5394	0.0404	0.0325	0.5375	3.72	4.5	0	94.5023		77.1198	0.0766119	12.8886	0.57078	0.0427503	0.0343907	0.568769	3.93641	4.76179	0	99.9999			54.34	4.38	166.55	40.98	13.32	49.1	25.59	6.14	464.61	22.5	42.04	3.61	11.27	2.26	0.231	1.87	0.312	1.87	0.461
SAVP	17	M	Kos	W-3	KPT	71.98	0.0926	12.13	0.4842	0.1315	0.0548	0.5594	3.75	4.45	0.0111	93.6437		76.8658	0.0988855	12.9534	0.517066	0.140426	0.0585197	0.597371	4.00454	4.75205	0.0118534	99.9999			61.91	4.61	183.39	45.88	14.11	52.53	27.71	6.76	511.27	24.24	46.48	4.03	11.44	2.57	0.15	1.31	0.314	1.75	0.486
SAVP	17	M	Kos	W-3	KPT	71.7	0.0807	12.02	0.5088	0.0631	0.0375	0.5859	3.62	4.45	0.0037	93.0697		77.039	0.0867092	12.9151	0.546687	0.0677986	0.0402924	0.629528	3.88956	4.78136	0.00397552	100			67.36	5.35	211.74	51.56	16.47	60.54	31.6	7.81	576.16	27.07	53.61	4.48	14.1	2.85	0.213	2.03	0.356	1.95	0.482
SAVP	17	M	Kos	W-3	KPT	72.78	0.0738	12.07	0.5645	0	0.0388	0.5707	3.69	4.44	0.0302	94.2581		77.2135	0.0782957	12.8053	0.598888	0	0.0411636	0.605465	3.91478	4.71047	0.0320397	99.9999			64.34	5.24	200.16	49.13	16.05	59.95	31.44	7.81	554.04	27.53	51.19	4.64	13.37	2.68	0.224	2.64	0.344	1.96	0.526
SAVP	17	M	Kos	W-3	KPT	72.7	0.0579	12.04	0.5966	0.0118	0.042	0.5551	3.76	4.44	0	94.2035		77.1734	0.0614627	12.7808	0.63331	0.0125261	0.0445843	0.589256	3.99136	4.7132	0	99.9999
SAVP	17	M	Kos	W-3	KPT	72.6	0.0836	12.1	0.5914	0.0532	0.0439	0.5711	3.53	4.44	0.0117	94.025		77.2135	0.0889125	12.8689	0.628982	0.0565807	0.0466897	0.607392	3.75432	4.72215	0.0124435	99.9999
SAVP	17	M	Kos	W-3	KPT	72.76	0.0847	12.18	0.5437	0.0745	0.0452	0.5616	3.64	4.45	0.0105	94.3503		77.1169	0.0897718	12.9093	0.576257	0.0789611	0.0479066	0.595229	3.85796	4.71647	0.0111287	99.9999
SAVP	17	M	Kos	W-3	KPT	74.32	0.042	12.12	0.5909	0.0801	0.0312	0.5488	3.61	4.44	0	95.7831		77.592	0.0438491	12.6536	0.616915	0.0836264	0.0325736	0.572961	3.76893	4.63547	0	99.9999
SAVP	17	M	Kos	W-3	KPT	74.3	0.0834	12.14	0.4745	0.0824	0.0451	0.5885	3.53	4.6	0	95.8439		77.5219	0.0870165	12.6664	0.495076	0.0859731	0.0470557	0.614019	3.68307	4.79947	0	100
SAVP	17	M	Kos	W-3	KPT	74.11	0.0986	12.19	0.4457	0.0854	0.0719	0.5731	3.73	4.56	0	95.8648		77.3068	0.102853	12.7158	0.464926	0.0890838	0.0750015	0.597821	3.8909	4.7567	0	99.9999
SAVP	17	M	Kos	W-3	KPT	74.51	0.0985	12.13	0.4709	0	0.0432	0.5747	3.62	4.43	0.0154	95.8928		77.7013	0.102719	12.6495	0.491069	0	0.0450503	0.599315	3.77505	4.61974	0.0160596	99.9999
SAVP	17	M	Kos	W-3	KPT	73.98	0.0817	12.16	0.4513	0.0648	0.0641	0.5504	3.53	4.49	0	95.3724		77.5696	0.0856642	12.75	0.473198	0.0679442	0.0672102	0.577106	3.70128	4.70786	0	99.9999
SAVP	17	M	Kos	W-3	KPT	74.73	0.0926	12.05	0.4055	0.071	0.0673	0.5837	3.53	4.47	0.008	96.0082		77.8371	0.0964501	12.551	0.42236	0.073952	0.0700982	0.607969	3.67677	4.65585	0.00833262	99.9999
SAVP	17	M	Kos	W-3	KPT	73.89	0.0645	12.05	0.4777	0.0878	0.0146	0.5643	3.54	4.56	0	95.249		77.5756	0.0677172	12.6511	0.501528	0.0921794	0.0153282	0.592447	3.71657	4.78745	0	99.9999
SAVP	17	M	Kos	W-3	KPT	73.64	0.0898	12.04	0.5073	0.1097	0.0173	0.5522	3.73	4.45	0.0386	95.175		77.3733	0.0943525	12.6504	0.533018	0.115261	0.018177	0.580194	3.9191	4.6756	0.0405569	99.9999
SAVP	17	M	Kos	W-3	KPT	74.78	0.0824	11.86	0.46	0.0808	0.0631	0.5486	3.53	4.5	0	95.905		77.973	0.0859184	12.3664	0.479641	0.08425	0.0657943	0.572024	3.68073	4.69214	0	99.9999
SAVP	17	M	Kos	W-3	KPT	73.67	0.0908	11.8	0.495	0.0724	0.0363	0.558	3.55	4.52	0.0125	94.8051		77.7068	0.0957754	12.4466	0.522124	0.0763672	0.0382891	0.588576	3.74452	4.76768	0.0131849	99.9999
SAVP	17	M	Kos	W-3	KPT	73.87	0.0757	11.99	0.4401	0.0854	0.0332	0.5737	3.74	4.48	0.0163	95.3045		77.5095	0.0794296	12.5807	0.461783	0.0896075	0.0348357	0.601965	3.92426	4.70072	0.0171031	99.9999
SAVP	17	M	Kos	W-3	KPT	73.13	0.076	11.92	0.5124	0.0374	0.053	0.5438	3.7	4.56	0.0011	94.5337		77.3587	0.0803946	12.6093	0.542029	0.0395626	0.0560647	0.575245	3.91395	4.82368	0.00116361	100
SAVP	17	M	Kos	W-3	KPT	74.6	0.0878	12.04	0.5447	0.0482	0.0364	0.5374	3.66	4.51	0.0152	96.0798		77.6438	0.0913824	12.5313	0.566925	0.0501666	0.0378852	0.559327	3.80933	4.69401	0.0158202	99.9999
SAVP	17	M	Kos	W-3	KPT	75.25	0.0808	11.98	0.5037	0.0239	0.0574	0.5497	3.64	4.5	0.0065	96.5921		77.9049	0.0836507	12.4027	0.521471	0.0247432	0.0594251	0.569094	3.76842	4.65877	0.00672933	99.9999
SAVP	17	M	Kos	W-3	KPT	74.43	0.0765	11.98	0.4501	0.0426	0.0708	0.5544	3.48	4.49	0.0071	95.5816		77.8706	0.0800363	12.5338	0.470907	0.0445692	0.0740728	0.580028	3.64087	4.69756	0.00742821	99.9999
SAVP	17	M	Kos	W-3	KPT	74.24	0.0569	12.04	0.5704	0.07	0.0274	0.5237	3.42	4.61	0.0288	95.5872		77.6673	0.0595268	12.5958	0.596733	0.0732316	0.0286649	0.547877	3.57788	4.82282	0.0301296	100
SAVP	17	M	Kos	W-3	KPT	74.2	0.0848	11.71	0.4769	0.0482	0.0464	0.512	3.42	4.49	0	94.9884		78.1148	0.0892741	12.3278	0.502061	0.050743	0.0488481	0.539013	3.60044	4.72689	0	99.9999
SAVP	17	M	Kos	W-3	KPT	73.98	0.083	12	0.5381	0.0665	0.0248	0.5437	3.71	4.41	0.0216	95.3778		77.5652	0.0870223	12.5815	0.564177	0.0697227	0.0260019	0.570049	3.88979	4.62372	0.0226468	99.9999
SAVP	17	M	Kos	W-3	KPT	73.95	0.0842	11.99	0.5723	0.1143	0.0598	0.565	3.63	4.45	0.0228	95.4384		77.4845	0.0882244	12.5631	0.599654	0.119763	0.0626582	0.592005	3.8035	4.66269	0.0238898	100
SAVP	17	M	Kos	W-3	KPT	73.92	0.0496	11.84	0.5085	0.0918	0.0376	0.5415	3.8	4.53	0	95.319		77.5501	0.0520358	12.4214	0.533472	0.0963082	0.0394465	0.568092	3.98661	4.75246	0	100
SAVP	17	M	Kos	W-3	KPT	74.06	0.093	12.12	0.5309	0.0012	0.0521	0.5593	3.6	4.46	0	95.4766		77.5687	0.0974061	12.6942	0.556052	0.00125685	0.0545683	0.585798	3.77056	4.6713	0	99.9999
SAVP	17	M	Kos	W-3	KPT	70.34	0.0774	11.45	0.5524	0.0566	0.0743	0.5271	3.15	4.54	0.0209	90.7887		77.4766	0.0852529	12.6117	0.608446	0.0623426	0.0818384	0.580579	3.46959	5.00062	0.0230205	100
SAVP	17	M	Kos	W-3	KPT	74.32	0.0674	12.2	0.5438	0.0448	0.0471	0.5624	3.77	4.45	0.0191	96.0246		77.3968	0.0701903	12.7051	0.566313	0.0466547	0.0490499	0.585683	3.92608	4.63423	0.0198907	100
SAVP	17	M	Kos	W-3	KPT	70.24	0.0486	11.79	0.5355	0.0805	0.0806	0.5355	3.12	4.5	0.0246	90.9553		77.2247	0.0534328	12.9624	0.588751	0.088505	0.088615	0.588751	3.43026	4.94749	0.0270463	100
SAVP	17	M	Kos	W-3	KPT	74.07	0.0938	12.09	0.4724	0.0779	0.0508	0.5512	3.64	4.36	0.0407	95.4469		77.6034	0.0982745	12.6667	0.494935	0.0816161	0.0532233	0.577494	3.81364	4.56798	0.0426415	99.9999
SAVP	17	M	Kos	W-3	KPT	74.45	0.0723	12.16	0.5734	0.0358	0.0527	0.5501	3.54	4.57	0	96.0044		77.5485	0.075309	12.6661	0.597264	0.03729	0.0548933	0.572995	3.68733	4.7602	0	99.9999
SAVP	17	M	Kos	W-3	KPT	74.13	0.0592	12.27	0.6155	0.0061	0.0343	0.5609	3.48	4.43	0	95.5861		77.5531	0.0619337	12.8366	0.643922	0.00638168	0.0358839	0.586801	3.6407	4.63457	0	99.9999
SAVP	17	M	Kos	W-3	KPT	73.95	0.0853	12.52	0.6117	0.0753	0.0573	0.547	3.64	4.5	0.0209	96.0075		77.0252	0.0888472	13.0406	0.637138	0.0784314	0.0596828	0.569747	3.79137	4.68713	0.0217691	100
SAVP	17	M	Kos	W-3	KPT	74.06	0.1022	12.08	0.482	0.1781	0.056	0.5616	3.61	4.51	0.0148	95.6548		77.4242	0.106843	12.6287	0.503895	0.18619	0.0585438	0.587111	3.77399	4.71487	0.0154723	99.9999
SAVP	17	M	Kos	W-3	KPT	73.64	0.1012	12.14	0.4861	0.0265	0.0853	0.5731	2.85	4.37	0	94.2722		78.1142	0.107349	12.8776	0.515635	0.0281101	0.0904827	0.60792	3.02316	4.63551	0	100
SAVP	17	M	Kos	W-3	KPT	74.86	0.0787	12.07	0.6496	0.0676	0.0458	0.5472	3.58	4.48	0.0142	96.3932		77.6611	0.0816448	12.5216	0.673906	0.0701294	0.0475137	0.567675	3.71395	4.64763	0.0147313	99.9999
SAVP	17	M	Milos		Firiplaka	74.9	0.0861	12.12	0.6612	0.1256	0.0632	0.8805	3.56	3.28	0	95.6767		78.2845	0.0899906	12.6677	0.691077	0.131275	0.0660558	0.920287	3.72086	3.42821	0	99.9999
SAVP	17	M	Milos		Firiplaka	74.51	0.0891	12.01	0.6576	0.0825	0.112	0.8792	3.68	3.26	0.0233	95.3038		78.1816	0.0934905	12.6018	0.690004	0.0865653	0.117519	0.922524	3.86134	3.42064	0.0244481	99.9999
SAVP	17	M	Milos		Firiplaka	74.85	0.0819	12.37	0.7197	0.024	0.1365	0.8439	4.03	3.27	0	96.3261		77.7048	0.0850237	12.8418	0.74715	0.0249154	0.141706	0.876087	4.18371	3.39472	0	99.9999
SAVP	17	M	Milos		Firiplaka	75.22	0.1041	12.25	0.7476	0.0674	0.0938	0.8846	3.59	3.28	0.0092	96.2468		78.1532	0.108159	12.7277	0.776753	0.0700283	0.0974578	0.919095	3.72999	3.40791	0.00955876	99.9999
SAVP	17	M	Milos		Firiplaka	74.43	0.0765	12.18	0.7317	0.0441	0.1184	0.888	3.63	3.26	0.0255	95.3842		78.0318	0.080202	12.7694	0.767108	0.0462341	0.12413	0.930972	3.80566	3.41776	0.026734	100
SAVP	17	M	Milos		Firiplaka	74.38	0.1065	12.04	0.7498	0.0368	0.1022	0.8874	3.58	3.2	0.0211	95.1039		78.2092	0.111983	12.6598	0.788401	0.0386945	0.107461	0.933085	3.7643	3.36474	0.0221863	99.9999
SAVP	17	M	Milos		Firiplaka	74.89	0.0948	12.03	0.7471	0.1547	0.1264	0.8634	3.65	3.38	0	95.9365		78.0621	0.0988154	12.5395	0.778744	0.161252	0.131754	0.89997	3.8046	3.52316	0	99.9999
SAVP	17	M	Milos		Firiplaka	73.97	0.0682	11.95	0.7294	0.0993	0.1441	0.8846	3.84	3.22	0	94.9056		77.9406	0.0718609	12.5915	0.768553	0.10463	0.151835	0.932084	4.04613	3.39285	0	100
SAVP	17	M	Milos		Firiplaka	75.1	0.0491	12.26	0.6651	0.0482	0.0737	0.874	3.71	3.3	0.0168	96.097		78.1502	0.0510942	12.7579	0.692113	0.0501577	0.0766933	0.909498	3.86068	3.43403	0.0174823	99.9999
SAVP	17	M	Milos		Firiplaka	75.81	0.1056	12.11	0.7224	0.0728	0.1077	0.8893	3.95	3.35	0.0033	97.1211		78.0572	0.10873	12.469	0.743814	0.074958	0.110892	0.915661	4.06709	3.4493	0.00339782	100
SAVP	17	M	Milos		Firiplaka	75.1	0.0686	12.16	0.558	0.0584	0.1091	0.8686	3.57	3.28	0.0293	95.8021		78.3908	0.0716059	12.6928	0.582451	0.060959	0.113881	0.906661	3.72643	3.42372	0.0305839	99.9999
SAVP	17	M	Milos		Firiplaka	74.86	0.0716	12.13	0.6389	0.0619	0.1238	0.8815	3.7	3.29	0.032	95.7897		78.1504	0.0747471	12.6632	0.666982	0.0646207	0.129241	0.920245	3.86263	3.43461	0.0334065	100
SAVP	17	M	Milos		Firiplaka	74.08	0.0851	12.14	0.7012	0.0133	0.0957	0.9163	3.58	3.23	0	94.8417		78.1091	0.0897285	12.8003	0.739337	0.0140234	0.100905	0.966136	3.77471	3.40567	0	99.9999
SAVP	17	M	Milos		Firiplaka	74.94	0.0962	12.22	0.7834	0.0614	0.0815	0.8583	3.73	3.26	0	96.0309		78.0374	0.100176	12.7251	0.815779	0.0639378	0.0848685	0.893775	3.88417	3.39474	0	99.9999
SAVP	17	M	Milos		Firiplaka	74.51	0.1049	12.17	0.5458	0.0836	0.1099	0.889	3.66	3.25	0.039	95.3623		78.1336	0.110002	12.7619	0.572344	0.0876657	0.115245	0.932234	3.83799	3.40806	0.0408967	99.9999
SAVP	17	M	Milos		Firiplaka	74.19	0.0695	12.25	0.8088	0.0748	0.1198	0.8655	3.67	3.25	0.0623	95.3608		77.7993	0.0728811	12.8459	0.848147	0.0784389	0.125628	0.907606	3.84854	3.40811	0.0653308	99.9999
SAVP	17	M	Milos		Firiplaka	74.93	0.0851	12.46	0.7409	0.0138	0.1153	0.883	3.6	3.29	0	96.1182		77.9561	0.0885368	12.9632	0.770822	0.0143573	0.119956	0.918661	3.74539	3.42287	0	99.9999
SAVP	17	M	Milos		Firiplaka	75.24	0.0984	12.32	0.633	0.0735	0.1144	0.8499	3.41	3.21	0.0266	95.9759		78.3947	0.102526	12.8366	0.659541	0.0765817	0.119197	0.885535	3.55298	3.34459	0.0277153	99.9999
SAVP	17	M	Milos		Firiplaka	74.35	0.0818	12.2	0.6152	0.0588	0.1288	0.8934	3.71	3.26	0.0401	95.3382		77.9855	0.0857998	12.7965	0.645282	0.0616752	0.135098	0.937085	3.89141	3.41941	0.0420608	99.9999
SAVP	17	M	Milos		Firiplaka	77.16	0.1542	12.47	0.7783	0.1262	0.1257	0.9106	4.2	3.34	0.0134	99.2785		77.7208	0.155321	12.5606	0.783956	0.127117	0.126614	0.917218	4.23052	3.36427	0.0134974	99.9999			42.77	5.91	104.96	49.61	17.25	54.86	8.98	3.3	509.74	23.33	48.06	4.65	13.87	2.61	0.408	2.28	0.473	2.54	0.525
SAVP	17	M	Milos		Firiplaka	77.8	0.0843	12.53	0.621	0.0593	0.1583	0.8873	4.01	3.35	0.0078	99.5081		78.1846	0.0847167	12.5919	0.62407	0.0595931	0.159083	0.891686	4.02982	3.36656	0.00783856	99.9999			45.66	6.71	117.89	54.86	18.76	60.34	9.26	3.58	561.38	26.4	53.1	5.23	16.18	2.84	0.51	3.17	0.46	3.08	0.627
SAVP	17	M	Milos		Firiplaka	75.55	0.113	12.33	0.7172	0.0081	0.1365	0.9167	4.1	3.32	0.01	97.2016		77.7251	0.116253	12.685	0.737848	0.0083332	0.14043	0.943091	4.21804	3.41558	0.0102879	99.9999
SAVP	17	M	Milos		Firiplaka	75.26	0.1331	11.96	0.6389	0.0143	0.1293	0.8516	3.88	3.28	0.0201	96.1674		78.2594	0.138404	12.4366	0.664362	0.0148699	0.134453	0.885539	4.03463	3.41072	0.0209011	99.9999
SAVP	17	M	Milos		Firiplaka	75.85	0.1222	12.31	0.6959	0	0.111	0.8899	3.93	3.29	0.0362	97.2353		78.0066	0.125675	12.66	0.715687	0	0.114156	0.915203	4.04174	3.38354	0.0372293	99.9999			47.4	7.35	121.23	55.25	20.16	63.95	10.85	4.52	607.47	25.3	50.3	4.89	16.83	3.29	0.441	2.6	0.374	2.19	0.516
SAVP	17	M	Milos		Firiplaka	77.8	0.0843	12.53	0.621	0.0593	0.1583	0.8873	4.01	3.35	0.0078	99.5081		78.1846	0.0847167	12.5919	0.62407	0.0595931	0.159083	0.891686	4.02982	3.36656	0.00783856	99.9999			46.61	6.72	110.24	49.43	17.21	56.63	9.44	3.39	528.08	24.49	49.96	4.7	14.44	2.48	0.533	2.59	0.34	2.39	0.619
SAVP	17	M	Milos		Firiplaka	75.12	0.1158	12.27	0.7582	0.1099	0.1294	0.8904	3.79	3.08	0.0234	96.2872		78.0166	0.120265	12.7431	0.787436	0.114138	0.13439	0.924734	3.93614	3.19876	0.0243023	99.9999
SAVP	17	M	Milos		Firiplaka	75	0.088	12.06	0.7645	0.0849	0.0948	0.858	3.86	3.24	0	96.0503		78.0841	0.0916187	12.5559	0.795937	0.0883912	0.0986983	0.893282	4.01873	3.37323	0	99.9999
SAVP	17	M	Milos		Firiplaka	76.82	0.1162	12.64	0.6902	0.0192	0.1071	0.9103	4.15	3.35	0.0045	98.8076		77.7471	0.117602	12.7925	0.698529	0.0194317	0.108392	0.921285	4.20008	3.39043	0.00455431	99.9999			48.09	6.44	108.04	50.2	17.45	57.05	8.75	3.17	504.92	23.75	48.26	4.65	14.57	2.82	0.596	2.65	0.342	2.75	0.5
SAVP	17	M	Milos		Firiplaka	75.33	0.1059	12.05	0.7932	0.0236	0.0967	0.8358	3.09	3.31	0.032	95.6673		78.7416	0.110696	12.5957	0.829123	0.0246688	0.101079	0.873653	3.22994	3.45991	0.0334493	99.9999
SAVP	17	M	Milos		Firiplaka	73.98	0.0829	11.24	0.6597	0.0713	0.0736	0.7578	3.52	3.38	0.0168	93.7822		78.8849	0.0883963	11.9852	0.703438	0.0760272	0.0784797	0.808042	3.75338	3.6041	0.0179138	99.9999
SAVP	17	M	Milos		Firiplaka	73.32	0.0788	11.74	0.6346	0.0265	0.117	0.8786	3.39	3.33	0	93.5155		78.4041	0.0842641	12.5541	0.678604	0.0283375	0.125113	0.939523	3.62507	3.56091	0	100
SAVP	17	M	Milos		Firiplaka	75.49	0.0811	12.38	0.6229	0.0257	0.0977	0.8822	3.68	3.48	0.026	96.7657		78.0132	0.0838107	12.7938	0.64372	0.026559	0.100966	0.911687	3.803	3.59632	0.026869	99.9999
SAVP	17	M	Milos		Firiplaka	74.96	0.0788	12.06	0.6007	0.0816	0.1107	0.7776	3.64	3.36	0.0163	95.6857		78.3398	0.082353	12.6038	0.627785	0.0852792	0.115691	0.812661	3.80412	3.5115	0.0170349	100
SAVP	17	M	Milos		Firiplaka	74.53	0.0968	12.29	0.7465	0.0558	0.1207	0.8617	3.7	3.34	0.0266	95.7682		77.8233	0.101077	12.8331	0.779486	0.0582657	0.126033	0.899777	3.8635	3.48759	0.0277754	99.9999
SAVP	17	M	Milos		Firiplaka	74.61	0.0828	12.2	0.7026	0.0823	0.0761	0.8268	3.59	3.41	0.0103	95.591		78.0513	0.086619	12.7627	0.735006	0.086096	0.07961	0.864935	3.75558	3.56728	0.0107751	99.9999
SAVP	17	M	Milos		Firiplaka	71.29	0.0598	11.6	0.6922	0.0497	0.1378	0.8872	3.68	3.33	0.0103	91.7371		77.7112	0.0651863	12.6448	0.754548	0.0541766	0.150212	0.967111	4.01146	3.62994	0.0112277	99.9999
SAVP	17	M	Milos		Firiplaka	74.05	0.0693	12.01	0.62	0.1132	0.1321	0.9085	3.46	3.4	0.0293	94.7925		78.118	0.073107	12.6698	0.65406	0.119419	0.139357	0.958409	3.65008	3.58678	0.0309096	99.9999
SAVP	17	M	Milos		Firiplaka	73.94	0.0915	12.01	0.5842	0.0352	0.1324	0.8813	3.77	3.32	0.0363	94.801		77.995	0.096518	12.6686	0.616238	0.0371304	0.139661	0.929632	3.97675	3.50207	0.0382907	99.9999
SAVP	17	M	Milos		Firiplaka	75.86	0.0827	12.34	0.8024	0.1027	0.1233	0.8857	3.93	3.39	0.0211	97.538		77.7748	0.0847875	12.6515	0.822654	0.105292	0.126412	0.908056	4.0292	3.47557	0.0216326	99.9999
SAVP	17	M	Milos		Firiplaka	75.07	0.104	11.94	0.6753	0.1122	0.1009	0.8622	3.59	3.27	0.0385	95.7631		78.3914	0.108601	12.4683	0.705178	0.117164	0.105364	0.900347	3.74883	3.41468	0.0402034	100
SAVP	17	M	Milos		Firiplaka	74.44	0.088	12.06	0.7084	0.0446	0.0658	0.7993	3.58	3.37	0.0136	95.1698		78.2181	0.0924663	12.6721	0.744354	0.0468636	0.0691396	0.839867	3.7617	3.54104	0.0142902	99.9999
SAVP	17	M	Milos		Firiplaka	74.8	0.0788	12.26	0.8236	0.0518	0.0581	0.877	3.69	3.37	0.0315	96.0409		77.8835	0.0820484	12.7654	0.857551	0.0539354	0.0604951	0.913153	3.84211	3.50892	0.0327985	99.9999
SAVP	17	M	Milos		Firiplaka	74.45	0.0879	12.11	0.7048	0.063	0.0821	0.8512	3.74	3.3	0.0163	95.4053		78.0355	0.0921332	12.6932	0.738743	0.0660341	0.0860539	0.892194	3.92012	3.45893	0.017085	100			46.73	6.1	115.9	50	16.96	53.32	8.87	3.42	497.19	23.59	48.35	4.64	15.64	2.53	0.453	1.99	0.418	2.69	0.583
SAVP	17	M	Milos		Firiplaka	74.36	0.0963	12.19	0.7222	0.1285	0.086	0.8889	3.66	3.33	0.0374	95.4994		77.8644	0.100838	12.7645	0.756235	0.134556	0.0900529	0.930791	3.83248	3.48693	0.0391625	99.9999			41.83	5.44	105.35	44.46	15.46	50.53	8.83	3.14	495.16	22.42	45.82	4.24	13.37	2.92	0.478	2.11	0.375	2.71	0.53
SAVP	17	M	Milos		Firiplaka	74.76	0.066	12.14	0.7176	0.0611	0.1419	0.8385	3.69	3.26	0.0173	95.6925		78.1252	0.0689709	12.6865	0.749902	0.0638504	0.148287	0.876244	3.8561	3.40675	0.0180787	99.9999
SAVP	17	M	Milos		Firiplaka	74.94	0.0937	12.3	0.6175	0.0627	0.1258	0.8097	3.73	3.3	0	95.9795		78.0792	0.097625	12.8152	0.643367	0.0653264	0.13107	0.843618	3.88625	3.43823	0	99.9999			44.69	7.07	115.77	43.68	18.63	60.93	9.34	3.6	544.56	26.22	51.64	5.02	15.43	2.96	0.372	2.94	0.462	3	0.607
SAVP	17	M	Milos		Firiplaka	75.2	0.1078	12.12	0.6271	0.003	0.1086	0.8255	3.68	3.31	0	95.982		78.348	0.112313	12.6274	0.653352	0.00312559	0.113146	0.860057	3.83405	3.44856	0	100			43.77	6.62	113.64	48.12	17.28	56.15	9.61	3.47	523.42	24.56	49.22	4.88	15.69	3.4	0.439	2.67	0.416	2.63	0.471
SAVP	17	M	Milos		Firiplaka	75.9	0.1768	12.31	0.6415	0.0724	0.088	0.8649	3.88	3.42	0.025	97.3787		77.9431	0.181559	12.6414	0.658768	0.0743489	0.0903688	0.888182	3.98444	3.51206	0.025673	99.9999
SAVP	17	M	Milos		Firiplaka	75.77	0.1238	12.46	0.7977	0.068	0.1331	0.871	3.82	3.33	0.0439	97.4176		77.7786	0.127082	12.7903	0.818846	0.0698026	0.136628	0.894089	3.92126	3.41827	0.0450637	99.9999
SAVP	17	M	Milos		Firiplaka	77.74	0.1344	12.58	0.87	0.055	0.1144	0.9247	3.93	3.37	0.01	99.7286		77.9516	0.134766	12.6142	0.872368	0.0551497	0.114711	0.927216	3.9407	3.37917	0.0100272	99.9999
SAVP	17	M	Milos		Firiplaka	77.66	0.1636	12.58	0.8246	0.0048	0.0914	0.8668	4.02	3.39	0.0017	99.603		77.9695	0.164252	12.6301	0.827887	0.00481913	0.0917643	0.870255	4.03602	3.40351	0.00170678	99.9999
SAVP	17	M	Milos		Firiplaka	75.13	0.128	12.16	0.6344	0.0292	0.0935	0.8541	4.12	3.28	0.025	96.4543		77.8918	0.132705	12.607	0.657721	0.0302734	0.0969371	0.885497	4.27145	3.40057	0.025919	99.9999			37.33	5.92	108.8	40.44	16.13	51.82	8.94	3.4	500.59	23.49	49.53	4.52	14.44	2.34	0.341	2.14	0.401	2.47	0.461
SAVP	17	M	Milos		Firiplaka	77.55	0.1261	12.69	0.8425	0.0982	0.094	0.965	3.88	3.42	0.0061	99.672		77.8052	0.126515	12.7318	0.845272	0.0985232	0.0943093	0.968176	3.89277	3.43125	0.00612007	99.9999
SAVP	17	M	Milos		Firiplaka	77.56	0.1559	12.56	0.74	0.0598	0.0972	0.8977	4.07	3.39	0.0056	99.5362		77.9214	0.156626	12.6185	0.743448	0.0600786	0.0976529	0.901883	4.08896	3.4058	0.00562609	100
SAVP	17	M	Milos		Firiplaka	75.53	0.1419	12.1	0.621	0.0505	0.0679	0.8431	4.13	3.27	0.0395	96.7939		78.0318	0.1466	12.5008	0.641569	0.0521727	0.070149	0.871026	4.2668	3.37831	0.0408084	100
SAVP	17	M	Milos		Firiplaka	77.41	0.1243	12.57	0.7426	0.0629	0.0843	0.9226	4.14	3.38	0.0312	99.4679		77.8241	0.124965	12.6372	0.746573	0.0632365	0.084751	0.927535	4.16215	3.39808	0.0313669	100
SAVP	17	M	Milos		Firiplaka	76.05	0.1717	11.98	0.5909	0.0573	0.0978	0.7691	3.78	3.3	0.0301	96.827		78.5421	0.177327	12.3726	0.610264	0.0591777	0.101005	0.794303	3.90387	3.40814	0.0310864	99.9999
SAVP	17	M	Milos		Firiplaka	75.52	0.0847	12.46	0.7693	0.0699	0.1128	0.8518	3.86	3.28	0.0081	97.0167		77.8423	0.0873046	12.8431	0.792956	0.0720495	0.116269	0.877993	3.9787	3.38086	0.00834908	99.9999
SAVP	17	M	Milos		Firiplaka	74.42	0.0712	12.15	0.7337	0.0559	0.1199	0.8751	3.63	3.25	0.0087	95.3146		78.0783	0.0747	12.7473	0.769767	0.0586479	0.125794	0.918117	3.80844	3.40976	0.00912767	99.9999
SAVP	17	M	Milos		Firiplaka	74.7	0.0781	12.08	0.6857	0.0552	0.0774	0.8689	3.48	3.29	0.0656	95.381		78.3175	0.0818821	12.665	0.718906	0.0578732	0.0811482	0.910978	3.64853	3.44932	0.0687768	99.9999
SAVP	17	M	Milos		Firiplaka	74.63	0.0986	12.35	0.6854	0.0445	0.1382	0.8419	3.86	3.37	0.0244	96.0431		77.7047	0.102662	12.8588	0.713638	0.0463334	0.143894	0.876586	4.01903	3.50884	0.0254053	99.9999
SAVP	17	M	Milos		Firiplaka	74.7	0.0835	11.94	0.7275	0.0096	0.0839	0.8623	3.51	3.26	0	95.1768		78.4855	0.0877315	12.5451	0.764367	0.0100865	0.0881517	0.905998	3.68787	3.4252	0	100
SAVP	17	M	Milos		Firiplaka	74.93	0.0795	12.25	0.6255	0.0262	0.1264	0.8335	3.72	3.08	0.0467	95.7179		78.2821	0.0830566	12.798	0.653483	0.0273721	0.132055	0.870788	3.88642	3.21779	0.0487892	99.9999
SAVP	17	M	Milos		Firiplaka	74.4	0.1132	12.25	0.6886	0.0879	0.1398	0.8997	3.46	3.29	0.02	95.3492		78.029	0.118721	12.8475	0.722187	0.0921875	0.146619	0.943584	3.62877	3.45047	0.0209755	100
SAVP	17	M	Milos		Firiplaka	74.56	0.0917	12.19	0.751	0.0612	0.1296	0.8751	3.67	3.3	0.0119	95.6406		77.9585	0.0958798	12.7456	0.785231	0.0639896	0.135507	0.914988	3.83728	3.45042	0.0124424	99.9999
SAVP	17	M	Milos		Firiplaka	74.86	0.1087	12.09	0.725	0.0223	0.112	0.7803	3.82	2.77	0.0336	95.322		78.5338	0.114035	12.6833	0.76058	0.0233944	0.117496	0.818594	4.00747	2.90594	0.0352489	99.9999
SAVP	17	M	Milos		Firiplaka	74.84	0.0853	12.06	0.712	0.0648	0.0833	0.8905	3.66	3.28	0.0092	95.6851		78.2149	0.0891466	12.6038	0.744107	0.0677221	0.0870564	0.930657	3.82505	3.42791	0.00961487	100
SAVP	17	M	Milos		Firiplaka	74.83	0.0798	12.39	0.6876	0.0609	0.1279	0.8605	3.78	3.22	0.0168	96.0536		77.9044	0.0830786	12.899	0.71585	0.0634021	0.133155	0.895854	3.9353	3.35229	0.0174902	99.9999
SAVP	17	M	Milos		Firiplaka	75.1	0.0673	12.38	0.7802	0.1212	0.1232	0.8748	3.77	3.3	0.0357	96.5524		77.7816	0.0697031	12.8221	0.808059	0.125528	0.127599	0.906037	3.90462	3.41783	0.0369747	100
SAVP	17	M	Milos		Firiplaka	74.51	0.1088	12.21	0.7383	0.0832	0.1051	0.8784	3.78	3.33	0.0287	95.7726		77.7989	0.113602	12.7489	0.770889	0.0868724	0.109739	0.917173	3.94685	3.47699	0.0299668	99.9999
SAVP	17	M	Milos		Firiplaka	74.75	0.0842	12.03	0.6533	0.1236	0.1301	0.8498	3.4	3.28	0.045	95.346		78.3987	0.0883099	12.6172	0.685189	0.129633	0.13645	0.89128	3.56596	3.4401	0.0471965	100
SAVP	17	M	Milos		Firiplaka	74.72	0.0989	12.16	0.7031	0.0222	0.1166	0.8521	3.85	3.23	0.0368	95.7897		78.0042	0.103247	12.6945	0.734004	0.0231758	0.121725	0.889553	4.01922	3.37197	0.0384175	100
SAVP	17	M	Milos		Firiplaka	74.73	0.0715	12.38	0.6838	0.06	0.097	0.8456	3.69	3.37	0	95.9279		77.9023	0.0745351	12.9055	0.712827	0.062547	0.101118	0.881495	3.84664	3.51306	0	100
SAVP	17	M	Milos		Firiplaka	74.64	0.0863	12.05	0.7338	0.0878	0.1401	0.8858	3.74	3.29	0.0038	95.6577		78.0282	0.0902175	12.597	0.76711	0.0917856	0.14646	0.92601	3.90977	3.43935	0.0039725	99.9999
SAVP	17	M	Milos		Firiplaka	74.34	0.0999	12.18	0.6688	0.0784	0.1075	0.8873	3.74	3.28	0.0016	95.3835		77.938	0.104735	12.7695	0.701169	0.0821945	0.112703	0.930245	3.92101	3.43875	0.00167744	100
SAVP	17	M	Milos		Firiplaka	76.36	0.1345	12.25	0.7561	0.0258	0.1316	0.922	4.07	3.42	0.0111	98.0812		77.8539	0.137131	12.4897	0.770892	0.0263047	0.134175	0.940037	4.14962	3.48691	0.0113172	99.9999			48.5	7.25	127.47	59.35	20.49	63.82	9.92	3.95	623.42	29.83	57.58	5.59	16.37	3.66	0.569	2.97	0.523	3.29	0.624
SAVP	17	M	Milos		Firiplaka	75.8	0.1124	11.67	0.7784	0.0243	0.1135	0.8214	3.87	3.32	0.0028	96.5129		78.5387	0.116461	12.0916	0.806524	0.025178	0.117601	0.851078	4.00983	3.43995	0.00290117	99.9999
SAVP	17	M	Milos		Firiplaka	75.07	0.1409	12.2	0.652	0.0577	0.085	0.9041	3.92	3.31	0.0368	96.3765		77.8924	0.146197	12.6587	0.676513	0.0598694	0.0881958	0.938092	4.06738	3.43445	0.0381836	100
SAVP	17	M	Milos		Firiplaka	75.1	0.0997	12.25	0.7511	0.1127	0.1085	0.8669	4.06	3.16	0.0189	96.5278		77.8014	0.103286	12.6906	0.778118	0.116754	0.112403	0.898083	4.20604	3.27367	0.0195799	100			48.97	6.31	109.21	48.38	17.23	56.57	9.26	3.45	539.63	24.54	49.1	4.7	15.37	2.87	0.388	2.31	0.418	2.42	0.601
SAVP	17	M	Milos		Firiplaka	75.58	0.1356	12.32	0.8275	0.0711	0.1279	0.8945	3.78	3.3	0.0222	97.0589		77.8702	0.139709	12.6933	0.852575	0.0732545	0.131776	0.921605	3.89454	3.4	0.0228727	99.9999
SAVP	17	M	Milos		Firiplaka	75.19	0.1213	12.38	0.7231	0.0188	0.1347	0.8687	3.91	3.26	0.0323	96.6389		77.8051	0.125519	12.8106	0.748249	0.0194539	0.139385	0.898913	4.04599	3.37338	0.0334234	100
SAVP	17	M	Milos		Firiplaka	75.7	0.1619	12.31	0.7571	0.0369	0.098	0.8537	4.03	3.33	0.0117	97.2894		77.8091	0.166411	12.653	0.778194	0.0379281	0.10073	0.877485	4.14228	3.42278	0.012026	99.9999
SAVP	17	M	Milos		Firiplaka	75.06	0.1211	12.17	0.7306	0	0.1254	0.9071	4.01	3.32	0.035	96.4792		77.7992	0.125519	12.6141	0.757262	0	0.129976	0.940203	4.15634	3.44116	0.0362772	100			44.12	5.92	114.24	51.92	17.59	54.73	9.39	3.52	542.81	25.16	49.87	4.83	14.63	3.18	0.503	2.39	0.45	2.56	0.562
SAVP	17	M	Milos		Firiplaka	75.07	0.1207	12.09	0.725	0.0724	0.1034	0.9098	4.06	3.3	0	96.4513		77.832	0.125141	12.5348	0.751675	0.0750638	0.107204	0.943274	4.20938	3.42142	0	100			47.88	6.62	128.23	54.88	18.77	60.73	9.47	3.46	576.54	26.84	52.52	5.02	16.54	2.38	0.473	2.83	0.485	2.9	0.62
ITALIAN	11	T	Campi Flegrei	CI Y-5	Campanian Ignimbrite	61.81	0.44	19.04	2.9	0.2	0.33	1.75	6.12	6.81		99.4		62.1831	0.442656	19.1549	2.91751	0.201207	0.331992	1.76056	6.15694	6.85111		100					478.716	34.0777	55.5751	679.857	123.073		25.4502	131.433	241.32	24.9428	86.7222	15.4554	1.31197	11.3078		9.99052
ITALIAN	11	T	Campi Flegrei	CI Y-5	Campanian Ignimbrite	61.51	0.4	18.74	2.92	0.26	0.31	1.7	6.45	7.09		99.38		61.8937	0.402495	18.8569	2.93822	0.261622	0.311934	1.71061	6.49024	7.13423		100					455.319	22.8749	55.6279	662.818	120.74		17.0652	128.391	238.757	24.696	85.8004	15.42	1.34327	10.7479		9.84955
ITALIAN	11	T	Campi Flegrei	CI Y-5	Campanian Ignimbrite	61.38	0.43	18.93	3.05	0.22	0.31	1.66	6.43	6.95		99.36		61.7754	0.43277	19.0519	3.06965	0.221417	0.311997	1.67069	6.47142	6.99477		100					452.334	22.8739	54.4066	664.467	121.062		17.0447	128.122	240.595	24.7762	86.2036	14.5308	1.40749	10.8096		9.67309
ITALIAN	11	T	Campi Flegrei	CI Y-5	Campanian Ignimbrite	61.49	0.42	18.71	2.86	0.25	0.31	1.72	6.53	7.05		99.34		61.8985	0.42279	18.8343	2.879	0.251661	0.31206	1.73143	6.57338	7.09684		100
ITALIAN	11	T	Campi Flegrei	CI Y-5	Campanian Ignimbrite	61.37	0.4	18.69	2.9	0.25	0.33	1.83	6.13	7.43		99.33		61.784	0.402698	18.8161	2.91956	0.251686	0.332226	1.84234	6.17135	7.48012		100					484.457	45.6189	59.9519	707.014	133.459		31.61	139.657	241.371	27.4689	96.3027	16.7694	1.36099	11.3412		10.8914
ITALIAN	11	T	Campi Flegrei	CI Y-5	Campanian Ignimbrite	61.3	0.4	18.85	2.8	0.28	0.29	1.8	6.16	7.5		99.38		61.6824	0.402495	18.9676	2.81747	0.281747	0.291809	1.81123	6.19843	7.54679		100
ITALIAN	11	T	Campi Flegrei	CI Y-5	Campanian Ignimbrite	61.35	0.39	18.85	3.03	0.22	0.34	1.9	6.1	7.19		99.37		61.739	0.392473	18.9695	3.04921	0.221395	0.342156	1.91205	6.13867	7.23558		100					476.941	28.3738	55.5101	663.858	122.082		22.8734	128.417	241.594	24.2048	84.5791	14.7164	1.31371	10.6226		9.98226
ITALIAN	11	T	Campi Flegrei	CI Y-5	Campanian Ignimbrite	62.01	0.42	18.97	2.65	0.2	0.32	1.76	6.08	6.95		99.36		62.4094	0.422705	19.0922	2.66707	0.201288	0.322061	1.77134	6.11916	6.99477		100					472.215	26.7552	53.9283	647.084	119.106		22.3311	124.329	235.222	23.968	84.9205	14.2513	1.31334	10.7672		9.77734
ITALIAN	11	T	Campi Flegrei	CI Y-5	Campanian Ignimbrite	61.56	0.45	18.99	2.85	0.23	0.31	1.78	6.3	6.94		99.41		61.9254	0.452671	19.1027	2.86691	0.231365	0.31184	1.79056	6.33739	6.98119		100					469.879	31.2081	56.8615	685.105	123.682		23.7878	131.783	241.626	25.1201	86.2973	15.672	1.36526	11.6275		9.7359
ITALIAN	11	T	Campi Flegrei	CI Y-5	Campanian Ignimbrite	61.52	0.44	18.76	2.92	0.21	0.33	1.73	6.35	7.12		99.38		61.9038	0.442745	18.877	2.93822	0.21131	0.332059	1.74079	6.38962	7.16442		100					470.651	21.9999	56.336	674.406	123.612		16.3508	130.143	245.468	24.7667	84.6157	14.9893	1.3429	10.5612		9.89905
ITALIAN	11	T	Campi Flegrei	CI Y-5	Campanian Ignimbrite	61.64	0.4	18.81	2.7	0.26	0.31	1.81	6.48	6.94		99.35		62.0433	0.402617	18.9331	2.71766	0.261701	0.312028	1.82184	6.5224	6.98541		100					463.814	21.9337	56.4796	679.825	121.851		17.0112	129.374	246.897	25.1971	86.7566	14.8663	1.31479	11.0483		10.1068
ITALIAN	11	T	Campi Flegrei	CI Y-5	Campanian Ignimbrite	61.58	0.39	18.98	2.86	0.22	0.31	1.76	6.46	6.79		99.35		61.9829	0.392552	19.1042	2.87871	0.221439	0.312028	1.77151	6.50226	6.83442		100					470.771	83.5543	49.7218	597.869	105.963		94.8908	115.603	209.812	21.5419	76.4153	13.6434	1.14227	9.06676		8.59804
ITALIAN	11	T	Campi Flegrei	CI Y-5	Campanian Ignimbrite	61.16	0.41	19	2.88	0.26	0.31	1.72	6.6	7.03		99.37		61.5478	0.412599	19.1205	2.89826	0.261648	0.311965	1.7309	6.64184	7.07457		100					475.881	42.3324	51.208	638.362	117.979		35.3237	119.948	216.941	23.1437	78.701	13.3303	1.14394	9.55787		9.08934
ITALIAN	11	T	Campi Flegrei	CI Y-5	Campanian Ignimbrite	61.73	0.4	18.84	2.77	0.25	0.32	1.66	6.47	6.93		99.37		62.1214	0.402536	18.9594	2.78756	0.251585	0.322029	1.67052	6.51102	6.97394		100					459.033	22.2945	54.0696	672.942	121.301		17.9041	127.483	244.981	24.7531	83.3586	14.9401	1.3061	11.2696		9.7622
ITALIAN	11	T	Campi Flegrei	CI Y-5	Campanian Ignimbrite	61.38	0.41	19.07	2.96	0.21	0.34	1.71	6.01	7.31		99.4		61.7505	0.412475	19.1851	2.97787	0.211268	0.342052	1.72032	6.04628	7.35412		100
ITALIAN	11	T	Campi Flegrei	CI Y-5	Campanian Ignimbrite	61	0.45	19.11	2.94	0.24	0.34	1.77	6.45	7.01		99.31		61.4238	0.453127	19.2428	2.96043	0.241668	0.342362	1.7823	6.49481	7.05871		100
ITALIAN	11	T	Campi Flegrei	CI Y-5	Campanian Ignimbrite	61.19	0.44	18.99	2.82	0.26	0.33	1.69	6.58	7.07		99.37		61.5779	0.44279	19.1104	2.83788	0.261648	0.332092	1.70071	6.62172	7.11482		100					486.779	35.9669	54.3605	660.22	119.638		32.7064	127.705	238.271	24.6592	84.7029	15.2153	1.23098	11.084		9.96343
ITALIAN	11	T	Campi Flegrei	CI Y-5	Campanian Ignimbrite	61.27	0.47	18.78	2.86	0.25	0.33	1.81	6.3	7.28		99.35		61.6709	0.473075	18.9029	2.87871	0.251636	0.332159	1.82184	6.34122	7.32763		100					441.551	30.2433	52.7667	659.131	119.625		14.9867	120.734	229.347	23.1014	79.8767	14.2199	1.2679	10.7905		9.6041
ITALIAN	11	T	Campi Flegrei	CI Y-5	Campanian Ignimbrite	61.23	0.46	19.06	2.87	0.27	0.28	1.87	6.06	7.27		99.37		61.6182	0.462916	19.1808	2.8882	0.271712	0.281775	1.88186	6.09842	7.31609		100					445.891	52.8616	51.4551	678.388	119.841		21.1017	118.686	214.381	22.3935	78.0614	13.3912	0.984274	10.4916		9.12053
ITALIAN	11	T	Campi Flegrei	CI Y-5	Campanian Ignimbrite	61.1	0.46	18.95	2.87	0.25	0.36	1.71	6.36	7.32		99.38		61.4812	0.46287	19.0682	2.88791	0.25156	0.362246	1.72067	6.39968	7.36567		100					456.088	20.9457	53.5968	656.779	118.559		13.653	124.06	236.974	23.7971	82.2278	13.9914	1.3147	10.9698		9.66819
ITALIAN	11	T	Campi Flegrei	CI Y-5	Campanian Ignimbrite	61.34	0.46	18.76	2.97	0.23	0.29	1.73	6.29	7.28		99.35		61.7413	0.46301	18.8827	2.98943	0.231505	0.291897	1.74132	6.33115	7.32763		100					420.116	65.0777	49.1509	659.501	119.148		32.3065	114.647	200.243	21.8474	73.3217	13.3518	1.1032	10.1165		8.52994
ITALIAN	11	T	Campi Flegrei	CI Y-5	Campanian Ignimbrite	60.89	0.46	19.5	2.95	0.24	0.34	1.78	6.11	7.14		99.41		61.2514	0.46273	19.6157	2.96751	0.241424	0.342018	1.79056	6.14626	7.18238		100					442.324	36.0668	48.816	629.499	114.776		15.1131	112.063	210.02	21.3537	72.8103	13.1451	0.924533	10.2065		8.61933
ITALIAN	11	T	Campi Flegrei	CI Y-5	Campanian Ignimbrite	60.83	0.47	19.35	2.93	0.19	0.32	1.71	6.18	7.35		99.33		61.2403	0.47317	19.4805	2.94976	0.191282	0.322158	1.72153	6.22169	7.39958		100					507.018	45.4886	51.4327	660.731	119.697		23.5253	120.745	227.711	23.9963	83.844	14.0615	1.14773	10.6843		8.31456
ITALIAN	11	T	Campi Flegrei	CI Y-5	Campanian Ignimbrite	60.98	0.46	18.92	2.95	0.23	0.37	1.58	6.33	7.55		99.37		61.3666	0.462916	19.04	2.9687	0.231458	0.372346	1.59002	6.37013	7.59787		100					481.024	49.5586	49.3232	617.555	115.582		29.406	114.305	217.439	22.4555	76.1645	13.0168	1.2869	9.99857		8.79254
ITALIAN	11	T	Campi Flegrei	CI Y-5	Campanian Ignimbrite	60.82	0.5	19.52	2.97	0.23	0.31	1.63	5.89	7.49		99.36		61.2118	0.503221	19.6457	2.98913	0.231481	0.311997	1.6405	5.92794	7.53824		100					472.875	32.5574	52.2131	649.635	118.645		22.0786	124.61	234.502	23.5917	84.0251	14.6923	1.34682	10.1544		9.6638
ITALIAN	11	T	Campi Flegrei	CI Y-5	Campanian Ignimbrite	61.26	0.45	19.12	2.89	0.24	0.34	1.71	5.96	7.4		99.37		61.6484	0.452853	19.2412	2.90832	0.241522	0.342156	1.72084	5.99779	7.44692		100					468.688	29.1562	49.7533	601.497	112.371		18.6572	115.415	219.552	21.968	79.0511	13.7225	1.24337	10.4349		9.49984
ITALIAN	11	T	Campi Flegrei	CI Y-5	Campanian Ignimbrite	60.82	0.48	19.02	2.89	0.24	0.39	1.84	5.8	7.9		99.38		61.1994	0.482995	19.1387	2.90803	0.241497	0.392433	1.85148	5.83618	7.94929		100
ITALIAN	14	M	Campi Flegrei	CI Y-5	Campanian Ignimbrite	60.71	0.3	17.27	2.96	0.09	0.43	1.96	5.28	7.51		96.51		62.9054	0.310849	17.8945	3.06704	0.0932546	0.44555	2.03088	5.47094	7.78158		100
ITALIAN	14	M	Campi Flegrei	CI Y-5	Campanian Ignimbrite	59.54	0.48	17.12	2.68	0.19	0.29	1.64	6.61	7.04		95.59		62.2869	0.502145	17.9098	2.80364	0.198766	0.303379	1.71566	6.91495	7.36479		100
ITALIAN	14	M	Campi Flegrei	CI Y-5	Campanian Ignimbrite	58.75	0.44	17.12	2.93	0.2	0.32	1.72	6.29	7.02		94.79		61.9791	0.464184	18.061	3.09104	0.210993	0.337588	1.81454	6.63572	7.40584		100					484.468	20.3042	49.0962	598.2	120.712		16.5913	118.092	234.913	23.0656	77.4322	15.6953		12.2862		8.81337
ITALIAN	14	M	Campi Flegrei	CI Y-5	Campanian Ignimbrite	59.25	0.48	17.26	3.18	0.19	0.3	1.68	6.62	6.76		95.72		61.8993	0.501463	18.0318	3.32219	0.198496	0.313414	1.75512	6.91601	7.06226		100
ITALIAN	14	M	Campi Flegrei	CI Y-5	Campanian Ignimbrite	59.63	0.42	17.19	2.89	0.16	0.28	1.64	6.85	6.79		95.85		62.2118	0.438185	17.9343	3.01513	0.166927	0.292123	1.71101	7.14658	7.08399		100
ITALIAN	14	M	Campi Flegrei	CI Y-5	Campanian Ignimbrite	59.84	0.37	16.81	3.11	0.11	0.64	2.36	5.27	6.8		95.31		62.7846	0.388207	17.6372	3.26304	0.115413	0.671493	2.47613	5.52933	7.13461		100
ITALIAN	14	M	Campi Flegrei	CI Y-5	Campanian Ignimbrite	58.84	0.43	17.23	2.98	0.24	0.32	1.74	6.24	7		95.02		61.9238	0.452536	18.133	3.13618	0.252578	0.336771	1.83119	6.56704	7.36687		100
ITALIAN	14	M	Campi Flegrei	CI Y-5	Campanian Ignimbrite	60.01	0.38	17.44	3.09	0.17	0.31	1.66	6.66	7.18		96.9		61.9298	0.392157	17.9979	3.18885	0.175439	0.319917	1.71311	6.87307	7.4097		100
ITALIAN	14	M	Campi Flegrei	CI Y-5	Campanian Ignimbrite	60.05	0.4	17.32	3.06	0.16	0.33	1.75	6.29	7.19		96.55		62.1958	0.414293	17.9389	3.16934	0.165717	0.341792	1.81253	6.51476	7.44692		100					493.279	20.8899	56.2115	692.9	128.456		15.1614	134.51	258.973	26.5943	90.2685	17.4266	1.54019	10.68		10.2522
ITALIAN	14	M	Campi Flegrei	CI Y-5	Campanian Ignimbrite	57.19	0.92	16.95	5.3	0.07	2.19	5.03	3.4	6.08		97.13		58.8799	0.947184	17.4508	5.4566	0.0720684	2.25471	5.17863	3.50046	6.25965		100
ITALIAN	14	M	Campi Flegrei	CI Y-5	Campanian Ignimbrite	58.48	0.39	17.73	2.93	0.2	0.28	1.78	5.91	6.93		94.63		61.7986	0.412131	18.7361	3.09627	0.211349	0.295889	1.88101	6.24538	7.32326		100
ITALIAN	14	M	Campi Flegrei	CI Y-5	Campanian Ignimbrite	56.89	0.39	16.71	2.74	0.06	0.45	2.14	3.56	8.28		91.22		62.3657	0.427538	18.3184	3.00373	0.065775	0.493313	2.34598	3.90265	9.07696		100
ITALIAN	14	M	Campi Flegrei	CI Y-5	Campanian Ignimbrite	59.48	0.44	17.5	2.99	0.41	0.3	1.65	6.47	7.07		96.31		61.7589	0.456858	18.1705	3.10456	0.425709	0.311494	1.71322	6.71789	7.34088		100
ITALIAN	14	M	Campi Flegrei	CI Y-5	Campanian Ignimbrite	59.76	0.45	17.99	3.02	0.25	0.32	1.7	6.52	7.04		97.05		61.5765	0.463679	18.5368	3.1118	0.257599	0.329727	1.75167	6.71819	7.25399		100
ITALIAN	14	M	Campi Flegrei	CI Y-5	Campanian Ignimbrite	58.93	0.4	17.19	2.83	0.27	0.28	1.75	6.47	6.79		94.91		62.0904	0.421452	18.1119	2.98177	0.28448	0.295016	1.84385	6.81698	7.15415		100					486.733	20.0536	55.2947	673.7	123.145		16.7823	132.612	248.471	23.9867	82.6333	14.5323	1.40208	10.5454		10.0135
ITALIAN	14	M	Campi Flegrei	CI Y-5	Campanian Ignimbrite	59.75	0.47	17.38	2.98	0.19	0.28	1.8	6.64	7.22		96.71		61.7826	0.485989	17.9713	3.08138	0.196464	0.289525	1.86123	6.86589	7.46562		100					479.973	21.3709	59.0305	714.7	130.932		15.2674	139.389	266.819	26.6444	90.4069	16.1863	1.4408	11.3279		10.5632
ITALIAN	14	M	Campi Flegrei	CI Y-5	Campanian Ignimbrite	59.73	0.46	17.54	2.79	0.24	0.3	1.59	5.95	8.28		96.88		61.6536	0.474814	18.1049	2.87985	0.247729	0.309661	1.64121	6.14162	8.54666		100
ITALIAN	14	M	Campi Flegrei	CI Y-5	Campanian Ignimbrite	58.68	0.42	16.93	3.11	0.31	0.29	1.69	6.36	6.87		94.66		61.9903	0.443693	17.8851	3.28544	0.327488	0.30636	1.78534	6.71878	7.25755		100					456.837	19.7361	47.2189	580.2	118.537		14.8309	112.661	221.311	21.2251	75.2074	13.9767	1.21941	9.90794		7.65979
ITALIAN	14	M	Campi Flegrei	CI Y-5	Campanian Ignimbrite	58.38	0.37	16.44	2.75	0.23	0.35	1.75	6.2	6.9		93.37		62.5254	0.396273	17.6074	2.94527	0.246332	0.374853	1.87426	6.64025	7.38995		100
ITALIAN	14	M	Campi Flegrei	CI Y-5	Campanian Ignimbrite	58.2	0.42	17.27	2.87	0.3	0.31	1.76	5.9	7.26		94.29		61.7245	0.445434	18.3158	3.0438	0.318167	0.328773	1.86658	6.25729	7.69965		100
ITALIAN	14	M	Campi Flegrei	CI Y-5	Campanian Ignimbrite	59.42	0.41	17.03	3	0.15	0.51	2.08	4.8	7.83		95.23		62.3963	0.430537	17.883	3.15027	0.157513	0.535546	2.18419	5.04043	8.2222		100
ITALIAN	14	M	Campi Flegrei	CI Y-5	Campanian Ignimbrite	58.42	0.37	16.77	2.76	0.32	0.33	1.67	6.28	6.71		93.63		62.3945	0.395172	17.9109	2.94777	0.341771	0.352451	1.78362	6.70725	7.16651		100
ITALIAN	14	M	Campi Flegrei	CI Y-5	Campanian Ignimbrite	58.74	0.42	17.36	2.79	0.26	0.28	1.84	6.14	6.77		94.6		62.093	0.443975	18.351	2.94926	0.274841	0.295983	1.94503	6.49049	7.15645		100
ITALIAN	14	M	Campi Flegrei	CI Y-5	Campanian Ignimbrite	59.11	0.39	16.89	2.83	0.1	0.54	2.08	4.83	7.68		94.45		62.5834	0.412917	17.8825	2.99629	0.105876	0.571731	2.20222	5.11382	8.13129		100
ITALIAN	18	M	Campi Flegrei	CI Y-5	Campanian Ignimbrite	60.96	0.34	18.75	3.25	0.16	0.63	2.22	4.78	7.8	0.23	99.12		61.5012	0.343019	18.9165	3.27885	0.161421	0.635593	2.23971	4.82244	7.86925	0.232042	100
ITALIAN	18	M	Campi Flegrei	CI Y-5	Campanian Ignimbrite	60.71	0.47	19.08	3.3	0.13	0.35	1.81	5.58	7.17	0.2	98.8		61.4474	0.475709	19.3117	3.34008	0.131579	0.354251	1.83198	5.64777	7.25709	0.202429	100
ITALIAN	18	M	Campi Flegrei	CI Y-5	Campanian Ignimbrite	58.79	0.42	18.78	3.48	0.09	0.66	2.65	3.59	8.21	0.14	96.81		60.7272	0.433839	19.3988	3.59467	0.0929656	0.681748	2.73732	3.70829	8.48053	0.144613	100
ITALIAN	18	M	Campi Flegrei	CI Y-5	Campanian Ignimbrite	60.1	0.3	18.57	2.79	0.13	0.55	2.06	3.8	8.71	0.28	97.29		61.7741	0.308356	19.0873	2.86772	0.133621	0.56532	2.11738	3.90585	8.95262	0.287799	100
ITALIAN	18	M	Campi Flegrei	CI Y-5	Campanian Ignimbrite	60.19	0.42	19.1	3.06	0.33	0.32	1.81	5.49	7.56	0.15	98.43		61.1501	0.426699	19.4047	3.10881	0.335264	0.325104	1.83887	5.57757	7.68059	0.152393	100
ITALIAN	18	M	Campi Flegrei	CI Y-5	Campanian Ignimbrite	60.77	0.44	19.34	3.01	0.35	0.39	1.91	5.84	7.3	0.11	99.46		61.0999	0.442389	19.445	3.02634	0.3519	0.392117	1.92037	5.87171	7.33963	0.110597	100
ITALIAN	18	M	Campi Flegrei	CI Y-5	Campanian Ignimbrite	60.74	0.41	19.21	3.01	0.28	0.34	1.86	6.04	7.4	0.01	99.3		61.1682	0.41289	19.3454	3.03122	0.281974	0.342397	1.87311	6.08258	7.45217	0.0100705	100
ITALIAN	18	M	Campi Flegrei	CI Y-5	Campanian Ignimbrite	61.1	0.45	19.4	3.11	0.18	0.37	1.8	6.21	7.18	0.09	99.89		61.1673	0.450496	19.4214	3.11342	0.180198	0.370407	1.80198	6.21684	7.18791	0.0900991	100
ITALIAN	18	M	Campi Flegrei	CI Y-5	Campanian Ignimbrite	61.09	0.47	19.26	3.03	0.24	0.36	1.84	6.32	7.16	0.16	99.93		61.1328	0.470329	19.2735	3.03212	0.240168	0.360252	1.84129	6.32443	7.16502	0.160112	100
ITALIAN	18	M	Campi Flegrei	CI Y-5	Campanian Ignimbrite	59.69	0.4	18.95	3	0.18	0.38	1.87	4.99	6.83	0.04	96.33		61.9641	0.415239	19.672	3.11429	0.186858	0.394477	1.94124	5.18011	7.09021	0.0415239	100
ITALIAN	18	M	Campi Flegrei	CI Y-5	Campanian Ignimbrite	61.06	0.42	19.49	2.99	0.31	0.37	1.7	5.7	7.27	0	99.31		61.4842	0.422918	19.6254	3.01077	0.312154	0.372571	1.71181	5.7396	7.32051	0	100
ITALIAN	18	M	Campi Flegrei	CI Y-5	Campanian Ignimbrite	61.98	0.38	18.86	3.09	0.21	0.45	1.91	5.18	8.29	0.05	100.4		61.7331	0.378486	18.7849	3.07769	0.209163	0.448207	1.90239	5.15936	8.25697	0.0498008	100
ITALIAN	18	M	Campi Flegrei	CI Y-5	Campanian Ignimbrite	60.3	0.48	18.82	3.03	0.27	0.37	1.71	5.64	7.15	0.01	97.78		61.6691	0.490898	19.2473	3.09879	0.27613	0.3784	1.74882	5.76805	7.31233	0.010227	100
ITALIAN	18	M	Campi Flegrei	CI Y-5	Campanian Ignimbrite	60.87	0.39	18.99	3.49	0.03	0.63	2.38	4.82	7.42	0.06	99.08		61.4352	0.393621	19.1663	3.52241	0.0302786	0.63585	2.4021	4.86476	7.4889	0.0605571	100
ITALIAN	18	M	Campi Flegrei	CI Y-5	Campanian Ignimbrite	60.83	0.4	19.04	2.97	0.25	0.36	1.76	6.08	6.9	0.05	98.64		61.6687	0.405515	19.3025	3.01095	0.253447	0.364964	1.78427	6.16383	6.99513	0.0506894	100
ITALIAN	18	M	Campi Flegrei	CI Y-5	Campanian Ignimbrite	60.18	0.41	19.11	3.06	0.25	0.36	1.79	5.04	7.14	0.14	97.48		61.7357	0.420599	19.604	3.13911	0.256463	0.369307	1.83627	5.17029	7.32458	0.143619	100
ITALIAN	18	M	Campi Flegrei	CI Y-5	Campanian Ignimbrite	60.21	0.45	18.99	3.03	0.18	0.36	1.75	5.55	7.66	0.06	98.24		61.2887	0.458062	19.3302	3.08428	0.183225	0.36645	1.78135	5.64943	7.79723	0.0610749	100
ITALIAN	18	M	Campi Flegrei	CI Y-5	Campanian Ignimbrite	59.56	0.42	19.17	3.22	0.24	0.33	1.81	5.24	7.49	0.11	97.59		61.0308	0.430372	19.6434	3.29952	0.245927	0.338149	1.8547	5.3694	7.67497	0.112716	100
ITALIAN	18	M	Campi Flegrei	CI Y-5	Campanian Ignimbrite	59.72	0.5	19	3.14	0.33	0.35	1.68	5.25	8.12	0.03	98.12		60.8642	0.50958	19.364	3.20016	0.336323	0.356706	1.71219	5.35059	8.27558	0.0305748	100
ITALIAN	18	M	Campi Flegrei	CI Y-5	Campanian Ignimbrite	60.13	0.41	18.96	2.91	0.32	0.33	1.67	5.53	6.87	0.14	97.27		61.8176	0.421507	19.4921	2.99167	0.328981	0.339262	1.71687	5.68521	7.06281	0.143929	100
ITALIAN	18	M	Campi Flegrei	CI Y-5	Campanian Ignimbrite	59.99	0.38	19.16	2.85	0.17	0.36	1.81	5.55	7.16	0.12	97.55		61.4967	0.389544	19.6412	2.92158	0.17427	0.369042	1.85546	5.68939	7.33983	0.123014	100
ITALIAN	18	M	Campi Flegrei	CI Y-5	Campanian Ignimbrite	60.51	0.4	19.36	3.24	0.33	0.35	1.83	5.94	7.74	0.12	99.82		60.6191	0.400721	19.3949	3.24584	0.330595	0.350631	1.8333	5.95071	7.75396	0.120216	100
ITALIAN	18	M	Campi Flegrei	CI Y-5	Campanian Ignimbrite	59.47	0.4	19.14	3.02	0.27	0.32	1.86	5.15	7.09	0	96.72		61.4868	0.413565	19.7891	3.12242	0.279156	0.330852	1.92308	5.32465	7.33044	0	100
ITALIAN	19	M	Campi Flegrei	CI Y-5	Campanian Ignimbrite	59.93	0.4	18.16	2.53	0.2	0.29	1.7	6.32	6.9	0.06	96.49		62.1101	0.414551	18.8206	2.62203	0.207275	0.300549	1.76184	6.5499	7.151	0.0621826	100
ITALIAN	19	M	Campi Flegrei	CI Y-5	Campanian Ignimbrite	59.33	0.4	17.98	2.59	0.23	0.36	1.68	5.92	6.75	0.09	95.33		62.2364	0.419595	18.8608	2.71688	0.241267	0.377636	1.7623	6.21001	7.08067	0.0944089	100
ITALIAN	19	M	Campi Flegrei	CI Y-5	Campanian Ignimbrite	59.13	0.38	18.03	2.65	0.2	0.33	1.64	6.02	7.01	0.04	95.43		61.9616	0.398198	18.8934	2.7769	0.209578	0.345803	1.71854	6.30829	7.3457	0.0419155	100
ITALIAN	19	M	Campi Flegrei	CI Y-5	Campanian Ignimbrite	60.33	0.34	17.98	2.84	0.13	0.66	2.35	3.87	9.03	0.12	97.65		61.7819	0.348182	18.4127	2.90835	0.133129	0.675883	2.40655	3.96313	9.24731	0.122888	100
ITALIAN	19	M	Campi Flegrei	CI Y-5	Campanian Ignimbrite	61.31	0.35	18.27	2.54	0.13	0.49	2.03	5.11	7.64	0.1	97.97		62.5804	0.357252	18.6486	2.59263	0.132694	0.500153	2.07206	5.21588	7.79831	0.102072	100
ITALIAN	19	M	Campi Flegrei	CI Y-5	Campanian Ignimbrite	59.1	0.39	18.02	2.56	0.2	0.32	1.58	6.02	6.89	0.02	95.1		62.1451	0.410095	18.9485	2.6919	0.210305	0.336488	1.66141	6.33018	7.24501	0.0210305	100
ITALIAN	19	M	Campi Flegrei	CI Y-5	Campanian Ignimbrite	59.66	0.5	18.1	2.63	0.23	0.34	1.74	5.92	7.15	0.07	96.34		61.9265	0.518995	18.7876	2.72991	0.238738	0.352917	1.8061	6.1449	7.42163	0.0726593	100
ITALIAN	19	M	Campi Flegrei	CI Y-5	Campanian Ignimbrite	60.55	0.4	18.61	2.59	0.23	0.35	1.61	6.46	7.11	0.05	97.96		61.8109	0.40833	18.9976	2.64394	0.23479	0.357289	1.64353	6.59453	7.25806	0.0510412	100
ITALIAN	19	M	Campi Flegrei	CI Y-5	Campanian Ignimbrite	58.8	0.34	17.75	3.2	0.09	0.74	2.58	2.98	9.47	0.14	96.09		61.1926	0.353835	18.4723	3.33021	0.0936622	0.770111	2.68498	3.10126	9.85534	0.145697	100
ITALIAN	19	M	Campi Flegrei	CI Y-5	Campanian Ignimbrite	59.12	0.38	17.97	2.5	0.19	0.35	1.68	5.9	7.06	0.06	95.21		62.0943	0.399118	18.8741	2.62577	0.199559	0.367608	1.76452	6.19683	7.41519	0.0630186	100
ITALIAN	19	M	Campi Flegrei	CI Y-5	Campanian Ignimbrite	61.57	0.32	18.16	2.4	0.11	0.45	1.89	5.06	7.22	0.12	97.3		63.2785	0.32888	18.6639	2.4666	0.113052	0.462487	1.94245	5.20041	7.42035	0.12333	100
ITALIAN	19	M	Campi Flegrei	CI Y-5	Campanian Ignimbrite	60.52	0.36	17.88	2.48	0.18	0.48	1.88	4.99	7.07	0.05	95.89		63.114	0.37543	18.6464	2.5863	0.187715	0.500574	1.96058	5.20388	7.37303	0.0521431	100
ITALIAN	19	M	Campi Flegrei	CI Y-5	Campanian Ignimbrite	61.27	0.32	18.05	2.67	0.06	0.55	2.15	4.45	8.17	0.09	97.78		62.6611	0.327265	18.4598	2.73062	0.0613622	0.562487	2.19881	4.55103	8.35549	0.0920434	100
ITALIAN	19	M	Campi Flegrei	CI Y-5	Campanian Ignimbrite	59.01	0.44	18.02	2.6	0.25	0.34	1.67	5.86	6.93	0.05	95.17		62.0048	0.462331	18.9345	2.73195	0.262688	0.357255	1.75475	6.1574	7.28171	0.0525376	100
ITALIAN	19	M	Campi Flegrei	CI Y-5	Campanian Ignimbrite	60.06	0.36	18.36	2.65	0.21	0.34	1.61	6.56	7.03	0.03	97.21		61.7838	0.370332	18.8869	2.72606	0.216027	0.349758	1.65621	6.74828	7.23177	0.030861	100
ITALIAN	19	M	Campi Flegrei	CI Y-5	Campanian Ignimbrite	60.73	0.4	18.29	2.56	0.22	0.35	1.66	6.5	6.89	0.02	97.62		62.2106	0.409752	18.7359	2.62241	0.225364	0.358533	1.70047	6.65847	7.05798	0.0204876	100
ITALIAN	19	M	Campi Flegrei	CI Y-5	Campanian Ignimbrite	59.1	0.43	17.9	2.41	0.2	0.33	1.52	5.96	6.87	0.04	94.76		62.3681	0.453778	18.8898	2.54327	0.21106	0.348248	1.60405	6.28957	7.24989	0.0422119	100
ITALIAN	19	M	Campi Flegrei	CI Y-5	Campanian Ignimbrite	60.13	0.44	18.28	2.61	0.18	0.33	1.73	6.31	7.14	0.03	97.18		61.8749	0.452768	18.8105	2.68574	0.185223	0.339576	1.7802	6.49311	7.34719	0.0308705	100
ITALIAN	19	M	Campi Flegrei	CI Y-5	Campanian Ignimbrite	59.68	0.45	18.12	2.59	0.22	0.33	1.66	5.96	7.56	0.01	96.58		61.7933	0.465935	18.7616	2.68171	0.22779	0.341686	1.71878	6.17105	7.82771	0.0103541	100
ITALIAN	19	M	Campi Flegrei	CI Y-5	Campanian Ignimbrite	59.19	0.42	17.95	2.43	0.25	0.37	1.59	6.35	6.74	0.01	95.3		62.1091	0.440714	18.8353	2.54984	0.262329	0.388248	1.66842	6.66317	7.0724	0.0104932	100
ITALIAN	19	M	Campi Flegrei	CI Y-5	Campanian Ignimbrite	59.76	0.4	17.83	2.41	0.13	0.39	1.6	4.92	7.99	0.03	95.46		62.6021	0.419024	18.678	2.52462	0.136183	0.408548	1.67609	5.15399	8.37	0.0314268	100
ITALIAN	19	M	Campi Flegrei	CI Y-5	Campanian Ignimbrite	59.99	0.42	17.93	2.31	0.16	0.41	1.65	5.17	7.61	0.06	95.71		62.6789	0.438826	18.7337	2.41354	0.167172	0.428377	1.72396	5.40173	7.9511	0.0626894	100
ITALIAN	19	M	Campi Flegrei	CI Y-5	Campanian Ignimbrite	59.17	0.4	18.16	2.59	0.21	0.34	1.63	5.8	7.53	0.03	95.86		61.7254	0.417275	18.9443	2.70186	0.219069	0.354684	1.7004	6.05049	7.85521	0.0312956	100
ITALIAN	19	M	Campi Flegrei	CI Y-5	Campanian Ignimbrite	60.92	0.39	18.45	3.18	0.1	0.79	2.59	4.5	7.98	0.13	99.03		61.5167	0.39382	18.6307	3.21115	0.10098	0.797738	2.61537	4.54408	8.05816	0.131273	100
ITALIAN	19	M	Campi Flegrei	CI Y-5	Campanian Ignimbrite	57.57	0.42	18.24	2.76	0.18	0.55	2.14	4.48	8.24	0.11	94.69		60.7984	0.443553	19.2629	2.91477	0.190094	0.580843	2.26001	4.73123	8.70208	0.116169	100
ITALIAN	19	M	Campi Flegrei	CI Y-5	Campanian Ignimbrite	61.28	0.44	18.74	2.63	0.17	0.37	1.64	6.19	7.76	0.05	99.27		61.7306	0.443236	18.8778	2.64934	0.17125	0.372721	1.65206	6.23552	7.81706	0.0503677	100
ITALIAN	19	M	Campi Flegrei	CI Y-5	Campanian Ignimbrite	60.56	0.4	18.51	2.58	0.24	0.35	1.61	6.47	7.04	0.05	97.81		61.916	0.408956	18.9244	2.63777	0.245374	0.357837	1.64605	6.61487	7.19763	0.0511195	100
ITALIAN	19	M	Campi Flegrei	CI Y-5	Campanian Ignimbrite	59.83	0.42	18.11	2.93	0.07	0.72	2.28	4.6	7.73	0.14	96.83		61.7887	0.43375	18.7029	3.02592	0.0722916	0.743571	2.35464	4.75059	7.98306	0.144583	100
ITALIAN	19	M	Campi Flegrei	CI Y-5	Campanian Ignimbrite	60.86	0.4	18.61	2.67	0.2	0.34	1.66	6.47	7.3	0.01	98.52		61.7743	0.406009	18.8896	2.71011	0.203004	0.345108	1.68494	6.56719	7.40966	0.0101502	100
ITALIAN	19	M	Campi Flegrei	CI Y-5	Campanian Ignimbrite	59.9	0.43	18.12	2.59	0.23	0.35	1.69	6.19	7.03	0.06	96.59		62.0147	0.445181	18.7597	2.68144	0.23812	0.362356	1.74966	6.40853	7.27819	0.0621182	100
ITALIAN	19	M	Campi Flegrei	CI Y-5	Campanian Ignimbrite	60.68	0.29	18.18	2.95	0.08	0.72	2.41	3.44	10.01	0.17	98.93		61.3363	0.293137	18.3766	2.98191	0.0808653	0.727787	2.43607	3.47721	10.1183	0.171839	100
ITALIAN	19	M	Campi Flegrei	CI Y-5	Campanian Ignimbrite	60.57	0.39	18.39	2.61	0.2	0.37	1.65	6.41	7.35	0.05	97.99		61.8124	0.398	18.7672	2.66354	0.204102	0.37759	1.68385	6.54148	7.50077	0.0510256	100
ITALIAN	19	M	Campi Flegrei	CI Y-5	Campanian Ignimbrite	60.01	0.36	17.74	2.37	0.1	0.52	1.91	4.99	7.28	0.07	95.35		62.9365	0.377556	18.6051	2.48558	0.104877	0.545359	2.00315	5.23335	7.63503	0.0734137	100
ITALIAN	20	M	Campi Flegrei	CI Y-5	Campanian Ignimbrite	61.2845	0.381214	18.2215	2.95331	0.29485	0.31273	1.67845	6.56534	7.17292	0.0638843	98.9287		61.9481	0.385343	18.4189	2.9853	0.298043	0.316116	1.69663	6.63643	7.25059	0.0645761	100
ITALIAN	20	M	Campi Flegrei	CI Y-5	Campanian Ignimbrite	62.6347	0.332736	18.0954	2.41104	0.0977391	0.288251	1.97623	4.912	8.30687	0.0661456	99.1211		63.1901	0.335686	18.2558	2.43242	0.0986058	0.290807	1.99376	4.95555	8.38053	0.0667321	100
ITALIAN	20	M	Campi Flegrei	CI Y-5	Campanian Ignimbrite	61.6713	0.350196	18.0999	2.97885	0.074164	0.588435	2.17331	4.38045	8.99955	0.124453	99.4406		62.0182	0.352166	18.2017	2.99561	0.0745812	0.591746	2.18554	4.40509	9.05017	0.125153	100
ITALIAN	20	M	Campi Flegrei	CI Y-5	Campanian Ignimbrite	61.7193	0.405865	17.9914	3.05447	0.121487	0.502405	2.19599	4.05771	9.32882	0.106917	99.4844		62.0392	0.407969	18.0847	3.0703	0.122117	0.505009	2.20737	4.07874	9.37717	0.107471	100
ITALIAN	20	M	Campi Flegrei	CI Y-5	Campanian Ignimbrite	61.6088	0.423528	18.3784	2.95917	0.225413	0.297072	1.69451	6.18722	7.13363	0.0568049	98.9646		62.2534	0.427959	18.5707	2.99013	0.227771	0.30018	1.71224	6.25195	7.20827	0.0573992	100
ITALIAN	20	M	Campi Flegrei	CI Y-5	Campanian Ignimbrite	61.0579	0.442503	18.5212	2.92656	0.189572	0.310155	1.7145	6.02116	7.75024	0.0715045	99.0053		61.6714	0.446949	18.7073	2.95596	0.191477	0.313271	1.73172	6.08166	7.82811	0.0722229	100
ITALIAN	20	M	Campi Flegrei	CI Y-5	Campanian Ignimbrite	61.6281	0.378915	18.3381	2.83279	0.196436	0.331171	1.77873	6.32225	7.11597	0.0706204	98.9931		62.2549	0.38277	18.5246	2.8616	0.198434	0.334539	1.79682	6.38656	7.18835	0.0713387	100
ITALIAN	20	M	Campi Flegrei	CI Y-5	Campanian Ignimbrite	62.251	0.396726	18.0579	2.82012	0.125231	0.442461	2.09376	4.86674	8.19901	0.0377526	99.2908		62.6957	0.39956	18.1869	2.84026	0.126125	0.445621	2.10872	4.90151	8.25757	0.0380223	100
ITALIAN	20	M	Campi Flegrei	CI Y-5	Campanian Ignimbrite	61.1683	0.305035	18.2504	3.16798	0.160115	0.743619	2.43232	3.23403	9.96247	0.112256	99.5365		61.4531	0.306455	18.3354	3.18273	0.16086	0.747082	2.44364	3.24909	10.0089	0.112779	100
ITALIAN	20	M	Campi Flegrei	CI Y-5	Campanian Ignimbrite	61.0145	0.391086	18.923	2.70271	0.124688	0.293846	1.75169	5.81448	7.75097	0.0509603	98.8179		61.7444	0.395764	19.1493	2.73504	0.126179	0.297361	1.77265	5.88403	7.84369	0.0515699	100
ITALIAN	20	M	Campi Flegrei	CI Y-5	Campanian Ignimbrite	61.9318	0.370824	18.3526	2.92334	0.171166	0.323645	1.78113	5.83604	7.3373	0.0591543	99.087		62.5024	0.374241	18.5217	2.95027	0.172743	0.326627	1.79755	5.88982	7.40491	0.0596994	100
ITALIAN	20	M	Campi Flegrei	CI Y-5	Campanian Ignimbrite	61.2579	0.48046	18.3959	3.01127	0.302016	0.223878	1.65758	6.18639	7.38611	0.0520187	98.9535		61.9057	0.485541	18.5904	3.04312	0.30521	0.226246	1.67511	6.25182	7.46423	0.0525689	100
ITALIAN	20	M	Campi Flegrei	CI Y-5	Campanian Ignimbrite	60.0797	0.545096	18.6952	3.61908	0.107136	0.703289	3.10537	3.10778	9.81842	0.127329	99.9085		60.1348	0.545595	18.7124	3.6224	0.107234	0.703933	3.10822	3.11063	9.82742	0.127445	100
ITALIAN	20	M	Campi Flegrei	CI Y-5	Campanian Ignimbrite	61.1895	0.394982	18.2743	2.96367	0.274575	0.337705	1.79388	6.48182	7.24565	0.0271752	98.9832		61.818	0.399039	18.462	2.99411	0.277395	0.341174	1.81231	6.5484	7.32008	0.0274544	100
ITALIAN	20	M	Campi Flegrei	CI Y-5	Campanian Ignimbrite	61.1412	0.444297	18.3951	3.04961	0.17466	0.306259	1.79449	6.49352	7.10584	0.0486956	98.9536		61.7877	0.448995	18.5896	3.08186	0.176507	0.309498	1.81347	6.56219	7.18098	0.0492105	100
ITALIAN	20	M	Campi Flegrei	CI Y-5	Campanian Ignimbrite	60.5753	0.429433	18.1538	3.50376	0.0641082	0.790975	2.64684	3.10695	10.0523	0.165741	99.4892		60.8863	0.431638	18.247	3.52175	0.0644374	0.795036	2.66043	3.1229	10.1039	0.166592	100
ITALIAN	20	M	Campi Flegrei	CI Y-5	Campanian Ignimbrite	61.3792	0.448365	18.1127	2.87255	0.221258	0.323574	1.7362	5.81089	7.92054	0.0645506	98.8898		62.0683	0.453399	18.316	2.9048	0.223742	0.327207	1.75569	5.87613	8.00946	0.0652753	100
ITALIAN	20	M	Campi Flegrei	CI Y-5	Campanian Ignimbrite	61.4269	0.395127	18.3954	2.73515	0.233026	0.304264	1.68124	6.36596	7.29163	0.0458991	98.8745		62.1261	0.399625	18.6048	2.76629	0.235679	0.307727	1.70037	6.43842	7.37463	0.0464216	100
ITALIAN	20	M	Campi Flegrei	CI Y-5	Campanian Ignimbrite	61.0049	0.358052	18.2436	3.46911	0.128234	0.69468	2.66637	3.05745	9.75352	0.143179	99.5191		61.2997	0.359782	18.3318	3.48587	0.128854	0.698036	2.67925	3.07222	9.80065	0.143871	100
ITALIAN	20	M	Campi Flegrei	CI Y-5	Campanian Ignimbrite	60.7415	0.411555	18.3466	3.11466	0.172896	0.332781	1.74918	6.69791	7.25298	0.0728784	98.8929		61.4215	0.416162	18.552	3.14953	0.174831	0.336507	1.76877	6.77289	7.33418	0.0736943	100
ITALIAN	20	M	Campi Flegrei	CI Y-5	Campanian Ignimbrite	61.582	0.385596	18.1561	3.11154	0.276999	0.33961	1.71305	5.4655	7.91142	0.0358393	98.9776		62.2181	0.38958	18.3436	3.14368	0.27986	0.343118	1.73075	5.52195	7.99314	0.0362095	100
ITALIAN	20	M	Campi Flegrei	CI Y-5	Campanian Ignimbrite	61.2902	0.318317	18.1499	3.23903	0.159055	0.620957	2.40077	3.57749	9.60683	0.141197	99.5037		61.5959	0.319905	18.2404	3.25518	0.159848	0.624054	2.41275	3.59533	9.65474	0.141902	100
ITALIAN	20	M	Campi Flegrei	CI Y-5	Campanian Ignimbrite	61.184	0.442635	18.4324	2.99281	0.142972	0.311526	1.6777	6.54194	7.23452	0.00546718	98.966		61.8232	0.44726	18.625	3.02408	0.144466	0.314781	1.69523	6.61029	7.3101	0.0055243	100
ITALIAN	20	M	Campi Flegrei	CI Y-5	Campanian Ignimbrite	61.1792	0.456103	18.2612	3.07026	0.207783	0.32929	1.74907	6.29322	7.22496	0.0533783	98.8245		61.907	0.461528	18.4784	3.10678	0.210254	0.333207	1.76987	6.36808	7.31089	0.0540132	100
ITALIAN	20	M	Campi Flegrei	CI Y-5	Campanian Ignimbrite	61.4205	0.400089	18.375	3.0048	0.283431	0.307093	1.81611	6.14228	7.15263	0.0329619	98.9349		62.0818	0.404397	18.5728	3.03715	0.286482	0.310399	1.83566	6.20841	7.22963	0.0333168	100
ITALIAN	20	M	Campi Flegrei	CI Y-5	Campanian Ignimbrite	61.7847	0.35185	18.2085	3.0381	0.0747364	0.505385	2.3086	4.48703	8.55499	0.124595	99.4385		62.1336	0.353837	18.3113	3.05525	0.0751585	0.508239	2.32164	4.51237	8.6033	0.125298	100
ITALIAN	20	M	Campi Flegrei	CI Y-5	Campanian Ignimbrite	61.2261	0.406727	18.4499	2.8858	0.152535	0.319349	1.71499	6.54655	7.12381	0.0518841	98.8777		61.921	0.411344	18.6594	2.91856	0.154267	0.322974	1.73446	6.62086	7.20467	0.052473	100
ITALIAN	20	M	Campi Flegrei	CI Y-5	Campanian Ignimbrite	62.5443	0.382039	18.3012	2.57614	0.196057	0.437561	1.89739	5.47544	7.51756	0.0204664	99.3482		62.9546	0.384545	18.4213	2.59304	0.197344	0.440431	1.90984	5.51136	7.56688	0.0206007	100
ITALIAN	20	M	Campi Flegrei	CI Y-5	Campanian Ignimbrite	61.5961	0.41331	18.2078	3.14463	0.291181	0.317556	1.72071	5.74503	7.45304	0.0655661	98.955		62.2466	0.417675	18.4001	3.17784	0.294256	0.32091	1.73889	5.80571	7.53175	0.0662586	100
ITALIAN	20	M	Campi Flegrei	CI Y-5	Campanian Ignimbrite	61.0445	0.451985	18.4518	2.85894	0.202292	0.342817	1.84706	6.07212	7.64379	0.0711012	98.9864		61.6696	0.456613	18.6407	2.88821	0.204364	0.346327	1.86597	6.1343	7.72206	0.0718292	100
ITALIAN	20	M	Campi Flegrei	CI Y-5	Campanian Ignimbrite	61.6349	0.435712	18.416	2.85759	0.186661	0.330908	1.72656	6.24596	6.99322	0.0684354	98.8959		62.323	0.440577	18.6216	2.88949	0.188745	0.334602	1.74584	6.31569	7.07129	0.0691994	100
ITALIAN	20	M	Campi Flegrei	CI Y-5	Campanian Ignimbrite	61.5166	0.45626	18.5182	2.90969	0.198178	0.329886	1.83017	5.78829	7.3455	0.059597	98.9524		62.1679	0.461091	18.7143	2.94049	0.200276	0.333379	1.84955	5.84957	7.42327	0.0602279	100
ITALIAN	20	M	Campi Flegrei	CI Y-5	Campanian Ignimbrite	61.5542	0.41135	18.3588	2.7987	0.246974	0.317801	1.79002	6.05521	7.33348	0.0147386	98.8813		62.2506	0.416004	18.5665	2.83036	0.249768	0.321397	1.81028	6.12372	7.41645	0.0149054	100
ITALIAN	20	M	Campi Flegrei	CI Y-5	Campanian Ignimbrite	61.0941	0.431573	18.391	2.96064	0.152526	0.347054	1.85271	6.24222	7.36811	0.0399375	98.8798		61.7862	0.436462	18.5993	2.99418	0.154254	0.350986	1.8737	6.31294	7.45158	0.04039	100
ITALIAN	20	M	Campi Flegrei	CI Y-5	Campanian Ignimbrite	60.1905	0.44068	19.2725	0.194424	0.326276	2.85616	1.77521	6.45005	7.36352	0.0305626	98.8998		60.86	0.445582	19.4869	0.196586	0.329906	2.88793	1.79496	6.5218	7.44543	0.0309026	100
ITALIAN	20	M	Campi Flegrei	CI Y-5	Campanian Ignimbrite	60.1791	0.374707	18.9231	0.304679	0.367368	3.04546	1.78669	6.2899	7.49108	0.0816486	98.8438		60.8831	0.37909	19.1445	0.308243	0.371665	3.08109	1.80759	6.36348	7.57871	0.0826037	100
ITALIAN	20	M	Campi Flegrei	CI Y-5	Campanian Ignimbrite	60.1201	0.388309	18.7793	0.118392	0.777341	3.21929	2.60019	3.19597	10.1893	0.172788	99.561		60.3852	0.390022	18.8621	0.118914	0.780769	3.23349	2.61165	3.21006	10.2342	0.17355	100
ITALIAN	20	M	Campi Flegrei	CI Y-5	Campanian Ignimbrite	60.2328	0.38732	19.0342	0.248955	0.350903	3.00351	1.67191	6.57457	7.3202	0.0372403	98.8616		60.9263	0.39178	19.2534	0.251822	0.354944	3.03809	1.69116	6.65027	7.40449	0.0376692	100
ITALIAN	20	M	Campi Flegrei	CI Y-5	Campanian Ignimbrite	61.6975	0.346462	18.7956	0.15923	0.254189	2.74917	2.09613	4.83693	8.18417	0.062204	99.1816		62.2066	0.349321	18.9507	0.160544	0.256287	2.77185	2.11343	4.87684	8.2517	0.0627173	100
ITALIAN	20	M	Campi Flegrei	CI Y-5	Campanian Ignimbrite	60.4713	0.417412	19.3823	0.242865	0.344446	2.77901	1.83311	6.0012	7.37952	0.066524	98.9178		61.1329	0.421978	19.5944	0.245522	0.348215	2.80942	1.85316	6.06686	7.46025	0.0672518	100
ITALIAN	20	M	Campi Flegrei	CI Y-5	Campanian Ignimbrite	60.3453	0.390084	18.6802	0.178091	0.304501	2.98155	1.84076	6.61934	7.49739	0.0604662	98.8978		61.0179	0.394432	18.8884	0.180076	0.307895	3.01478	1.86127	6.69312	7.58095	0.0611401	100
ITALIAN	20	M	Campi Flegrei	CI Y-5	Campanian Ignimbrite	60.6113	0.446457	18.4323	0.252569	0.329298	2.79701	1.70376	6.86504	7.40022	0.0351883	98.8732		61.3021	0.451546	18.6424	0.255448	0.333051	2.82889	1.72317	6.94328	7.48456	0.0355893	100
ITALIAN	20	M	Campi Flegrei	CI Y-5	Campanian Ignimbrite	60.7936	0.410679	18.53	0.0498044	0.737209	3.30753	2.5117	3.57782	9.49459	0.128765	99.5417		61.0735	0.41257	18.6154	0.0500337	0.740603	3.32276	2.52326	3.5943	9.5383	0.129358	100
ITALIAN	20	M	Campi Flegrei	CI Y-5	Campanian Ignimbrite	60.4362	0.363747	18.2729	0.167141	0.735655	3.38564	2.75852	3.05051	10.1481	0.191942	99.5103		60.7335	0.365537	18.3628	0.167964	0.739275	3.4023	2.77209	3.06553	10.1981	0.192887	100
ITALIAN	20	M	Campi Flegrei	CI Y-5	Campanian Ignimbrite	60.5513	0.445502	18.2698	0.289358	0.362713	3.00539	1.83406	6.38415	7.76844	0.0829927	98.9936		61.1668	0.450031	18.4555	0.2923	0.3664	3.03594	1.8527	6.44905	7.84741	0.0838364	100
ITALIAN	20	M	Campi Flegrei	CI Y-5	Campanian Ignimbrite	61.5113	0.374492	18.3759	0.097756	0.443291	2.86491	1.95861	4.98227	8.71774	0.0421008	99.3684		61.9023	0.376872	18.4927	0.0983774	0.446108	2.88312	1.97106	5.01394	8.77316	0.0423684	100
ITALIAN	20	M	Campi Flegrei	CI Y-5	Campanian Ignimbrite	61.5893	0.311339	18.4159	0.141031	0.55678	3.03007	2.29102	4.94921	8.08989	0.110495	99.4851		61.9081	0.312951	18.5112	0.141761	0.559662	3.04576	2.30288	4.97483	8.13176	0.111067	100
ITALIAN	20	M	Campi Flegrei	CI Y-5	Campanian Ignimbrite	60.3351	0.359521	18.5322	0.0636587	0.739811	3.36373	2.53627	3.20485	10.2486	0.153279	99.537		60.6158	0.361193	18.6183	0.0639548	0.743252	3.37938	2.54807	3.21975	10.2963	0.153992	100
ITALIAN	20	M	Campi Flegrei	CI Y-5	Campanian Ignimbrite	60.5404	0.453567	18.5919	0.249327	0.277455	3.10568	1.87838	5.88479	7.87082	0.0397104	98.892		61.2187	0.458648	18.8002	0.252121	0.280564	3.14048	1.89943	5.95072	7.959	0.0401553	100
ITALIAN	20	M	Campi Flegrei	CI Y-5	Campanian Ignimbrite	60.7333	0.436185	18.6693	0.236881	0.277893	2.86308	1.6717	6.43892	7.52454	0.058791	98.9105		61.4022	0.440989	18.8749	0.23949	0.280954	2.89462	1.69012	6.50985	7.60742	0.0594385	100
ITALIAN	20	M	Campi Flegrei	CI Y-5	Campanian Ignimbrite	60.0139	0.450944	18.627	0.229117	0.310821	2.9609	1.66497	7.15294	7.43085	0.0304747	98.8719		60.6986	0.456089	18.8395	0.231731	0.314368	2.99468	1.68397	7.23455	7.51564	0.0308224	100
ITALIAN	20	M	Campi Flegrei	CI Y-5	Campanian Ignimbrite	60.4933	0.479856	18.3238	0.25737	0.333323	2.86696	1.78952	7.01926	7.25756	0.0600327	98.881		61.1779	0.485286	18.5311	0.260282	0.337095	2.89941	1.80977	7.09869	7.3397	0.060712	100
ITALIAN	20	M	Campi Flegrei	CI Y-5	Campanian Ignimbrite	60.2207	0.430252	18.3857	0.262155	0.326698	2.88442	1.79229	6.75372	7.92489	0.0503476	99.0311		60.8099	0.434462	18.5655	0.264719	0.329894	2.91264	1.80983	6.8198	8.00243	0.0508402	100
ITALIAN	20	M	Campi Flegrei	CI Y-5	Campanian Ignimbrite	60.4109	0.390568	18.2199	0.149529	0.746202	3.42731	2.71316	3.12599	10.1694	0.165193	99.5181		60.7034	0.392459	18.3081	0.150253	0.749815	3.44391	2.7263	3.14112	10.2186	0.165993	100
ITALIAN	20	M	Campi Flegrei	CI Y-5	Campanian Ignimbrite	60.6129	0.413048	18.4501	0.251955	0.335195	2.94734	1.74621	6.71122	7.33842	0.0369955	98.8434		61.3222	0.417882	18.666	0.254904	0.339118	2.98183	1.76664	6.78976	7.42429	0.0374284	100
ITALIAN	20	M	Campi Flegrei	CI Y-5	Campanian Ignimbrite	60.9908	0.413401	18.6368	0.248396	0.301235	3.00367	1.72151	6.47295	7.17796	0	98.9668		61.6276	0.417717	18.8314	0.25099	0.30438	3.03503	1.73948	6.54053	7.2529	0	100
ITALIAN	20	M	Campi Flegrei	CI Y-5	Campanian Ignimbrite	61.0194	0.403844	18.6795	0.161973	0.537215	3.08598	2.15394	4.58291	8.63203	0.0553382	99.3122		61.442	0.406641	18.8089	0.163095	0.540936	3.10736	2.16886	4.61465	8.69181	0.0557214	100
ITALIAN	20	M	Campi Flegrei	CI Y-5	Campanian Ignimbrite	60.9148	0.406045	18.6176	0.224245	0.308927	2.98188	1.71616	6.45376	7.26924	0	98.8927		61.5968	0.410592	18.8261	0.226755	0.312386	3.01527	1.73538	6.52603	7.35064	0	100
[truncated: 16 more columns]

## Sheet: References
	References
1	1 Keller J, Ryan WBF, Ninkovich D, Altherr R (1978) Explosive volcanic activity in the Mediterranean over the Past 200,000 yr as recorded in deep-sea sediments. Geol. Soc. Am. Bull. 89(4):591-604. https://doi.org/10.1130/0016-7606(1978)89<591:EVAITM>2.0.CO;2
2	2 Federman AN, Carey SN (1980) Electron microprobe correlation of tephra layers from Eastern Mediterranean abyssal sediments and the island of Santorini. Quat. Res. 13(2):160-171. https://doi.org/10.1016/0033-5894(80)90026-5
3	3 Vinci A (1985) Distribution and chemical composition of tephra layers from eastern Mediterranean abyssal sediments. Mar. Geol. 64(1-2):143-155. https://doi.org/10.1016/0025-3227(85)90165-3
4	4 Druitt TH, Mellors RA, Pyle DM, Sparks RSJ (1989) Explosive volcanism on Santorini, Greece. Geol. Mag. 126(2):95-126. https://doi.org/10.1017/S0016756800006270
5	5 Druitt TH, Francaviglia V (1992) Caldera formation on Santorini and the physiography of the islands in the Late Bronze Age. Bull. Volcanol. 54(6):484-493. https://doi.org/10.1007/BF00301394
6	6 Druitt TH, Edwards L, Mellors RM, Pyle DM, Sparks RSJ, Lanphere M et al (1999). Santorini Volcano. Geol. Soc. Lond. Mem. 19
7	7 Eastwood WJ, Pearce NJG, Westgate JA, Perkins WT, Lamb HF, Roberts N (1999) Geochemistry of Santorini Tephra in lake sediments from Southwest Turkey. Glob. Planet. Change. 21(1-3):17-29. https://doi.org/10.1016/S0921-8181(99)00005-3
8	8 Seymour K, Christanis K, Bouzinos A, Papazisimou S, Papatheodorou G, Moran E, Dénès G (2004) Tephrostratigraphy and tephrochronology in the Philippi peat basin, Macedonia, Northern Hellas (Greece). Quat. Int. 121(1):53-65. https://doi.org/10.1016/j.quaint.2004.01.023
9	9 Aksu AE, Jenner G, Hiscott RN, İşler EB (2008) Occurrence, Stratigraphy and geochemistry of late Quaternary tephra layers in the Aegean Sea and the Marmara Sea. Mar. Geol. 252(3-4):174-192. https://doi.org/10.1016/j.margeo.2008.04.004
10	10 Kwiecien O, Arz HW, Lamy F, Wulf S, Bahr A, Röhl U, Haug GH (2008) Estimated reservoir ages of the Black Sea since the last glacial. Radiocarbon 50(1):99-118. https://doi.org/10.1017/S0033822200043393
11	11 Tomlinson E, Kinvig HS, Smith V, Blundy JD, Gottsmann J, Müller W, Menzies MA (2012) The Upper and Lower Nisyros Pumices: Revisions to the Mediterranean tephrostratigraphic record based on micron-beam glass geochemistry. J. Volcanol. Geotherm. 243:69-80. https://doi.org/10.1016/j.jvolgeores.2012.07.004
12	12 Sulpizio R, Alçiçek MC, Zanchetta G, Solari L (2013) Recognition of the Minoan Tephra in the Acigöl Basin, Western Turkey: Implications for inter‐archive correlations and fine ash dispersal. J. Quat. Sci. 28(4):329-335. https://doi.org/10.1002/jqs.2630
13	13 Keller J, Gertisser R, Reusser E, Dietrich V (2014) Pumice deposits of the Santorini Lower Pumice 2 eruption on Anafi Island, Greece: Indications for a Plinian event of exceptional magnitude. J. Volcanol. Geotherm. 278:120-128. https://doi.org/10.1016/j.jvolgeores.2014.04.009
14	14 Satow C, Tomlinson EL, Grant KM, Albert PG, Smith VC, Manning CJ et al (2015). A new contribution to the Late Quaternary tephrostratigraphy of the Mediterranean: Aegean Sea core LC21. Quat. Sci. Rev. 117:96-112. https://doi.org/10.1016/j.quascirev.2015.04.005
15	15 Tomlinson EL, Smith VC, Albert PG, Aydar E, Civetta L, Cioni R et al (2015). The major and trace element glass compositions of the productive Mediterranean volcanic sources: tools for correlating distal tephra layers in and around Europe. Quat. Sci. Rev. 118:48-66. https://doi.org/10.1016/j.quascirev.2014.10.028
16	16 Klaver M, Davies GR, Vroon PZ (2016) Subslab mantle of African provenance infiltrating the Aegean mantle wedge. Geology 44(5):367-370. https://doi.org/10.1130/G37627.1
17	17 Kutterolf S, Freundt A, Hansteen TH, Dettbarn R, Hampel F, Sievers C et al (2021a). The medial off-shore record of explosive volcanism along the central to eastern Aegean Volcanic Arc: 1. Tephrostratigraphic correlations. Geochem. geophys. geosyst. 22(12):e2021gc010011. https://doi.org/10.1029/2021GC010010
18	18 Wulf S, Keller J, Satow C, Gertisser R, Kraml M, Grant KM et al (2020). Advancing Santorini’s tephrostratigraphy: New glass geochemical data and improved marine-terrestrial tephra correlations for the past ∼360 kyrs. Earth-Sci. Rev. 200:102964. https://doi.org/10.1016/j.earscirev.2019.102964
19	19 Wulf S, Çağatay MN, Appelt O, Eriş KK, Henry P (2021) Defining the Upper Nisyros Pumice (57.1±1.5 ka) as new tephra isochrone for linking early MIS-3 palaeoenvironmental records in the Aegean-Black Sea gateway: New evidence from the Sea of Marmara. Quat. Sci. Rev. 274:107285. https://doi.org/10.1016/j.quascirev.2021.107285
20	20 McGuire AM, Lane CS, Roucoux KH, Albert PG, Kearney R (2022) The dating and correlation of an Eastern Mediterranean Lake sediment sequence: a 46–4 ka tephrostratigraphy for Ioannina (NW Greece). J. Quat. Sci. 37(8):1313-1331. https://doi.org/10.1002/jqs.3452
