# Supplementary material for: Four-Stage Dynamics of the Minoan Ash Cloud and Revised VolumetricParameters: The Critical Bayır Tephra from the Yatağan Basin, Türkiye
Source: Research Square preprint supplement (doi:10.21203/rs.3.rs-8581124/v1), 2026-01-28
Supplement: Supplementary file 3 [file a2701a005b131973fa6dfdc0.xlsx]

## Sheet: supplementary table 3
Latitude	Longitude	location	eruption	thickness (cm)	Reference	Deposition Type
35.9667	27.0667	V10-50	Minoan	212	Ninkovich and Heezen 1965	sea core
35	27.8167	V10-52	Minoan	3	Ninkovich and Heezen 1965	sea core
35.7448	26.23	V10-58	Minoan	78	Ninkovich and Heezen 1965	sea core
33.9833	31.0333	Alb-187	Minoan	1.5	Ninkovich and Heezen 1965	sea core
33.9167	30.2833	Alb-188	Minoan	4.5	Ninkovich and Heezen 1965	sea core
33.9	28.4833	Alb-189	Minoan	2	Ninkovich and Heezen 1965	sea core
34.6	25.9833	Alb-192	Minoan	4	Ninkovich and Heezen 1965	sea core
36.4725	25.4223	Santorini	Minoan	110	Bond and Sparks 1976	terrestrial
36.4599	25.4298	Santorini	Minoan	170	Bond and Sparks 1976	terrestrial
36.4569	25.4225	Santorini	Minoan	150	Bond and Sparks 1976	terrestrial
36.4612	25.41	Santorini	Minoan	112	Bond and Sparks 1976	terrestrial
36.4571	25.4159	Santorini	Minoan	109	Bond and Sparks 1976	terrestrial
36.4617	25.3966	Santorini	Minoan	130	Bond and Sparks 1976	terrestrial
36.472	25.3707	Santorini	Minoan	50	Bond and Sparks 1976	terrestrial
36.4634	25.3698	Santorini	Minoan	65	Bond and Sparks 1976	terrestrial
36.4496	25.3533	Santorini	Minoan	30	Bond and Sparks 1976	terrestrial
36.4496	25.3472	Santorini	Minoan	27	Bond and Sparks 1976	terrestrial
36.4455	25.3539	Santorini	Minoan	42	Bond and Sparks 1976	terrestrial
36.4426	25.3576	Santorini	Minoan	32	Bond and Sparks 1976	terrestrial
36.4366	25.3468	Santorini	Minoan	28	Bond and Sparks 1976	terrestrial
36.4287	25.3474	Santorini	Minoan	20	Bond and Sparks 1976	terrestrial
36.4232	25.3494	Santorini	Minoan	19	Bond and Sparks 1976	terrestrial
36.4173	25.3372	Santorini	Minoan	17	Bond and Sparks 1976	terrestrial
36.4181	25.3426	Santorini	Minoan	18	Bond and Sparks 1976	terrestrial
36.412	25.3471	Santorini	Minoan	26	Bond and Sparks 1976	terrestrial
36.3639	25.3721	Santorini	Minoan	40	Bond and Sparks 1976	terrestrial
36.358	25.3606	Santorini	Minoan	25	Bond and Sparks 1976	terrestrial
36.3664	25.3813	Santorini	Minoan	44	Bond and Sparks 1976	terrestrial
36.3642	25.3901	Santorini	Minoan	53	Bond and Sparks 1976	terrestrial
36.3604	25.4035	Santorini	Minoan	135	Bond and Sparks 1976	terrestrial
36.3495	25.4042	Santorini	Minoan	90	Bond and Sparks 1976	terrestrial
36.3467	25.4234	Santorini	Minoan	170	Bond and Sparks 1976	terrestrial
36.3419	25.4307	Santorini	Minoan	116	Bond and Sparks 1976	terrestrial
36.3366	25.4374	Santorini	Minoan	105	Bond and Sparks 1976	terrestrial
36.3442	25.4479	Santorini	Minoan	185	Bond and Sparks 1976	terrestrial
36.3499	25.4463	Santorini	Minoan	220	Bond and Sparks 1976	terrestrial
36.3538	25.4455	Santorini	Minoan	230	Bond and Sparks 1976	terrestrial
36.3635	25.4465	Santorini	Minoan	200	Bond and Sparks 1976	terrestrial
36.3661	25.418	Santorini	Minoan	230	Bond and Sparks 1976	terrestrial
36.3697	25.4204	Santorini	Minoan	280	Bond and Sparks 1976	terrestrial
36.3743	25.4229	Santorini	Minoan	350	Bond and Sparks 1976	terrestrial
36.3777	25.424	Santorini	Minoan	360	Bond and Sparks 1976	terrestrial
36.3856	25.4303	Santorini	Minoan	420	Bond and Sparks 1976	terrestrial
36.3735	25.4541	Santorini	Minoan	450	Bond and Sparks 1976	terrestrial
36.3745	25.4626	Santorini	Minoan	350	Bond and Sparks 1976	terrestrial
36.3658	25.4685	Santorini	Minoan	400	Bond and Sparks 1976	terrestrial
36.3886	25.4461	Santorini	Minoan	330	Bond and Sparks 1976	terrestrial
36.4076	25.4285	Santorini	Minoan	550	Bond and Sparks 1976	terrestrial
36.413	25.429	Santorini	Minoan	500	Bond and Sparks 1976	terrestrial
36.4209	25.4296	Santorini	Minoan	430	Bond and Sparks 1976	terrestrial
36.4263	25.4257	Santorini	Minoan	385	Bond and Sparks 1976	terrestrial
36.4312	25.4208	Santorini	Minoan	241	Bond and Sparks 1976	terrestrial
36.4364	25.4184	Santorini	Minoan	290	Bond and Sparks 1976	terrestrial
36.4448	25.4244	Santorini	Minoan	200	Bond and Sparks 1976	terrestrial
36.4481	25.4334	Santorini	Minoan	145	Bond and Sparks 1976	terrestrial
35.3217	29.02	TR172-22	Minoan	5	Watkins et al. 1978	sea core
34.22	29.5633	TR172-18	Minoan	1.2	Watkins et al. 1978	sea core
34.7867	28.8233	TR172-23	Minoan	2.2	Watkins et al. 1978	sea core
34.8833	28.4617	TR172-24	Minoan	3.1	Watkins et al. 1978	sea core
36.0667	27.3167	TR172-25	Minoan	26	Watkins et al. 1978	sea core
36.0133	26.7417	TR172-26	Minoan	12	Watkins et al. 1978	sea core
35.92	26.055	TR172-27	Minoan	1.2	Watkins et al. 1978	sea core
34.8485	26.3933	TR171-28	Minoan	0.9	Watkins et al. 1978	sea core
36	25.3767	TR171-29	Minoan	1	Watkins et al. 1978	sea core
35.8493	25.3497	TR171-30	Minoan	1.1	Watkins et al. 1978	sea core
35.6583	25.2967	TR171-31	Minoan	1	Watkins et al. 1978	sea core
35.805	25.6117	TR172-2	Minoan	45	Watkins et al. 1978	sea core
35.885	25.1733	TR172-3	Minoan	210	Watkins et al. 1978	sea core
35.6933	26.965	TR172-9	Minoan	25	Watkins et al. 1978	sea core
35.6907	25.5118	TR172-1	Minoan	122	Federman and Carey 1980	sea core
34.14	28.9783	TR172-11	Minoan	6	Federman and Carey 1980	sea core
34.7083	30.15	TR172-19	Minoan	6	Federman and Carey 1980	sea core
35.205	29.7583	TR172-21	Minoan	4	Federman and Carey 1980	sea core
35.0867	27.5567	TR172-10	Minoan	1.1	Sparks et al. 1983	sea core
33.9033	29.26	TR172-12	Minoan	not visible	Sparks et al. 1983	sea core
33.605	28.8667	TR172-13	Minoan	0.3	Sparks et al. 1983	sea core
32.63	26.83	TR172-15	Minoan	not visible	Sparks et al. 1983	sea core
33.3333	28.3417	TR172-17	Minoan	0.5	Sparks et al. 1983	sea core
35.2117	30.555	TR172-20	Minoan	not visible	Sparks et al. 1983	sea core
35.4128	26.011	MC10	Minoan	2	Vinci 1985	sea core
35.724	25.7393	MC12	Minoan	12	Vinci 1985	sea core
35.8589	25.1888	MC13	Minoan	42	Vinci 1985	sea core
35.6419	25.0988	MC14	Minoan	4	Vinci 1985	sea core
35.7164	24.6126	MC16	Minoan	6	Vinci 1985	sea core
35.7999	24.0466	MC22	Minoan	3	Vinci 1985	sea core
35.5982	26.8043	MC27	Minoan	3	Vinci 1985	sea core
36.0474	27.5183	MC3	Minoan	9	Vinci 1985	sea core
35.58	27.4078	MC35	Minoan	14	Vinci 1985	sea core
36.033	27.0493	MC6	Minoan	35	Vinci 1985	sea core
36.0196	26.7166	MC7	Minoan	4	Vinci 1985	sea core
35.6434	26.2267	MC9	Minoan	25	Vinci 1985	sea core
36.9168	28.6485	Köyceğiz	Minoan	9	Sullivan 1990	lake sediments
31.3011	32.0107	Lake Manzala	Minoan	dispersed	Stanley & Sheng 1986	lake sediments
38.238	28.6082	Gölcük	Minoan	12	Sullivan 1988	lake sediments
36.8757	27.2583	Kos	Minoan	60	Marketou 1990	archeological
36.398	28.0739	Rhodes	Minoan	225	Marketou 1990	terrestrial
36.2577	28.1427	Kolymbia	Minoan	90	Marketou 1990	terrestrial
42.3232	34.0157	GGC79	Minoan	0.15	Guichard et al. 1993	sea core
42.2003	34.1055	GGC71	Minoan	0.19	Guichard et al. 1993	sea core
42.9833	34.0062	GGC24	Minoan	0.12	Guichard et al. 1993	sea core
41° 58.540'	36° 33.300'	GGC59	Minoan	n.m.	Guichard et al. 1993	sea core
37.1233	29.5926	Gölhisar	Minoan	4	Eastwood 1999	lake sediments
37.2796	27.5849	Iasos	Minoan	20	Momigliano 2012	archeological
37.3584	27.2795	Didim	Minoan	17	Minoura 2000	terrestrial
36.5669	29.0587	Fethiye	Minoan	7	Minoura 2000	terrestrial
35.3301	24.2717	Kournas	Minoan	12	Bottema & Sarpaki 2003	lake sediments
41.535	31.1667	GeoB 7622-2	Minoan	0.5	Lamy et al. 2006; Kwiecien et al. 2008	sea core
41.5	31.085	GeoB 7624-1	Minoan	0.5	Kwiecien et al. 2008	sea core
41.445	31.0667	GeoB 7625-2	Minoan	0.5	Lamy et al. 2006; Kwiecien et al. 2008	sea core
41.5278	30.8848	MD04-2788	Minoan	0.1	Kwiecien et al. 2008	sea core
41.5278	30.8833	MD04-2760	Minoan	0.1	Kwiecien et al. 2008	sea core
39.017	25.0247	MAR03-28	Minoan	disseminated	Aksu et al. 2008	sea core
38.3113	25.3162	MAR03-27	Minoan	disseminated	Aksu et al. 2008	sea core
37.862	25.8195	MAR03-3	Minoan	disseminated	Aksu et al. 2008	sea core
36.8968	27.5587	MAR03-24	Minoan	5	Aksu et al. 2008	sea core
37.1727	26.4425	MAR03-25	Minoan	3	Aksu et al. 2008	sea core
37.8561	29.8006	Acıgöl	Minoan	15	Sulpizio et al. 2013	terrestrial
38.4642	27.1695	Bayraklı	Minoan	reworked 10	Kayan 1999; Kayan & Öner 2013	reworked archeological
42.1035	36.6238	M72/5-25-GC1	Minoan	0.1	Cullen et al. 2014	sea core
35.6667	26.5833	LC21	Minoan	22.4	Satow et al 2015	sea core
36.4538	29.281	Eşen Plain	Minoan	10	Vardar and Öner 2016	core data
39.2258	26.7807	Madra	Minoan	4	Vardar & Öner 2017	lake sediments
38.0497	27.6304	Karagöl Tire	Minoan	8	Vardar & Öner 2017	lake sediments
38.0239	27.4688	Belevi Lake	Minoan	7	Vardar & Öner 2017	lake sediments
38.6335	28.0104	Marmara Lake	Minoan	8	Vardar 2018 a	lake sediments
38.776	27.0175	Güzelhisar	Minoan	4	Vardar 2018 b	core data
35.1199	26.278	Pelekatia	Minoan	9	Bruins et al. 2019	terrestrial
38.1796	26.7833	Teos	Minoan	10	Vardar et al. 2020	archeological
36.34	29.2933	Letoon	Minoan	4	Aydar et al. 2021	core data
36.5876	25.2654	POS513-2	Minoan	>52	Kutterolf 2021	sea core
36.5876	25.2653	POS513-2-1	Minoan	5	Kutterolf 2021	sea core
36.5403	25.0898	POS513-3	Minoan	>5	Kutterolf 2021	sea core
36.5038	24.9309	POS513-4	Minoan	>5	Kutterolf 2021	sea core
36.5724	24.5019	POS513-7-1	Minoan	3	Kutterolf 2021	sea core
36.4724	24.235	POS513-8-2	Minoan	1	Kutterolf 2021	sea core
36.2666	25.0858	POS513-9	Minoan	4	Kutterolf 2021	sea core
36.3594	25.622	POS513-11	Minoan	>5	Kutterolf 2021	sea core
36.6779	25.8467	POS513-14	Minoan	12	Kutterolf 2021	sea core
36.709	25.7182	POS513-15	Minoan	3	Kutterolf 2021	sea core
36.6209	25.4503	POS513-17	Minoan	>4	Kutterolf 2021	sea core
36.4419	25.5736	POS513-19	Minoan	52	Kutterolf 2021	sea core
36.5558	25.6642	POS513-20	Minoan	41	Kutterolf 2021	sea core
36.3451	25.6381	POS513-25	Minoan	57	Kutterolf 2021	sea core
36.4799	25.7731	POS513-26	Minoan	>38	Kutterolf 2021	sea core
36.2545	26.0056	POS513-27	Minoan	17	Kutterolf 2021	sea core
36.5316	26.0175	POS513-28	Minoan	7	Kutterolf 2021	sea core
36.3945	25.964	POS513-30	Minoan	23	Kutterolf 2021	sea core
36.6366	26.175	POS513-31	Minoan	4	Kutterolf 2021	sea core
36.8392	26.2566	POS513-32	Minoan	9	Kutterolf 2021	sea core
36.7019	26.4843	POS513-34	Minoan	13	Kutterolf 2021	sea core
36.5554	26.5856	POS513-35	Minoan	6	Kutterolf 2021	sea core
36.4412	26.455	POS513-36	Minoan	11	Kutterolf 2021	sea core
36.4194	26.2655	POS513-37	Minoan	12	Kutterolf 2021	sea core
35.8584	26.3295	POS513-40	Minoan	4	Kutterolf 2021	sea core
35.9954	26.7889	POS513-41	Minoan	29	Kutterolf 2021	sea core
36.4651	26.7282	POS513-43	Minoan	28	Kutterolf 2021	sea core
36.5264	26.8877	POS513-44	Minoan	32	Kutterolf 2021	sea core
36.4472	27.0183	POS513-45	Minoan	11	Kutterolf 2021	sea core
36.3849	26.8272	POS513-46	Minoan	6	Kutterolf 2021	sea core
36.7551	27.1918	POS513-48	Minoan	12	Kutterolf 2021	sea core
36.6786	27.2254	POS513-49	Minoan	4	Kutterolf 2021	sea core
36.6677	27.037	POS513-50	Minoan	1.5	Kutterolf 2021	sea core
36.6152	27.2674	POS513-51	Minoan	6	Kutterolf 2021	sea core
36.546	27.3042	POS513-52	Minoan	5	Kutterolf 2021	sea core
36.477	27.0625	POS513-53	Minoan	16	Kutterolf 2021	sea core
36.5033	24.9307	POS513-55	Minoan	43	Kutterolf 2021	sea core
36.7646	25.0361	POS513-56	Minoan	5	Kutterolf 2021	sea core
36.3354	25.184	POS513-60	Minoan	>5	Kutterolf 2021	sea core
36.2522	25.2706	POS513-61	Minoan	>5	Kutterolf 2021	sea core
38.3202	26.2993	Bağlararası	Minoan	2	Şahoğlu et al. 2022	archeological
37.6093	28.0114	Tepecik Höyüğü	Minoan	37	Günel and Sterba 2024	archeological
38.0558	28.7752	Yayla Lake	Minoan	14	Doğan et al. 2025	lake sediments
37.8932	30.6061	Paleokuleönü	Minoan	1.5	Şenkul et al. 2025	lake sediments
37.2601	28.2079	Bayır	Minoan	62	This Study	terrestrial
37.7333	25.5833	V10-48	Minoan	Absent	Ninkovich and Heezen 1965	sea core
36.6253	23.2586	V10-38	Minoan	Absent	Ninkovich and Heezen 1965	sea core
35.9204	23.6755	V14-133	Minoan	Absent	Ninkovich and Heezen 1965	sea core
35.992	23.7034	V14-134	Minoan	Absent	Ninkovich and Heezen 1965	sea core
35.7667	23.4	V14-132	Minoan	Absent	Ninkovich and Heezen 1965	sea core
34.8	23.4833	ALB-194	Minoan	Absent	Ninkovich and Heezen 1965	sea core
34.6167	23.4167	V10-65	Minoan	Absent	Ninkovich and Heezen 1965	sea core
34.3833	24.1	V10-64	Minoan	Absent	Ninkovich and Heezen 1965	sea core
33.2	26	V14-131	Minoan	Absent	Ninkovich and Heezen 1965	sea core
33.4162	28.4455	V10-57	Minoan	Absent	Ninkovich and Heezen 1965	sea core
33.3347	29.0981	V10-53	Minoan	Absent	Ninkovich and Heezen 1965	sea core
32.9224	29.6159	V10-54	Minoan	Absent	Ninkovich and Heezen 1965	sea core
32.8753	29.3916	V10-55	Minoan	Absent	Ninkovich and Heezen 1965	sea core
35.8167	28.9667	V10-60	Minoan	Absent	Ninkovich and Heezen 1965	sea core
35.9592	31.6909	RC9-176	Minoan	Absent	Ninkovich and Heezen 1965	sea core
36.3103	29.3648	Ova Lake	Minoan	Absent	Hubler and Bichler 2003	lake sediments
37.768	37.5959	Gölbaşı	Minoan	Absent	Hubler and Bichler 2003	core data
35.8004	36.7935	Ebla	Minoan	Absent	Hubler and Bichler 2003	archeological
36.304	36.3823	Amik	Minoan	Absent	Hubler and Bichler 2003	core data
34.8846	33.613	Hala Sultan Tekke	Minoan	Absent	Hubler and Bichler 2003	terrestrial
32.578	35.18	Megiddo	Minoan	Absent	Hubler and Bichler 2003	archeological
31.2535	35.4518	Dead Sea	Minoan	Absent	Hubler and Bichler 2003	lake sediments
30.7823	31.822	Tell el Daba	Minoan	Absent	Hubler and Bichler 2003	archeological
32.578	35.18	Megiddo	Minoan	Absent	Bichler 2006	archeological
38.0662	26.3717	MAR03-2	Minoan	Absent	Aksu et al. 2008	sea core
39.4725	25.862	MAR03-48	Minoan	Absent	Aksu et al. 2008	sea core
39.4683	25.8573	MAR03-49	Minoan	Absent	Aksu et al. 2008	sea core
39.403	26.0687	MAR02-113	Minoan	Absent	Aksu et al. 2008	sea core
40.8365	27.7573	MAR02-102	Minoan	Absent	Aksu et al. 2008	sea core
40.8458	27.7553	MAR02-21	Minoan	Absent	Aksu et al. 2008	sea core
40.8423	27.7945	MAR98-12	Minoan	Absent	Aksu et al. 2008	sea core
40.6717	28.8565	MAR02-89	Minoan	Absent	Aksu et al. 2008	sea core

## Sheet: References
References
Ninkovich D, Heezen BC (1965) Santorini Tephra. Butterworths Scientific Publications, London pp 413-453
Bond A, Sparks RSJ (1976). The Minoan Eruption of Santorini, Greece. J. Geol. Soc. 132(1):1-16. https://doi.org/10.1144/gsjgs.132.1.0001
Watkins ND, Sparks RSJ, Sigurdsson H, Huang TC, Federman A, Carey S, Ninkovich D (1978) Volume and extent of the Minoan Tephra from Santorini Volcano: New Evidence from deep-sea sediment cores. Nature 271(5641):122-126. https://doi.org/10.1038/271122a0
Federman AN, Carey SN (1980) Electron microprobe correlation of tephra layers from Eastern Mediterranean abyssal sediments and the island of Santorini. Quat. Res. 13(2):160-171. https://doi.org/10.1016/0033-5894(80)90026-5
Sparks RSJ, Brazier S, Huang TC, Muerdter D (1983) Sedimentology of the Minoan deep-sea tephra layer in the Aegean and Eastern Mediterranean. Mar. Geol. 54(1-2):131-167. https://doi.org/10.1016/0025-3227(83)90011-7
Vinci A (1985) Distribution and chemical composition of tephra layers from eastern Mediterranean abyssal sediments. Mar. Geol. 64(1-2):143-155. https://doi.org/10.1016/0025-3227(85)90165-3
Sullivan DG (1990) Minoan Tephra in lake sediments in Western Turkey, dating the eruption and assessing the atmospheric dispersal of the ash. In: Postlethwaite N (ed) Thera and the Aegean World III. Cambridge University Press, London, p 119
Stanley DJ, Sheng H (1986) Volcanic shards from Santorini (Upper Minoan Ash) in the Nile Delta, Egypt. Nature, 320(6064):733-735. https://doi.org/10.1038/320733a0
Sullivan DG (1988) The discovery of Santorini Minoan Tephra in Western Turkey. Nature 333(6173):552-554. https://doi.org/10.1038/333552a0
Marketou T (1990) Santorini tephra from Rhodes and Kos: Some chronological remarks based on the stratigraphy. In: Postlethwaite N (ed) Thera and the Aegean World III. Cambridge University Press, London, 3:100-113
Guichard F, Carey S, Arthur MA, Sigurdsson H, Arnold M (1993) Tephra from the Minoan eruption of Santorini in sediments of the Black Sea. Nature 363(6430):610-612. https://doi.org/10.1038/363610a0
Eastwood WJ, Pearce NJ, Westgate JA, Perkins WT (1998) Recognition of Santorini (Minoan) Tephra in lake sediments from Gölhisar Gölü, southwest Turkey by laser ablation ICP-MS. J. Archaeol. Sci. 25(7):677-687. https://doi.org/10.1006/jasc.1997.0218
Momigliano N, Belli P, Bichler M, Hilditch J, Knappett CJ, Pirrie D et al (2012). Bronze Age Carian Iasos: structures and finds from the area of the Roman Agora (c. 3000-1500 BC). Cambridge University Press pp 226
Minoura K, Imamura F, Kuran U, Nakamura T, Papadopoulos GA, Takahashi T, Yalciner AC (2000) Discovery of Minoan tsunami deposits. Geology 28(1):59-62. https://doi.org/10.1130/0091-7613(2000)028<0059:DOMTD>2.0.CO;2
Bottema S, Sarpaki A (2003) Environmental change in Crete: A 9000-year record of Holocene Vegetation history and the effect of the Santorini Eruption. The Holocene 13(5):733-749. https://doi.org/10.1191/0959683603hl659rp
Lamy F, Arz HW, Bond GC, Bahr A, Pätzold J (2006) Multicentennial‐scale hydrological changes in the Black Sea and Northern Red Sea during the Holocene and the Arctic/North Atlantic oscillation. Paleoceanography 21(1). https://doi.org/10.1029/2005PA001184
Kwiecien O, Arz HW, Lamy F, Wulf S, Bahr A, Röhl U, Haug GH (2008) Estimated reservoir ages of the Black Sea since the last glacial. Radiocarbon 50(1):99-118. https://doi.org/10.1017/S0033822200043393
Aksu AE, Jenner G, Hiscott RN, İşler EB (2008) Occurrence, Stratigraphy and geochemistry of late Quaternary tephra layers in the Aegean Sea and the Marmara Sea. Mar. Geol. 252(3-4):174-192. https://doi.org/10.1016/j.margeo.2008.04.004
Sulpizio R, Alçiçek MC, Zanchetta G, Solari L (2013) Recognition of the Minoan Tephra in the Acigöl Basin, Western Turkey: Implications for inter‐archive correlations and fine ash dispersal. J. Quat. Sci. 28(4):329-335. https://doi.org/10.1002/jqs.2630
Kayan İ (1999) Holocene stratigraphy and geomorphological evolution of the Aegean coastal plains of Anatolia. Quat. Sci. Rev. 18(4-5):541-548. https://doi.org/10.1016/S0277-3791(98)90095-6
Kayan İ, Öner E (2013) Holocene geomorphological evolution of coastal environment around Bayraklı mound (İzmir). Profesör Doktor Asaf Koçman’a Armağan. Ege Üniversitesi Basımevi. İzmir, 135-158
Cullen VL., Smith VC, Arz HW (2014) The detailed tephrostratigraphy of a core from the south‐east Black Sea spanning the last∼ 60 ka. J. Quat. Sci. 29(7):675-690. https://doi.org/10.1002/jqs.2739
Satow C, Tomlinson EL, Grant KM, Albert PG, Smith VC, Manning CJ et al (2015). A new contribution to the Late Quaternary tephrostratigraphy of the Mediterranean: Aegean Sea core LC21. Quat. Sci. Rev. 117:96-112. https://doi.org/10.1016/j.quascirev.2015.04.005
Vardar S, Öner, E (2016) Importance of the tephra of Santorini (Thera) in the paleogeography and geoarchaeology of the western and southwestern Anatolia. CBD 14(1):15-37. https://doi.org/10.1501/Cogbil_0000000171
Vardar S, Öner E (2017) New Santorini tephra data in western Anatolia and the importance on them on paleogeographical-geoarcheological interpretations. Türk Coğrafya Kurumu 75:8-10
Vardar S (2018) Holocene Paleogeography of the Güzelhisar River Coastal Plain Based on Sedimantological and Micropaleontological Evidence. Eastern Geographical Review 23(39):131-148
Vardar S (2018) The paleogeography of Marmara lake and geoarchaeological interpretations from Bronze Age to present, Manisa. CBD 16(2):217- 237
Bruins HJ, Keller J, Klügel A, Kisch HJ, Katra I, van der Plicht J (2019) Tephra in caves: Distal deposits of the Minoan Santorini eruption and the Campanian super-eruption. Quat. Int. 499:135-147. https://doi.org/10.1016/j.quaint.2018.09.040
Vardar S, İlhan R, Ertuğ Ö (2020) Preliminary Results of Paleocographical-Geoarcheological Research Around the Teos Ancient Settlement (Seferihisar-İzmir). Journal Of Geography (40):323-338. https://doi.org/10.26650/JGEOG2020-0014
Aydar E, Çiner A, Ersoy O, Écochard E, Fouache EG (2021) Volcanic ash and tsunami record of the Minoan Late Bronze Age eruption (Santorini) in a distal setting, southwestern Turkey. J. Quat. Sci. 36(4):586-597. https://doi.org/10.1002/jqs.3314
Kutterolf S, Freundt A, Hansteen TH, Dettbarn R, Hampel F, Sievers C et al (2021a). The medial off-shore record of explosive volcanism along the central to eastern Aegean Volcanic Arc: 1. Tephrostratigraphic correlations. Geochem. geophys. geosyst. 22(12):e2021gc010011. https://doi.org/10.1029/2021GC010010
Şahoğlu V, Sterba JH, Katz T, Çayır Ü, Gündoğan Ü, Tyuleneva N et al (2022). Volcanic ash, victims, and tsunami debris from the Late Bronze Age Thera eruption discovered at Çeşme-Bağlararası (Turkey). PNAS 119(1):e2114213118. https://doi.org/10.1073/pnas.2114213118
Günel S, Sterba JH (2024). Identification of a Volcanic Ash Layer from Çine-Tepecik, Turkey. Anatolica: annuaire internationale pour les civilisations de l'Asie anterieure. 50:35-52.
Doğan M, Özdemir Y, Bozkurt Y, Şenkul Ç (2025) Discovery and environmental implications of Santorini tephras (Cape Riva and Minoan) in sediments of Lake Yayla (West Anatolia). The Holocene 35(1):3-17. https://doi.org/10.1177/09596836241275007
Şenkul Ç, Ünlü Y, Özdemir Y, Kağan Kadioğlu Y, Gürboğa Ş (2025) New palaeolimnological record from West Anatolia (Paleo‐Kuleönü Lake) provides new information on the activity of the Gölcük volcanism and the distribution of the Santorini Minoan Eruption. J. Quat. Sci. 40(3):420-436. https://doi.org/10.1002/jqs.3688
Huber H Bichler M (2003). Geochemical correlation of archaeological sites using tephra from the Minoan eruption. Czech. J. Phys. 53(Suppl 1):A439-A453.
Bichler M (2006). Searching for" Minoan" Tephra at Megiddo. In Megiddo IV: The 1998-2002 Seasons (pp. 576-580). Emery and Claire Yass Publ. in Archaeology.
